# Supplementary material for: Modify the Injection Machine Mechanism to Enhance the Recycling of Plastic Waste Mixed with MHD Nanoparticles
Source: MDPI journal article supplement (doi:10.3390/su15032641), 2023-02-01
Supplement: s1 [file s1]

***“The Jidoka system investigates the modification of the injection machine used for recycling plastic material by mixing MHD controlled by mathematical WSA approaches.”***

.

Sincerely

|                                      |            |
|--------------------------------------|------------|
| Injection Speed*Injection pressure*  | -31.6706   |
| Melting temperature*Screw speed      |            |
| Injection Speed*Injection pressure*  | -150.435   |
| Viscosity*Screw speed                |            |
| Injection Speed*Melting temperature* | -26.3302   |
| Viscosity*Screw speed                |            |
| Injection pressure*                  | -12.5025   |
| Melting temperature*Viscosity*       |            |
| Screw speed                          |            |
| Flow rate*Injection Speed*           | 0.794096   |
| Injection pressure*                  |            |
| Melting temperature*Viscosity        |            |
| Flow rate*Injection Speed*           | 0.376637   |
| Injection pressure*                  |            |
| Melting temperature*Screw speed      |            |
| Flow rate*Injection Speed*           | 3.01998    |
| Injection pressure*Viscosity*        |            |
| Screw speed                          |            |
| Flow rate*Injection Speed*           | 0.397534   |
| Melting temperature*Viscosity*       |            |
| Screw speed                          |            |
| Flow rate*Injection pressure*        | 0.158603   |
| Melting temperature*Viscosity*       |            |
| Screw speed                          |            |
| Injection Speed*Injection pressure*  | 5.12168    |
| Melting temperature*Viscosity*       |            |
| Screw speed                          |            |
| Flow rate*Injection Speed*           | -0.0695079 |
| Injection pressure*                  |            |
| Melting temperature*Viscosity*       |            |
| Screw speed                          |            |

## Effects Pareto for Bubbles

\* NOTE \* Some factors have more than 2 levels, no alias table was printed.

## Response Optimization

Parameters

|              | Goal   | Lower | Target | Upper | Weight | Import |
|--------------|--------|-------|--------|-------|--------|--------|
| Hard fitting | Target | 7     | 9      | 12    | 1      | 1      |
| Black dots   | Target | 6     | 13     | 18    | 1      | 1      |
| Bubbles      | Target | 3     | 7      | 8     | 1      | 1      |

Global Solution

|              |   |         |
|--------------|---|---------|
| Flow rate    | = | 219.323 |
| Injection Sp | = | 2.31867 |

Injection pr = 7.77778  
Melting temp = 42.4949  
Viscosity = 5.99556  
Screw speed = 19.6013

#### Predicted Responses

Hard fitting = 8.9631 , desirability = 0.981555  
Black dots = 13.2648 , desirability = 0.947032  
Bubbles = 7.0370 , desirability = 0.963010

Composite Desirability = 0.963763

### Optimization Plot

---

**9/12/2022 3:16:32 PM**

---

Welcome to Minitab, press F1 for help.

Retrieving project from file: 'D:\0 RESEARHES\0 NOW 2021\0 JIDOKA\MINITAB  
6-09-2022.MPJ'

### Response Optimization

#### Parameters

|              | Goal   | Lower | Target | Upper | Weight | Import |
|--------------|--------|-------|--------|-------|--------|--------|
| Hard fitting | Target | 2     | 3      | 4     | 1      | 1      |
| Black dots   | Target | 2     | 3      | 4     | 1      | 1      |
| Bubbles      | Target | 2     | 3      | 4     | 1      | 1      |

#### Global Solution

Flow rate = 87.3145  
Injection Sp = 2.06233  
Injection pr = 4.52892  
Melting temp = 35  
Viscosity = 4.24242  
Screw speed = 7.90555

#### Predicted Responses

Hard fitting = 3.00000 , desirability = 1.000000  
Black dots = 3.00000 , desirability = 1.000000  
Bubbles = 3.00000 , desirability = 1.000000

Composite Desirability = 1.000000

### Optimization Plot

---

**12/30/2022 6:44:39 PM**

---

Welcome to Minitab, press F1 for help.  
 Retrieving project from file: 'D:\0 RESEARHES\0 NOW 2021\0 JIDOKA\MINITAB  
 6-09-2022.MPJ'

## Factorial Fit: Bubbles versus Flow rate, Injection Speed, ...

\* NOTE \* This design has some botched runs. It will be analyzed using a regression approach.

Estimated Effects and Coefficients for Bubbles (coded units)

| Term                                                       | Effect     | Coef      | SE Coef   | T     |
|------------------------------------------------------------|------------|-----------|-----------|-------|
| Constant                                                   |            | 44688006  | 322226422 | 0.14  |
| Flow rate                                                  | 56053984   | 28026992  | 195388284 | 0.14  |
| Injection Speed                                            | 248892     | 124446    | 4085062   | 0.03  |
| Injection pressure                                         | 12032543   | 6016272   | 19424977  | 0.31  |
| Melting temperature                                        | -2717999   | -1358999  | 11527861  | -0.12 |
| Viscosity                                                  | -12385855  | -6192928  | 146902465 | -0.04 |
| Screw speed                                                | -100049050 | -50024525 | 513771691 | -0.10 |
| Flow rate*Injection Speed                                  | 130738     | 65369     | 2476507   | 0.03  |
| Flow rate*Injection pressure                               | 7223442    | 3611721   | 11779420  | 0.31  |
| Flow rate*Melting temperature                              | -1717478   | -858739   | 6990484   | -0.12 |
| Flow rate*Viscosity                                        | -6524850   | -3262425  | 89048800  | -0.04 |
| Flow rate*Screw speed                                      | -59193833  | -29596917 | 311280402 | -0.10 |
| Injection Speed*Injection pressure                         | -212331    | -106166   | 244822    | -0.43 |
| Injection Speed*Melting temperature                        | -15324     | -7662     | 145940    | -0.05 |
| Injection Speed*Viscosity                                  | 739222     | 369611    | 1860777   | 0.20  |
| Injection Speed*Screw speed                                | 2593127    | 1296563   | 6290614   | 0.21  |
| Injection pressure*<br>Melting temperature                 | -501836    | -250918   | 697145    | -0.36 |
| Injection pressure*Viscosity                               | 11542009   | 5771004   | 9072196   | 0.64  |
| Injection pressure*Screw speed                             | 34445196   | 17222598  | 30750272  | 0.56  |
| Melting temperature*Viscosity                              | 718351     | 359176    | 5288627   | 0.07  |
| Melting temperature*Screw speed                            | 4661467    | 2330733   | 18225705  | 0.13  |
| Viscosity*Screw speed                                      | -131644140 | -65822070 | 209104528 | -0.31 |
| Flow rate*Injection Speed*<br>Injection pressure           | -127921    | -63961    | 148410    | -0.43 |
| Flow rate*Injection Speed*<br>Melting temperature          | -8540      | -4270     | 88479     | -0.05 |
| Flow rate*Injection pressure*<br>Melting temperature       | -301562    | -150781   | 422792    | -0.36 |
| Flow rate*Injection Speed*Viscosity                        | 437376     | 218688    | 1127729   | 0.19  |
| Flow rate*Injection pressure*<br>Viscosity                 | 6961316    | 3480658   | 5501467   | 0.63  |
| Flow rate*Melting temperature*<br>Viscosity                | 398781     | 199391    | 3205977   | 0.06  |
| Flow rate*Injection Speed*<br>Screw speed                  | 1561362    | 780681    | 3810164   | 0.20  |
| Flow rate*Injection pressure*<br>Screw speed               | 20890258   | 10445129  | 18661146  | 0.56  |
| Flow rate*Melting temperature*<br>Screw speed              | 2770026    | 1385013   | 11046130  | 0.13  |
| Flow rate*Viscosity*Screw speed                            | -78942383  | -39471192 | 126659324 | -0.31 |
| Injection Speed*Injection pressure*<br>Melting temperature | 8488       | 4244      | 8774      | 0.48  |
| Injection Speed*Injection pressure*<br>Viscosity           | -168216    | -84108    | 113796    | -0.74 |
| Injection Speed*Melting temperature*<br>Viscosity          | -30042     | -15021    | 66860     | -0.22 |

|                                                                                      |          |          |          |       |
|--------------------------------------------------------------------------------------|----------|----------|----------|-------|
| Injection Speed*Injection pressure*<br>Screw speed                                   | -438085  | -219043  | 374011   | -0.59 |
| Injection Speed*Melting temperature*<br>Screw speed                                  | -108626  | -54313   | 223016   | -0.24 |
| Injection Speed*Viscosity*<br>Screw speed                                            | 2211295  | 1105647  | 2603280  | 0.42  |
| Injection pressure*<br>Melting temperature*Viscosity                                 | -452455  | -226228  | 328594   | -0.69 |
| Injection pressure*<br>Melting temperature*Screw speed                               | -1388584 | -694292  | 1074520  | -0.65 |
| Injection pressure*Viscosity*<br>Screw speed                                         | 25264944 | 12632472 | 13264101 | 0.95  |
| Melting temperature*Viscosity*<br>Screw speed                                        | 5329651  | 2664826  | 7446529  | 0.36  |
| Flow rate*Injection Speed*<br>Injection pressure*<br>Melting temperature             | 5116     | 2558     | 5319     | 0.48  |
| Flow rate*Injection Speed*<br>Injection pressure*Viscosity                           | -101567  | -50783   | 68987    | -0.74 |
| Flow rate*Injection Speed*<br>Melting temperature*Viscosity                          | -17811   | -8905    | 40523    | -0.22 |
| Flow rate*Injection pressure*<br>Melting temperature*Viscosity                       | -272944  | -136472  | 199280   | -0.68 |
| Flow rate*Injection Speed*<br>Injection pressure*Screw speed                         | -265868  | -132934  | 226997   | -0.59 |
| Flow rate*Injection Speed*<br>Melting temperature*Screw speed                        | -65439   | -32720   | 135126   | -0.24 |
| Flow rate*Injection pressure*<br>Melting temperature*Screw speed                     | -842012  | -421006  | 652378   | -0.65 |
| Flow rate*Injection Speed*Viscosity*<br>Screw speed                                  | 1333282  | 666641   | 1576300  | 0.42  |
| Flow rate*Injection pressure*<br>Viscosity*Screw speed                               | 15315357 | 7657679  | 8058816  | 0.95  |
| Flow rate*Melting temperature*<br>Viscosity*Screw speed                              | 3198060  | 1599030  | 4512462  | 0.35  |
| Injection Speed*Injection pressure*<br>Melting temperature*Viscosity                 | 6508     | 3254     | 4115     | 0.79  |
| Injection Speed*Injection pressure*<br>Melting temperature*Screw speed               | 17703    | 8852     | 13124    | 0.67  |
| Injection Speed*Injection pressure*<br>Viscosity*Screw speed                         | -313338  | -156669  | 164741   | -0.95 |
| Injection Speed*Melting temperature*<br>Viscosity*Screw speed                        | -87861   | -43931   | 92676    | -0.47 |
| Injection pressure*<br>Melting temperature*Viscosity*<br>Screw speed                 | -989549  | -494775  | 468048   | -1.06 |
| Flow rate*Injection Speed*<br>Injection pressure*<br>Melting temperature*Viscosity   | 3930     | 1965     | 2495     | 0.79  |
| Flow rate*Injection Speed*<br>Injection pressure*<br>Melting temperature*Screw speed | 10742    | 5371     | 7970     | 0.67  |
| Flow rate*Injection Speed*<br>Injection pressure*Viscosity*<br>Screw speed           | -190016  | -95008   | 100116   | -0.95 |
| Flow rate*Injection Speed*<br>Melting temperature*Viscosity*<br>Screw speed          | -52986   | -26493   | 56141    | -0.47 |
| Flow rate*Injection pressure*<br>Melting temperature*Viscosity*<br>Screw speed       | -599802  | -299901  | 284528   | -1.05 |
| Injection Speed*Injection pressure*<br>Melting temperature*Viscosity*                | 12309    | 6154     | 5851     | 1.05  |

|                                |      |      |      |      |
|--------------------------------|------|------|------|------|
| Screw speed                    |      |      |      |      |
| Flow rate*Injection Speed*     | 7464 | 3732 | 3558 | 1.05 |
| Injection pressure*            |      |      |      |      |
| Melting temperature*Viscosity* |      |      |      |      |
| Screw speed                    |      |      |      |      |

| Term                                 | P     |
|--------------------------------------|-------|
| Constant                             | 0.893 |
| Flow rate                            | 0.889 |
| Injection Speed                      | 0.976 |
| Injection pressure                   | 0.764 |
| Melting temperature                  | 0.909 |
| Viscosity                            | 0.967 |
| Screw speed                          | 0.925 |
| Flow rate*Injection Speed            | 0.980 |
| Flow rate*Injection pressure         | 0.766 |
| Flow rate*Melting temperature        | 0.905 |
| Flow rate*Viscosity                  | 0.972 |
| Flow rate*Screw speed                | 0.926 |
| Injection Speed*Injection pressure   | 0.675 |
| Injection Speed*Melting temperature  | 0.959 |
| Injection Speed*Viscosity            | 0.847 |
| Injection Speed*Screw speed          | 0.841 |
| Injection pressure*                  | 0.727 |
| Melting temperature                  |       |
| Injection pressure*Viscosity         | 0.541 |
| Injection pressure*Screw speed       | 0.589 |
| Melting temperature*Viscosity        | 0.947 |
| Melting temperature*Screw speed      | 0.901 |
| Viscosity*Screw speed                | 0.760 |
| Flow rate*Injection Speed*           | 0.677 |
| Injection pressure                   |       |
| Flow rate*Injection Speed*           | 0.963 |
| Melting temperature                  |       |
| Flow rate*Injection pressure*        | 0.730 |
| Melting temperature                  |       |
| Flow rate*Injection Speed*Viscosity  | 0.851 |
| Flow rate*Injection pressure*        | 0.543 |
| Viscosity                            |       |
| Flow rate*Melting temperature*       | 0.952 |
| Viscosity                            |       |
| Flow rate*Injection Speed*           | 0.842 |
| Screw speed                          |       |
| Flow rate*Injection pressure*        | 0.589 |
| Screw speed                          |       |
| Flow rate*Melting temperature*       | 0.903 |
| Screw speed                          |       |
| Flow rate*Viscosity*Screw speed      | 0.762 |
| Injection Speed*Injection pressure*  | 0.640 |
| Melting temperature                  |       |
| Injection Speed*Injection pressure*  | 0.479 |
| Viscosity                            |       |
| Injection Speed*Melting temperature* | 0.827 |
| Viscosity                            |       |
| Injection Speed*Injection pressure*  | 0.572 |
| Screw speed                          |       |
| Injection Speed*Melting temperature* | 0.813 |
| Screw speed                          |       |
| Injection Speed*Viscosity*           | 0.681 |
| Screw speed                          |       |
| Injection pressure*                  | 0.509 |
| Melting temperature*Viscosity        |       |
| Injection pressure*                  | 0.534 |

|                                      |       |
|--------------------------------------|-------|
| Melting temperature*Screw speed      |       |
| Injection pressure*Viscosity*        | 0.366 |
| Screw speed                          |       |
| Melting temperature*Viscosity*       | 0.729 |
| Screw speed                          |       |
| Flow rate*Injection Speed*           | 0.642 |
| Injection pressure*                  |       |
| Melting temperature                  |       |
| Flow rate*Injection Speed*           | 0.480 |
| Injection pressure*Viscosity         |       |
| Flow rate*Injection Speed*           | 0.831 |
| Melting temperature*Viscosity        |       |
| Flow rate*Injection pressure*        | 0.511 |
| Melting temperature*Viscosity        |       |
| Flow rate*Injection Speed*           | 0.573 |
| Injection pressure*Screw speed       |       |
| Flow rate*Injection Speed*           | 0.814 |
| Melting temperature*Screw speed      |       |
| Flow rate*Injection pressure*        | 0.535 |
| Melting temperature*Screw speed      |       |
| Flow rate*Injection Speed*Viscosity* | 0.682 |
| Screw speed                          |       |
| Flow rate*Injection pressure*        | 0.367 |
| Viscosity*Screw speed                |       |
| Flow rate*Melting temperature*       | 0.731 |
| Viscosity*Screw speed                |       |
| Injection Speed*Injection pressure*  | 0.449 |
| Melting temperature*Viscosity        |       |
| Injection Speed*Injection pressure*  | 0.517 |
| Melting temperature*Screw speed      |       |
| Injection Speed*Injection pressure*  | 0.366 |
| Viscosity*Screw speed                |       |
| Injection Speed*Melting temperature* | 0.647 |
| Viscosity*Screw speed                |       |
| Injection pressure*                  | 0.318 |
| Melting temperature*Viscosity*       |       |
| Screw speed                          |       |
| Flow rate*Injection Speed*           | 0.451 |
| Injection pressure*                  |       |
| Melting temperature*Viscosity        |       |
| Flow rate*Injection Speed*           | 0.517 |
| Injection pressure*                  |       |
| Melting temperature*Screw speed      |       |
| Flow rate*Injection Speed*           | 0.367 |
| Injection pressure*Viscosity*        |       |
| Screw speed                          |       |
| Flow rate*Injection Speed*           | 0.648 |
| Melting temperature*Viscosity*       |       |
| Screw speed                          |       |
| Flow rate*Injection pressure*        | 0.319 |
| Melting temperature*Viscosity*       |       |
| Screw speed                          |       |
| Injection Speed*Injection pressure*  | 0.320 |
| Melting temperature*Viscosity*       |       |
| Screw speed                          |       |
| Flow rate*Injection Speed*           | 0.322 |
| Injection pressure*                  |       |
| Melting temperature*Viscosity*       |       |
| Screw speed                          |       |

S = 5.97507      PRESS = 2885981  
 R-Sq = 96.20%    R-Sq(pred) = 0.00%    R-Sq(adj) = 69.63%

Analysis of Variance for Bubbles (coded units)

| Source                                           | DF |
|--------------------------------------------------|----|
| Main Effects                                     | 6  |
| Flow rate                                        | 1  |
| Injection Speed                                  | 1  |
| Injection pressure                               | 1  |
| Melting temperature                              | 1  |
| Viscosity                                        | 1  |
| Screw speed                                      | 1  |
| 2-Way Interactions                               | 15 |
| Flow rate*Injection Speed                        | 1  |
| Flow rate*Injection pressure                     | 1  |
| Flow rate*Melting temperature                    | 1  |
| Flow rate*Viscosity                              | 1  |
| Flow rate*Screw speed                            | 1  |
| Injection Speed*Injection pressure               | 1  |
| Injection Speed*Melting temperature              | 1  |
| Injection Speed*Viscosity                        | 1  |
| Injection Speed*Screw speed                      | 1  |
| Injection pressure*Melting temperature           | 1  |
| Injection pressure*Viscosity                     | 1  |
| Injection pressure*Screw speed                   | 1  |
| Melting temperature*Viscosity                    | 1  |
| Melting temperature*Screw speed                  | 1  |
| Viscosity*Screw speed                            | 1  |
| 3-Way Interactions                               | 20 |
| Flow rate*Injection Speed*Injection pressure     | 1  |
| Flow rate*Injection Speed*Melting temperature    | 1  |
| Flow rate*Injection pressure*Melting temperature | 1  |
| Flow rate*Injection Speed*Viscosity              | 1  |

Flow rate\*Injection pressure\*Viscosity  
 1  
 Flow rate\*Melting temperature\*Viscosity  
 1  
 Flow rate\*Injection Speed\*Screw speed  
 1  
 Flow rate\*Injection pressure\*Screw speed  
 1  
 Flow rate\*Melting temperature\*Screw speed  
 1  
 Flow rate\*Viscosity\*Screw speed  
 1  
 Injection Speed\*Injection pressure\*Melting temperature  
 1  
 Injection Speed\*Injection pressure\*Viscosity  
 1  
 Injection Speed\*Melting temperature\*Viscosity  
 1  
 Injection Speed\*Injection pressure\*Screw speed  
 1  
 Injection Speed\*Melting temperature\*Screw speed  
 1  
 Injection Speed\*Viscosity\*Screw speed  
 1  
 Injection pressure\*Melting temperature\*Viscosity  
 1  
 Injection pressure\*Melting temperature\*Screw speed  
 1  
 Injection pressure\*Viscosity\*Screw speed  
 1  
 Melting temperature\*Viscosity\*Screw speed  
 1  
 4-Way Interactions  
 15  
 Flow rate\*Injection Speed\*Injection pressure\*Melting temperature  
 1  
 Flow rate\*Injection Speed\*Injection pressure\*Viscosity  
 1  
 Flow rate\*Injection Speed\*Melting temperature\*Viscosity  
 1  
 Flow rate\*Injection pressure\*Melting temperature\*Viscosity  
 1  
 Flow rate\*Injection Speed\*Injection pressure\*Screw speed  
 1  
 Flow rate\*Injection Speed\*Melting temperature\*Screw speed  
 1  
 Flow rate\*Injection pressure\*Melting temperature\*Screw speed  
 1  
 Flow rate\*Injection Speed\*Viscosity\*Screw speed  
 1  
 Flow rate\*Injection pressure\*Viscosity\*Screw speed  
 1  
 Flow rate\*Melting temperature\*Viscosity\*Screw speed  
 1  
 Injection Speed\*Injection pressure\*Melting temperature\*Viscosity  
 1  
 Injection Speed\*Injection pressure\*Melting temperature\*Screw speed  
 1  
 Injection Speed\*Injection pressure\*Viscosity\*Screw speed  
 1  
 Injection Speed\*Melting temperature\*Viscosity\*Screw speed  
 1



```

Injection pressure*Melting temperature*Viscosity*Screw speed
1
5-Way Interactions
6
Flow rate*Injection Speed*Injection pressure*Melting temperature*Viscosity
1
Flow rate*Injection Speed*Injection pressure*Melting temperature*Screw speed
1
Flow rate*Injection Speed*Injection pressure*Viscosity*Screw speed
1
Flow rate*Injection Speed*Melting temperature*Viscosity*Screw speed
1
Flow rate*Injection pressure*Melting temperature*Viscosity*Screw speed
1
Injection Speed*Injection pressure*Melting temperature*Viscosity*Screw speed
1
6-Way Interactions
1
Flow rate*Injection Speed*Injection pressure*Melting
temperature*Viscosity*Screw speed 1
Residual Error
9
Total
72

```

```

Source
Seq SS
Main Effects
1281.56
Flow rate
375.84
Injection Speed
1.28
Injection pressure
286.37
Melting temperature
326.25
Viscosity
26.13
Screw speed
265.71
2-Way Interactions
1406.68
Flow rate*Injection Speed
1.20
Flow rate*Injection pressure
89.38
Flow rate*Melting temperature
245.33
Flow rate*Viscosity
14.15
Flow rate*Screw speed
56.88
Injection Speed*Injection pressure
16.49
Injection Speed*Melting temperature
64.52
Injection Speed*Viscosity
170.92
Injection Speed*Screw speed
17.28
Injection pressure*Melting temperature
201.38

```

|                                                                  |         |
|------------------------------------------------------------------|---------|
| Injection pressure*Viscosity                                     | 151.64  |
| Injection pressure*Screw speed                                   | 156.84  |
| Melting temperature*Viscosity                                    | 1.62    |
| Melting temperature*Screw speed                                  | 14.16   |
| Viscosity*Screw speed                                            | 204.89  |
| 3-Way Interactions                                               | 3627.68 |
| Flow rate*Injection Speed*Injection pressure                     | 128.92  |
| Flow rate*Injection Speed*Melting temperature                    | 6.39    |
| Flow rate*Injection pressure*Melting temperature                 | 431.22  |
| Flow rate*Injection Speed*Viscosity                              | 78.77   |
| Flow rate*Injection pressure*Viscosity                           | 31.71   |
| Flow rate*Melting temperature*Viscosity                          | 1226.08 |
| Flow rate*Injection Speed*Screw speed                            | 129.12  |
| Flow rate*Injection pressure*Screw speed                         | 15.66   |
| Flow rate*Melting temperature*Screw speed                        | 143.52  |
| Flow rate*Viscosity*Screw speed                                  | 86.02   |
| Injection Speed*Injection pressure*Melting temperature           | 374.08  |
| Injection Speed*Injection pressure*Viscosity                     | 375.68  |
| Injection Speed*Melting temperature*Viscosity                    | 211.98  |
| Injection Speed*Injection pressure*Screw speed                   | 23.84   |
| Injection Speed*Melting temperature*Screw speed                  | 1.45    |
| Injection Speed*Viscosity*Screw speed                            | 189.16  |
| Injection pressure*Melting temperature*Viscosity                 | 0.08    |
| Injection pressure*Melting temperature*Screw speed               | 39.42   |
| Injection pressure*Viscosity*Screw speed                         | 81.58   |
| Melting temperature*Viscosity*Screw speed                        | 53.01   |
| 4-Way Interactions                                               | 1356.54 |
| Flow rate*Injection Speed*Injection pressure*Melting temperature | 55.27   |
| Flow rate*Injection Speed*Injection pressure*Viscosity           | 32.84   |
| Flow rate*Injection Speed*Melting temperature*Viscosity          | 143.40  |
| Flow rate*Injection pressure*Melting temperature*Viscosity       | 11.93   |

|                                                                                        |       |
|----------------------------------------------------------------------------------------|-------|
| Flow rate*Injection Speed*Injection pressure*Screw speed                               |       |
| 20.91                                                                                  |       |
| Flow rate*Injection Speed*Melting temperature*Screw speed                              |       |
| 1.59                                                                                   |       |
| Flow rate*Injection pressure*Melting temperature*Screw speed                           |       |
| 16.60                                                                                  |       |
| Flow rate*Injection Speed*Viscosity*Screw speed                                        |       |
| 28.37                                                                                  |       |
| Flow rate*Injection pressure*Viscosity*Screw speed                                     |       |
| 5.23                                                                                   |       |
| Flow rate*Melting temperature*Viscosity*Screw speed                                    |       |
| 767.85                                                                                 |       |
| Injection Speed*Injection pressure*Melting temperature*Viscosity                       |       |
| 34.57                                                                                  |       |
| Injection Speed*Injection pressure*Melting temperature*Screw speed                     |       |
| 13.60                                                                                  |       |
| Injection Speed*Injection pressure*Viscosity*Screw speed                               |       |
| 115.97                                                                                 |       |
| Injection Speed*Melting temperature*Viscosity*Screw speed                              |       |
| 97.49                                                                                  |       |
| Injection pressure*Melting temperature*Viscosity*Screw speed                           |       |
| 10.94                                                                                  |       |
| 5-Way Interactions                                                                     |       |
| 431.71                                                                                 |       |
| Flow rate*Injection Speed*Injection pressure*Melting temperature*Viscosity             |       |
| 39.51                                                                                  |       |
| Flow rate*Injection Speed*Injection pressure*Melting temperature*Screw speed           |       |
| 10.04                                                                                  |       |
| Flow rate*Injection Speed*Injection pressure*Viscosity*Screw speed                     |       |
| 376.81                                                                                 |       |
| Flow rate*Injection Speed*Melting temperature*Viscosity*Screw speed                    |       |
| 2.42                                                                                   |       |
| Flow rate*Injection pressure*Melting temperature*Viscosity*Screw speed                 |       |
| 0.43                                                                                   |       |
| Injection Speed*Injection pressure*Melting temperature*Viscosity*Screw speed           |       |
| 2.49                                                                                   |       |
| 6-Way Interactions                                                                     |       |
| 39.28                                                                                  |       |
| Flow rate*Injection Speed*Injection pressure*Melting temperature*Viscosity*Screw speed | 39.28 |
| Residual Error                                                                         |       |
| 321.31                                                                                 |       |
| Total                                                                                  |       |
| 8464.77                                                                                |       |

|                     |  |
|---------------------|--|
| Source              |  |
| Adj SS              |  |
| Main Effects        |  |
| 382.37              |  |
| Flow rate           |  |
| 0.73                |  |
| Injection Speed     |  |
| 0.03                |  |
| Injection pressure  |  |
| 3.42                |  |
| Melting temperature |  |
| 0.50                |  |
| Viscosity           |  |
| 0.06                |  |
| Screw speed         |  |
| 0.34                |  |
| 2-Way Interactions  |  |
| 1302.58             |  |

Flow rate\*Injection Speed  
 0.02  
 Flow rate\*Injection pressure  
 3.36  
 Flow rate\*Melting temperature  
 0.54  
 Flow rate\*Viscosity  
 0.05  
 Flow rate\*Screw speed  
 0.32  
 Injection Speed\*Injection pressure  
 6.71  
 Injection Speed\*Melting temperature  
 0.10  
 Injection Speed\*Viscosity  
 1.41  
 Injection Speed\*Screw speed  
 1.52  
 Injection pressure\*Melting temperature  
 4.62  
 Injection pressure\*Viscosity  
 14.45  
 Injection pressure\*Screw speed  
 11.20  
 Melting temperature\*Viscosity  
 0.16  
 Melting temperature\*Screw speed  
 0.58  
 Viscosity\*Screw speed  
 3.54  
 3-Way Interactions  
 1799.09  
 Flow rate\*Injection Speed\*Injection pressure  
 6.63  
 Flow rate\*Injection Speed\*Melting temperature  
 0.08  
 Flow rate\*Injection pressure\*Melting temperature  
 4.54  
 Flow rate\*Injection Speed\*Viscosity  
 1.34  
 Flow rate\*Injection pressure\*Viscosity  
 14.29  
 Flow rate\*Melting temperature\*Viscosity  
 0.14  
 Flow rate\*Injection Speed\*Screw speed  
 1.50  
 Flow rate\*Injection pressure\*Screw speed  
 11.19  
 Flow rate\*Melting temperature\*Screw speed  
 0.56  
 Flow rate\*Viscosity\*Screw speed  
 3.47  
 Injection Speed\*Injection pressure\*Melting temperature  
 8.35  
 Injection Speed\*Injection pressure\*Viscosity  
 19.50  
 Injection Speed\*Melting temperature\*Viscosity  
 1.80  
 Injection Speed\*Injection pressure\*Screw speed  
 12.25  
 Injection Speed\*Melting temperature\*Screw speed  
 2.12

|                                                                                        |       |
|----------------------------------------------------------------------------------------|-------|
| Injection Speed*Viscosity*Screw speed                                                  |       |
| 6.44                                                                                   |       |
| Injection pressure*Melting temperature*Viscosity                                       |       |
| 16.92                                                                                  |       |
| Injection pressure*Melting temperature*Screw speed                                     |       |
| 14.91                                                                                  |       |
| Injection pressure*Viscosity*Screw speed                                               |       |
| 32.38                                                                                  |       |
| Melting temperature*Viscosity*Screw speed                                              |       |
| 4.57                                                                                   |       |
| 4-Way Interactions                                                                     |       |
| 1440.69                                                                                |       |
| Flow rate*Injection Speed*Injection pressure*Melting temperature                       |       |
| 8.26                                                                                   |       |
| Flow rate*Injection Speed*Injection pressure*Viscosity                                 |       |
| 19.35                                                                                  |       |
| Flow rate*Injection Speed*Melting temperature*Viscosity                                |       |
| 1.72                                                                                   |       |
| Flow rate*Injection pressure*Melting temperature*Viscosity                             |       |
| 16.74                                                                                  |       |
| Flow rate*Injection Speed*Injection pressure*Screw speed                               |       |
| 12.24                                                                                  |       |
| Flow rate*Injection Speed*Melting temperature*Screw speed                              |       |
| 2.09                                                                                   |       |
| Flow rate*Injection pressure*Melting temperature*Screw speed                           |       |
| 14.87                                                                                  |       |
| Flow rate*Injection Speed*Viscosity*Screw speed                                        |       |
| 6.39                                                                                   |       |
| Flow rate*Injection pressure*Viscosity*Screw speed                                     |       |
| 32.24                                                                                  |       |
| Flow rate*Melting temperature*Viscosity*Screw speed                                    |       |
| 4.48                                                                                   |       |
| Injection Speed*Injection pressure*Melting temperature*Viscosity                       |       |
| 22.33                                                                                  |       |
| Injection Speed*Injection pressure*Melting temperature*Screw speed                     |       |
| 16.24                                                                                  |       |
| Injection Speed*Injection pressure*Viscosity*Screw speed                               |       |
| 32.29                                                                                  |       |
| Injection Speed*Melting temperature*Viscosity*Screw speed                              |       |
| 8.02                                                                                   |       |
| Injection pressure*Melting temperature*Viscosity*Screw speed                           |       |
| 39.90                                                                                  |       |
| 5-Way Interactions                                                                     |       |
| 461.98                                                                                 |       |
| Flow rate*Injection Speed*Injection pressure*Melting temperature*Viscosity             |       |
| 22.15                                                                                  |       |
| Flow rate*Injection Speed*Injection pressure*Melting temperature*Screw speed           |       |
| 16.22                                                                                  |       |
| Flow rate*Injection Speed*Injection pressure*Viscosity*Screw speed                     |       |
| 32.15                                                                                  |       |
| Flow rate*Injection Speed*Melting temperature*Viscosity*Screw speed                    |       |
| 7.95                                                                                   |       |
| Flow rate*Injection pressure*Melting temperature*Viscosity*Screw speed                 |       |
| 39.66                                                                                  |       |
| Injection Speed*Injection pressure*Melting temperature*Viscosity*Screw speed           |       |
| 39.50                                                                                  |       |
| 6-Way Interactions                                                                     |       |
| 39.28                                                                                  |       |
| Flow rate*Injection Speed*Injection pressure*Melting temperature*Viscosity*Screw speed | 39.28 |
| Residual Error                                                                         |       |
| 321.31                                                                                 |       |
| Total                                                                                  |       |

Source  
 Adj MS  
 Main Effects  
 63.7277  
     Flow rate  
 0.7346  
     Injection Speed  
 0.0331  
     Injection pressure  
 3.4247  
     Melting temperature  
 0.4962  
     Viscosity  
 0.0634  
     Screw speed  
 0.3385  
 2-Way Interactions  
 86.8390  
     Flow rate\*Injection Speed  
 0.0249  
     Flow rate\*Injection pressure  
 3.3563  
     Flow rate\*Melting temperature  
 0.5388  
     Flow rate\*Viscosity  
 0.0479  
     Flow rate\*Screw speed  
 0.3228  
     Injection Speed\*Injection pressure  
 6.7135  
     Injection Speed\*Melting temperature  
 0.0984  
     Injection Speed\*Viscosity  
 1.4086  
     Injection Speed\*Screw speed  
 1.5167  
     Injection pressure\*Melting temperature  
 4.6249  
     Injection pressure\*Viscosity  
 14.4465  
     Injection pressure\*Screw speed  
 11.1991  
     Melting temperature\*Viscosity  
 0.1647  
     Melting temperature\*Screw speed  
 0.5839  
     Viscosity\*Screw speed  
 3.5375  
 3-Way Interactions  
 89.9543  
     Flow rate\*Injection Speed\*Injection pressure  
 6.6311  
     Flow rate\*Injection Speed\*Melting temperature  
 0.0831  
     Flow rate\*Injection pressure\*Melting temperature  
 4.5407  
     Flow rate\*Injection Speed\*Viscosity  
 1.3425  
     Flow rate\*Injection pressure\*Viscosity  
 14.2906  
     Flow rate\*Melting temperature\*Viscosity  
 0.1381

Flow rate\*Injection Speed\*Screw speed  
 1.4988  
 Flow rate\*Injection pressure\*Screw speed  
 11.1850  
 Flow rate\*Melting temperature\*Screw speed  
 0.5613  
 Flow rate\*Viscosity\*Screw speed  
 3.4671  
 Injection Speed\*Injection pressure\*Melting temperature  
 8.3528  
 Injection Speed\*Injection pressure\*Viscosity  
 19.5032  
 Injection Speed\*Melting temperature\*Viscosity  
 1.8019  
 Injection Speed\*Injection pressure\*Screw speed  
 12.2455  
 Injection Speed\*Melting temperature\*Screw speed  
 2.1175  
 Injection Speed\*Viscosity\*Screw speed  
 6.4399  
 Injection pressure\*Melting temperature\*Viscosity  
 16.9222  
 Injection pressure\*Melting temperature\*Screw speed  
 14.9053  
 Injection pressure\*Viscosity\*Screw speed  
 32.3822  
 Melting temperature\*Viscosity\*Screw speed  
 4.5721  
 4-Way Interactions  
 96.0460  
 Flow rate\*Injection Speed\*Injection pressure\*Melting temperature  
 8.2551  
 Flow rate\*Injection Speed\*Injection pressure\*Viscosity  
 19.3464  
 Flow rate\*Injection Speed\*Melting temperature\*Viscosity  
 1.7242  
 Flow rate\*Injection pressure\*Melting temperature\*Viscosity  
 16.7434  
 Flow rate\*Injection Speed\*Injection pressure\*Screw speed  
 12.2438  
 Flow rate\*Injection Speed\*Melting temperature\*Screw speed  
 2.0933  
 Flow rate\*Injection pressure\*Melting temperature\*Screw speed  
 14.8684  
 Flow rate\*Injection Speed\*Viscosity\*Screw speed  
 6.3855  
 Flow rate\*Injection pressure\*Viscosity\*Screw speed  
 32.2357  
 Flow rate\*Melting temperature\*Viscosity\*Screw speed  
 4.4830  
 Injection Speed\*Injection pressure\*Melting temperature\*Viscosity  
 22.3256  
 Injection Speed\*Injection pressure\*Melting temperature\*Screw speed  
 16.2398  
 Injection Speed\*Injection pressure\*Viscosity\*Screw speed  
 32.2884  
 Injection Speed\*Melting temperature\*Viscosity\*Screw speed  
 8.0221  
 Injection pressure\*Melting temperature\*Viscosity\*Screw speed  
 39.8951  
 5-Way Interactions  
 76.9969

Flow rate\*Injection Speed\*Injection pressure\*Melting temperature\*Viscosity  
22.1465  
Flow rate\*Injection Speed\*Injection pressure\*Melting temperature\*Screw speed  
16.2157  
Flow rate\*Injection Speed\*Injection pressure\*Viscosity\*Screw speed  
32.1510  
Flow rate\*Injection Speed\*Melting temperature\*Viscosity\*Screw speed  
7.9504  
Flow rate\*Injection pressure\*Melting temperature\*Viscosity\*Screw speed  
39.6637  
Injection Speed\*Injection pressure\*Melting temperature\*Viscosity\*Screw speed  
39.5016  
6-Way Interactions  
39.2804  
Flow rate\*Injection Speed\*Injection pressure\*Melting  
temperature\*Viscosity\*Screw speed 39.2804  
Residual Error  
35.7014  
Total

Source

F

Main Effects

1.79

Flow rate

0.02

Injection Speed

0.00

Injection pressure

0.10

Melting temperature

0.01

Viscosity

0.00

Screw speed

0.01

2-Way Interactions

2.43

Flow rate\*Injection Speed

0.00

Flow rate\*Injection pressure

0.09

Flow rate\*Melting temperature

0.02

Flow rate\*Viscosity

0.00

Flow rate\*Screw speed

0.01

Injection Speed\*Injection pressure

0.19

Injection Speed\*Melting temperature

0.00

Injection Speed\*Viscosity

0.04

Injection Speed\*Screw speed

0.04

Injection pressure\*Melting temperature

0.13

Injection pressure\*Viscosity

0.40

Injection pressure\*Screw speed

0.31



Melting temperature\*Viscosity  
 0.00  
 Melting temperature\*Screw speed  
 0.02  
 Viscosity\*Screw speed  
 0.10  
 3-Way Interactions  
 2.52  
 Flow rate\*Injection Speed\*Injection pressure  
 0.19  
 Flow rate\*Injection Speed\*Melting temperature  
 0.00  
 Flow rate\*Injection pressure\*Melting temperature  
 0.13  
 Flow rate\*Injection Speed\*Viscosity  
 0.04  
 Flow rate\*Injection pressure\*Viscosity  
 0.40  
 Flow rate\*Melting temperature\*Viscosity  
 0.00  
 Flow rate\*Injection Speed\*Screw speed  
 0.04  
 Flow rate\*Injection pressure\*Screw speed  
 0.31  
 Flow rate\*Melting temperature\*Screw speed  
 0.02  
 Flow rate\*Viscosity\*Screw speed  
 0.10  
 Injection Speed\*Injection pressure\*Melting temperature  
 0.23  
 Injection Speed\*Injection pressure\*Viscosity  
 0.55  
 Injection Speed\*Melting temperature\*Viscosity  
 0.05  
 Injection Speed\*Injection pressure\*Screw speed  
 0.34  
 Injection Speed\*Melting temperature\*Screw speed  
 0.06  
 Injection Speed\*Viscosity\*Screw speed  
 0.18  
 Injection pressure\*Melting temperature\*Viscosity  
 0.47  
 Injection pressure\*Melting temperature\*Screw speed  
 0.42  
 Injection pressure\*Viscosity\*Screw speed  
 0.91  
 Melting temperature\*Viscosity\*Screw speed  
 0.13  
 4-Way Interactions  
 2.69  
 Flow rate\*Injection Speed\*Injection pressure\*Melting temperature  
 0.23  
 Flow rate\*Injection Speed\*Injection pressure\*Viscosity  
 0.54  
 Flow rate\*Injection Speed\*Melting temperature\*Viscosity  
 0.05  
 Flow rate\*Injection pressure\*Melting temperature\*Viscosity  
 0.47  
 Flow rate\*Injection Speed\*Injection pressure\*Screw speed  
 0.34  
 Flow rate\*Injection Speed\*Melting temperature\*Screw speed  
 0.06

|       |                                                                                        |      |
|-------|----------------------------------------------------------------------------------------|------|
|       | Flow rate*Injection pressure*Melting temperature*Screw speed                           |      |
| 0.42  |                                                                                        |      |
|       | Flow rate*Injection Speed*Viscosity*Screw speed                                        |      |
| 0.18  |                                                                                        |      |
|       | Flow rate*Injection pressure*Viscosity*Screw speed                                     |      |
| 0.90  |                                                                                        |      |
|       | Flow rate*Melting temperature*Viscosity*Screw speed                                    |      |
| 0.13  |                                                                                        |      |
|       | Injection Speed*Injection pressure*Melting temperature*Viscosity                       |      |
| 0.63  |                                                                                        |      |
|       | Injection Speed*Injection pressure*Melting temperature*Screw speed                     |      |
| 0.45  |                                                                                        |      |
|       | Injection Speed*Injection pressure*Viscosity*Screw speed                               |      |
| 0.90  |                                                                                        |      |
|       | Injection Speed*Melting temperature*Viscosity*Screw speed                              |      |
| 0.22  |                                                                                        |      |
|       | Injection pressure*Melting temperature*Viscosity*Screw speed                           |      |
| 1.12  |                                                                                        |      |
|       | 5-Way Interactions                                                                     |      |
| 2.16  |                                                                                        |      |
|       | Flow rate*Injection Speed*Injection pressure*Melting temperature*Viscosity             |      |
| 0.62  |                                                                                        |      |
|       | Flow rate*Injection Speed*Injection pressure*Melting temperature*Screw speed           |      |
| 0.45  |                                                                                        |      |
|       | Flow rate*Injection Speed*Injection pressure*Viscosity*Screw speed                     |      |
| 0.90  |                                                                                        |      |
|       | Flow rate*Injection Speed*Melting temperature*Viscosity*Screw speed                    |      |
| 0.22  |                                                                                        |      |
|       | Flow rate*Injection pressure*Melting temperature*Viscosity*Screw speed                 |      |
| 1.11  |                                                                                        |      |
|       | Injection Speed*Injection pressure*Melting temperature*Viscosity*Screw speed           |      |
| 1.11  |                                                                                        |      |
|       | 6-Way Interactions                                                                     |      |
| 1.10  |                                                                                        |      |
|       | Flow rate*Injection Speed*Injection pressure*Melting temperature*Viscosity*Screw speed | 1.10 |
|       | Residual Error                                                                         |      |
|       | Total                                                                                  |      |
|       | Source                                                                                 |      |
|       | P                                                                                      |      |
|       | Main Effects                                                                           |      |
| 0.209 |                                                                                        |      |
|       | Flow rate                                                                              |      |
| 0.889 |                                                                                        |      |
|       | Injection Speed                                                                        |      |
| 0.976 |                                                                                        |      |
|       | Injection pressure                                                                     |      |
| 0.764 |                                                                                        |      |
|       | Melting temperature                                                                    |      |
| 0.909 |                                                                                        |      |
|       | Viscosity                                                                              |      |
| 0.967 |                                                                                        |      |
|       | Screw speed                                                                            |      |
| 0.925 |                                                                                        |      |
|       | 2-Way Interactions                                                                     |      |
| 0.090 |                                                                                        |      |
|       | Flow rate*Injection Speed                                                              |      |
| 0.980 |                                                                                        |      |
|       | Flow rate*Injection pressure                                                           |      |
| 0.766 |                                                                                        |      |
|       | Flow rate*Melting temperature                                                          |      |
| 0.905 |                                                                                        |      |

Flow rate\*Viscosity  
 0.972  
 Flow rate\*Screw speed  
 0.926  
 Injection Speed\*Injection pressure  
 0.675  
 Injection Speed\*Melting temperature  
 0.959  
 Injection Speed\*Viscosity  
 0.847  
 Injection Speed\*Screw speed  
 0.841  
 Injection pressure\*Melting temperature  
 0.727  
 Injection pressure\*Viscosity  
 0.541  
 Injection pressure\*Screw speed  
 0.589  
 Melting temperature\*Viscosity  
 0.947  
 Melting temperature\*Screw speed  
 0.901  
 Viscosity\*Screw speed  
 0.760  
 3-Way Interactions  
 0.078  
 Flow rate\*Injection Speed\*Injection pressure  
 0.677  
 Flow rate\*Injection Speed\*Melting temperature  
 0.963  
 Flow rate\*Injection pressure\*Melting temperature  
 0.730  
 Flow rate\*Injection Speed\*Viscosity  
 0.851  
 Flow rate\*Injection pressure\*Viscosity  
 0.543  
 Flow rate\*Melting temperature\*Viscosity  
 0.952  
 Flow rate\*Injection Speed\*Screw speed  
 0.842  
 Flow rate\*Injection pressure\*Screw speed  
 0.589  
 Flow rate\*Melting temperature\*Screw speed  
 0.903  
 Flow rate\*Viscosity\*Screw speed  
 0.762  
 Injection Speed\*Injection pressure\*Melting temperature  
 0.640  
 Injection Speed\*Injection pressure\*Viscosity  
 0.479  
 Injection Speed\*Melting temperature\*Viscosity  
 0.827  
 Injection Speed\*Injection pressure\*Screw speed  
 0.572  
 Injection Speed\*Melting temperature\*Screw speed  
 0.813  
 Injection Speed\*Viscosity\*Screw speed  
 0.681  
 Injection pressure\*Melting temperature\*Viscosity  
 0.509  
 Injection pressure\*Melting temperature\*Screw speed  
 0.534

```

Injection pressure*Viscosity*Screw speed
0.366
Melting temperature*Viscosity*Screw speed
0.729
4-Way Interactions
0.069
Flow rate*Injection Speed*Injection pressure*Melting temperature
0.642
Flow rate*Injection Speed*Injection pressure*Viscosity
0.480
Flow rate*Injection Speed*Melting temperature*Viscosity
0.831
Flow rate*Injection pressure*Melting temperature*Viscosity
0.511
Flow rate*Injection Speed*Injection pressure*Screw speed
0.573
Flow rate*Injection Speed*Melting temperature*Screw speed
0.814
Flow rate*Injection pressure*Melting temperature*Screw speed
0.535
Flow rate*Injection Speed*Viscosity*Screw speed
0.682
Flow rate*Injection pressure*Viscosity*Screw speed
0.367
Flow rate*Melting temperature*Viscosity*Screw speed
0.731
Injection Speed*Injection pressure*Melting temperature*Viscosity
0.449
Injection Speed*Injection pressure*Melting temperature*Screw speed
0.517
Injection Speed*Injection pressure*Viscosity*Screw speed
0.366
Injection Speed*Melting temperature*Viscosity*Screw speed
0.647
Injection pressure*Melting temperature*Viscosity*Screw speed
0.318
5-Way Interactions
0.144
Flow rate*Injection Speed*Injection pressure*Melting temperature*Viscosity
0.451
Flow rate*Injection Speed*Injection pressure*Melting temperature*Screw speed
0.517
Flow rate*Injection Speed*Injection pressure*Viscosity*Screw speed
0.367
Flow rate*Injection Speed*Melting temperature*Viscosity*Screw speed
0.648
Flow rate*Injection pressure*Melting temperature*Viscosity*Screw speed
0.319
Injection Speed*Injection pressure*Melting temperature*Viscosity*Screw speed
0.320
6-Way Interactions
0.322
Flow rate*Injection Speed*Injection pressure*Melting
temperature*Viscosity*Screw speed 0.322
Residual Error
Total

```

#### Unusual Observations for Bubbles

| Obs | StdOrder | Bubbles | Fit     | SE Fit | Residual | St Resid |
|-----|----------|---------|---------|--------|----------|----------|
| 1   | 1        | 12.0000 | 12.0689 | 5.9749 | -0.0689  | -1.60 X  |
| 2   | 2        | 7.0000  | 7.1238  | 5.9457 | -0.1238  | -0.21 X  |

|    |    |         |         |        |         |         |
|----|----|---------|---------|--------|---------|---------|
| 4  | 4  | 18.0000 | 17.7294 | 5.9676 | 0.2706  | 0.90 X  |
| 5  | 5  | 36.0000 | 36.0631 | 5.9715 | -0.0631 | -0.31 X |
| 7  | 7  | 61.0000 | 61.2714 | 5.9624 | -0.2714 | -0.70 X |
| 19 | 19 | 14.0000 | 13.8145 | 5.9641 | 0.1855  | 0.51 X  |
| 38 | 38 | 6.0000  | 6.2876  | 5.9664 | -0.2876 | -0.89 X |
| 56 | 56 | 14.0000 | 14.1289 | 5.9640 | -0.1289 | -0.35 X |
| 57 | 57 | 25.0000 | 25.0907 | 5.9622 | -0.0907 | -0.23 X |
| 58 | 58 | 24.0000 | 24.1095 | 5.9712 | -0.1095 | -0.51 X |
| 59 | 59 | 54.0000 | 55.0375 | 5.9470 | -1.0375 | -1.79 X |
| 60 | 60 | 12.0000 | 11.9197 | 5.9746 | 0.0803  | 1.05 X  |
| 61 | 61 | 19.0000 | 18.8777 | 5.9735 | 0.1223  | 0.88 X  |
| 62 | 62 | 25.5000 | 26.1653 | 5.9539 | -0.6653 | -1.32 X |
| 63 | 63 | 25.8000 | 25.6073 | 5.9728 | 0.1927  | 1.18 X  |
| 68 | 68 | 3.0000  | 2.3392  | 5.9656 | 0.6608  | 1.97 X  |
| 69 | 69 | 2.0000  | 2.4124  | 5.9692 | -0.4124 | -1.56 X |
| 70 | 70 | 15.0000 | 14.8044 | 5.9726 | 0.1956  | 1.14 X  |
| 71 | 71 | 3.0000  | 2.5089  | 5.9708 | 0.4911  | 2.18RX  |
| 72 | 72 | 13.0000 | 13.2481 | 5.9594 | -0.2481 | -0.57 X |
| 73 | 73 | 8.4286  | 8.4776  | 5.9748 | -0.0490 | -0.95 X |

R denotes an observation with a large standardized residual.  
X denotes an observation whose X value gives it large leverage.

Estimated Coefficients for Bubbles using data in uncoded units

| Term                                                 | Coef     |
|------------------------------------------------------|----------|
| Constant                                             | 1087013  |
| Flow rate                                            | -679531  |
| Injection Speed                                      | -55903.4 |
| Injection pressure                                   | -30482.3 |
| Melting temperature                                  | -4805.48 |
| Viscosity                                            | -480293  |
| Screw speed                                          | -51863   |
| Flow rate*Injection Speed                            | 31247.4  |
| Flow rate*Injection pressure                         | 14040.0  |
| Flow rate*Melting temperature                        | 3023.52  |
| Flow rate*Viscosity                                  | 235659   |
| Flow rate*Screw speed                                | 59997.0  |
| Injection Speed*Injection pressure                   | 1333.76  |
| Injection Speed*Melting temperature                  | 248.483  |
| Injection Speed*Viscosity                            | 26894.7  |
| Injection Speed*Screw speed                          | 3160.95  |
| Injection pressure*<br>Melting temperature           | 134.984  |
| Injection pressure*Viscosity                         | 13587.0  |
| Injection pressure*Screw speed                       | 2523.27  |
| Melting temperature*Viscosity                        | 2122.84  |
| Melting temperature*Screw speed                      | 232.030  |
| Viscosity*Screw speed                                | 3055.5   |
| Flow rate*Injection Speed*<br>Injection pressure     | -603.691 |
| Flow rate*Injection Speed*<br>Melting temperature    | -139.633 |
| Flow rate*Injection pressure*<br>Melting temperature | -62.6456 |
| Flow rate*Injection Speed*Viscosity                  | -11073.3 |
| Flow rate*Injection pressure*<br>Viscosity           | -5188.71 |
| Flow rate*Melting temperature*<br>Viscosity          | -1063.97 |
| Flow rate*Injection Speed*<br>Screw speed            | -2909.95 |

|                                      |           |
|--------------------------------------|-----------|
| Flow rate*Injection pressure*        | -1403.87  |
| Screw speed                          |           |
| Flow rate*Melting temperature*       | -266.186  |
| Screw speed                          |           |
| Flow rate*Viscosity*Screw speed      | -14581.0  |
| Injection Speed*Injection pressure*  | -5.94377  |
| Melting temperature                  |           |
| Injection Speed*Injection pressure*  | -596.81   |
| Viscosity                            |           |
| Injection Speed*Melting temperature* | -119.761  |
| Viscosity                            |           |
| Injection Speed*Injection pressure*  | -114.431  |
| Screw speed                          |           |
| Injection Speed*Melting temperature* | -14.1078  |
| Screw speed                          |           |
| Injection Speed*Viscosity*           | -799.14   |
| Screw speed                          |           |
| Injection pressure*                  | -60.4542  |
| Melting temperature*Viscosity        |           |
| Injection pressure*                  | -11.1278  |
| Melting temperature*Screw speed      |           |
| Injection pressure*Viscosity*        | -845.27   |
| Screw speed                          |           |
| Melting temperature*Viscosity*       | -18.579   |
| Screw speed                          |           |
| Flow rate*Injection Speed*           | 2.70807   |
| Injection pressure*                  |           |
| Melting temperature                  |           |
| Flow rate*Injection Speed*           | 214.345   |
| Injection pressure*Viscosity         |           |
| Flow rate*Injection Speed*           | 50.4216   |
| Melting temperature*Viscosity        |           |
| Flow rate*Injection pressure*        | 23.5212   |
| Melting temperature*Viscosity        |           |
| Flow rate*Injection Speed*           | 63.1461   |
| Injection pressure*Screw speed       |           |
| Flow rate*Injection Speed*           | 12.9078   |
| Melting temperature*Screw speed      |           |
| Flow rate*Injection pressure*        | 6.21556   |
| Melting temperature*Screw speed      |           |
| Flow rate*Injection Speed*Viscosity* | 831.69    |
| Screw speed                          |           |
| Flow rate*Injection pressure*        | 444.595   |
| Viscosity*Screw speed                |           |
| Flow rate*Melting temperature*       | 67.374    |
| Viscosity*Screw speed                |           |
| Injection Speed*Injection pressure*  | 2.68018   |
| Melting temperature*Viscosity        |           |
| Injection Speed*Injection pressure*  | 0.506340  |
| Melting temperature*Screw speed      |           |
| Injection Speed*Injection pressure*  | 40.4386   |
| Viscosity*Screw speed                |           |
| Injection Speed*Melting temperature* | 3.7533    |
| Viscosity*Screw speed                |           |
| Injection pressure*                  | 3.80000   |
| Melting temperature*Viscosity*       |           |
| Screw speed                          |           |
| Flow rate*Injection Speed*           | -0.98357  |
| Injection pressure*                  |           |
| Melting temperature*Viscosity        |           |
| Flow rate*Injection Speed*           | -0.279989 |
| Injection pressure*                  |           |
| Melting temperature*Screw speed      |           |

|                                     |           |
|-------------------------------------|-----------|
| Flow rate*Injection Speed*          | -20.4577  |
| Injection pressure*Viscosity*       |           |
| Screw speed                         |           |
| Flow rate*Injection Speed*          | -3.80623  |
| Melting temperature*Viscosity*      |           |
| Screw speed                         |           |
| Flow rate*Injection pressure*       | -2.01462  |
| Melting temperature*Viscosity*      |           |
| Screw speed                         |           |
| Injection Speed*Injection pressure* | -0.182488 |
| Melting temperature*Viscosity*      |           |
| Screw speed                         |           |
| Flow rate*Injection Speed*          | 0.0929005 |
| Injection pressure*                 |           |
| Melting temperature*Viscosity*      |           |
| Screw speed                         |           |

## Effects Pareto for Bubbles

\* NOTE \* Some factors have more than 2 levels, no alias table was printed.

## Factorial Fit: Hard fitting versus Flow rate, Injection Speed, ...

\* NOTE \* This design has some botched runs. It will be analyzed using a regression approach.

Estimated Effects and Coefficients for Hard fitting (coded units)

| Term                                | Effect     | Coef      | SE Coef   | T     |
|-------------------------------------|------------|-----------|-----------|-------|
| Constant                            |            | 676089693 | 289352422 | 2.34  |
| Flow rate                           | 820447079  | 410223540 | 175454492 | 2.34  |
| Injection Speed                     | -16696764  | -8348382  | 3668298   | -2.28 |
| Injection pressure                  | -59558319  | -29779160 | 17443213  | -1.71 |
| Melting temperature                 | -49972005  | -24986002 | 10351772  | -2.41 |
| Viscosity                           | 675659242  | 337829621 | 131915266 | 2.56  |
| Screw speed                         | 1429652426 | 714826213 | 461355969 | 1.55  |
| Flow rate*Injection Speed           | -10132996  | -5066498  | 2223851   | -2.28 |
| Flow rate*Injection pressure        | -36136329  | -18068164 | 10577666  | -1.71 |
| Flow rate*Melting temperature       | -30321316  | -15160658 | 6277305   | -2.42 |
| Flow rate*Viscosity                 | 409924232  | 204962116 | 79963914  | 2.56  |
| Flow rate*Screw speed               | 869901501  | 434950751 | 279523131 | 1.56  |
| Injection Speed*Injection pressure  | 742234     | 371117    | 219845    | 1.69  |
| Injection Speed*Melting temperature | 616778     | 308389    | 131051    | 2.35  |
| Injection Speed*Viscosity           | -8320819   | -4160409  | 1670938   | -2.49 |
| Injection Speed*Screw speed         | -18561847  | -9280923  | 5648837   | -1.64 |
| Injection pressure*                 | 2209167    | 1104583   | 626021    | 1.76  |
| Melting temperature                 |            |           |           |       |
| Injection pressure*Viscosity        | -29928977  | -14964489 | 8146637   | -1.84 |
| Injection pressure*Screw speed      | 29410841   | 14705421  | 27613086  | 0.53  |
| Melting temperature*Viscosity       | -24955148  | -12477574 | 4749073   | -2.63 |
| Melting temperature*Screw speed     | -56474167  | -28237083 | 16366293  | -1.73 |
| Viscosity*Screw speed               | 744345049  | 372172525 | 187771385 | 1.98  |
| Flow rate*Injection Speed*          | 450449     | 225224    | 133269    | 1.69  |
| Injection pressure                  |            |           |           |       |
| Flow rate*Injection Speed*          | 374316     | 187158    | 79452     | 2.36  |
| Melting temperature                 |            |           |           |       |
| Flow rate*Injection pressure*       | 1340396    | 670198    | 379658    | 1.77  |

|                                      |           |           |           |       |
|--------------------------------------|-----------|-----------|-----------|-------|
| Melting temperature                  |           |           |           |       |
| Flow rate*Injection Speed*Viscosity  | -5049173  | -2524586  | 1012676   | -2.49 |
| Flow rate*Injection pressure*        | -18156712 | -9078356  | 4940199   | -1.84 |
| Viscosity                            |           |           |           |       |
| Flow rate*Melting temperature*       | -15140482 | -7570241  | 2878899   | -2.63 |
| Viscosity                            |           |           |           |       |
| Flow rate*Injection Speed*           | -11295556 | -5647778  | 3421446   | -1.65 |
| Screw speed                          |           |           |           |       |
| Flow rate*Injection pressure*        | 17809250  | 8904625   | 16757310  | 0.53  |
| Screw speed                          |           |           |           |       |
| Flow rate*Melting temperature*       | -34358022 | -17179011 | 9919188   | -1.73 |
| Screw speed                          |           |           |           |       |
| Flow rate*Viscosity*Screw speed      | 452712825 | 226356412 | 113737359 | 1.99  |
| Injection Speed*Injection pressure*  | -27529    | -13765    | 7879      | -1.75 |
| Melting temperature                  |           |           |           |       |
| Injection Speed*Injection pressure*  | 371150    | 185575    | 102187    | 1.82  |
| Viscosity                            |           |           |           |       |
| Injection Speed*Melting temperature* | 307230    | 153615    | 60039     | 2.56  |
| Viscosity                            |           |           |           |       |
| Injection Speed*Injection pressure*  | -206095   | -103047   | 335853    | -0.31 |
| Screw speed                          |           |           |           |       |
| Injection Speed*Melting temperature* | 727162    | 363581    | 200264    | 1.82  |
| Screw speed                          |           |           |           |       |
| Injection Speed*Viscosity*           | -9593946  | -4796973  | 2337690   | -2.05 |
| Screw speed                          |           |           |           |       |
| Injection pressure*                  | 1109045   | 554523    | 295070    | 1.88  |
| Melting temperature*Viscosity        |           |           |           |       |
| Injection pressure*                  | -800656   | -400328   | 964896    | -0.41 |
| Melting temperature*Screw speed      |           |           |           |       |
| Injection pressure*Viscosity*        | 9811125   | 4905563   | 11910879  | 0.41  |
| Screw speed                          |           |           |           |       |
| Melting temperature*Viscosity*       | -29121127 | -14560563 | 6686824   | -2.18 |
| Screw speed                          |           |           |           |       |
| Flow rate*Injection Speed*           | -16707    | -8353     | 4777      | -1.75 |
| Injection pressure*                  |           |           |           |       |
| Melting temperature                  |           |           |           |       |
| Flow rate*Injection Speed*           | 225206    | 112603    | 61949     | 1.82  |
| Injection pressure*Viscosity         |           |           |           |       |
| Flow rate*Injection Speed*           | 186432    | 93216     | 36389     | 2.56  |
| Melting temperature*Viscosity        |           |           |           |       |
| Flow rate*Injection pressure*        | 672815    | 336407    | 178949    | 1.88  |
| Melting temperature*Viscosity        |           |           |           |       |
| Flow rate*Injection Speed*           | -124354   | -62177    | 203839    | -0.31 |
| Injection pressure*Screw speed       |           |           |           |       |
| Flow rate*Injection Speed*           | 442445    | 221222    | 121340    | 1.82  |
| Melting temperature*Screw speed      |           |           |           |       |
| Flow rate*Injection pressure*        | -484310   | -242155   | 585821    | -0.41 |
| Melting temperature*Screw speed      |           |           |           |       |
| Flow rate*Injection Speed*Viscosity* | -5835617  | -2917809  | 1415484   | -2.06 |
| Screw speed                          |           |           |           |       |
| Flow rate*Injection pressure*        | 5945009   | 2972504   | 7236644   | 0.41  |
| Viscosity*Screw speed                |           |           |           |       |
| Flow rate*Melting temperature*       | -17709944 | -8854972  | 4052094   | -2.19 |
| Viscosity*Screw speed                |           |           |           |       |
| Injection Speed*Injection pressure*  | -13756    | -6878     | 3695      | -1.86 |
| Melting temperature*Viscosity        |           |           |           |       |
| Injection Speed*Injection pressure*  | 4332      | 2166      | 11785     | 0.18  |
| Melting temperature*Screw speed      |           |           |           |       |
| Injection Speed*Injection pressure*  | -49104    | -24552    | 147934    | -0.17 |
| Viscosity*Screw speed                |           |           |           |       |
| Injection Speed*Melting temperature* | 372822    | 186411    | 83221     | 2.24  |
| Viscosity*Screw speed                |           |           |           |       |
| Injection pressure*                  | -235229   | -117614   | 420297    | -0.28 |



|                                     |         |        |        |       |
|-------------------------------------|---------|--------|--------|-------|
| Melting temperature*Viscosity*      |         |        |        |       |
| Screw speed                         |         |        |        |       |
| Flow rate*Injection Speed*          | -8347   | -4173  | 2240   | -1.86 |
| Injection pressure*                 |         |        |        |       |
| Melting temperature*Viscosity       |         |        |        |       |
| Flow rate*Injection Speed*          | 2601    | 1301   | 7157   | 0.18  |
| Injection pressure*                 |         |        |        |       |
| Melting temperature*Screw speed     |         |        |        |       |
| Flow rate*Injection Speed*          | -29589  | -14795 | 89902  | -0.16 |
| Injection pressure*Viscosity*       |         |        |        |       |
| Screw speed                         |         |        |        |       |
| Flow rate*Injection Speed*          | 226753  | 113376 | 50413  | 2.25  |
| Melting temperature*Viscosity*      |         |        |        |       |
| Screw speed                         |         |        |        |       |
| Flow rate*Injection pressure*       | -142348 | -71174 | 255500 | -0.28 |
| Melting temperature*Viscosity*      |         |        |        |       |
| Screw speed                         |         |        |        |       |
| Injection Speed*Injection pressure* | 349     | 175    | 5254   | 0.03  |
| Melting temperature*Viscosity*      |         |        |        |       |
| Screw speed                         |         |        |        |       |
| Flow rate*Injection Speed*          | 203     | 102    | 3195   | 0.03  |
| Injection pressure*                 |         |        |        |       |
| Melting temperature*Viscosity*      |         |        |        |       |
| Screw speed                         |         |        |        |       |

|                                     |       |
|-------------------------------------|-------|
| Term                                | P     |
| Constant                            | 0.044 |
| Flow rate                           | 0.044 |
| Injection Speed                     | 0.049 |
| Injection pressure                  | 0.122 |
| Melting temperature                 | 0.039 |
| Viscosity                           | 0.031 |
| Screw speed                         | 0.156 |
| Flow rate*Injection Speed           | 0.049 |
| Flow rate*Injection pressure        | 0.122 |
| Flow rate*Melting temperature       | 0.039 |
| Flow rate*Viscosity                 | 0.031 |
| Flow rate*Screw speed               | 0.154 |
| Injection Speed*Injection pressure  | 0.126 |
| Injection Speed*Melting temperature | 0.043 |
| Injection Speed*Viscosity           | 0.034 |
| Injection Speed*Screw speed         | 0.135 |
| Injection pressure*                 | 0.111 |
| Melting temperature                 |       |
| Injection pressure*Viscosity        | 0.099 |
| Injection pressure*Screw speed      | 0.607 |
| Melting temperature*Viscosity       | 0.027 |
| Melting temperature*Screw speed     | 0.119 |
| Viscosity*Screw speed               | 0.079 |
| Flow rate*Injection Speed*          | 0.125 |
| Injection pressure                  |       |
| Flow rate*Injection Speed*          | 0.043 |
| Melting temperature                 |       |
| Flow rate*Injection pressure*       | 0.111 |
| Melting temperature                 |       |
| Flow rate*Injection Speed*Viscosity | 0.034 |
| Flow rate*Injection pressure*       | 0.099 |
| Viscosity                           |       |
| Flow rate*Melting temperature*      | 0.027 |
| Viscosity                           |       |
| Flow rate*Injection Speed*          | 0.133 |
| Screw speed                         |       |
| Flow rate*Injection pressure*       | 0.608 |

|                                      |       |
|--------------------------------------|-------|
| Screw speed                          |       |
| Flow rate*Melting temperature*       | 0.117 |
| Screw speed                          |       |
| Flow rate*Viscosity*Screw speed      | 0.078 |
| Injection Speed*Injection pressure*  | 0.115 |
| Melting temperature                  |       |
| Injection Speed*Injection pressure*  | 0.103 |
| Viscosity                            |       |
| Injection Speed*Melting temperature* | 0.031 |
| Viscosity                            |       |
| Injection Speed*Injection pressure*  | 0.766 |
| Screw speed                          |       |
| Injection Speed*Melting temperature* | 0.103 |
| Screw speed                          |       |
| Injection Speed*Viscosity*           | 0.070 |
| Screw speed                          |       |
| Injection pressure*                  | 0.093 |
| Melting temperature*Viscosity        |       |
| Injection pressure*                  | 0.688 |
| Melting temperature*Screw speed      |       |
| Injection pressure*Viscosity*        | 0.690 |
| Screw speed                          |       |
| Melting temperature*Viscosity*       | 0.057 |
| Screw speed                          |       |
| Flow rate*Injection Speed*           | 0.114 |
| Injection pressure*                  |       |
| Melting temperature                  |       |
| Flow rate*Injection Speed*           | 0.102 |
| Injection pressure*Viscosity         |       |
| Flow rate*Injection Speed*           | 0.031 |
| Melting temperature*Viscosity        |       |
| Flow rate*Injection pressure*        | 0.093 |
| Melting temperature*Viscosity        |       |
| Flow rate*Injection Speed*           | 0.767 |
| Injection pressure*Screw speed       |       |
| Flow rate*Injection Speed*           | 0.102 |
| Melting temperature*Screw speed      |       |
| Flow rate*Injection pressure*        | 0.689 |
| Melting temperature*Screw speed      |       |
| Flow rate*Injection Speed*Viscosity* | 0.069 |
| Screw speed                          |       |
| Flow rate*Injection pressure*        | 0.691 |
| Viscosity*Screw speed                |       |
| Flow rate*Melting temperature*       | 0.057 |
| Viscosity*Screw speed                |       |
| Injection Speed*Injection pressure*  | 0.096 |
| Melting temperature*Viscosity        |       |
| Injection Speed*Injection pressure*  | 0.858 |
| Melting temperature*Screw speed      |       |
| Injection Speed*Injection pressure*  | 0.872 |
| Viscosity*Screw speed                |       |
| Injection Speed*Melting temperature* | 0.052 |
| Viscosity*Screw speed                |       |
| Injection pressure*                  | 0.786 |
| Melting temperature*Viscosity*       |       |
| Screw speed                          |       |
| Flow rate*Injection Speed*           | 0.095 |
| Injection pressure*                  |       |
| Melting temperature*Viscosity        |       |
| Flow rate*Injection Speed*           | 0.860 |
| Injection pressure*                  |       |
| Melting temperature*Screw speed      |       |
| Flow rate*Injection Speed*           | 0.873 |

|                                     |       |
|-------------------------------------|-------|
| Injection pressure*Viscosity*       |       |
| Screw speed                         |       |
| Flow rate*Injection Speed*          | 0.051 |
| Melting temperature*Viscosity*      |       |
| Screw speed                         |       |
| Flow rate*Injection pressure*       | 0.787 |
| Melting temperature*Viscosity*      |       |
| Screw speed                         |       |
| Injection Speed*Injection pressure* | 0.974 |
| Melting temperature*Viscosity*      |       |
| Screw speed                         |       |
| Flow rate*Injection Speed*          | 0.975 |
| Injection pressure*                 |       |
| Melting temperature*Viscosity*      |       |
| Screw speed                         |       |

S = 5.36548      PRESS = 3048194  
 R-Sq = 89.30%    R-Sq(pred) = 0.00%    R-Sq(adj) = 14.40%

#### Analysis of Variance for Hard fitting (coded units)

|                                        |  |
|----------------------------------------|--|
| Source                                 |  |
| DF                                     |  |
| Main Effects                           |  |
| 6                                      |  |
| Flow rate                              |  |
| 1                                      |  |
| Injection Speed                        |  |
| 1                                      |  |
| Injection pressure                     |  |
| 1                                      |  |
| Melting temperature                    |  |
| 1                                      |  |
| Viscosity                              |  |
| 1                                      |  |
| Screw speed                            |  |
| 1                                      |  |
| 2-Way Interactions                     |  |
| 15                                     |  |
| Flow rate*Injection Speed              |  |
| 1                                      |  |
| Flow rate*Injection pressure           |  |
| 1                                      |  |
| Flow rate*Melting temperature          |  |
| 1                                      |  |
| Flow rate*Viscosity                    |  |
| 1                                      |  |
| Flow rate*Screw speed                  |  |
| 1                                      |  |
| Injection Speed*Injection pressure     |  |
| 1                                      |  |
| Injection Speed*Melting temperature    |  |
| 1                                      |  |
| Injection Speed*Viscosity              |  |
| 1                                      |  |
| Injection Speed*Screw speed            |  |
| 1                                      |  |
| Injection pressure*Melting temperature |  |
| 1                                      |  |
| Injection pressure*Viscosity           |  |
| 1                                      |  |

```

Injection pressure*Screw speed
1
Melting temperature*Viscosity
1
Melting temperature*Screw speed
1
Viscosity*Screw speed
1
3-Way Interactions
20
Flow rate*Injection Speed*Injection pressure
1
Flow rate*Injection Speed*Melting temperature
1
Flow rate*Injection pressure*Melting temperature
1
Flow rate*Injection Speed*Viscosity
1
Flow rate*Injection pressure*Viscosity
1
Flow rate*Melting temperature*Viscosity
1
Flow rate*Injection Speed*Screw speed
1
Flow rate*Injection pressure*Screw speed
1
Flow rate*Melting temperature*Screw speed
1
Flow rate*Viscosity*Screw speed
1
Injection Speed*Injection pressure*Melting temperature
1
Injection Speed*Injection pressure*Viscosity
1
Injection Speed*Melting temperature*Viscosity
1
Injection Speed*Injection pressure*Screw speed
1
Injection Speed*Melting temperature*Screw speed
1
Injection Speed*Viscosity*Screw speed
1
Injection pressure*Melting temperature*Viscosity
1
Injection pressure*Melting temperature*Screw speed
1
Injection pressure*Viscosity*Screw speed
1
Melting temperature*Viscosity*Screw speed
1
4-Way Interactions
15
Flow rate*Injection Speed*Injection pressure*Melting temperature
1
Flow rate*Injection Speed*Injection pressure*Viscosity
1
Flow rate*Injection Speed*Melting temperature*Viscosity
1
Flow rate*Injection pressure*Melting temperature*Viscosity
1
Flow rate*Injection Speed*Injection pressure*Screw speed
1

```

```

Flow rate*Injection Speed*Melting temperature*Screw speed
1
Flow rate*Injection pressure*Melting temperature*Screw speed
1
Flow rate*Injection Speed*Viscosity*Screw speed
1
Flow rate*Injection pressure*Viscosity*Screw speed
1
Flow rate*Melting temperature*Viscosity*Screw speed
1
Injection Speed*Injection pressure*Melting temperature*Viscosity
1
Injection Speed*Injection pressure*Melting temperature*Screw speed
1
Injection Speed*Injection pressure*Viscosity*Screw speed
1
Injection Speed*Melting temperature*Viscosity*Screw speed
1
Injection pressure*Melting temperature*Viscosity*Screw speed
1
5-Way Interactions
6
Flow rate*Injection Speed*Injection pressure*Melting temperature*Viscosity
1
Flow rate*Injection Speed*Injection pressure*Melting temperature*Screw speed
1
Flow rate*Injection Speed*Injection pressure*Viscosity*Screw speed
1
Flow rate*Injection Speed*Melting temperature*Viscosity*Screw speed
1
Flow rate*Injection pressure*Melting temperature*Viscosity*Screw speed
1
Injection Speed*Injection pressure*Melting temperature*Viscosity*Screw speed
1
6-Way Interactions
1
Flow rate*Injection Speed*Injection pressure*Melting
temperature*Viscosity*Screw speed 1
Residual Error
9
Total
72

Source
Seq SS
Main Effects
432.96
Flow rate
57.68
Injection Speed
126.48
Injection pressure
23.83
Melting temperature
72.99
Viscosity
1.81
Screw speed
150.18
2-Way Interactions
374.88
Flow rate*Injection Speed
12.42

```

Flow rate\*Injection pressure  
 65.46  
 Flow rate\*Melting temperature  
 3.34  
 Flow rate\*Viscosity  
 0.65  
 Flow rate\*Screw speed  
 2.13  
 Injection Speed\*Injection pressure  
 41.04  
 Injection Speed\*Melting temperature  
 3.55  
 Injection Speed\*Viscosity  
 46.88  
 Injection Speed\*Screw speed  
 97.23  
 Injection pressure\*Melting temperature  
 18.75  
 Injection pressure\*Viscosity  
 61.54  
 Injection pressure\*Screw speed  
 0.00  
 Melting temperature\*Viscosity  
 7.31  
 Melting temperature\*Screw speed  
 13.35  
 Viscosity\*Screw speed  
 1.23  
 3-Way Interactions  
 695.00  
 Flow rate\*Injection Speed\*Injection pressure  
 49.56  
 Flow rate\*Injection Speed\*Melting temperature  
 9.32  
 Flow rate\*Injection pressure\*Melting temperature  
 23.89  
 Flow rate\*Injection Speed\*Viscosity  
 31.50  
 Flow rate\*Injection pressure\*Viscosity  
 0.04  
 Flow rate\*Melting temperature\*Viscosity  
 3.27  
 Flow rate\*Injection Speed\*Screw speed  
 32.74  
 Flow rate\*Injection pressure\*Screw speed  
 29.57  
 Flow rate\*Melting temperature\*Screw speed  
 1.24  
 Flow rate\*Viscosity\*Screw speed  
 10.13  
 Injection Speed\*Injection pressure\*Melting temperature  
 2.06  
 Injection Speed\*Injection pressure\*Viscosity  
 1.22  
 Injection Speed\*Melting temperature\*Viscosity  
 109.98  
 Injection Speed\*Injection pressure\*Screw speed  
 151.73  
 Injection Speed\*Melting temperature\*Screw speed  
 28.32  
 Injection Speed\*Viscosity\*Screw speed  
 47.45

|                                                                                        |      |
|----------------------------------------------------------------------------------------|------|
| Injection pressure*Melting temperature*Viscosity                                       |      |
| 41.02                                                                                  |      |
| Injection pressure*Melting temperature*Screw speed                                     |      |
| 1.78                                                                                   |      |
| Injection pressure*Viscosity*Screw speed                                               |      |
| 119.98                                                                                 |      |
| Melting temperature*Viscosity*Screw speed                                              |      |
| 0.19                                                                                   |      |
| 4-Way Interactions                                                                     |      |
| 362.07                                                                                 |      |
| Flow rate*Injection Speed*Injection pressure*Melting temperature                       |      |
| 6.90                                                                                   |      |
| Flow rate*Injection Speed*Injection pressure*Viscosity                                 |      |
| 1.64                                                                                   |      |
| Flow rate*Injection Speed*Melting temperature*Viscosity                                |      |
| 26.42                                                                                  |      |
| Flow rate*Injection pressure*Melting temperature*Viscosity                             |      |
| 11.05                                                                                  |      |
| Flow rate*Injection Speed*Injection pressure*Screw speed                               |      |
| 14.25                                                                                  |      |
| Flow rate*Injection Speed*Melting temperature*Screw speed                              |      |
| 38.67                                                                                  |      |
| Flow rate*Injection pressure*Melting temperature*Screw speed                           |      |
| 0.08                                                                                   |      |
| Flow rate*Injection Speed*Viscosity*Screw speed                                        |      |
| 16.56                                                                                  |      |
| Flow rate*Injection pressure*Viscosity*Screw speed                                     |      |
| 1.60                                                                                   |      |
| Flow rate*Melting temperature*Viscosity*Screw speed                                    |      |
| 33.41                                                                                  |      |
| Injection Speed*Injection pressure*Melting temperature*Viscosity                       |      |
| 15.88                                                                                  |      |
| Injection Speed*Injection pressure*Melting temperature*Screw speed                     |      |
| 42.76                                                                                  |      |
| Injection Speed*Injection pressure*Viscosity*Screw speed                               |      |
| 70.29                                                                                  |      |
| Injection Speed*Melting temperature*Viscosity*Screw speed                              |      |
| 24.32                                                                                  |      |
| Injection pressure*Melting temperature*Viscosity*Screw speed                           |      |
| 58.26                                                                                  |      |
| 5-Way Interactions                                                                     |      |
| 297.47                                                                                 |      |
| Flow rate*Injection Speed*Injection pressure*Melting temperature*Viscosity             |      |
| 0.00                                                                                   |      |
| Flow rate*Injection Speed*Injection pressure*Melting temperature*Screw speed           |      |
| 0.06                                                                                   |      |
| Flow rate*Injection Speed*Injection pressure*Viscosity*Screw speed                     |      |
| 77.20                                                                                  |      |
| Flow rate*Injection Speed*Melting temperature*Viscosity*Screw speed                    |      |
| 127.49                                                                                 |      |
| Flow rate*Injection pressure*Melting temperature*Viscosity*Screw speed                 |      |
| 92.28                                                                                  |      |
| Injection Speed*Injection pressure*Melting temperature*Viscosity*Screw speed           |      |
| 0.44                                                                                   |      |
| 6-Way Interactions                                                                     |      |
| 0.03                                                                                   |      |
| Flow rate*Injection Speed*Injection pressure*Melting temperature*Viscosity*Screw speed | 0.03 |
| Residual Error                                                                         |      |
| 259.10                                                                                 |      |
| Total                                                                                  |      |
| 2421.51                                                                                |      |

Source  
 Adj SS  
 Main Effects  
 363.084  
     Flow rate  
 157.373  
     Injection Speed  
 149.105  
     Injection pressure  
 83.905  
     Melting temperature  
 167.719  
     Viscosity  
 188.809  
     Screw speed  
 69.111  
 2-Way Interactions  
 487.207  
     Flow rate\*Injection Speed  
 149.425  
     Flow rate\*Injection pressure  
 83.997  
     Flow rate\*Melting temperature  
 167.922  
     Flow rate\*Viscosity  
 189.137  
     Flow rate\*Screw speed  
 69.705  
     Injection Speed\*Injection pressure  
 82.036  
     Injection Speed\*Melting temperature  
 159.416  
     Injection Speed\*Viscosity  
 178.471  
     Injection Speed\*Screw speed  
 77.711  
     Injection pressure\*Melting temperature  
 89.626  
     Injection pressure\*Viscosity  
 97.137  
     Injection pressure\*Screw speed  
 8.165  
     Melting temperature\*Viscosity  
 198.728  
     Melting temperature\*Screw speed  
 85.695  
     Viscosity\*Screw speed  
 113.096  
 3-Way Interactions  
 589.527  
     Flow rate\*Injection Speed\*Injection pressure  
 82.222  
     Flow rate\*Injection Speed\*Melting temperature  
 159.742  
     Flow rate\*Injection pressure\*Melting temperature  
 89.710  
     Flow rate\*Injection Speed\*Viscosity  
 178.919  
     Flow rate\*Injection pressure\*Viscosity  
 97.217  
     Flow rate\*Melting temperature\*Viscosity  
 199.060



Flow rate\*Injection Speed\*Screw speed  
 78.443  
 Flow rate\*Injection pressure\*Screw speed  
 8.129  
 Flow rate\*Melting temperature\*Screw speed  
 86.350  
 Flow rate\*Viscosity\*Screw speed  
 114.024  
 Injection Speed\*Injection pressure\*Melting temperature  
 87.867  
 Injection Speed\*Injection pressure\*Viscosity  
 94.944  
 Injection Speed\*Melting temperature\*Viscosity  
 188.460  
 Injection Speed\*Injection pressure\*Screw speed  
 2.710  
 Injection Speed\*Melting temperature\*Screw speed  
 94.889  
 Injection Speed\*Viscosity\*Screw speed  
 121.221  
 Injection pressure\*Melting temperature\*Viscosity  
 101.673  
 Injection pressure\*Melting temperature\*Screw speed  
 4.956  
 Injection pressure\*Viscosity\*Screw speed  
 4.883  
 Melting temperature\*Viscosity\*Screw speed  
 136.500  
 4-Way Interactions  
 478.964  
 Flow rate\*Injection Speed\*Injection pressure\*Melting temperature  
 88.047  
 Flow rate\*Injection Speed\*Injection pressure\*Viscosity  
 95.116  
 Flow rate\*Injection Speed\*Melting temperature\*Viscosity  
 188.915  
 Flow rate\*Injection pressure\*Melting temperature\*Viscosity  
 101.739  
 Flow rate\*Injection Speed\*Injection pressure\*Screw speed  
 2.679  
 Flow rate\*Injection Speed\*Melting temperature\*Screw speed  
 95.690  
 Flow rate\*Injection pressure\*Melting temperature\*Screw speed  
 4.919  
 Flow rate\*Injection Speed\*Viscosity\*Screw speed  
 122.327  
 Flow rate\*Injection pressure\*Viscosity\*Screw speed  
 4.857  
 Flow rate\*Melting temperature\*Viscosity\*Screw speed  
 137.478  
 Injection Speed\*Injection pressure\*Melting temperature\*Viscosity  
 99.755  
 Injection Speed\*Injection pressure\*Melting temperature\*Screw speed  
 0.972  
 Injection Speed\*Injection pressure\*Viscosity\*Screw speed  
 0.793  
 Injection Speed\*Melting temperature\*Viscosity\*Screw speed  
 144.444  
 Injection pressure\*Melting temperature\*Viscosity\*Screw speed  
 2.254  
 5-Way Interactions  
 294.998

Flow rate\*Injection Speed\*Injection pressure\*Melting temperature\*Viscosity  
 99.913  
 Flow rate\*Injection Speed\*Injection pressure\*Melting temperature\*Screw speed  
 0.951  
 Flow rate\*Injection Speed\*Injection pressure\*Viscosity\*Screw speed  
 0.780  
 Flow rate\*Injection Speed\*Melting temperature\*Viscosity\*Screw speed  
 145.605  
 Flow rate\*Injection pressure\*Melting temperature\*Viscosity\*Screw speed  
 2.234  
 Injection Speed\*Injection pressure\*Melting temperature\*Viscosity\*Screw speed  
 0.032  
 6-Way Interactions  
 0.029  
 Flow rate\*Injection Speed\*Injection pressure\*Melting  
 temperature\*Viscosity\*Screw speed 0.029  
 Residual Error  
 259.096  
 Total

Source  
 Adj MS  
 Main Effects  
 60.514  
 Flow rate  
 157.373  
 Injection Speed  
 149.105  
 Injection pressure  
 83.905  
 Melting temperature  
 167.719  
 Viscosity  
 188.809  
 Screw speed  
 69.111  
 2-Way Interactions  
 32.480  
 Flow rate\*Injection Speed  
 149.425  
 Flow rate\*Injection pressure  
 83.997  
 Flow rate\*Melting temperature  
 167.922  
 Flow rate\*Viscosity  
 189.137  
 Flow rate\*Screw speed  
 69.705  
 Injection Speed\*Injection pressure  
 82.036  
 Injection Speed\*Melting temperature  
 159.416  
 Injection Speed\*Viscosity  
 178.471  
 Injection Speed\*Screw speed  
 77.711  
 Injection pressure\*Melting temperature  
 89.626  
 Injection pressure\*Viscosity  
 97.137  
 Injection pressure\*Screw speed  
 8.165

Melting temperature\*Viscosity  
198.728  
Melting temperature\*Screw speed  
85.695  
Viscosity\*Screw speed  
113.096  
3-Way Interactions  
29.476  
Flow rate\*Injection Speed\*Injection pressure  
82.222  
Flow rate\*Injection Speed\*Melting temperature  
159.742  
Flow rate\*Injection pressure\*Melting temperature  
89.710  
Flow rate\*Injection Speed\*Viscosity  
178.919  
Flow rate\*Injection pressure\*Viscosity  
97.217  
Flow rate\*Melting temperature\*Viscosity  
199.060  
Flow rate\*Injection Speed\*Screw speed  
78.443  
Flow rate\*Injection pressure\*Screw speed  
8.129  
Flow rate\*Melting temperature\*Screw speed  
86.350  
Flow rate\*Viscosity\*Screw speed  
114.024  
Injection Speed\*Injection pressure\*Melting temperature  
87.867  
Injection Speed\*Injection pressure\*Viscosity  
94.944  
Injection Speed\*Melting temperature\*Viscosity  
188.460  
Injection Speed\*Injection pressure\*Screw speed  
2.710  
Injection Speed\*Melting temperature\*Screw speed  
94.889  
Injection Speed\*Viscosity\*Screw speed  
121.221  
Injection pressure\*Melting temperature\*Viscosity  
101.673  
Injection pressure\*Melting temperature\*Screw speed  
4.956  
Injection pressure\*Viscosity\*Screw speed  
4.883  
Melting temperature\*Viscosity\*Screw speed  
136.500  
4-Way Interactions  
31.931  
Flow rate\*Injection Speed\*Injection pressure\*Melting temperature  
88.047  
Flow rate\*Injection Speed\*Injection pressure\*Viscosity  
95.116  
Flow rate\*Injection Speed\*Melting temperature\*Viscosity  
188.915  
Flow rate\*Injection pressure\*Melting temperature\*Viscosity  
101.739  
Flow rate\*Injection Speed\*Injection pressure\*Screw speed  
2.679  
Flow rate\*Injection Speed\*Melting temperature\*Screw speed  
95.690

|                                                                                        |       |
|----------------------------------------------------------------------------------------|-------|
| Flow rate*Injection pressure*Melting temperature*Screw speed                           |       |
| 4.919                                                                                  |       |
| Flow rate*Injection Speed*Viscosity*Screw speed                                        |       |
| 122.327                                                                                |       |
| Flow rate*Injection pressure*Viscosity*Screw speed                                     |       |
| 4.857                                                                                  |       |
| Flow rate*Melting temperature*Viscosity*Screw speed                                    |       |
| 137.478                                                                                |       |
| Injection Speed*Injection pressure*Melting temperature*Viscosity                       |       |
| 99.755                                                                                 |       |
| Injection Speed*Injection pressure*Melting temperature*Screw speed                     |       |
| 0.972                                                                                  |       |
| Injection Speed*Injection pressure*Viscosity*Screw speed                               |       |
| 0.793                                                                                  |       |
| Injection Speed*Melting temperature*Viscosity*Screw speed                              |       |
| 144.444                                                                                |       |
| Injection pressure*Melting temperature*Viscosity*Screw speed                           |       |
| 2.254                                                                                  |       |
| 5-Way Interactions                                                                     |       |
| 49.166                                                                                 |       |
| Flow rate*Injection Speed*Injection pressure*Melting temperature*Viscosity             |       |
| 99.913                                                                                 |       |
| Flow rate*Injection Speed*Injection pressure*Melting temperature*Screw speed           |       |
| 0.951                                                                                  |       |
| Flow rate*Injection Speed*Injection pressure*Viscosity*Screw speed                     |       |
| 0.780                                                                                  |       |
| Flow rate*Injection Speed*Melting temperature*Viscosity*Screw speed                    |       |
| 145.605                                                                                |       |
| Flow rate*Injection pressure*Melting temperature*Viscosity*Screw speed                 |       |
| 2.234                                                                                  |       |
| Injection Speed*Injection pressure*Melting temperature*Viscosity*Screw speed           |       |
| 0.032                                                                                  |       |
| 6-Way Interactions                                                                     |       |
| 0.029                                                                                  |       |
| Flow rate*Injection Speed*Injection pressure*Melting temperature*Viscosity*Screw speed | 0.029 |
| Residual Error                                                                         |       |
| 28.788                                                                                 |       |
| Total                                                                                  |       |
| Source                                                                                 |       |
| F                                                                                      |       |
| Main Effects                                                                           |       |
| 2.10                                                                                   |       |
| Flow rate                                                                              |       |
| 5.47                                                                                   |       |
| Injection Speed                                                                        |       |
| 5.18                                                                                   |       |
| Injection pressure                                                                     |       |
| 2.91                                                                                   |       |
| Melting temperature                                                                    |       |
| 5.83                                                                                   |       |
| Viscosity                                                                              |       |
| 6.56                                                                                   |       |
| Screw speed                                                                            |       |
| 2.40                                                                                   |       |
| 2-Way Interactions                                                                     |       |
| 1.13                                                                                   |       |
| Flow rate*Injection Speed                                                              |       |
| 5.19                                                                                   |       |
| Flow rate*Injection pressure                                                           |       |
| 2.92                                                                                   |       |

Flow rate\*Melting temperature  
 5.83  
 Flow rate\*Viscosity  
 6.57  
 Flow rate\*Screw speed  
 2.42  
 Injection Speed\*Injection pressure  
 2.85  
 Injection Speed\*Melting temperature  
 5.54  
 Injection Speed\*Viscosity  
 6.20  
 Injection Speed\*Screw speed  
 2.70  
 Injection pressure\*Melting temperature  
 3.11  
 Injection pressure\*Viscosity  
 3.37  
 Injection pressure\*Screw speed  
 0.28  
 Melting temperature\*Viscosity  
 6.90  
 Melting temperature\*Screw speed  
 2.98  
 Viscosity\*Screw speed  
 3.93  
 3-Way Interactions  
 1.02  
 Flow rate\*Injection Speed\*Injection pressure  
 2.86  
 Flow rate\*Injection Speed\*Melting temperature  
 5.55  
 Flow rate\*Injection pressure\*Melting temperature  
 3.12  
 Flow rate\*Injection Speed\*Viscosity  
 6.21  
 Flow rate\*Injection pressure\*Viscosity  
 3.38  
 Flow rate\*Melting temperature\*Viscosity  
 6.91  
 Flow rate\*Injection Speed\*Screw speed  
 2.72  
 Flow rate\*Injection pressure\*Screw speed  
 0.28  
 Flow rate\*Melting temperature\*Screw speed  
 3.00  
 Flow rate\*Viscosity\*Screw speed  
 3.96  
 Injection Speed\*Injection pressure\*Melting temperature  
 3.05  
 Injection Speed\*Injection pressure\*Viscosity  
 3.30  
 Injection Speed\*Melting temperature\*Viscosity  
 6.55  
 Injection Speed\*Injection pressure\*Screw speed  
 0.09  
 Injection Speed\*Melting temperature\*Screw speed  
 3.30  
 Injection Speed\*Viscosity\*Screw speed  
 4.21  
 Injection pressure\*Melting temperature\*Viscosity  
 3.53

|                    |                                                                                        |      |
|--------------------|----------------------------------------------------------------------------------------|------|
|                    | Injection pressure*Melting temperature*Screw speed                                     |      |
| 0.17               |                                                                                        |      |
|                    | Injection pressure*Viscosity*Screw speed                                               |      |
| 0.17               |                                                                                        |      |
|                    | Melting temperature*Viscosity*Screw speed                                              |      |
| 4.74               |                                                                                        |      |
| 4-Way Interactions |                                                                                        |      |
| 1.11               |                                                                                        |      |
|                    | Flow rate*Injection Speed*Injection pressure*Melting temperature                       |      |
| 3.06               |                                                                                        |      |
|                    | Flow rate*Injection Speed*Injection pressure*Viscosity                                 |      |
| 3.30               |                                                                                        |      |
|                    | Flow rate*Injection Speed*Melting temperature*Viscosity                                |      |
| 6.56               |                                                                                        |      |
|                    | Flow rate*Injection pressure*Melting temperature*Viscosity                             |      |
| 3.53               |                                                                                        |      |
|                    | Flow rate*Injection Speed*Injection pressure*Screw speed                               |      |
| 0.09               |                                                                                        |      |
|                    | Flow rate*Injection Speed*Melting temperature*Screw speed                              |      |
| 3.32               |                                                                                        |      |
|                    | Flow rate*Injection pressure*Melting temperature*Screw speed                           |      |
| 0.17               |                                                                                        |      |
|                    | Flow rate*Injection Speed*Viscosity*Screw speed                                        |      |
| 4.25               |                                                                                        |      |
|                    | Flow rate*Injection pressure*Viscosity*Screw speed                                     |      |
| 0.17               |                                                                                        |      |
|                    | Flow rate*Melting temperature*Viscosity*Screw speed                                    |      |
| 4.78               |                                                                                        |      |
|                    | Injection Speed*Injection pressure*Melting temperature*Viscosity                       |      |
| 3.47               |                                                                                        |      |
|                    | Injection Speed*Injection pressure*Melting temperature*Screw speed                     |      |
| 0.03               |                                                                                        |      |
|                    | Injection Speed*Injection pressure*Viscosity*Screw speed                               |      |
| 0.03               |                                                                                        |      |
|                    | Injection Speed*Melting temperature*Viscosity*Screw speed                              |      |
| 5.02               |                                                                                        |      |
|                    | Injection pressure*Melting temperature*Viscosity*Screw speed                           |      |
| 0.08               |                                                                                        |      |
| 5-Way Interactions |                                                                                        |      |
| 1.71               |                                                                                        |      |
|                    | Flow rate*Injection Speed*Injection pressure*Melting temperature*Viscosity             |      |
| 3.47               |                                                                                        |      |
|                    | Flow rate*Injection Speed*Injection pressure*Melting temperature*Screw speed           |      |
| 0.03               |                                                                                        |      |
|                    | Flow rate*Injection Speed*Injection pressure*Viscosity*Screw speed                     |      |
| 0.03               |                                                                                        |      |
|                    | Flow rate*Injection Speed*Melting temperature*Viscosity*Screw speed                    |      |
| 5.06               |                                                                                        |      |
|                    | Flow rate*Injection pressure*Melting temperature*Viscosity*Screw speed                 |      |
| 0.08               |                                                                                        |      |
|                    | Injection Speed*Injection pressure*Melting temperature*Viscosity*Screw speed           |      |
| 0.00               |                                                                                        |      |
| 6-Way Interactions |                                                                                        |      |
| 0.00               |                                                                                        |      |
|                    | Flow rate*Injection Speed*Injection pressure*Melting temperature*Viscosity*Screw speed | 0.00 |
| Residual Error     |                                                                                        |      |
| Total              |                                                                                        |      |
| Source             |                                                                                        |      |
| P                  |                                                                                        |      |
| Main Effects       |                                                                                        |      |
| 0.152              |                                                                                        |      |

Flow rate  
0.044  
Injection Speed  
0.049  
Injection pressure  
0.122  
Melting temperature  
0.039  
Viscosity  
0.031  
Screw speed  
0.156  
2-Way Interactions  
0.442  
Flow rate\*Injection Speed  
0.049  
Flow rate\*Injection pressure  
0.122  
Flow rate\*Melting temperature  
0.039  
Flow rate\*Viscosity  
0.031  
Flow rate\*Screw speed  
0.154  
Injection Speed\*Injection pressure  
0.126  
Injection Speed\*Melting temperature  
0.043  
Injection Speed\*Viscosity  
0.034  
Injection Speed\*Screw speed  
0.135  
Injection pressure\*Melting temperature  
0.111  
Injection pressure\*Viscosity  
0.099  
Injection pressure\*Screw speed  
0.607  
Melting temperature\*Viscosity  
0.027  
Melting temperature\*Screw speed  
0.119  
Viscosity\*Screw speed  
0.079  
3-Way Interactions  
0.513  
Flow rate\*Injection Speed\*Injection pressure  
0.125  
Flow rate\*Injection Speed\*Melting temperature  
0.043  
Flow rate\*Injection pressure\*Melting temperature  
0.111  
Flow rate\*Injection Speed\*Viscosity  
0.034  
Flow rate\*Injection pressure\*Viscosity  
0.099  
Flow rate\*Melting temperature\*Viscosity  
0.027  
Flow rate\*Injection Speed\*Screw speed  
0.133  
Flow rate\*Injection pressure\*Screw speed  
0.608

Flow rate\*Melting temperature\*Screw speed  
 0.117  
 Flow rate\*Viscosity\*Screw speed  
 0.078  
 Injection Speed\*Injection pressure\*Melting temperature  
 0.115  
 Injection Speed\*Injection pressure\*Viscosity  
 0.103  
 Injection Speed\*Melting temperature\*Viscosity  
 0.031  
 Injection Speed\*Injection pressure\*Screw speed  
 0.766  
 Injection Speed\*Melting temperature\*Screw speed  
 0.103  
 Injection Speed\*Viscosity\*Screw speed  
 0.070  
 Injection pressure\*Melting temperature\*Viscosity  
 0.093  
 Injection pressure\*Melting temperature\*Screw speed  
 0.688  
 Injection pressure\*Viscosity\*Screw speed  
 0.690  
 Melting temperature\*Viscosity\*Screw speed  
 0.057  
 4-Way Interactions  
 0.453  
 Flow rate\*Injection Speed\*Injection pressure\*Melting temperature  
 0.114  
 Flow rate\*Injection Speed\*Injection pressure\*Viscosity  
 0.102  
 Flow rate\*Injection Speed\*Melting temperature\*Viscosity  
 0.031  
 Flow rate\*Injection pressure\*Melting temperature\*Viscosity  
 0.093  
 Flow rate\*Injection Speed\*Injection pressure\*Screw speed  
 0.767  
 Flow rate\*Injection Speed\*Melting temperature\*Screw speed  
 0.102  
 Flow rate\*Injection pressure\*Melting temperature\*Screw speed  
 0.689  
 Flow rate\*Injection Speed\*Viscosity\*Screw speed  
 0.069  
 Flow rate\*Injection pressure\*Viscosity\*Screw speed  
 0.691  
 Flow rate\*Melting temperature\*Viscosity\*Screw speed  
 0.057  
 Injection Speed\*Injection pressure\*Melting temperature\*Viscosity  
 0.096  
 Injection Speed\*Injection pressure\*Melting temperature\*Screw speed  
 0.858  
 Injection Speed\*Injection pressure\*Viscosity\*Screw speed  
 0.872  
 Injection Speed\*Melting temperature\*Viscosity\*Screw speed  
 0.052  
 Injection pressure\*Melting temperature\*Viscosity\*Screw speed  
 0.786  
 5-Way Interactions  
 0.226  
 Flow rate\*Injection Speed\*Injection pressure\*Melting temperature\*Viscosity  
 0.095  
 Flow rate\*Injection Speed\*Injection pressure\*Melting temperature\*Screw speed  
 0.860



Flow rate\*Injection Speed\*Injection pressure\*Viscosity\*Screw speed  
0.873  
Flow rate\*Injection Speed\*Melting temperature\*Viscosity\*Screw speed  
0.051  
Flow rate\*Injection pressure\*Melting temperature\*Viscosity\*Screw speed  
0.787  
Injection Speed\*Injection pressure\*Melting temperature\*Viscosity\*Screw speed  
0.974  
6-Way Interactions  
0.975  
Flow rate\*Injection Speed\*Injection pressure\*Melting  
temperature\*Viscosity\*Screw speed 0.975  
Residual Error  
Total

#### Unusual Observations for Hard fitting

| Obs | StdOrder | Hard<br>fitting | Fit     | SE Fit | Residual | St Resid |
|-----|----------|-----------------|---------|--------|----------|----------|
| 1   | 1        | 16.0000         | 16.0845 | 5.3653 | -0.0845  | -2.18RX  |
| 2   | 2        | 15.0000         | 14.8886 | 5.3391 | 0.1114   | 0.21 X   |
| 4   | 4        | 19.0000         | 18.7430 | 5.3588 | 0.2570   | 0.96 X   |
| 5   | 5        | 22.0000         | 22.3113 | 5.3623 | -0.3113  | -1.69 X  |
| 7   | 7        | 8.0000          | 7.7749  | 5.3541 | 0.2251   | 0.64 X   |
| 8   | 8        | 13.0000         | 14.7095 | 5.3063 | -1.7095  | -2.15R   |
| 17  | 17       | 12.0000         | 13.5435 | 5.3103 | -1.5435  | -2.01R   |
| 19  | 19       | 8.0000          | 7.6176  | 5.3557 | 0.3824   | 1.18 X   |
| 38  | 38       | 14.0000         | 13.9225 | 5.3577 | 0.0775   | 0.27 X   |
| 43  | 43       | 11.0000         | 12.8690 | 5.2900 | -1.8690  | -2.08R   |
| 44  | 44       | 17.0000         | 14.1696 | 5.1766 | 2.8304   | 2.01R    |
| 45  | 45       | 7.0000          | 12.1805 | 4.7792 | -5.1805  | -2.12R   |
| 56  | 56       | 23.0000         | 22.7839 | 5.3556 | 0.2161   | 0.66 X   |
| 57  | 57       | 18.0000         | 18.2628 | 5.3539 | -0.2628  | -0.75 X  |
| 58  | 58       | 12.0000         | 11.9945 | 5.3620 | 0.0055   | 0.03 X   |
| 59  | 59       | 10.0000         | 10.8072 | 5.3403 | -0.8072  | -1.55 X  |
| 60  | 60       | 5.0000          | 5.0424  | 5.3650 | -0.0424  | -0.62 X  |
| 61  | 61       | 12.0000         | 12.0074 | 5.3640 | -0.0074  | -0.06 X  |
| 62  | 62       | 13.0000         | 13.4985 | 5.3464 | -0.4985  | -1.10 X  |
| 63  | 63       | 12.0000         | 11.7664 | 5.3635 | 0.2336   | 1.59 X   |
| 64  | 64       | 30.0000         | 22.8827 | 4.4204 | 7.1173   | 2.34R    |
| 65  | 65       | 8.0000          | 12.3766 | 4.9740 | -4.3766  | -2.18R   |
| 68  | 68       | 22.0000         | 21.5236 | 5.3570 | 0.4764   | 1.58 X   |
| 69  | 69       | 23.0000         | 23.1495 | 5.3602 | -0.1495  | -0.63 X  |
| 70  | 70       | 13.0000         | 12.9725 | 5.3633 | 0.0275   | 0.18 X   |
| 71  | 71       | 19.0000         | 18.8872 | 5.3617 | 0.1128   | 0.56 X   |
| 72  | 72       | 13.0000         | 13.0875 | 5.3514 | -0.0875  | -0.23 X  |
| 73  | 73       | 18.0000         | 18.0204 | 5.3653 | -0.0204  | -0.44 X  |

R denotes an observation with a large standardized residual.  
X denotes an observation whose X value gives it large leverage.

#### Estimated Coefficients for Hard fitting using data in uncoded units

| Term                | Coef     |
|---------------------|----------|
| Constant            | -2048417 |
| Flow rate           | 590591   |
| Injection Speed     | 102326   |
| Injection pressure  | -30422.3 |
| Melting temperature | 9654.62  |
| Viscosity           | 1047958  |
| Screw speed         | 289067   |

|                                      |          |
|--------------------------------------|----------|
| Flow rate*Injection Speed            | -31035.3 |
| Flow rate*Injection pressure         | 13577.8  |
| Flow rate*Melting temperature        | -2892.25 |
| Flow rate*Viscosity                  | -189540  |
| Flow rate*Screw speed                | -121079  |
| Injection Speed*Injection pressure   | 1122.31  |
| Injection Speed*Melting temperature  | -476.377 |
| Injection Speed*Viscosity            | -54724.5 |
| Injection Speed*Screw speed          | -13691.9 |
| Injection pressure*                  | 119.150  |
| Melting temperature                  |          |
| Injection pressure*Viscosity         | 23310.1  |
| Injection pressure*Screw speed       | -46.40   |
| Melting temperature*Viscosity        | -5153.25 |
| Melting temperature*Screw speed      | -1288.94 |
| Viscosity*Screw speed                | -161646  |
| Flow rate*Injection Speed*           | -506.951 |
| Injection pressure                   |          |
| Flow rate*Injection Speed*           | 148.611  |
| Melting temperature                  |          |
| Flow rate*Injection pressure*        | -53.7409 |
| Melting temperature                  |          |
| Flow rate*Injection Speed*Viscosity  | 11487.2  |
| Flow rate*Injection pressure*        | -11771.2 |
| Viscosity                            |          |
| Flow rate*Melting temperature*       | 1097.75  |
| Viscosity                            |          |
| Flow rate*Injection Speed*           | 5714.43  |
| Screw speed                          |          |
| Flow rate*Injection pressure*        | 109.043  |
| Screw speed                          |          |
| Flow rate*Melting temperature*       | 540.006  |
| Screw speed                          |          |
| Flow rate*Viscosity*Screw speed      | 61566.2  |
| Injection Speed*Injection pressure*  | -4.31904 |
| Melting temperature                  |          |
| Injection Speed*Injection pressure*  | -873.173 |
| Viscosity                            |          |
| Injection Speed*Melting temperature* | 262.995  |
| Viscosity                            |          |
| Injection Speed*Injection pressure*  | 16.034   |
| Screw speed                          |          |
| Injection Speed*Melting temperature* | 60.8614  |
| Screw speed                          |          |
| Injection Speed*Viscosity*           | 7821.21  |
| Screw speed                          |          |
| Injection pressure*                  | -91.3063 |
| Melting temperature*Viscosity        |          |
| Injection pressure*                  | 0.8269   |
| Melting temperature*Screw speed      |          |
| Injection pressure*Viscosity*        | -256.02  |
| Screw speed                          |          |
| Melting temperature*Viscosity*       | 730.672  |
| Screw speed                          |          |
| Flow rate*Injection Speed*           | 1.97837  |
| Injection pressure*                  |          |
| Melting temperature                  |          |
| Flow rate*Injection Speed*           | 459.567  |
| Injection pressure*Viscosity         |          |
| Flow rate*Injection Speed*           | -61.5089 |
| Melting temperature*Viscosity        |          |
| Flow rate*Injection pressure*        | 46.8316  |
| Melting temperature*Viscosity        |          |

|                                      |           |
|--------------------------------------|-----------|
| Flow rate*Injection Speed*           | -10.6129  |
| Injection pressure*Screw speed       |           |
| Flow rate*Injection Speed*           | -25.4087  |
| Melting temperature*Screw speed      |           |
| Flow rate*Injection pressure*        | -0.72464  |
| Melting temperature*Screw speed      |           |
| Flow rate*Injection Speed*Viscosity* | -2958.76  |
| Screw speed                          |           |
| Flow rate*Injection pressure*        | 149.368   |
| Viscosity*Screw speed                |           |
| Flow rate*Melting temperature*       | -280.245  |
| Viscosity*Screw speed                |           |
| Injection Speed*Injection pressure*  | 3.36993   |
| Melting temperature*Viscosity        |           |
| Injection Speed*Injection pressure*  | -0.096594 |
| Melting temperature*Screw speed      |           |
| Injection Speed*Injection pressure*  | 0.8146    |
| Viscosity*Screw speed                |           |
| Injection Speed*Melting temperature* | -35.1546  |
| Viscosity*Screw speed                |           |
| Injection pressure*                  | 0.61390   |
| Melting temperature*Viscosity*       |           |
| Screw speed                          |           |
| Flow rate*Injection Speed*           | -1.81302  |
| Injection pressure*                  |           |
| Melting temperature*Viscosity        |           |
| Flow rate*Injection Speed*           | 0.056873  |
| Injection pressure*                  |           |
| Melting temperature*Screw speed      |           |
| Flow rate*Injection Speed*           | -2.6844   |
| Injection pressure*Viscosity*        |           |
| Screw speed                          |           |
| Flow rate*Injection Speed*           | 13.3880   |
| Melting temperature*Viscosity*       |           |
| Screw speed                          |           |
| Flow rate*Injection pressure*        | -0.43444  |
| Melting temperature*Viscosity*       |           |
| Screw speed                          |           |
| Injection Speed*Injection pressure*  | 0.017615  |
| Melting temperature*Viscosity*       |           |
| Screw speed                          |           |
| Flow rate*Injection Speed*           | 0.0025316 |
| Injection pressure*                  |           |
| Melting temperature*Viscosity*       |           |
| Screw speed                          |           |

### Effects Pareto for Hard fitting

\* NOTE \* Some factors have more than 2 levels, no alias table was printed.

### Factorial Fit: Black dots versus Flow rate, Injection Speed, ...

\* NOTE \* This design has some botched runs. It will be analyzed using a regression approach.

Estimated Effects and Coefficients for Black dots (coded units)

| Term                                                       | Effect     | Coef      | SE Coef   | T     |
|------------------------------------------------------------|------------|-----------|-----------|-------|
| Constant                                                   |            | 581454020 | 438953401 | 1.32  |
| Flow rate                                                  | 705699139  | 352849570 | 266167967 | 1.33  |
| Injection Speed                                            | -14150962  | -7075481  | 5564881   | -1.27 |
| Injection pressure                                         | -56799611  | -28399805 | 26461702  | -1.07 |
| Melting temperature                                        | -42273422  | -21136711 | 15703845  | -1.35 |
| Viscosity                                                  | 529828450  | 264914225 | 200118091 | 1.32  |
| Screw speed                                                | 1822606892 | 911303446 | 699886215 | 1.30  |
| Flow rate*Injection Speed                                  | -8589564   | -4294782  | 3373626   | -1.27 |
| Flow rate*Injection pressure                               | -34473415  | -17236707 | 16046531  | -1.07 |
| Flow rate*Melting temperature                              | -25654047  | -12827024 | 9522797   | -1.35 |
| Flow rate*Viscosity                                        | 321556030  | 160778015 | 121306854 | 1.33  |
| Flow rate*Screw speed                                      | 1107544406 | 553772203 | 424042169 | 1.31  |
| Injection Speed*Injection pressure                         | 700512     | 350256    | 333509    | 1.05  |
| Injection Speed*Melting temperature                        | 514483     | 257242    | 198808    | 1.29  |
| Injection Speed*Viscosity                                  | -6437276   | -3218638  | 2534847   | -1.27 |
| Injection Speed*Screw speed                                | -23015588  | -11507794 | 8569398   | -1.34 |
| Injection pressure*<br>Melting temperature                 | 2052834    | 1026417   | 949687    | 1.08  |
| Injection pressure*Viscosity                               | -23980353  | -11990176 | 12358612  | -0.97 |
| Injection pressure*Screw speed                             | -66823561  | -33411780 | 41889602  | -0.80 |
| Melting temperature*Viscosity                              | -19265744  | -9632872  | 7204439   | -1.34 |
| Melting temperature*Screw speed                            | -67722781  | -33861391 | 24827993  | -1.36 |
| Viscosity*Screw speed                                      | 829176076  | 414588038 | 284852940 | 1.46  |
| Flow rate*Injection Speed*<br>Injection pressure           | 425300     | 212650    | 202172    | 1.05  |
| Flow rate*Injection Speed*<br>Melting temperature          | 312299     | 156150    | 120531    | 1.30  |
| Flow rate*Injection pressure*<br>Melting temperature       | 1245959    | 622979    | 575949    | 1.08  |
| Flow rate*Injection Speed*Viscosity                        | -3907804   | -1953902  | 1536250   | -1.27 |
| Flow rate*Injection pressure*<br>Viscosity                 | -14557161  | -7278581  | 7494381   | -0.97 |
| Flow rate*Melting temperature*<br>Viscosity                | -11692843  | -5846422  | 4367347   | -1.34 |
| Flow rate*Injection Speed*<br>Screw speed                  | -13990368  | -6995184  | 5190402   | -1.35 |
| Flow rate*Injection pressure*<br>Screw speed               | -40600623  | -20300311 | 25421173  | -0.80 |
| Flow rate*Melting temperature*<br>Screw speed              | -41155947  | -20577973 | 15047607  | -1.37 |
| Flow rate*Viscosity*Screw speed                            | 503966040  | 251983020 | 172541844 | 1.46  |
| Injection Speed*Injection pressure*<br>Melting temperature | -25341     | -12671    | 11952     | -1.06 |
| Injection Speed*Injection pressure*<br>Viscosity           | 296027     | 148014    | 155019    | 0.95  |
| Injection Speed*Melting temperature*<br>Viscosity          | 234108     | 117054    | 91080     | 1.29  |
| Injection Speed*Injection pressure*<br>Screw speed         | 950020     | 475010    | 509496    | 0.93  |
| Injection Speed*Melting temperature*<br>Screw speed        | 853620     | 426810    | 303804    | 1.40  |
| Injection Speed*Viscosity*<br>Screw speed                  | -10456270  | -5228135  | 3546322   | -1.47 |
| Injection pressure*<br>Melting temperature*Viscosity       | 865788     | 432894    | 447628    | 0.97  |
| Injection pressure*<br>Melting temperature*Screw speed     | 2509167    | 1254584   | 1463766   | 0.86  |
| Injection pressure*Viscosity*<br>Screw speed               | -27563629  | -13781814 | 18069041  | -0.76 |
| Melting temperature*Viscosity*<br>Screw speed              | -30816862  | -15408431 | 10144045  | -1.52 |
| Flow rate*Injection Speed*                                 | -15386     | -7693     | 7246      | -1.06 |

|                                      |           |          |          |       |
|--------------------------------------|-----------|----------|----------|-------|
| Injection pressure*                  |           |          |          |       |
| Melting temperature                  |           |          |          |       |
| Flow rate*Injection Speed*           | 179762    | 89881    | 93977    | 0.96  |
| Injection pressure*Viscosity         |           |          |          |       |
| Flow rate*Injection Speed*           | 142122    | 71061    | 55202    | 1.29  |
| Melting temperature*Viscosity        |           |          |          |       |
| Flow rate*Injection pressure*        | 525583    | 262792   | 271470   | 0.97  |
| Melting temperature*Viscosity        |           |          |          |       |
| Flow rate*Injection Speed*           | 577527    | 288764   | 309227   | 0.93  |
| Injection pressure*Screw speed       |           |          |          |       |
| Flow rate*Injection Speed*           | 518917    | 259459   | 184075   | 1.41  |
| Melting temperature*Screw speed      |           |          |          |       |
| Flow rate*Injection pressure*        | 1524694   | 762347   | 888703   | 0.86  |
| Melting temperature*Screw speed      |           |          |          |       |
| Flow rate*Injection Speed*Viscosity* | -6357205  | -3178603 | 2147317  | -1.48 |
| Screw speed                          |           |          |          |       |
| Flow rate*Injection pressure*        | -16754742 | -8377371 | 10978134 | -0.76 |
| Viscosity*Screw speed                |           |          |          |       |
| Flow rate*Melting temperature*       | -18731420 | -9365710 | 6147108  | -1.52 |
| Viscosity*Screw speed                |           |          |          |       |
| Injection Speed*Injection pressure*  | -10699    | -5350    | 5605     | -0.95 |
| Melting temperature*Viscosity        |           |          |          |       |
| Injection Speed*Injection pressure*  | -35492    | -17746   | 17879    | -0.99 |
| Melting temperature*Screw speed      |           |          |          |       |
| Injection Speed*Injection pressure*  | 400469    | 200234   | 224419   | 0.89  |
| Viscosity*Screw speed                |           |          |          |       |
| Injection Speed*Melting temperature* | 387870    | 193935   | 126247   | 1.54  |
| Viscosity*Screw speed                |           |          |          |       |
| Injection pressure*                  | 1037371   | 518685   | 637599   | 0.81  |
| Melting temperature*Viscosity*       |           |          |          |       |
| Screw speed                          |           |          |          |       |
| Flow rate*Injection Speed*           | -6497     | -3249    | 3398     | -0.96 |
| Injection pressure*                  |           |          |          |       |
| Melting temperature*Viscosity        |           |          |          |       |
| Flow rate*Injection Speed*           | -21578    | -10789   | 10857    | -0.99 |
| Injection pressure*                  |           |          |          |       |
| Melting temperature*Screw speed      |           |          |          |       |
| Flow rate*Injection Speed*           | 243550    | 121775   | 136384   | 0.89  |
| Injection pressure*Viscosity*        |           |          |          |       |
| Screw speed                          |           |          |          |       |
| Flow rate*Injection Speed*           | 235831    | 117916   | 76478    | 1.54  |
| Melting temperature*Viscosity*       |           |          |          |       |
| Screw speed                          |           |          |          |       |
| Flow rate*Injection pressure*        | 630641    | 315321   | 387598   | 0.81  |
| Melting temperature*Viscosity*       |           |          |          |       |
| Screw speed                          |           |          |          |       |
| Injection Speed*Injection pressure*  | -14980    | -7490    | 7970     | -0.94 |
| Melting temperature*Viscosity*       |           |          |          |       |
| Screw speed                          |           |          |          |       |
| Flow rate*Injection Speed*           | -9111     | -4556    | 4847     | -0.94 |
| Injection pressure*                  |           |          |          |       |
| Melting temperature*Viscosity*       |           |          |          |       |
| Screw speed                          |           |          |          |       |

|                           |       |
|---------------------------|-------|
| Term                      | P     |
| Constant                  | 0.218 |
| Flow rate                 | 0.218 |
| Injection Speed           | 0.235 |
| Injection pressure        | 0.311 |
| Melting temperature       | 0.211 |
| Viscosity                 | 0.218 |
| Screw speed               | 0.225 |
| Flow rate*Injection Speed | 0.235 |

|                                      |       |
|--------------------------------------|-------|
| Flow rate*Injection pressure         | 0.311 |
| Flow rate*Melting temperature        | 0.211 |
| Flow rate*Viscosity                  | 0.218 |
| Flow rate*Screw speed                | 0.224 |
| Injection Speed*Injection pressure   | 0.321 |
| Injection Speed*Melting temperature  | 0.228 |
| Injection Speed*Viscosity            | 0.236 |
| Injection Speed*Screw speed          | 0.212 |
| Injection pressure*                  | 0.308 |
| Melting temperature                  |       |
| Injection pressure*Viscosity         | 0.357 |
| Injection pressure*Screw speed       | 0.446 |
| Melting temperature*Viscosity        | 0.214 |
| Melting temperature*Screw speed      | 0.206 |
| Viscosity*Screw speed                | 0.180 |
| Flow rate*Injection Speed*           | 0.320 |
| Injection pressure                   |       |
| Flow rate*Injection Speed*           | 0.227 |
| Melting temperature                  |       |
| Flow rate*Injection pressure*        | 0.308 |
| Melting temperature                  |       |
| Flow rate*Injection Speed*Viscosity  | 0.235 |
| Flow rate*Injection pressure*        | 0.357 |
| Viscosity                            |       |
| Flow rate*Melting temperature*       | 0.214 |
| Viscosity                            |       |
| Flow rate*Injection Speed*           | 0.211 |
| Screw speed                          |       |
| Flow rate*Injection pressure*        | 0.445 |
| Screw speed                          |       |
| Flow rate*Melting temperature*       | 0.205 |
| Screw speed                          |       |
| Flow rate*Viscosity*Screw speed      | 0.178 |
| Injection Speed*Injection pressure*  | 0.317 |
| Melting temperature                  |       |
| Injection Speed*Injection pressure*  | 0.365 |
| Viscosity                            |       |
| Injection Speed*Melting temperature* | 0.231 |
| Viscosity                            |       |
| Injection Speed*Injection pressure*  | 0.376 |
| Screw speed                          |       |
| Injection Speed*Melting temperature* | 0.194 |
| Screw speed                          |       |
| Injection Speed*Viscosity*           | 0.175 |
| Screw speed                          |       |
| Injection pressure*                  | 0.359 |
| Melting temperature*Viscosity        |       |
| Injection pressure*                  | 0.414 |
| Melting temperature*Screw speed      |       |
| Injection pressure*Viscosity*        | 0.465 |
| Screw speed                          |       |
| Melting temperature*Viscosity*       | 0.163 |
| Screw speed                          |       |
| Flow rate*Injection Speed*           | 0.316 |
| Injection pressure*                  |       |
| Melting temperature                  |       |
| Flow rate*Injection Speed*           | 0.364 |
| Injection pressure*Viscosity         |       |
| Flow rate*Injection Speed*           | 0.230 |
| Melting temperature*Viscosity        |       |
| Flow rate*Injection pressure*        | 0.358 |
| Melting temperature*Viscosity        |       |
| Flow rate*Injection Speed*           | 0.375 |

|                                      |       |
|--------------------------------------|-------|
| Injection pressure*Screw speed       |       |
| Flow rate*Injection Speed*           | 0.192 |
| Melting temperature*Screw speed      |       |
| Flow rate*Injection pressure*        | 0.413 |
| Melting temperature*Screw speed      |       |
| Flow rate*Injection Speed*Viscosity* | 0.173 |
| Screw speed                          |       |
| Flow rate*Injection pressure*        | 0.465 |
| Viscosity*Screw speed                |       |
| Flow rate*Melting temperature*       | 0.162 |
| Viscosity*Screw speed                |       |
| Injection Speed*Injection pressure*  | 0.365 |
| Melting temperature*Viscosity        |       |
| Injection Speed*Injection pressure*  | 0.347 |
| Melting temperature*Screw speed      |       |
| Injection Speed*Injection pressure*  | 0.395 |
| Viscosity*Screw speed                |       |
| Injection Speed*Melting temperature* | 0.159 |
| Viscosity*Screw speed                |       |
| Injection pressure*                  | 0.437 |
| Melting temperature*Viscosity*       |       |
| Screw speed                          |       |
| Flow rate*Injection Speed*           | 0.364 |
| Injection pressure*                  |       |
| Melting temperature*Viscosity        |       |
| Flow rate*Injection Speed*           | 0.346 |
| Injection pressure*                  |       |
| Melting temperature*Screw speed      |       |
| Flow rate*Injection Speed*           | 0.395 |
| Injection pressure*Viscosity*        |       |
| Screw speed                          |       |
| Flow rate*Injection Speed*           | 0.158 |
| Melting temperature*Viscosity*       |       |
| Screw speed                          |       |
| Flow rate*Injection pressure*        | 0.437 |
| Melting temperature*Viscosity*       |       |
| Screw speed                          |       |
| Injection Speed*Injection pressure*  | 0.372 |
| Melting temperature*Viscosity*       |       |
| Screw speed                          |       |
| Flow rate*Injection Speed*           | 0.372 |
| Injection pressure*                  |       |
| Melting temperature*Viscosity*       |       |
| Screw speed                          |       |

S = 8.13954      PRESS = 8335907  
 R-Sq = 88.25%    R-Sq(pred) = 0.00%    R-Sq(adj) = 6.03%

#### Analysis of Variance for Black dots (coded units)

|                    |  |
|--------------------|--|
| Source             |  |
| DF                 |  |
| Main Effects       |  |
| 6                  |  |
| Flow rate          |  |
| 1                  |  |
| Injection Speed    |  |
| 1                  |  |
| Injection pressure |  |
| 1                  |  |

```

    Melting temperature
1
    Viscosity
1
    Screw speed
1
2-Way Interactions
15
    Flow rate*Injection Speed
1
    Flow rate*Injection pressure
1
    Flow rate*Melting temperature
1
    Flow rate*Viscosity
1
    Flow rate*Screw speed
1
    Injection Speed*Injection pressure
1
    Injection Speed*Melting temperature
1
    Injection Speed*Viscosity
1
    Injection Speed*Screw speed
1
    Injection pressure*Melting temperature
1
    Injection pressure*Viscosity
1
    Injection pressure*Screw speed
1
    Melting temperature*Viscosity
1
    Melting temperature*Screw speed
1
    Viscosity*Screw speed
1
3-Way Interactions
20
    Flow rate*Injection Speed*Injection pressure
1
    Flow rate*Injection Speed*Melting temperature
1
    Flow rate*Injection pressure*Melting temperature
1
    Flow rate*Injection Speed*Viscosity
1
    Flow rate*Injection pressure*Viscosity
1
    Flow rate*Melting temperature*Viscosity
1
    Flow rate*Injection Speed*Screw speed
1
    Flow rate*Injection pressure*Screw speed
1
    Flow rate*Melting temperature*Screw speed
1
    Flow rate*Viscosity*Screw speed
1
    Injection Speed*Injection pressure*Melting temperature
1

```



```

Injection Speed*Injection pressure*Viscosity
1
Injection Speed*Melting temperature*Viscosity
1
Injection Speed*Injection pressure*Screw speed
1
Injection Speed*Melting temperature*Screw speed
1
Injection Speed*Viscosity*Screw speed
1
Injection pressure*Melting temperature*Viscosity
1
Injection pressure*Melting temperature*Screw speed
1
Injection pressure*Viscosity*Screw speed
1
Melting temperature*Viscosity*Screw speed
1
4-Way Interactions
15
Flow rate*Injection Speed*Injection pressure*Melting temperature
1
Flow rate*Injection Speed*Injection pressure*Viscosity
1
Flow rate*Injection Speed*Melting temperature*Viscosity
1
Flow rate*Injection pressure*Melting temperature*Viscosity
1
Flow rate*Injection Speed*Injection pressure*Screw speed
1
Flow rate*Injection Speed*Melting temperature*Screw speed
1
Flow rate*Injection pressure*Melting temperature*Screw speed
1
Flow rate*Injection Speed*Viscosity*Screw speed
1
Flow rate*Injection pressure*Viscosity*Screw speed
1
Flow rate*Melting temperature*Viscosity*Screw speed
1
Injection Speed*Injection pressure*Melting temperature*Viscosity
1
Injection Speed*Injection pressure*Melting temperature*Screw speed
1
Injection Speed*Injection pressure*Viscosity*Screw speed
1
Injection Speed*Melting temperature*Viscosity*Screw speed
1
Injection pressure*Melting temperature*Viscosity*Screw speed
1
5-Way Interactions
6
Flow rate*Injection Speed*Injection pressure*Melting temperature*Viscosity
1
Flow rate*Injection Speed*Injection pressure*Melting temperature*Screw speed
1
Flow rate*Injection Speed*Injection pressure*Viscosity*Screw speed
1
Flow rate*Injection Speed*Melting temperature*Viscosity*Screw speed
1
Flow rate*Injection pressure*Melting temperature*Viscosity*Screw speed
1

```

```

Injection Speed*Injection pressure*Melting temperature*Viscosity*Screw speed
1
6-Way Interactions
1
Flow rate*Injection Speed*Injection pressure*Melting
temperature*Viscosity*Screw speed 1
Residual Error
9
Total
72

Source
Seq SS
Main Effects
1081.30
Flow rate
5.47
Injection Speed
313.45
Injection pressure
693.84
Melting temperature
31.50
Viscosity
0.00
Screw speed
37.03
2-Way Interactions
1058.98
Flow rate*Injection Speed
8.24
Flow rate*Injection pressure
300.43
Flow rate*Melting temperature
71.75
Flow rate*Viscosity
2.04
Flow rate*Screw speed
24.33
Injection Speed*Injection pressure
24.48
Injection Speed*Melting temperature
79.02
Injection Speed*Viscosity
14.12
Injection Speed*Screw speed
22.25
Injection pressure*Melting temperature
41.34
Injection pressure*Viscosity
50.32
Injection pressure*Screw speed
20.09
Melting temperature*Viscosity
26.56
Melting temperature*Screw speed
355.80
Viscosity*Screw speed
18.21
3-Way Interactions
1346.63
Flow rate*Injection Speed*Injection pressure
72.72

```

Flow rate\*Injection Speed\*Melting temperature  
 1.49  
 Flow rate\*Injection pressure\*Melting temperature  
 379.03  
 Flow rate\*Injection Speed\*Viscosity  
 0.06  
 Flow rate\*Injection pressure\*Viscosity  
 4.50  
 Flow rate\*Melting temperature\*Viscosity  
 30.25  
 Flow rate\*Injection Speed\*Screw speed  
 163.77  
 Flow rate\*Injection pressure\*Screw speed  
 143.39  
 Flow rate\*Melting temperature\*Screw speed  
 31.40  
 Flow rate\*Viscosity\*Screw speed  
 215.74  
 Injection Speed\*Injection pressure\*Melting temperature  
 33.08  
 Injection Speed\*Injection pressure\*Viscosity  
 169.13  
 Injection Speed\*Melting temperature\*Viscosity  
 7.97  
 Injection Speed\*Injection pressure\*Screw speed  
 2.48  
 Injection Speed\*Melting temperature\*Screw speed  
 31.41  
 Injection Speed\*Viscosity\*Screw speed  
 13.51  
 Injection pressure\*Melting temperature\*Viscosity  
 16.98  
 Injection pressure\*Melting temperature\*Screw speed  
 15.85  
 Injection pressure\*Viscosity\*Screw speed  
 13.20  
 Melting temperature\*Viscosity\*Screw speed  
 0.65  
 4-Way Interactions  
 664.92  
 Flow rate\*Injection Speed\*Injection pressure\*Melting temperature  
 4.54  
 Flow rate\*Injection Speed\*Injection pressure\*Viscosity  
 68.90  
 Flow rate\*Injection Speed\*Melting temperature\*Viscosity  
 2.20  
 Flow rate\*Injection pressure\*Melting temperature\*Viscosity  
 70.78  
 Flow rate\*Injection Speed\*Injection pressure\*Screw speed  
 3.39  
 Flow rate\*Injection Speed\*Melting temperature\*Screw speed  
 54.02  
 Flow rate\*Injection pressure\*Melting temperature\*Screw speed  
 17.60  
 Flow rate\*Injection Speed\*Viscosity\*Screw speed  
 141.58  
 Flow rate\*Injection pressure\*Viscosity\*Screw speed  
 54.77  
 Flow rate\*Melting temperature\*Viscosity\*Screw speed  
 3.78  
 Injection Speed\*Injection pressure\*Melting temperature\*Viscosity  
 24.19

|                                                                                        |         |
|----------------------------------------------------------------------------------------|---------|
| Injection Speed*Injection pressure*Melting temperature*Screw speed                     | 0.35    |
| Injection Speed*Injection pressure*Viscosity*Screw speed                               | 102.88  |
| Injection Speed*Melting temperature*Viscosity*Screw speed                              | 24.52   |
| Injection pressure*Melting temperature*Viscosity*Screw speed                           | 91.42   |
| 5-Way Interactions                                                                     | 269.57  |
| Flow rate*Injection Speed*Injection pressure*Melting temperature*Viscosity             | 29.68   |
| Flow rate*Injection Speed*Injection pressure*Melting temperature*Screw speed           | 65.38   |
| Flow rate*Injection Speed*Injection pressure*Viscosity*Screw speed                     | 9.72    |
| Flow rate*Injection Speed*Melting temperature*Viscosity*Screw speed                    | 116.81  |
| Flow rate*Injection pressure*Melting temperature*Viscosity*Screw speed                 | 47.97   |
| Injection Speed*Injection pressure*Melting temperature*Viscosity*Screw speed           | 0.01    |
| 6-Way Interactions                                                                     | 58.53   |
| Flow rate*Injection Speed*Injection pressure*Melting temperature*Viscosity*Screw speed | 58.53   |
| Residual Error                                                                         | 596.27  |
| Total                                                                                  | 5076.22 |

|                                     |        |
|-------------------------------------|--------|
| Source                              |        |
| Adj SS                              |        |
| Main Effects                        | 257.66 |
| Flow rate                           | 116.43 |
| Injection Speed                     | 107.10 |
| Injection pressure                  | 76.31  |
| Melting temperature                 | 120.02 |
| Viscosity                           | 116.10 |
| Screw speed                         | 112.32 |
| 2-Way Interactions                  | 593.32 |
| Flow rate*Injection Speed           | 107.37 |
| Flow rate*Injection pressure        | 76.44  |
| Flow rate*Melting temperature       | 120.21 |
| Flow rate*Viscosity                 | 116.38 |
| Flow rate*Screw speed               | 112.99 |
| Injection Speed*Injection pressure  | 73.07  |
| Injection Speed*Melting temperature | 110.92 |

Injection Speed\*Viscosity  
 106.82  
 Injection Speed\*Screw speed  
 119.48  
 Injection pressure\*Melting temperature  
 77.39  
 Injection pressure\*Viscosity  
 62.36  
 Injection pressure\*Screw speed  
 42.15  
 Melting temperature\*Viscosity  
 118.44  
 Melting temperature\*Screw speed  
 123.23  
 Viscosity\*Screw speed  
 140.34  
 3-Way Interactions  
 947.90  
 Flow rate\*Injection Speed\*Injection pressure  
 73.30  
 Flow rate\*Injection Speed\*Melting temperature  
 111.20  
 Flow rate\*Injection pressure\*Melting temperature  
 77.51  
 Flow rate\*Injection Speed\*Viscosity  
 107.17  
 Flow rate\*Injection pressure\*Viscosity  
 62.49  
 Flow rate\*Melting temperature\*Viscosity  
 118.73  
 Flow rate\*Injection Speed\*Screw speed  
 120.34  
 Flow rate\*Injection pressure\*Screw speed  
 42.25  
 Flow rate\*Melting temperature\*Screw speed  
 123.90  
 Flow rate\*Viscosity\*Screw speed  
 141.30  
 Injection Speed\*Injection pressure\*Melting temperature  
 74.45  
 Injection Speed\*Injection pressure\*Viscosity  
 60.40  
 Injection Speed\*Melting temperature\*Viscosity  
 109.43  
 Injection Speed\*Injection pressure\*Screw speed  
 57.59  
 Injection Speed\*Melting temperature\*Screw speed  
 130.76  
 Injection Speed\*Viscosity\*Screw speed  
 143.99  
 Injection pressure\*Melting temperature\*Viscosity  
 61.96  
 Injection pressure\*Melting temperature\*Screw speed  
 48.67  
 Injection pressure\*Viscosity\*Screw speed  
 38.54  
 Melting temperature\*Viscosity\*Screw speed  
 152.86  
 4-Way Interactions  
 785.12  
 Flow rate\*Injection Speed\*Injection pressure\*Melting temperature  
 74.67

|                                                                                        |        |
|----------------------------------------------------------------------------------------|--------|
| Flow rate*Injection Speed*Injection pressure*Viscosity                                 | 60.60  |
| Flow rate*Injection Speed*Melting temperature*Viscosity                                | 109.79 |
| Flow rate*Injection pressure*Melting temperature*Viscosity                             | 62.08  |
| Flow rate*Injection Speed*Injection pressure*Screw speed                               | 57.77  |
| Flow rate*Injection Speed*Melting temperature*Screw speed                              | 131.63 |
| Flow rate*Injection pressure*Melting temperature*Screw speed                           | 48.75  |
| Flow rate*Injection Speed*Viscosity*Screw speed                                        | 145.17 |
| Flow rate*Injection pressure*Viscosity*Screw speed                                     | 38.58  |
| Flow rate*Melting temperature*Viscosity*Screw speed                                    | 153.79 |
| Injection Speed*Injection pressure*Melting temperature*Viscosity                       | 60.35  |
| Injection Speed*Injection pressure*Melting temperature*Screw speed                     | 65.27  |
| Injection Speed*Injection pressure*Viscosity*Screw speed                               | 52.74  |
| Injection Speed*Melting temperature*Viscosity*Screw speed                              | 156.34 |
| Injection pressure*Melting temperature*Viscosity*Screw speed                           | 43.84  |
| 5-Way Interactions                                                                     | 318.28 |
| Flow rate*Injection Speed*Injection pressure*Melting temperature*Viscosity             | 60.54  |
| Flow rate*Injection Speed*Injection pressure*Melting temperature*Screw speed           | 65.43  |
| Flow rate*Injection Speed*Injection pressure*Viscosity*Screw speed                     | 52.82  |
| Flow rate*Injection Speed*Melting temperature*Viscosity*Screw speed                    | 157.50 |
| Flow rate*Injection pressure*Melting temperature*Viscosity*Screw speed                 | 43.85  |
| Injection Speed*Injection pressure*Melting temperature*Viscosity*Screw speed           | 58.51  |
| 6-Way Interactions                                                                     | 58.53  |
| Flow rate*Injection Speed*Injection pressure*Melting temperature*Viscosity*Screw speed | 58.53  |
| Residual Error                                                                         | 596.27 |
| Total                                                                                  |        |
| Source                                                                                 |        |
| Adj MS                                                                                 |        |
| Main Effects                                                                           | 42.94  |
| Flow rate                                                                              | 116.43 |
| Injection Speed                                                                        | 107.10 |
| Injection pressure                                                                     | 76.31  |
| Melting temperature                                                                    | 120.02 |

Viscosity  
 116.10  
 Screw speed  
 112.32  
 2-Way Interactions  
 39.55  
 Flow rate\*Injection Speed  
 107.37  
 Flow rate\*Injection pressure  
 76.44  
 Flow rate\*Melting temperature  
 120.21  
 Flow rate\*Viscosity  
 116.38  
 Flow rate\*Screw speed  
 112.99  
 Injection Speed\*Injection pressure  
 73.07  
 Injection Speed\*Melting temperature  
 110.92  
 Injection Speed\*Viscosity  
 106.82  
 Injection Speed\*Screw speed  
 119.48  
 Injection pressure\*Melting temperature  
 77.39  
 Injection pressure\*Viscosity  
 62.36  
 Injection pressure\*Screw speed  
 42.15  
 Melting temperature\*Viscosity  
 118.44  
 Melting temperature\*Screw speed  
 123.23  
 Viscosity\*Screw speed  
 140.34  
 3-Way Interactions  
 47.40  
 Flow rate\*Injection Speed\*Injection pressure  
 73.30  
 Flow rate\*Injection Speed\*Melting temperature  
 111.20  
 Flow rate\*Injection pressure\*Melting temperature  
 77.51  
 Flow rate\*Injection Speed\*Viscosity  
 107.17  
 Flow rate\*Injection pressure\*Viscosity  
 62.49  
 Flow rate\*Melting temperature\*Viscosity  
 118.73  
 Flow rate\*Injection Speed\*Screw speed  
 120.34  
 Flow rate\*Injection pressure\*Screw speed  
 42.25  
 Flow rate\*Melting temperature\*Screw speed  
 123.90  
 Flow rate\*Viscosity\*Screw speed  
 141.30  
 Injection Speed\*Injection pressure\*Melting temperature  
 74.45  
 Injection Speed\*Injection pressure\*Viscosity  
 60.40

Injection Speed\*Melting temperature\*Viscosity  
 109.43  
 Injection Speed\*Injection pressure\*Screw speed  
 57.59  
 Injection Speed\*Melting temperature\*Screw speed  
 130.76  
 Injection Speed\*Viscosity\*Screw speed  
 143.99  
 Injection pressure\*Melting temperature\*Viscosity  
 61.96  
 Injection pressure\*Melting temperature\*Screw speed  
 48.67  
 Injection pressure\*Viscosity\*Screw speed  
 38.54  
 Melting temperature\*Viscosity\*Screw speed  
 152.86  
 4-Way Interactions  
 52.34  
 Flow rate\*Injection Speed\*Injection pressure\*Melting temperature  
 74.67  
 Flow rate\*Injection Speed\*Injection pressure\*Viscosity  
 60.60  
 Flow rate\*Injection Speed\*Melting temperature\*Viscosity  
 109.79  
 Flow rate\*Injection pressure\*Melting temperature\*Viscosity  
 62.08  
 Flow rate\*Injection Speed\*Injection pressure\*Screw speed  
 57.77  
 Flow rate\*Injection Speed\*Melting temperature\*Screw speed  
 131.63  
 Flow rate\*Injection pressure\*Melting temperature\*Screw speed  
 48.75  
 Flow rate\*Injection Speed\*Viscosity\*Screw speed  
 145.17  
 Flow rate\*Injection pressure\*Viscosity\*Screw speed  
 38.58  
 Flow rate\*Melting temperature\*Viscosity\*Screw speed  
 153.79  
 Injection Speed\*Injection pressure\*Melting temperature\*Viscosity  
 60.35  
 Injection Speed\*Injection pressure\*Melting temperature\*Screw speed  
 65.27  
 Injection Speed\*Injection pressure\*Viscosity\*Screw speed  
 52.74  
 Injection Speed\*Melting temperature\*Viscosity\*Screw speed  
 156.34  
 Injection pressure\*Melting temperature\*Viscosity\*Screw speed  
 43.84  
 5-Way Interactions  
 53.05  
 Flow rate\*Injection Speed\*Injection pressure\*Melting temperature\*Viscosity  
 60.54  
 Flow rate\*Injection Speed\*Injection pressure\*Melting temperature\*Screw speed  
 65.43  
 Flow rate\*Injection Speed\*Injection pressure\*Viscosity\*Screw speed  
 52.82  
 Flow rate\*Injection Speed\*Melting temperature\*Viscosity\*Screw speed  
 157.50  
 Flow rate\*Injection pressure\*Melting temperature\*Viscosity\*Screw speed  
 43.85  
 Injection Speed\*Injection pressure\*Melting temperature\*Viscosity\*Screw speed  
 58.51



```

6-Way Interactions
58.53
  Flow rate*Injection Speed*Injection pressure*Melting
temperature*Viscosity*Screw speed  58.53
Residual Error
66.25
Total

Source
F
Main Effects
0.65
  Flow rate
1.76
  Injection Speed
1.62
  Injection pressure
1.15
  Melting temperature
1.81
  Viscosity
1.75
  Screw speed
1.70
2-Way Interactions
0.60
  Flow rate*Injection Speed
1.62
  Flow rate*Injection pressure
1.15
  Flow rate*Melting temperature
1.81
  Flow rate*Viscosity
1.76
  Flow rate*Screw speed
1.71
  Injection Speed*Injection pressure
1.10
  Injection Speed*Melting temperature
1.67
  Injection Speed*Viscosity
1.61
  Injection Speed*Screw speed
1.80
  Injection pressure*Melting temperature
1.17
  Injection pressure*Viscosity
0.94
  Injection pressure*Screw speed
0.64
  Melting temperature*Viscosity
1.79
  Melting temperature*Screw speed
1.86
  Viscosity*Screw speed
2.12
3-Way Interactions
0.72
  Flow rate*Injection Speed*Injection pressure
1.11
  Flow rate*Injection Speed*Melting temperature
1.68

```

Flow rate\*Injection pressure\*Melting temperature  
 1.17  
 Flow rate\*Injection Speed\*Viscosity  
 1.62  
 Flow rate\*Injection pressure\*Viscosity  
 0.94  
 Flow rate\*Melting temperature\*Viscosity  
 1.79  
 Flow rate\*Injection Speed\*Screw speed  
 1.82  
 Flow rate\*Injection pressure\*Screw speed  
 0.64  
 Flow rate\*Melting temperature\*Screw speed  
 1.87  
 Flow rate\*Viscosity\*Screw speed  
 2.13  
 Injection Speed\*Injection pressure\*Melting temperature  
 1.12  
 Injection Speed\*Injection pressure\*Viscosity  
 0.91  
 Injection Speed\*Melting temperature\*Viscosity  
 1.65  
 Injection Speed\*Injection pressure\*Screw speed  
 0.87  
 Injection Speed\*Melting temperature\*Screw speed  
 1.97  
 Injection Speed\*Viscosity\*Screw speed  
 2.17  
 Injection pressure\*Melting temperature\*Viscosity  
 0.94  
 Injection pressure\*Melting temperature\*Screw speed  
 0.73  
 Injection pressure\*Viscosity\*Screw speed  
 0.58  
 Melting temperature\*Viscosity\*Screw speed  
 2.31  
 4-Way Interactions  
 0.79  
 Flow rate\*Injection Speed\*Injection pressure\*Melting temperature  
 1.13  
 Flow rate\*Injection Speed\*Injection pressure\*Viscosity  
 0.91  
 Flow rate\*Injection Speed\*Melting temperature\*Viscosity  
 1.66  
 Flow rate\*Injection pressure\*Melting temperature\*Viscosity  
 0.94  
 Flow rate\*Injection Speed\*Injection pressure\*Screw speed  
 0.87  
 Flow rate\*Injection Speed\*Melting temperature\*Screw speed  
 1.99  
 Flow rate\*Injection pressure\*Melting temperature\*Screw speed  
 0.74  
 Flow rate\*Injection Speed\*Viscosity\*Screw speed  
 2.19  
 Flow rate\*Injection pressure\*Viscosity\*Screw speed  
 0.58  
 Flow rate\*Melting temperature\*Viscosity\*Screw speed  
 2.32  
 Injection Speed\*Injection pressure\*Melting temperature\*Viscosity  
 0.91  
 Injection Speed\*Injection pressure\*Melting temperature\*Screw speed  
 0.99

Injection Speed\*Injection pressure\*Viscosity\*Screw speed  
 0.80  
 Injection Speed\*Melting temperature\*Viscosity\*Screw speed  
 2.36  
 Injection pressure\*Melting temperature\*Viscosity\*Screw speed  
 0.66  
 5-Way Interactions  
 0.80  
 Flow rate\*Injection Speed\*Injection pressure\*Melting temperature\*Viscosity  
 0.91  
 Flow rate\*Injection Speed\*Injection pressure\*Melting temperature\*Screw speed  
 0.99  
 Flow rate\*Injection Speed\*Injection pressure\*Viscosity\*Screw speed  
 0.80  
 Flow rate\*Injection Speed\*Melting temperature\*Viscosity\*Screw speed  
 2.38  
 Flow rate\*Injection pressure\*Melting temperature\*Viscosity\*Screw speed  
 0.66  
 Injection Speed\*Injection pressure\*Melting temperature\*Viscosity\*Screw speed  
 0.88  
 6-Way Interactions  
 0.88  
 Flow rate\*Injection Speed\*Injection pressure\*Melting  
 temperature\*Viscosity\*Screw speed 0.88  
 Residual Error  
 Total

Source  
 P  
 Main Effects  
 0.692  
 Flow rate  
 0.218  
 Injection Speed  
 0.235  
 Injection pressure  
 0.311  
 Melting temperature  
 0.211  
 Viscosity  
 0.218  
 Screw speed  
 0.225  
 2-Way Interactions  
 0.819  
 Flow rate\*Injection Speed  
 0.235  
 Flow rate\*Injection pressure  
 0.311  
 Flow rate\*Melting temperature  
 0.211  
 Flow rate\*Viscosity  
 0.218  
 Flow rate\*Screw speed  
 0.224  
 Injection Speed\*Injection pressure  
 0.321  
 Injection Speed\*Melting temperature  
 0.228  
 Injection Speed\*Viscosity  
 0.236  
 Injection Speed\*Screw speed  
 0.212

Injection pressure\*Melting temperature  
 0.308  
 Injection pressure\*Viscosity  
 0.357  
 Injection pressure\*Screw speed  
 0.446  
 Melting temperature\*Viscosity  
 0.214  
 Melting temperature\*Screw speed  
 0.206  
 Viscosity\*Screw speed  
 0.180  
 3-Way Interactions  
 0.746  
 Flow rate\*Injection Speed\*Injection pressure  
 0.320  
 Flow rate\*Injection Speed\*Melting temperature  
 0.227  
 Flow rate\*Injection pressure\*Melting temperature  
 0.308  
 Flow rate\*Injection Speed\*Viscosity  
 0.235  
 Flow rate\*Injection pressure\*Viscosity  
 0.357  
 Flow rate\*Melting temperature\*Viscosity  
 0.214  
 Flow rate\*Injection Speed\*Screw speed  
 0.211  
 Flow rate\*Injection pressure\*Screw speed  
 0.445  
 Flow rate\*Melting temperature\*Screw speed  
 0.205  
 Flow rate\*Viscosity\*Screw speed  
 0.178  
 Injection Speed\*Injection pressure\*Melting temperature  
 0.317  
 Injection Speed\*Injection pressure\*Viscosity  
 0.365  
 Injection Speed\*Melting temperature\*Viscosity  
 0.231  
 Injection Speed\*Injection pressure\*Screw speed  
 0.376  
 Injection Speed\*Melting temperature\*Screw speed  
 0.194  
 Injection Speed\*Viscosity\*Screw speed  
 0.175  
 Injection pressure\*Melting temperature\*Viscosity  
 0.359  
 Injection pressure\*Melting temperature\*Screw speed  
 0.414  
 Injection pressure\*Viscosity\*Screw speed  
 0.465  
 Melting temperature\*Viscosity\*Screw speed  
 0.163  
 4-Way Interactions  
 0.670  
 Flow rate\*Injection Speed\*Injection pressure\*Melting temperature  
 0.316  
 Flow rate\*Injection Speed\*Injection pressure\*Viscosity  
 0.364  
 Flow rate\*Injection Speed\*Melting temperature\*Viscosity  
 0.230

Flow rate\*Injection pressure\*Melting temperature\*Viscosity  
 0.358  
 Flow rate\*Injection Speed\*Injection pressure\*Screw speed  
 0.375  
 Flow rate\*Injection Speed\*Melting temperature\*Screw speed  
 0.192  
 Flow rate\*Injection pressure\*Melting temperature\*Screw speed  
 0.413  
 Flow rate\*Injection Speed\*Viscosity\*Screw speed  
 0.173  
 Flow rate\*Injection pressure\*Viscosity\*Screw speed  
 0.465  
 Flow rate\*Melting temperature\*Viscosity\*Screw speed  
 0.162  
 Injection Speed\*Injection pressure\*Melting temperature\*Viscosity  
 0.365  
 Injection Speed\*Injection pressure\*Melting temperature\*Screw speed  
 0.347  
 Injection Speed\*Injection pressure\*Viscosity\*Screw speed  
 0.395  
 Injection Speed\*Melting temperature\*Viscosity\*Screw speed  
 0.159  
 Injection pressure\*Melting temperature\*Viscosity\*Screw speed  
 0.437  
 5-Way Interactions  
 0.593  
 Flow rate\*Injection Speed\*Injection pressure\*Melting temperature\*Viscosity  
 0.364  
 Flow rate\*Injection Speed\*Injection pressure\*Melting temperature\*Screw speed  
 0.346  
 Flow rate\*Injection Speed\*Injection pressure\*Viscosity\*Screw speed  
 0.395  
 Flow rate\*Injection Speed\*Melting temperature\*Viscosity\*Screw speed  
 0.158  
 Flow rate\*Injection pressure\*Melting temperature\*Viscosity\*Screw speed  
 0.437  
 Injection Speed\*Injection pressure\*Melting temperature\*Viscosity\*Screw speed  
 0.372  
 6-Way Interactions  
 0.372  
 Flow rate\*Injection Speed\*Injection pressure\*Melting  
 temperature\*Viscosity\*Screw speed 0.372  
 Residual Error  
 Total

#### Unusual Observations for Black dots

| Obs | StdOrder | Black dots | Fit     | SE Fit | Residual | St Resid |
|-----|----------|------------|---------|--------|----------|----------|
| 1   | 1        | 13.0000    | 13.1343 | 8.1393 | -0.1343  | -2.29RX  |
| 2   | 2        | 22.0000    | 21.1108 | 8.0996 | 0.8892   | 1.10 X   |
| 4   | 4        | 18.0000    | 18.0532 | 8.1293 | -0.0532  | -0.13 X  |
| 5   | 5        | 32.0000    | 32.1230 | 8.1347 | -0.1230  | -0.44 X  |
| 7   | 7        | 9.0000     | 8.9726  | 8.1223 | 0.0274   | 0.05 X   |
| 19  | 19       | 4.0000     | 3.1653  | 8.1246 | 0.8347   | 1.70 X   |
| 36  | 36       | 34.0000    | 28.8611 | 7.8994 | 5.1389   | 2.62R    |
| 38  | 38       | 19.0000    | 19.4668 | 8.1277 | -0.4668  | -1.06 X  |
| 41  | 41       | 12.0000    | 18.8870 | 7.5292 | -6.8870  | -2.23R   |
| 46  | 46       | 9.0000     | 21.9366 | 5.2388 | -12.9366 | -2.08R   |
| 56  | 56       | 22.0101    | 22.3179 | 8.1245 | -0.3078  | -0.62 X  |
| 57  | 57       | 22.0000    | 22.0270 | 8.1220 | -0.0270  | -0.05 X  |
| 58  | 58       | 28.0000    | 27.8626 | 8.1342 | 0.1374   | 0.47 X   |
| 59  | 59       | 24.0000    | 24.5517 | 8.1013 | -0.5517  | -0.70 X  |

|    |    |         |         |        |         |         |
|----|----|---------|---------|--------|---------|---------|
| 60 | 60 | 16.0000 | 16.0368 | 8.1389 | -0.0368 | -0.35 X |
| 61 | 61 | 23.0000 | 23.0571 | 8.1374 | -0.0571 | -0.30 X |
| 62 | 62 | 17.0000 | 18.1700 | 8.1107 | -1.1700 | -1.71 X |
| 63 | 63 | 6.0000  | 5.8443  | 8.1365 | 0.1557  | 0.70 X  |
| 68 | 68 | 7.0000  | 5.9893  | 8.1267 | 1.0107  | 2.21RX  |
| 69 | 69 | 26.0000 | 26.4986 | 8.1315 | -0.4986 | -1.38 X |
| 70 | 70 | 45.0000 | 44.7613 | 8.1362 | 0.2387  | 1.03 X  |
| 71 | 71 | 5.0000  | 4.4397  | 8.1338 | 0.5603  | 1.83 X  |
| 72 | 72 | 8.0000  | 8.8166  | 8.1182 | -0.8166 | -1.39 X |
| 73 | 73 | 3.0000  | 3.0722  | 8.1392 | -0.0722 | -1.03 X |

R denotes an observation with a large standardized residual.

X denotes an observation whose X value gives it large leverage.

Estimated Coefficients for Black dots using data in uncoded units

| Term                                | Coef     |
|-------------------------------------|----------|
| Constant                            | -2520966 |
| Flow rate                           | 797581   |
| Injection Speed                     | 124942   |
| Injection pressure                  | 8772.8   |
| Melting temperature                 | 11196.5  |
| Viscosity                           | 1793642  |
| Screw speed                         | 247267   |
| Flow rate*Injection Speed           | -39304.0 |
| Flow rate*Injection pressure        | -1317.4  |
| Flow rate*Melting temperature       | -3549.25 |
| Flow rate*Viscosity                 | -623369  |
| Flow rate*Screw speed               | -93272.2 |
| Injection Speed*Injection pressure  | -696.93  |
| Injection Speed*Melting temperature | -552.095 |
| Injection Speed*Viscosity           | -89627.6 |
| Injection Speed*Screw speed         | -11824.8 |
| Injection pressure*                 | -42.427  |
| Melting temperature                 |          |
| Injection pressure*Viscosity        | -8431.0  |
| Injection pressure*Screw speed      | -1269.47 |
| Melting temperature*Viscosity       | -7980.14 |
| Melting temperature*Screw speed     | -1078.15 |
| Viscosity*Screw speed               | -179524  |
| Flow rate*Injection Speed*          | 166.342  |
| Injection pressure                  |          |
| Flow rate*Injection Speed*          | 173.854  |
| Melting temperature                 |          |
| Flow rate*Injection pressure*       | 7.2552   |
| Melting temperature                 |          |
| Flow rate*Injection Speed*Viscosity | 30692.8  |
| Flow rate*Injection pressure*       | 2527.8   |
| Viscosity                           |          |
| Flow rate*Melting temperature*      | 2770.69  |
| Viscosity                           |          |
| Flow rate*Injection Speed*          | 4370.04  |
| Screw speed                         |          |
| Flow rate*Injection pressure*       | 403.19   |
| Screw speed                         |          |
| Flow rate*Melting temperature*      | 405.415  |
| Screw speed                         |          |
| Flow rate*Viscosity*Screw speed     | 72491.1  |
| Injection Speed*Injection pressure* | 3.1949   |
| Melting temperature                 |          |
| Injection Speed*Injection pressure* | 583.51   |
| Viscosity                           |          |

|                                                                                      |           |
|--------------------------------------------------------------------------------------|-----------|
| Injection Speed*Melting temperature*<br>Viscosity                                    | 396.641   |
| Injection Speed*Injection pressure*<br>Screw speed                                   | 74.592    |
| Injection Speed*Melting temperature*<br>Screw speed                                  | 51.4613   |
| Injection Speed*Viscosity*<br>Screw speed                                            | 8643.08   |
| Injection pressure*<br>Melting temperature*Viscosity                                 | 39.873    |
| Injection pressure*<br>Melting temperature*Screw speed                               | 5.6339    |
| Injection pressure*Viscosity*<br>Screw speed                                         | 1230.83   |
| Melting temperature*Viscosity*<br>Screw speed                                        | 783.289   |
| Flow rate*Injection Speed*<br>Injection pressure*<br>Melting temperature             | -0.78003  |
| Flow rate*Injection Speed*<br>Injection pressure*Viscosity                           | -183.795  |
| Flow rate*Injection Speed*<br>Melting temperature*Viscosity                          | -135.704  |
| Flow rate*Injection pressure*<br>Melting temperature*Viscosity                       | -12.0989  |
| Flow rate*Injection Speed*<br>Injection pressure*Screw speed                         | -23.9743  |
| Flow rate*Injection Speed*<br>Melting temperature*Screw speed                        | -18.9610  |
| Flow rate*Injection pressure*<br>Melting temperature*Screw speed                     | -1.78809  |
| Flow rate*Injection Speed*Viscosity*<br>Screw speed                                  | -3405.01  |
| Flow rate*Injection pressure*<br>Viscosity*Screw speed                               | -491.212  |
| Flow rate*Melting temperature*<br>Viscosity*Screw speed                              | -314.823  |
| Injection Speed*Injection pressure*<br>Melting temperature*Viscosity                 | -2.66271  |
| Injection Speed*Injection pressure*<br>Melting temperature*Screw speed               | -0.328170 |
| Injection Speed*Injection pressure*<br>Viscosity*Screw speed                         | -67.558   |
| Injection Speed*Melting temperature*<br>Viscosity*Screw speed                        | -37.6345  |
| Injection pressure*<br>Melting temperature*Viscosity*<br>Screw speed                 | -5.43563  |
| Flow rate*Injection Speed*<br>Injection pressure*<br>Melting temperature*Viscosity   | 0.84142   |
| Flow rate*Injection Speed*<br>Injection pressure*<br>Melting temperature*Screw speed | 0.105257  |
| Flow rate*Injection Speed*<br>Injection pressure*Viscosity*<br>Screw speed           | 25.9833   |
| Flow rate*Injection Speed*<br>Melting temperature*Viscosity*<br>Screw speed          | 14.7653   |
| Flow rate*Injection pressure*<br>Melting temperature*Viscosity*<br>Screw speed       | 2.15340   |

|                                     |           |
|-------------------------------------|-----------|
| Injection Speed*Injection pressure* | 0.296556  |
| Melting temperature*Viscosity*      |           |
| Screw speed                         |           |
| Flow rate*Injection Speed*          | -0.113405 |
| Injection pressure*                 |           |
| Melting temperature*Viscosity*      |           |
| Screw speed                         |           |

## Effects Pareto for Black dots

\* NOTE \* Some factors have more than 2 levels, no alias table was printed.

## Factorial Fit: Bubbles versus Flow rate, Injection Speed, ...

\* NOTE \* This design has some botched runs. It will be analyzed using a regression approach.

Estimated Effects and Coefficients for Bubbles (coded units)

| Term                                | Effect     | Coef      | SE Coef   | T     |
|-------------------------------------|------------|-----------|-----------|-------|
| Constant                            |            | 676089693 | 289352422 | 2.34  |
| Flow rate                           | 820447079  | 410223540 | 175454492 | 2.34  |
| Injection Speed                     | -16696764  | -8348382  | 3668298   | -2.28 |
| Injection pressure                  | -59558319  | -29779160 | 17443213  | -1.71 |
| Melting temperature                 | -49972005  | -24986002 | 10351772  | -2.41 |
| Viscosity                           | 675659242  | 337829621 | 131915266 | 2.56  |
| Screw speed                         | 1429652426 | 714826213 | 461355969 | 1.55  |
| Flow rate*Injection Speed           | -10132996  | -5066498  | 2223851   | -2.28 |
| Flow rate*Injection pressure        | -36136329  | -18068164 | 10577666  | -1.71 |
| Flow rate*Melting temperature       | -30321316  | -15160658 | 6277305   | -2.42 |
| Flow rate*Viscosity                 | 409924232  | 204962116 | 79963914  | 2.56  |
| Flow rate*Screw speed               | 869901501  | 434950751 | 279523131 | 1.56  |
| Injection Speed*Injection pressure  | 742234     | 371117    | 219845    | 1.69  |
| Injection Speed*Melting temperature | 616778     | 308389    | 131051    | 2.35  |
| Injection Speed*Viscosity           | -8320819   | -4160409  | 1670938   | -2.49 |
| Injection Speed*Screw speed         | -18561847  | -9280923  | 5648837   | -1.64 |
| Injection pressure*                 | 2209167    | 1104583   | 626021    | 1.76  |
| Melting temperature                 |            |           |           |       |
| Injection pressure*Viscosity        | -29928977  | -14964489 | 8146637   | -1.84 |
| Injection pressure*Screw speed      | 29410841   | 14705421  | 27613086  | 0.53  |
| Melting temperature*Viscosity       | -24955148  | -12477574 | 4749073   | -2.63 |
| Melting temperature*Screw speed     | -56474167  | -28237083 | 16366293  | -1.73 |
| Viscosity*Screw speed               | 744345049  | 372172525 | 187771385 | 1.98  |
| Flow rate*Injection Speed*          | 450449     | 225224    | 133269    | 1.69  |
| Injection pressure                  |            |           |           |       |
| Flow rate*Injection Speed*          | 374316     | 187158    | 79452     | 2.36  |
| Melting temperature                 |            |           |           |       |
| Flow rate*Injection pressure*       | 1340396    | 670198    | 379658    | 1.77  |
| Melting temperature                 |            |           |           |       |
| Flow rate*Injection Speed*Viscosity | -5049173   | -2524586  | 1012676   | -2.49 |
| Flow rate*Injection pressure*       | -18156712  | -9078356  | 4940199   | -1.84 |
| Viscosity                           |            |           |           |       |
| Flow rate*Melting temperature*      | -15140482  | -7570241  | 2878899   | -2.63 |
| Viscosity                           |            |           |           |       |
| Flow rate*Injection Speed*          | -11295556  | -5647778  | 3421446   | -1.65 |
| Screw speed                         |            |           |           |       |
| Flow rate*Injection pressure*       | 17809250   | 8904625   | 16757310  | 0.53  |



|                                      |           |           |           |       |
|--------------------------------------|-----------|-----------|-----------|-------|
| Screw speed                          |           |           |           |       |
| Flow rate*Melting temperature*       | -34358022 | -17179011 | 9919188   | -1.73 |
| Screw speed                          |           |           |           |       |
| Flow rate*Viscosity*Screw speed      | 452712825 | 226356412 | 113737359 | 1.99  |
| Injection Speed*Injection pressure*  | -27529    | -13765    | 7879      | -1.75 |
| Melting temperature                  |           |           |           |       |
| Injection Speed*Injection pressure*  | 371150    | 185575    | 102187    | 1.82  |
| Viscosity                            |           |           |           |       |
| Injection Speed*Melting temperature* | 307230    | 153615    | 60039     | 2.56  |
| Viscosity                            |           |           |           |       |
| Injection Speed*Injection pressure*  | -206095   | -103047   | 335853    | -0.31 |
| Screw speed                          |           |           |           |       |
| Injection Speed*Melting temperature* | 727162    | 363581    | 200264    | 1.82  |
| Screw speed                          |           |           |           |       |
| Injection Speed*Viscosity*           | -9593946  | -4796973  | 2337690   | -2.05 |
| Screw speed                          |           |           |           |       |
| Injection pressure*                  | 1109045   | 554523    | 295070    | 1.88  |
| Melting temperature*Viscosity        |           |           |           |       |
| Injection pressure*                  | -800656   | -400328   | 964896    | -0.41 |
| Melting temperature*Screw speed      |           |           |           |       |
| Injection pressure*Viscosity*        | 9811125   | 4905563   | 11910879  | 0.41  |
| Screw speed                          |           |           |           |       |
| Melting temperature*Viscosity*       | -29121127 | -14560563 | 6686824   | -2.18 |
| Screw speed                          |           |           |           |       |
| Flow rate*Injection Speed*           | -16707    | -8353     | 4777      | -1.75 |
| Injection pressure*                  |           |           |           |       |
| Melting temperature                  |           |           |           |       |
| Flow rate*Injection Speed*           | 225206    | 112603    | 61949     | 1.82  |
| Injection pressure*Viscosity         |           |           |           |       |
| Flow rate*Injection Speed*           | 186432    | 93216     | 36389     | 2.56  |
| Melting temperature*Viscosity        |           |           |           |       |
| Flow rate*Injection pressure*        | 672815    | 336407    | 178949    | 1.88  |
| Melting temperature*Viscosity        |           |           |           |       |
| Flow rate*Injection Speed*           | -124354   | -62177    | 203839    | -0.31 |
| Injection pressure*Screw speed       |           |           |           |       |
| Flow rate*Injection Speed*           | 442445    | 221222    | 121340    | 1.82  |
| Melting temperature*Screw speed      |           |           |           |       |
| Flow rate*Injection pressure*        | -484310   | -242155   | 585821    | -0.41 |
| Melting temperature*Screw speed      |           |           |           |       |
| Flow rate*Injection Speed*Viscosity* | -5835617  | -2917809  | 1415484   | -2.06 |
| Screw speed                          |           |           |           |       |
| Flow rate*Injection pressure*        | 5945009   | 2972504   | 7236644   | 0.41  |
| Viscosity*Screw speed                |           |           |           |       |
| Flow rate*Melting temperature*       | -17709944 | -8854972  | 4052094   | -2.19 |
| Viscosity*Screw speed                |           |           |           |       |
| Injection Speed*Injection pressure*  | -13756    | -6878     | 3695      | -1.86 |
| Melting temperature*Viscosity        |           |           |           |       |
| Injection Speed*Injection pressure*  | 4332      | 2166      | 11785     | 0.18  |
| Melting temperature*Screw speed      |           |           |           |       |
| Injection Speed*Injection pressure*  | -49104    | -24552    | 147934    | -0.17 |
| Viscosity*Screw speed                |           |           |           |       |
| Injection Speed*Melting temperature* | 372822    | 186411    | 83221     | 2.24  |
| Viscosity*Screw speed                |           |           |           |       |
| Injection pressure*                  | -235229   | -117614   | 420297    | -0.28 |
| Melting temperature*Viscosity*       |           |           |           |       |
| Screw speed                          |           |           |           |       |
| Flow rate*Injection Speed*           | -8347     | -4173     | 2240      | -1.86 |
| Injection pressure*                  |           |           |           |       |
| Melting temperature*Viscosity        |           |           |           |       |
| Flow rate*Injection Speed*           | 2601      | 1301      | 7157      | 0.18  |
| Injection pressure*                  |           |           |           |       |
| Melting temperature*Screw speed      |           |           |           |       |
| Flow rate*Injection Speed*           | -29589    | -14795    | 89902     | -0.16 |

|                                     |         |        |        |       |
|-------------------------------------|---------|--------|--------|-------|
| Injection pressure*Viscosity*       |         |        |        |       |
| Screw speed                         |         |        |        |       |
| Flow rate*Injection Speed*          | 226753  | 113376 | 50413  | 2.25  |
| Melting temperature*Viscosity*      |         |        |        |       |
| Screw speed                         |         |        |        |       |
| Flow rate*Injection pressure*       | -142348 | -71174 | 255500 | -0.28 |
| Melting temperature*Viscosity*      |         |        |        |       |
| Screw speed                         |         |        |        |       |
| Injection Speed*Injection pressure* | 349     | 175    | 5254   | 0.03  |
| Melting temperature*Viscosity*      |         |        |        |       |
| Screw speed                         |         |        |        |       |
| Flow rate*Injection Speed*          | 203     | 102    | 3195   | 0.03  |
| Injection pressure*                 |         |        |        |       |
| Melting temperature*Viscosity*      |         |        |        |       |
| Screw speed                         |         |        |        |       |

| Term                                 | P     |
|--------------------------------------|-------|
| Constant                             | 0.044 |
| Flow rate                            | 0.044 |
| Injection Speed                      | 0.049 |
| Injection pressure                   | 0.122 |
| Melting temperature                  | 0.039 |
| Viscosity                            | 0.031 |
| Screw speed                          | 0.156 |
| Flow rate*Injection Speed            | 0.049 |
| Flow rate*Injection pressure         | 0.122 |
| Flow rate*Melting temperature        | 0.039 |
| Flow rate*Viscosity                  | 0.031 |
| Flow rate*Screw speed                | 0.154 |
| Injection Speed*Injection pressure   | 0.126 |
| Injection Speed*Melting temperature  | 0.043 |
| Injection Speed*Viscosity            | 0.034 |
| Injection Speed*Screw speed          | 0.135 |
| Injection pressure*                  | 0.111 |
| Melting temperature                  |       |
| Injection pressure*Viscosity         | 0.099 |
| Injection pressure*Screw speed       | 0.607 |
| Melting temperature*Viscosity        | 0.027 |
| Melting temperature*Screw speed      | 0.119 |
| Viscosity*Screw speed                | 0.079 |
| Flow rate*Injection Speed*           | 0.125 |
| Injection pressure                   |       |
| Flow rate*Injection Speed*           | 0.043 |
| Melting temperature                  |       |
| Flow rate*Injection pressure*        | 0.111 |
| Melting temperature                  |       |
| Flow rate*Injection Speed*Viscosity  | 0.034 |
| Flow rate*Injection pressure*        | 0.099 |
| Viscosity                            |       |
| Flow rate*Melting temperature*       | 0.027 |
| Viscosity                            |       |
| Flow rate*Injection Speed*           | 0.133 |
| Screw speed                          |       |
| Flow rate*Injection pressure*        | 0.608 |
| Screw speed                          |       |
| Flow rate*Melting temperature*       | 0.117 |
| Screw speed                          |       |
| Flow rate*Viscosity*Screw speed      | 0.078 |
| Injection Speed*Injection pressure*  | 0.115 |
| Melting temperature                  |       |
| Injection Speed*Injection pressure*  | 0.103 |
| Viscosity                            |       |
| Injection Speed*Melting temperature* | 0.031 |

|                                      |       |
|--------------------------------------|-------|
| Viscosity                            |       |
| Injection Speed*Injection pressure*  | 0.766 |
| Screw speed                          |       |
| Injection Speed*Melting temperature* | 0.103 |
| Screw speed                          |       |
| Injection Speed*Viscosity*           | 0.070 |
| Screw speed                          |       |
| Injection pressure*                  | 0.093 |
| Melting temperature*Viscosity        |       |
| Injection pressure*                  | 0.688 |
| Melting temperature*Screw speed      |       |
| Injection pressure*Viscosity*        | 0.690 |
| Screw speed                          |       |
| Melting temperature*Viscosity*       | 0.057 |
| Screw speed                          |       |
| Flow rate*Injection Speed*           | 0.114 |
| Injection pressure*                  |       |
| Melting temperature                  |       |
| Flow rate*Injection Speed*           | 0.102 |
| Injection pressure*Viscosity         |       |
| Flow rate*Injection Speed*           | 0.031 |
| Melting temperature*Viscosity        |       |
| Flow rate*Injection pressure*        | 0.093 |
| Melting temperature*Viscosity        |       |
| Flow rate*Injection Speed*           | 0.767 |
| Injection pressure*Screw speed       |       |
| Flow rate*Injection Speed*           | 0.102 |
| Melting temperature*Screw speed      |       |
| Flow rate*Injection pressure*        | 0.689 |
| Melting temperature*Screw speed      |       |
| Flow rate*Injection Speed*Viscosity* | 0.069 |
| Screw speed                          |       |
| Flow rate*Injection pressure*        | 0.691 |
| Viscosity*Screw speed                |       |
| Flow rate*Melting temperature*       | 0.057 |
| Viscosity*Screw speed                |       |
| Injection Speed*Injection pressure*  | 0.096 |
| Melting temperature*Viscosity        |       |
| Injection Speed*Injection pressure*  | 0.858 |
| Melting temperature*Screw speed      |       |
| Injection Speed*Injection pressure*  | 0.872 |
| Viscosity*Screw speed                |       |
| Injection Speed*Melting temperature* | 0.052 |
| Viscosity*Screw speed                |       |
| Injection pressure*                  | 0.786 |
| Melting temperature*Viscosity*       |       |
| Screw speed                          |       |
| Flow rate*Injection Speed*           | 0.095 |
| Injection pressure*                  |       |
| Melting temperature*Viscosity        |       |
| Flow rate*Injection Speed*           | 0.860 |
| Injection pressure*                  |       |
| Melting temperature*Screw speed      |       |
| Flow rate*Injection Speed*           | 0.873 |
| Injection pressure*Viscosity*        |       |
| Screw speed                          |       |
| Flow rate*Injection Speed*           | 0.051 |
| Melting temperature*Viscosity*       |       |
| Screw speed                          |       |
| Flow rate*Injection pressure*        | 0.787 |
| Melting temperature*Viscosity*       |       |
| Screw speed                          |       |
| Injection Speed*Injection pressure*  | 0.974 |

|                                |       |
|--------------------------------|-------|
| Melting temperature*Viscosity* |       |
| Screw speed                    |       |
| Flow rate*Injection Speed*     | 0.975 |
| Injection pressure*            |       |
| Melting temperature*Viscosity* |       |
| Screw speed                    |       |

S = 5.36548      PRESS = 3048194  
 R-Sq = 89.30%    R-Sq(pred) = 0.00%    R-Sq(adj) = 14.40%

Analysis of Variance for Bubbles (coded units)

|                                        |  |
|----------------------------------------|--|
| Source                                 |  |
| DF                                     |  |
| Main Effects                           |  |
| 6                                      |  |
| Flow rate                              |  |
| 1                                      |  |
| Injection Speed                        |  |
| 1                                      |  |
| Injection pressure                     |  |
| 1                                      |  |
| Melting temperature                    |  |
| 1                                      |  |
| Viscosity                              |  |
| 1                                      |  |
| Screw speed                            |  |
| 1                                      |  |
| 2-Way Interactions                     |  |
| 15                                     |  |
| Flow rate*Injection Speed              |  |
| 1                                      |  |
| Flow rate*Injection pressure           |  |
| 1                                      |  |
| Flow rate*Melting temperature          |  |
| 1                                      |  |
| Flow rate*Viscosity                    |  |
| 1                                      |  |
| Flow rate*Screw speed                  |  |
| 1                                      |  |
| Injection Speed*Injection pressure     |  |
| 1                                      |  |
| Injection Speed*Melting temperature    |  |
| 1                                      |  |
| Injection Speed*Viscosity              |  |
| 1                                      |  |
| Injection Speed*Screw speed            |  |
| 1                                      |  |
| Injection pressure*Melting temperature |  |
| 1                                      |  |
| Injection pressure*Viscosity           |  |
| 1                                      |  |
| Injection pressure*Screw speed         |  |
| 1                                      |  |
| Melting temperature*Viscosity          |  |
| 1                                      |  |
| Melting temperature*Screw speed        |  |
| 1                                      |  |
| Viscosity*Screw speed                  |  |
| 1                                      |  |

### 3-Way Interactions

20

1 Flow rate\*Injection Speed\*Injection pressure  
1 Flow rate\*Injection Speed\*Melting temperature  
1 Flow rate\*Injection pressure\*Melting temperature  
1 Flow rate\*Injection Speed\*Viscosity  
1 Flow rate\*Injection pressure\*Viscosity  
1 Flow rate\*Melting temperature\*Viscosity  
1 Flow rate\*Injection Speed\*Screw speed  
1 Flow rate\*Injection pressure\*Screw speed  
1 Flow rate\*Melting temperature\*Screw speed  
1 Flow rate\*Viscosity\*Screw speed  
1 Injection Speed\*Injection pressure\*Melting temperature  
1 Injection Speed\*Injection pressure\*Viscosity  
1 Injection Speed\*Melting temperature\*Viscosity  
1 Injection Speed\*Injection pressure\*Screw speed  
1 Injection Speed\*Melting temperature\*Screw speed  
1 Injection Speed\*Viscosity\*Screw speed  
1 Injection pressure\*Melting temperature\*Viscosity  
1 Injection pressure\*Melting temperature\*Screw speed  
1 Injection pressure\*Viscosity\*Screw speed  
1 Melting temperature\*Viscosity\*Screw speed

### 4-Way Interactions

15

1 Flow rate\*Injection Speed\*Injection pressure\*Melting temperature  
1 Flow rate\*Injection Speed\*Injection pressure\*Viscosity  
1 Flow rate\*Injection Speed\*Melting temperature\*Viscosity  
1 Flow rate\*Injection pressure\*Melting temperature\*Viscosity  
1 Flow rate\*Injection Speed\*Injection pressure\*Screw speed  
1 Flow rate\*Injection Speed\*Melting temperature\*Screw speed  
1 Flow rate\*Injection pressure\*Melting temperature\*Screw speed  
1 Flow rate\*Injection Speed\*Viscosity\*Screw speed  
1 Flow rate\*Injection pressure\*Viscosity\*Screw speed

1

```

Flow rate*Melting temperature*Viscosity*Screw speed
1
Injection Speed*Injection pressure*Melting temperature*Viscosity
1
Injection Speed*Injection pressure*Melting temperature*Screw speed
1
Injection Speed*Injection pressure*Viscosity*Screw speed
1
Injection Speed*Melting temperature*Viscosity*Screw speed
1
Injection pressure*Melting temperature*Viscosity*Screw speed
1
5-Way Interactions
6
Flow rate*Injection Speed*Injection pressure*Melting temperature*Viscosity
1
Flow rate*Injection Speed*Injection pressure*Melting temperature*Screw speed
1
Flow rate*Injection Speed*Injection pressure*Viscosity*Screw speed
1
Flow rate*Injection Speed*Melting temperature*Viscosity*Screw speed
1
Flow rate*Injection pressure*Melting temperature*Viscosity*Screw speed
1
Injection Speed*Injection pressure*Melting temperature*Viscosity*Screw speed
1
6-Way Interactions
1
Flow rate*Injection Speed*Injection pressure*Melting
temperature*Viscosity*Screw speed 1
Residual Error
9
Total
72

```

```

Source
Seq SS
Main Effects
432.96
Flow rate
57.68
Injection Speed
126.48
Injection pressure
23.83
Melting temperature
72.99
Viscosity
1.81
Screw speed
150.18
2-Way Interactions
374.88
Flow rate*Injection Speed
12.42
Flow rate*Injection pressure
65.46
Flow rate*Melting temperature
3.34
Flow rate*Viscosity
0.65
Flow rate*Screw speed
2.13

```

Injection Speed\*Injection pressure  
 41.04  
 Injection Speed\*Melting temperature  
 3.55  
 Injection Speed\*Viscosity  
 46.88  
 Injection Speed\*Screw speed  
 97.23  
 Injection pressure\*Melting temperature  
 18.75  
 Injection pressure\*Viscosity  
 61.54  
 Injection pressure\*Screw speed  
 0.00  
 Melting temperature\*Viscosity  
 7.31  
 Melting temperature\*Screw speed  
 13.35  
 Viscosity\*Screw speed  
 1.23  
 3-Way Interactions  
 695.00  
 Flow rate\*Injection Speed\*Injection pressure  
 49.56  
 Flow rate\*Injection Speed\*Melting temperature  
 9.32  
 Flow rate\*Injection pressure\*Melting temperature  
 23.89  
 Flow rate\*Injection Speed\*Viscosity  
 31.50  
 Flow rate\*Injection pressure\*Viscosity  
 0.04  
 Flow rate\*Melting temperature\*Viscosity  
 3.27  
 Flow rate\*Injection Speed\*Screw speed  
 32.74  
 Flow rate\*Injection pressure\*Screw speed  
 29.57  
 Flow rate\*Melting temperature\*Screw speed  
 1.24  
 Flow rate\*Viscosity\*Screw speed  
 10.13  
 Injection Speed\*Injection pressure\*Melting temperature  
 2.06  
 Injection Speed\*Injection pressure\*Viscosity  
 1.22  
 Injection Speed\*Melting temperature\*Viscosity  
 109.98  
 Injection Speed\*Injection pressure\*Screw speed  
 151.73  
 Injection Speed\*Melting temperature\*Screw speed  
 28.32  
 Injection Speed\*Viscosity\*Screw speed  
 47.45  
 Injection pressure\*Melting temperature\*Viscosity  
 41.02  
 Injection pressure\*Melting temperature\*Screw speed  
 1.78  
 Injection pressure\*Viscosity\*Screw speed  
 119.98  
 Melting temperature\*Viscosity\*Screw speed  
 0.19

#### 4-Way Interactions

362.07  
Flow rate\*Injection Speed\*Injection pressure\*Melting temperature  
6.90  
Flow rate\*Injection Speed\*Injection pressure\*Viscosity  
1.64  
Flow rate\*Injection Speed\*Melting temperature\*Viscosity  
26.42  
Flow rate\*Injection pressure\*Melting temperature\*Viscosity  
11.05  
Flow rate\*Injection Speed\*Injection pressure\*Screw speed  
14.25  
Flow rate\*Injection Speed\*Melting temperature\*Screw speed  
38.67  
Flow rate\*Injection pressure\*Melting temperature\*Screw speed  
0.08  
Flow rate\*Injection Speed\*Viscosity\*Screw speed  
16.56  
Flow rate\*Injection pressure\*Viscosity\*Screw speed  
1.60  
Flow rate\*Melting temperature\*Viscosity\*Screw speed  
33.41  
Injection Speed\*Injection pressure\*Melting temperature\*Viscosity  
15.88  
Injection Speed\*Injection pressure\*Melting temperature\*Screw speed  
42.76  
Injection Speed\*Injection pressure\*Viscosity\*Screw speed  
70.29  
Injection Speed\*Melting temperature\*Viscosity\*Screw speed  
24.32  
Injection pressure\*Melting temperature\*Viscosity\*Screw speed  
58.26

#### 5-Way Interactions

297.47  
Flow rate\*Injection Speed\*Injection pressure\*Melting temperature\*Viscosity  
0.00  
Flow rate\*Injection Speed\*Injection pressure\*Melting temperature\*Screw speed  
0.06  
Flow rate\*Injection Speed\*Injection pressure\*Viscosity\*Screw speed  
77.20  
Flow rate\*Injection Speed\*Melting temperature\*Viscosity\*Screw speed  
127.49  
Flow rate\*Injection pressure\*Melting temperature\*Viscosity\*Screw speed  
92.28  
Injection Speed\*Injection pressure\*Melting temperature\*Viscosity\*Screw speed  
0.44

#### 6-Way Interactions

0.03  
Flow rate\*Injection Speed\*Injection pressure\*Melting temperature\*Viscosity\*Screw speed 0.03

Residual Error

259.10

Total

2421.51

Source

Adj SS

Main Effects

363.084

Flow rate

157.373

Injection Speed

149.105



Injection pressure  
83.905  
Melting temperature  
167.719  
Viscosity  
188.809  
Screw speed  
69.111  
2-Way Interactions  
487.207  
Flow rate\*Injection Speed  
149.425  
Flow rate\*Injection pressure  
83.997  
Flow rate\*Melting temperature  
167.922  
Flow rate\*Viscosity  
189.137  
Flow rate\*Screw speed  
69.705  
Injection Speed\*Injection pressure  
82.036  
Injection Speed\*Melting temperature  
159.416  
Injection Speed\*Viscosity  
178.471  
Injection Speed\*Screw speed  
77.711  
Injection pressure\*Melting temperature  
89.626  
Injection pressure\*Viscosity  
97.137  
Injection pressure\*Screw speed  
8.165  
Melting temperature\*Viscosity  
198.728  
Melting temperature\*Screw speed  
85.695  
Viscosity\*Screw speed  
113.096  
3-Way Interactions  
589.527  
Flow rate\*Injection Speed\*Injection pressure  
82.222  
Flow rate\*Injection Speed\*Melting temperature  
159.742  
Flow rate\*Injection pressure\*Melting temperature  
89.710  
Flow rate\*Injection Speed\*Viscosity  
178.919  
Flow rate\*Injection pressure\*Viscosity  
97.217  
Flow rate\*Melting temperature\*Viscosity  
199.060  
Flow rate\*Injection Speed\*Screw speed  
78.443  
Flow rate\*Injection pressure\*Screw speed  
8.129  
Flow rate\*Melting temperature\*Screw speed  
86.350  
Flow rate\*Viscosity\*Screw speed  
114.024

Injection Speed\*Injection pressure\*Melting temperature  
 87.867  
 Injection Speed\*Injection pressure\*Viscosity  
 94.944  
 Injection Speed\*Melting temperature\*Viscosity  
 188.460  
 Injection Speed\*Injection pressure\*Screw speed  
 2.710  
 Injection Speed\*Melting temperature\*Screw speed  
 94.889  
 Injection Speed\*Viscosity\*Screw speed  
 121.221  
 Injection pressure\*Melting temperature\*Viscosity  
 101.673  
 Injection pressure\*Melting temperature\*Screw speed  
 4.956  
 Injection pressure\*Viscosity\*Screw speed  
 4.883  
 Melting temperature\*Viscosity\*Screw speed  
 136.500  
 4-Way Interactions  
 478.964  
 Flow rate\*Injection Speed\*Injection pressure\*Melting temperature  
 88.047  
 Flow rate\*Injection Speed\*Injection pressure\*Viscosity  
 95.116  
 Flow rate\*Injection Speed\*Melting temperature\*Viscosity  
 188.915  
 Flow rate\*Injection pressure\*Melting temperature\*Viscosity  
 101.739  
 Flow rate\*Injection Speed\*Injection pressure\*Screw speed  
 2.679  
 Flow rate\*Injection Speed\*Melting temperature\*Screw speed  
 95.690  
 Flow rate\*Injection pressure\*Melting temperature\*Screw speed  
 4.919  
 Flow rate\*Injection Speed\*Viscosity\*Screw speed  
 122.327  
 Flow rate\*Injection pressure\*Viscosity\*Screw speed  
 4.857  
 Flow rate\*Melting temperature\*Viscosity\*Screw speed  
 137.478  
 Injection Speed\*Injection pressure\*Melting temperature\*Viscosity  
 99.755  
 Injection Speed\*Injection pressure\*Melting temperature\*Screw speed  
 0.972  
 Injection Speed\*Injection pressure\*Viscosity\*Screw speed  
 0.793  
 Injection Speed\*Melting temperature\*Viscosity\*Screw speed  
 144.444  
 Injection pressure\*Melting temperature\*Viscosity\*Screw speed  
 2.254  
 5-Way Interactions  
 294.998  
 Flow rate\*Injection Speed\*Injection pressure\*Melting temperature\*Viscosity  
 99.913  
 Flow rate\*Injection Speed\*Injection pressure\*Melting temperature\*Screw speed  
 0.951  
 Flow rate\*Injection Speed\*Injection pressure\*Viscosity\*Screw speed  
 0.780  
 Flow rate\*Injection Speed\*Melting temperature\*Viscosity\*Screw speed  
 145.605

|                                                                                        |       |
|----------------------------------------------------------------------------------------|-------|
| Flow rate*Injection pressure*Melting temperature*Viscosity*Screw speed                 |       |
| 2.234                                                                                  |       |
| Injection Speed*Injection pressure*Melting temperature*Viscosity*Screw speed           |       |
| 0.032                                                                                  |       |
| 6-Way Interactions                                                                     |       |
| 0.029                                                                                  |       |
| Flow rate*Injection Speed*Injection pressure*Melting temperature*Viscosity*Screw speed | 0.029 |
| Residual Error                                                                         |       |
| 259.096                                                                                |       |
| Total                                                                                  |       |
| Source                                                                                 |       |
| Adj MS                                                                                 |       |
| Main Effects                                                                           |       |
| 60.514                                                                                 |       |
| Flow rate                                                                              |       |
| 157.373                                                                                |       |
| Injection Speed                                                                        |       |
| 149.105                                                                                |       |
| Injection pressure                                                                     |       |
| 83.905                                                                                 |       |
| Melting temperature                                                                    |       |
| 167.719                                                                                |       |
| Viscosity                                                                              |       |
| 188.809                                                                                |       |
| Screw speed                                                                            |       |
| 69.111                                                                                 |       |
| 2-Way Interactions                                                                     |       |
| 32.480                                                                                 |       |
| Flow rate*Injection Speed                                                              |       |
| 149.425                                                                                |       |
| Flow rate*Injection pressure                                                           |       |
| 83.997                                                                                 |       |
| Flow rate*Melting temperature                                                          |       |
| 167.922                                                                                |       |
| Flow rate*Viscosity                                                                    |       |
| 189.137                                                                                |       |
| Flow rate*Screw speed                                                                  |       |
| 69.705                                                                                 |       |
| Injection Speed*Injection pressure                                                     |       |
| 82.036                                                                                 |       |
| Injection Speed*Melting temperature                                                    |       |
| 159.416                                                                                |       |
| Injection Speed*Viscosity                                                              |       |
| 178.471                                                                                |       |
| Injection Speed*Screw speed                                                            |       |
| 77.711                                                                                 |       |
| Injection pressure*Melting temperature                                                 |       |
| 89.626                                                                                 |       |
| Injection pressure*Viscosity                                                           |       |
| 97.137                                                                                 |       |
| Injection pressure*Screw speed                                                         |       |
| 8.165                                                                                  |       |
| Melting temperature*Viscosity                                                          |       |
| 198.728                                                                                |       |
| Melting temperature*Screw speed                                                        |       |
| 85.695                                                                                 |       |
| Viscosity*Screw speed                                                                  |       |
| 113.096                                                                                |       |
| 3-Way Interactions                                                                     |       |
| 29.476                                                                                 |       |

Flow rate\*Injection Speed\*Injection pressure  
 82.222  
 Flow rate\*Injection Speed\*Melting temperature  
 159.742  
 Flow rate\*Injection pressure\*Melting temperature  
 89.710  
 Flow rate\*Injection Speed\*Viscosity  
 178.919  
 Flow rate\*Injection pressure\*Viscosity  
 97.217  
 Flow rate\*Melting temperature\*Viscosity  
 199.060  
 Flow rate\*Injection Speed\*Screw speed  
 78.443  
 Flow rate\*Injection pressure\*Screw speed  
 8.129  
 Flow rate\*Melting temperature\*Screw speed  
 86.350  
 Flow rate\*Viscosity\*Screw speed  
 114.024  
 Injection Speed\*Injection pressure\*Melting temperature  
 87.867  
 Injection Speed\*Injection pressure\*Viscosity  
 94.944  
 Injection Speed\*Melting temperature\*Viscosity  
 188.460  
 Injection Speed\*Injection pressure\*Screw speed  
 2.710  
 Injection Speed\*Melting temperature\*Screw speed  
 94.889  
 Injection Speed\*Viscosity\*Screw speed  
 121.221  
 Injection pressure\*Melting temperature\*Viscosity  
 101.673  
 Injection pressure\*Melting temperature\*Screw speed  
 4.956  
 Injection pressure\*Viscosity\*Screw speed  
 4.883  
 Melting temperature\*Viscosity\*Screw speed  
 136.500  
 4-Way Interactions  
 31.931  
 Flow rate\*Injection Speed\*Injection pressure\*Melting temperature  
 88.047  
 Flow rate\*Injection Speed\*Injection pressure\*Viscosity  
 95.116  
 Flow rate\*Injection Speed\*Melting temperature\*Viscosity  
 188.915  
 Flow rate\*Injection pressure\*Melting temperature\*Viscosity  
 101.739  
 Flow rate\*Injection Speed\*Injection pressure\*Screw speed  
 2.679  
 Flow rate\*Injection Speed\*Melting temperature\*Screw speed  
 95.690  
 Flow rate\*Injection pressure\*Melting temperature\*Screw speed  
 4.919  
 Flow rate\*Injection Speed\*Viscosity\*Screw speed  
 122.327  
 Flow rate\*Injection pressure\*Viscosity\*Screw speed  
 4.857  
 Flow rate\*Melting temperature\*Viscosity\*Screw speed  
 137.478

Injection Speed\*Injection pressure\*Melting temperature\*Viscosity  
 99.755  
 Injection Speed\*Injection pressure\*Melting temperature\*Screw speed  
 0.972  
 Injection Speed\*Injection pressure\*Viscosity\*Screw speed  
 0.793  
 Injection Speed\*Melting temperature\*Viscosity\*Screw speed  
 144.444  
 Injection pressure\*Melting temperature\*Viscosity\*Screw speed  
 2.254  
 5-Way Interactions  
 49.166  
 Flow rate\*Injection Speed\*Injection pressure\*Melting temperature\*Viscosity  
 99.913  
 Flow rate\*Injection Speed\*Injection pressure\*Melting temperature\*Screw speed  
 0.951  
 Flow rate\*Injection Speed\*Injection pressure\*Viscosity\*Screw speed  
 0.780  
 Flow rate\*Injection Speed\*Melting temperature\*Viscosity\*Screw speed  
 145.605  
 Flow rate\*Injection pressure\*Melting temperature\*Viscosity\*Screw speed  
 2.234  
 Injection Speed\*Injection pressure\*Melting temperature\*Viscosity\*Screw speed  
 0.032  
 6-Way Interactions  
 0.029  
 Flow rate\*Injection Speed\*Injection pressure\*Melting  
 temperature\*Viscosity\*Screw speed 0.029  
 Residual Error  
 28.788  
 Total

#### Source

F

#### Main Effects

2.10

Flow rate

5.47

Injection Speed

5.18

Injection pressure

2.91

Melting temperature

5.83

Viscosity

6.56

Screw speed

2.40

#### 2-Way Interactions

1.13

Flow rate\*Injection Speed

5.19

Flow rate\*Injection pressure

2.92

Flow rate\*Melting temperature

5.83

Flow rate\*Viscosity

6.57

Flow rate\*Screw speed

2.42

Injection Speed\*Injection pressure

2.85

Injection Speed\*Melting temperature  
 5.54  
 Injection Speed\*Viscosity  
 6.20  
 Injection Speed\*Screw speed  
 2.70  
 Injection pressure\*Melting temperature  
 3.11  
 Injection pressure\*Viscosity  
 3.37  
 Injection pressure\*Screw speed  
 0.28  
 Melting temperature\*Viscosity  
 6.90  
 Melting temperature\*Screw speed  
 2.98  
 Viscosity\*Screw speed  
 3.93  
 3-Way Interactions  
 1.02  
 Flow rate\*Injection Speed\*Injection pressure  
 2.86  
 Flow rate\*Injection Speed\*Melting temperature  
 5.55  
 Flow rate\*Injection pressure\*Melting temperature  
 3.12  
 Flow rate\*Injection Speed\*Viscosity  
 6.21  
 Flow rate\*Injection pressure\*Viscosity  
 3.38  
 Flow rate\*Melting temperature\*Viscosity  
 6.91  
 Flow rate\*Injection Speed\*Screw speed  
 2.72  
 Flow rate\*Injection pressure\*Screw speed  
 0.28  
 Flow rate\*Melting temperature\*Screw speed  
 3.00  
 Flow rate\*Viscosity\*Screw speed  
 3.96  
 Injection Speed\*Injection pressure\*Melting temperature  
 3.05  
 Injection Speed\*Injection pressure\*Viscosity  
 3.30  
 Injection Speed\*Melting temperature\*Viscosity  
 6.55  
 Injection Speed\*Injection pressure\*Screw speed  
 0.09  
 Injection Speed\*Melting temperature\*Screw speed  
 3.30  
 Injection Speed\*Viscosity\*Screw speed  
 4.21  
 Injection pressure\*Melting temperature\*Viscosity  
 3.53  
 Injection pressure\*Melting temperature\*Screw speed  
 0.17  
 Injection pressure\*Viscosity\*Screw speed  
 0.17  
 Melting temperature\*Viscosity\*Screw speed  
 4.74  
 4-Way Interactions  
 1.11

|       |                                                                                        |      |
|-------|----------------------------------------------------------------------------------------|------|
|       | Flow rate*Injection Speed*Injection pressure*Melting temperature                       |      |
| 3.06  |                                                                                        |      |
|       | Flow rate*Injection Speed*Injection pressure*Viscosity                                 |      |
| 3.30  |                                                                                        |      |
|       | Flow rate*Injection Speed*Melting temperature*Viscosity                                |      |
| 6.56  |                                                                                        |      |
|       | Flow rate*Injection pressure*Melting temperature*Viscosity                             |      |
| 3.53  |                                                                                        |      |
|       | Flow rate*Injection Speed*Injection pressure*Screw speed                               |      |
| 0.09  |                                                                                        |      |
|       | Flow rate*Injection Speed*Melting temperature*Screw speed                              |      |
| 3.32  |                                                                                        |      |
|       | Flow rate*Injection pressure*Melting temperature*Screw speed                           |      |
| 0.17  |                                                                                        |      |
|       | Flow rate*Injection Speed*Viscosity*Screw speed                                        |      |
| 4.25  |                                                                                        |      |
|       | Flow rate*Injection pressure*Viscosity*Screw speed                                     |      |
| 0.17  |                                                                                        |      |
|       | Flow rate*Melting temperature*Viscosity*Screw speed                                    |      |
| 4.78  |                                                                                        |      |
|       | Injection Speed*Injection pressure*Melting temperature*Viscosity                       |      |
| 3.47  |                                                                                        |      |
|       | Injection Speed*Injection pressure*Melting temperature*Screw speed                     |      |
| 0.03  |                                                                                        |      |
|       | Injection Speed*Injection pressure*Viscosity*Screw speed                               |      |
| 0.03  |                                                                                        |      |
|       | Injection Speed*Melting temperature*Viscosity*Screw speed                              |      |
| 5.02  |                                                                                        |      |
|       | Injection pressure*Melting temperature*Viscosity*Screw speed                           |      |
| 0.08  |                                                                                        |      |
|       | 5-Way Interactions                                                                     |      |
| 1.71  |                                                                                        |      |
|       | Flow rate*Injection Speed*Injection pressure*Melting temperature*Viscosity             |      |
| 3.47  |                                                                                        |      |
|       | Flow rate*Injection Speed*Injection pressure*Melting temperature*Screw speed           |      |
| 0.03  |                                                                                        |      |
|       | Flow rate*Injection Speed*Injection pressure*Viscosity*Screw speed                     |      |
| 0.03  |                                                                                        |      |
|       | Flow rate*Injection Speed*Melting temperature*Viscosity*Screw speed                    |      |
| 5.06  |                                                                                        |      |
|       | Flow rate*Injection pressure*Melting temperature*Viscosity*Screw speed                 |      |
| 0.08  |                                                                                        |      |
|       | Injection Speed*Injection pressure*Melting temperature*Viscosity*Screw speed           |      |
| 0.00  |                                                                                        |      |
|       | 6-Way Interactions                                                                     |      |
| 0.00  |                                                                                        |      |
|       | Flow rate*Injection Speed*Injection pressure*Melting temperature*Viscosity*Screw speed | 0.00 |
|       | Residual Error                                                                         |      |
|       | Total                                                                                  |      |
|       | Source                                                                                 |      |
|       | P                                                                                      |      |
|       | Main Effects                                                                           |      |
| 0.152 |                                                                                        |      |
|       | Flow rate                                                                              |      |
| 0.044 |                                                                                        |      |
|       | Injection Speed                                                                        |      |
| 0.049 |                                                                                        |      |
|       | Injection pressure                                                                     |      |
| 0.122 |                                                                                        |      |
|       | Melting temperature                                                                    |      |
| 0.039 |                                                                                        |      |

Viscosity  
0.031  
Screw speed  
0.156  
2-Way Interactions  
0.442  
Flow rate\*Injection Speed  
0.049  
Flow rate\*Injection pressure  
0.122  
Flow rate\*Melting temperature  
0.039  
Flow rate\*Viscosity  
0.031  
Flow rate\*Screw speed  
0.154  
Injection Speed\*Injection pressure  
0.126  
Injection Speed\*Melting temperature  
0.043  
Injection Speed\*Viscosity  
0.034  
Injection Speed\*Screw speed  
0.135  
Injection pressure\*Melting temperature  
0.111  
Injection pressure\*Viscosity  
0.099  
Injection pressure\*Screw speed  
0.607  
Melting temperature\*Viscosity  
0.027  
Melting temperature\*Screw speed  
0.119  
Viscosity\*Screw speed  
0.079  
3-Way Interactions  
0.513  
Flow rate\*Injection Speed\*Injection pressure  
0.125  
Flow rate\*Injection Speed\*Melting temperature  
0.043  
Flow rate\*Injection pressure\*Melting temperature  
0.111  
Flow rate\*Injection Speed\*Viscosity  
0.034  
Flow rate\*Injection pressure\*Viscosity  
0.099  
Flow rate\*Melting temperature\*Viscosity  
0.027  
Flow rate\*Injection Speed\*Screw speed  
0.133  
Flow rate\*Injection pressure\*Screw speed  
0.608  
Flow rate\*Melting temperature\*Screw speed  
0.117  
Flow rate\*Viscosity\*Screw speed  
0.078  
Injection Speed\*Injection pressure\*Melting temperature  
0.115  
Injection Speed\*Injection pressure\*Viscosity  
0.103



Injection Speed\*Melting temperature\*Viscosity  
 0.031  
 Injection Speed\*Injection pressure\*Screw speed  
 0.766  
 Injection Speed\*Melting temperature\*Screw speed  
 0.103  
 Injection Speed\*Viscosity\*Screw speed  
 0.070  
 Injection pressure\*Melting temperature\*Viscosity  
 0.093  
 Injection pressure\*Melting temperature\*Screw speed  
 0.688  
 Injection pressure\*Viscosity\*Screw speed  
 0.690  
 Melting temperature\*Viscosity\*Screw speed  
 0.057  
 4-Way Interactions  
 0.453  
 Flow rate\*Injection Speed\*Injection pressure\*Melting temperature  
 0.114  
 Flow rate\*Injection Speed\*Injection pressure\*Viscosity  
 0.102  
 Flow rate\*Injection Speed\*Melting temperature\*Viscosity  
 0.031  
 Flow rate\*Injection pressure\*Melting temperature\*Viscosity  
 0.093  
 Flow rate\*Injection Speed\*Injection pressure\*Screw speed  
 0.767  
 Flow rate\*Injection Speed\*Melting temperature\*Screw speed  
 0.102  
 Flow rate\*Injection pressure\*Melting temperature\*Screw speed  
 0.689  
 Flow rate\*Injection Speed\*Viscosity\*Screw speed  
 0.069  
 Flow rate\*Injection pressure\*Viscosity\*Screw speed  
 0.691  
 Flow rate\*Melting temperature\*Viscosity\*Screw speed  
 0.057  
 Injection Speed\*Injection pressure\*Melting temperature\*Viscosity  
 0.096  
 Injection Speed\*Injection pressure\*Melting temperature\*Screw speed  
 0.858  
 Injection Speed\*Injection pressure\*Viscosity\*Screw speed  
 0.872  
 Injection Speed\*Melting temperature\*Viscosity\*Screw speed  
 0.052  
 Injection pressure\*Melting temperature\*Viscosity\*Screw speed  
 0.786  
 5-Way Interactions  
 0.226  
 Flow rate\*Injection Speed\*Injection pressure\*Melting temperature\*Viscosity  
 0.095  
 Flow rate\*Injection Speed\*Injection pressure\*Melting temperature\*Screw speed  
 0.860  
 Flow rate\*Injection Speed\*Injection pressure\*Viscosity\*Screw speed  
 0.873  
 Flow rate\*Injection Speed\*Melting temperature\*Viscosity\*Screw speed  
 0.051  
 Flow rate\*Injection pressure\*Melting temperature\*Viscosity\*Screw speed  
 0.787  
 Injection Speed\*Injection pressure\*Melting temperature\*Viscosity\*Screw speed  
 0.974

# 6-Way Interactions

0.975

Flow rate\*Injection Speed\*Injection pressure\*Melting

temperature\*Viscosity\*Screw speed 0.975

Residual Error

Total

## Unusual Observations for Bubbles

| Obs | StdOrder | Bubbles | Fit     | SE Fit | Residual | St Resid |
|-----|----------|---------|---------|--------|----------|----------|
| 1   | 1        | 16.0000 | 16.0845 | 5.3653 | -0.0845  | -2.18RX  |
| 2   | 2        | 15.0000 | 14.8886 | 5.3391 | 0.1114   | 0.21 X   |
| 4   | 4        | 19.0000 | 18.7430 | 5.3588 | 0.2570   | 0.96 X   |
| 5   | 5        | 22.0000 | 22.3113 | 5.3623 | -0.3113  | -1.69 X  |
| 7   | 7        | 8.0000  | 7.7749  | 5.3541 | 0.2251   | 0.64 X   |
| 8   | 8        | 13.0000 | 14.7095 | 5.3063 | -1.7095  | -2.15R   |
| 17  | 17       | 12.0000 | 13.5435 | 5.3103 | -1.5435  | -2.01R   |
| 19  | 19       | 8.0000  | 7.6176  | 5.3557 | 0.3824   | 1.18 X   |
| 38  | 38       | 14.0000 | 13.9225 | 5.3577 | 0.0775   | 0.27 X   |
| 43  | 43       | 11.0000 | 12.8690 | 5.2900 | -1.8690  | -2.08R   |
| 44  | 44       | 17.0000 | 14.1696 | 5.1766 | 2.8304   | 2.01R    |
| 45  | 45       | 7.0000  | 12.1805 | 4.7792 | -5.1805  | -2.12R   |
| 56  | 56       | 23.0000 | 22.7839 | 5.3556 | 0.2161   | 0.66 X   |
| 57  | 57       | 18.0000 | 18.2628 | 5.3539 | -0.2628  | -0.75 X  |
| 58  | 58       | 12.0000 | 11.9945 | 5.3620 | 0.0055   | 0.03 X   |
| 59  | 59       | 10.0000 | 10.8072 | 5.3403 | -0.8072  | -1.55 X  |
| 60  | 60       | 5.0000  | 5.0424  | 5.3650 | -0.0424  | -0.62 X  |
| 61  | 61       | 12.0000 | 12.0074 | 5.3640 | -0.0074  | -0.06 X  |
| 62  | 62       | 13.0000 | 13.4985 | 5.3464 | -0.4985  | -1.10 X  |
| 63  | 63       | 12.0000 | 11.7664 | 5.3635 | 0.2336   | 1.59 X   |
| 64  | 64       | 30.0000 | 22.8827 | 4.4204 | 7.1173   | 2.34R    |
| 65  | 65       | 8.0000  | 12.3766 | 4.9740 | -4.3766  | -2.18R   |
| 68  | 68       | 22.0000 | 21.5236 | 5.3570 | 0.4764   | 1.58 X   |
| 69  | 69       | 23.0000 | 23.1495 | 5.3602 | -0.1495  | -0.63 X  |
| 70  | 70       | 13.0000 | 12.9725 | 5.3633 | 0.0275   | 0.18 X   |
| 71  | 71       | 19.0000 | 18.8872 | 5.3617 | 0.1128   | 0.56 X   |
| 72  | 72       | 13.0000 | 13.0875 | 5.3514 | -0.0875  | -0.23 X  |
| 73  | 73       | 18.0000 | 18.0204 | 5.3653 | -0.0204  | -0.44 X  |

R denotes an observation with a large standardized residual.

X denotes an observation whose X value gives it large leverage.

## Estimated Coefficients for Bubbles using data in uncoded units

| Term                                | Coef     |
|-------------------------------------|----------|
| Constant                            | -2048417 |
| Flow rate                           | 590591   |
| Injection Speed                     | 102326   |
| Injection pressure                  | -30422.3 |
| Melting temperature                 | 9654.62  |
| Viscosity                           | 1047958  |
| Screw speed                         | 289067   |
| Flow rate*Injection Speed           | -31035.3 |
| Flow rate*Injection pressure        | 13577.8  |
| Flow rate*Melting temperature       | -2892.25 |
| Flow rate*Viscosity                 | -189540  |
| Flow rate*Screw speed               | -121079  |
| Injection Speed*Injection pressure  | 1122.31  |
| Injection Speed*Melting temperature | -476.377 |
| Injection Speed*Viscosity           | -54724.5 |
| Injection Speed*Screw speed         | -13691.9 |

|                                      |          |
|--------------------------------------|----------|
| Injection pressure*                  | 119.150  |
| Melting temperature                  |          |
| Injection pressure*Viscosity         | 23310.1  |
| Injection pressure*Screw speed       | -46.40   |
| Melting temperature*Viscosity        | -5153.25 |
| Melting temperature*Screw speed      | -1288.94 |
| Viscosity*Screw speed                | -161646  |
| Flow rate*Injection Speed*           | -506.951 |
| Injection pressure                   |          |
| Flow rate*Injection Speed*           | 148.611  |
| Melting temperature                  |          |
| Flow rate*Injection pressure*        | -53.7409 |
| Melting temperature                  |          |
| Flow rate*Injection Speed*Viscosity  | 11487.2  |
| Flow rate*Injection pressure*        | -11771.2 |
| Viscosity                            |          |
| Flow rate*Melting temperature*       | 1097.75  |
| Viscosity                            |          |
| Flow rate*Injection Speed*           | 5714.43  |
| Screw speed                          |          |
| Flow rate*Injection pressure*        | 109.043  |
| Screw speed                          |          |
| Flow rate*Melting temperature*       | 540.006  |
| Screw speed                          |          |
| Flow rate*Viscosity*Screw speed      | 61566.2  |
| Injection Speed*Injection pressure*  | -4.31904 |
| Melting temperature                  |          |
| Injection Speed*Injection pressure*  | -873.173 |
| Viscosity                            |          |
| Injection Speed*Melting temperature* | 262.995  |
| Viscosity                            |          |
| Injection Speed*Injection pressure*  | 16.034   |
| Screw speed                          |          |
| Injection Speed*Melting temperature* | 60.8614  |
| Screw speed                          |          |
| Injection Speed*Viscosity*           | 7821.21  |
| Screw speed                          |          |
| Injection pressure*                  | -91.3063 |
| Melting temperature*Viscosity        |          |
| Injection pressure*                  | 0.8269   |
| Melting temperature*Screw speed      |          |
| Injection pressure*Viscosity*        | -256.02  |
| Screw speed                          |          |
| Melting temperature*Viscosity*       | 730.672  |
| Screw speed                          |          |
| Flow rate*Injection Speed*           | 1.97837  |
| Injection pressure*                  |          |
| Melting temperature                  |          |
| Flow rate*Injection Speed*           | 459.567  |
| Injection pressure*Viscosity         |          |
| Flow rate*Injection Speed*           | -61.5089 |
| Melting temperature*Viscosity        |          |
| Flow rate*Injection pressure*        | 46.8316  |
| Melting temperature*Viscosity        |          |
| Flow rate*Injection Speed*           | -10.6129 |
| Injection pressure*Screw speed       |          |
| Flow rate*Injection Speed*           | -25.4087 |
| Melting temperature*Screw speed      |          |
| Flow rate*Injection pressure*        | -0.72464 |
| Melting temperature*Screw speed      |          |
| Flow rate*Injection Speed*Viscosity* | -2958.76 |
| Screw speed                          |          |
| Flow rate*Injection pressure*        | 149.368  |

|                                      |           |
|--------------------------------------|-----------|
| Viscosity*Screw speed                |           |
| Flow rate*Melting temperature*       | -280.245  |
| Viscosity*Screw speed                |           |
| Injection Speed*Injection pressure*  | 3.36993   |
| Melting temperature*Viscosity        |           |
| Injection Speed*Injection pressure*  | -0.096594 |
| Melting temperature*Screw speed      |           |
| Injection Speed*Injection pressure*  | 0.8146    |
| Viscosity*Screw speed                |           |
| Injection Speed*Melting temperature* | -35.1546  |
| Viscosity*Screw speed                |           |
| Injection pressure*                  | 0.61390   |
| Melting temperature*Viscosity*       |           |
| Screw speed                          |           |
| Flow rate*Injection Speed*           | -1.81302  |
| Injection pressure*                  |           |
| Melting temperature*Viscosity        |           |
| Flow rate*Injection Speed*           | 0.056873  |
| Injection pressure*                  |           |
| Melting temperature*Screw speed      |           |
| Flow rate*Injection Speed*           | -2.6844   |
| Injection pressure*Viscosity*        |           |
| Screw speed                          |           |
| Flow rate*Injection Speed*           | 13.3880   |
| Melting temperature*Viscosity*       |           |
| Screw speed                          |           |
| Flow rate*Injection pressure*        | -0.43444  |
| Melting temperature*Viscosity*       |           |
| Screw speed                          |           |
| Injection Speed*Injection pressure*  | 0.017615  |
| Melting temperature*Viscosity*       |           |
| Screw speed                          |           |
| Flow rate*Injection Speed*           | 0.0025316 |
| Injection pressure*                  |           |
| Melting temperature*Viscosity*       |           |
| Screw speed                          |           |

## Effects Pareto for Bubbles

\* NOTE \* Some factors have more than 2 levels, no alias table was printed.

## Results for: Worksheet 2

### Full Factorial Design

|          |    |                     |       |
|----------|----|---------------------|-------|
| Factors: | 6  | Base Design:        | 6, 64 |
| Runs:    | 64 | Replicates:         | 1     |
| Blocks:  | 1  | Center pts (total): | 0     |

All terms are free from aliasing.

## Factorial Fit: Blocks versus Flow\_Rate, Inj\_Speed, ...

Estimated Effects and Coefficients for Blocks (coded units)

| Term                                          | Effect  | Coef    |
|-----------------------------------------------|---------|---------|
| Constant                                      |         | 1.00000 |
| Flow_Rate                                     | 0.00000 | 0.00000 |
| Inj_Speed                                     | 0.00000 | 0.00000 |
| Inj_Press                                     | 0.00000 | 0.00000 |
| Melt_Temp                                     | 0.00000 | 0.00000 |
| Viscosity                                     | 0.00000 | 0.00000 |
| Screw_Speed                                   | 0.00000 | 0.00000 |
| Flow_Rate*Inj_Speed                           | 0.00000 | 0.00000 |
| Flow_Rate*Inj_Press                           | 0.00000 | 0.00000 |
| Flow_Rate*Melt_Temp                           | 0.00000 | 0.00000 |
| Flow_Rate*Viscosity                           | 0.00000 | 0.00000 |
| Flow_Rate*Screw_Speed                         | 0.00000 | 0.00000 |
| Inj_Speed*Inj_Press                           | 0.00000 | 0.00000 |
| Inj_Speed*Melt_Temp                           | 0.00000 | 0.00000 |
| Inj_Speed*Viscosity                           | 0.00000 | 0.00000 |
| Inj_Speed*Screw_Speed                         | 0.00000 | 0.00000 |
| Inj_Press*Melt_Temp                           | 0.00000 | 0.00000 |
| Inj_Press*Viscosity                           | 0.00000 | 0.00000 |
| Inj_Press*Screw_Speed                         | 0.00000 | 0.00000 |
| Melt_Temp*Viscosity                           | 0.00000 | 0.00000 |
| Melt_Temp*Screw_Speed                         | 0.00000 | 0.00000 |
| Viscosity*Screw_Speed                         | 0.00000 | 0.00000 |
| Flow_Rate*Inj_Speed*Inj_Press                 | 0.00000 | 0.00000 |
| Flow_Rate*Inj_Speed*Melt_Temp                 | 0.00000 | 0.00000 |
| Flow_Rate*Inj_Press*Melt_Temp                 | 0.00000 | 0.00000 |
| Flow_Rate*Inj_Speed*Viscosity                 | 0.00000 | 0.00000 |
| Flow_Rate*Inj_Press*Viscosity                 | 0.00000 | 0.00000 |
| Flow_Rate*Melt_Temp*Viscosity                 | 0.00000 | 0.00000 |
| Flow_Rate*Inj_Speed*Screw_Speed               | 0.00000 | 0.00000 |
| Flow_Rate*Inj_Press*Screw_Speed               | 0.00000 | 0.00000 |
| Flow_Rate*Melt_Temp*Screw_Speed               | 0.00000 | 0.00000 |
| Flow_Rate*Viscosity*Screw_Speed               | 0.00000 | 0.00000 |
| Inj_Speed*Inj_Press*Melt_Temp                 | 0.00000 | 0.00000 |
| Inj_Speed*Inj_Press*Viscosity                 | 0.00000 | 0.00000 |
| Inj_Speed*Melt_Temp*Viscosity                 | 0.00000 | 0.00000 |
| Inj_Speed*Inj_Press*Screw_Speed               | 0.00000 | 0.00000 |
| Inj_Speed*Melt_Temp*Screw_Speed               | 0.00000 | 0.00000 |
| Inj_Speed*Viscosity*Screw_Speed               | 0.00000 | 0.00000 |
| Inj_Press*Melt_Temp*Viscosity                 | 0.00000 | 0.00000 |
| Inj_Press*Melt_Temp*Screw_Speed               | 0.00000 | 0.00000 |
| Inj_Press*Viscosity*Screw_Speed               | 0.00000 | 0.00000 |
| Melt_Temp*Viscosity*Screw_Speed               | 0.00000 | 0.00000 |
| Flow_Rate*Inj_Speed*Inj_Press*<br>Melt_Temp   | 0.00000 | 0.00000 |
| Flow_Rate*Inj_Speed*Inj_Press*<br>Viscosity   | 0.00000 | 0.00000 |
| Flow_Rate*Inj_Speed*Melt_Temp*<br>Viscosity   | 0.00000 | 0.00000 |
| Flow_Rate*Inj_Press*Melt_Temp*<br>Viscosity   | 0.00000 | 0.00000 |
| Flow_Rate*Inj_Speed*Inj_Press*<br>Screw_Speed | 0.00000 | 0.00000 |
| Flow_Rate*Inj_Speed*Melt_Temp*<br>Screw_Speed | 0.00000 | 0.00000 |
| Flow_Rate*Inj_Press*Melt_Temp*<br>Screw_Speed | 0.00000 | 0.00000 |
| Flow_Rate*Inj_Speed*Viscosity*<br>Screw_Speed | 0.00000 | 0.00000 |
| Flow_Rate*Inj_Press*Viscosity*<br>Screw_Speed | 0.00000 | 0.00000 |

|                                 |         |         |
|---------------------------------|---------|---------|
| Flow_Rate*Melt_Temp*Viscosity*  | 0.00000 | 0.00000 |
| Screw_Speed                     |         |         |
| Inj_Speed*Inj_Press*Melt_Temp*  | 0.00000 | 0.00000 |
| Viscosity                       |         |         |
| Inj_Speed*Inj_Press*Melt_Temp*  | 0.00000 | 0.00000 |
| Screw_Speed                     |         |         |
| Inj_Speed*Inj_Press*Viscosity*  | 0.00000 | 0.00000 |
| Screw_Speed                     |         |         |
| Inj_Speed*Melt_Temp*Viscosity*  | 0.00000 | 0.00000 |
| Screw_Speed                     |         |         |
| Inj_Press*Melt_Temp*Viscosity*  | 0.00000 | 0.00000 |
| Screw_Speed                     |         |         |
| Flow_Rate*Inj_Speed*Inj_Press*  | 0.00000 | 0.00000 |
| Melt_Temp*Viscosity             |         |         |
| Flow_Rate*Inj_Speed*Inj_Press*  | 0.00000 | 0.00000 |
| Melt_Temp*Screw_Speed           |         |         |
| Flow_Rate*Inj_Speed*Inj_Press*  | 0.00000 | 0.00000 |
| Viscosity*Screw_Speed           |         |         |
| Flow_Rate*Inj_Speed*Melt_Temp*  | 0.00000 | 0.00000 |
| Viscosity*Screw_Speed           |         |         |
| Flow_Rate*Inj_Press*Melt_Temp*  | 0.00000 | 0.00000 |
| Viscosity*Screw_Speed           |         |         |
| Inj_Speed*Inj_Press*Melt_Temp*  | 0.00000 | 0.00000 |
| Viscosity*Screw_Speed           |         |         |
| Flow_Rate*Inj_Speed*Inj_Press*  | 0.00000 | 0.00000 |
| Melt_Temp*Viscosity*Screw_Speed |         |         |

S = \* PRESS = \*

Analysis of Variance for Blocks (coded units)

| Source                        | DF | Seq SS | Adj SS |
|-------------------------------|----|--------|--------|
| Main Effects                  | 6  | 0      | 0      |
| Flow_Rate                     | 1  | 0      | 0      |
| Inj_Speed                     | 1  | 0      | 0      |
| Inj_Press                     | 1  | 0      | 0      |
| Melt_Temp                     | 1  | 0      | 0      |
| Viscosity                     | 1  | 0      | 0      |
| Screw_Speed                   | 1  | 0      | 0      |
| 2-Way Interactions            | 15 | 0      | 0      |
| Flow_Rate*Inj_Speed           | 1  | 0      | 0      |
| Flow_Rate*Inj_Press           | 1  | 0      | 0      |
| Flow_Rate*Melt_Temp           | 1  | 0      | 0      |
| Flow_Rate*Viscosity           | 1  | 0      | 0      |
| Flow_Rate*Screw_Speed         | 1  | 0      | 0      |
| Inj_Speed*Inj_Press           | 1  | 0      | 0      |
| Inj_Speed*Melt_Temp           | 1  | 0      | 0      |
| Inj_Speed*Viscosity           | 1  | 0      | 0      |
| Inj_Speed*Screw_Speed         | 1  | 0      | 0      |
| Inj_Press*Melt_Temp           | 1  | 0      | 0      |
| Inj_Press*Viscosity           | 1  | 0      | 0      |
| Inj_Press*Screw_Speed         | 1  | 0      | 0      |
| Melt_Temp*Viscosity           | 1  | 0      | 0      |
| Melt_Temp*Screw_Speed         | 1  | 0      | 0      |
| Viscosity*Screw_Speed         | 1  | 0      | 0      |
| 3-Way Interactions            | 20 | 0      | 0      |
| Flow_Rate*Inj_Speed*Inj_Press | 1  | 0      | 0      |
| Flow_Rate*Inj_Speed*Melt_Temp | 1  | 0      | 0      |
| Flow_Rate*Inj_Press*Melt_Temp | 1  | 0      | 0      |
| Flow_Rate*Inj_Speed*Viscosity | 1  | 0      | 0      |

|                                                               |    |   |   |
|---------------------------------------------------------------|----|---|---|
| Flow_Rate*Inj_Press*Viscosity                                 | 1  | 0 | 0 |
| Flow_Rate*Melt_Temp*Viscosity                                 | 1  | 0 | 0 |
| Flow_Rate*Inj_Speed*Screw_Speed                               | 1  | 0 | 0 |
| Flow_Rate*Inj_Press*Screw_Speed                               | 1  | 0 | 0 |
| Flow_Rate*Melt_Temp*Screw_Speed                               | 1  | 0 | 0 |
| Flow_Rate*Viscosity*Screw_Speed                               | 1  | 0 | 0 |
| Inj_Speed*Inj_Press*Melt_Temp                                 | 1  | 0 | 0 |
| Inj_Speed*Inj_Press*Viscosity                                 | 1  | 0 | 0 |
| Inj_Speed*Melt_Temp*Viscosity                                 | 1  | 0 | 0 |
| Inj_Speed*Inj_Press*Screw_Speed                               | 1  | 0 | 0 |
| Inj_Speed*Melt_Temp*Screw_Speed                               | 1  | 0 | 0 |
| Inj_Speed*Viscosity*Screw_Speed                               | 1  | 0 | 0 |
| Inj_Press*Melt_Temp*Viscosity                                 | 1  | 0 | 0 |
| Inj_Press*Melt_Temp*Screw_Speed                               | 1  | 0 | 0 |
| Inj_Press*Viscosity*Screw_Speed                               | 1  | 0 | 0 |
| Melt_Temp*Viscosity*Screw_Speed                               | 1  | 0 | 0 |
| 4-Way Interactions                                            | 15 | 0 | 0 |
| Flow_Rate*Inj_Speed*Inj_Press*Melt_Temp                       | 1  | 0 | 0 |
| Flow_Rate*Inj_Speed*Inj_Press*Viscosity                       | 1  | 0 | 0 |
| Flow_Rate*Inj_Speed*Melt_Temp*Viscosity                       | 1  | 0 | 0 |
| Flow_Rate*Inj_Press*Melt_Temp*Viscosity                       | 1  | 0 | 0 |
| Flow_Rate*Inj_Speed*Inj_Press*Screw_Speed                     | 1  | 0 | 0 |
| Flow_Rate*Inj_Speed*Melt_Temp*Screw_Speed                     | 1  | 0 | 0 |
| Flow_Rate*Inj_Press*Melt_Temp*Screw_Speed                     | 1  | 0 | 0 |
| Flow_Rate*Inj_Speed*Viscosity*Screw_Speed                     | 1  | 0 | 0 |
| Flow_Rate*Inj_Press*Viscosity*Screw_Speed                     | 1  | 0 | 0 |
| Flow_Rate*Melt_Temp*Viscosity*Screw_Speed                     | 1  | 0 | 0 |
| Inj_Speed*Inj_Press*Melt_Temp*Viscosity                       | 1  | 0 | 0 |
| Inj_Speed*Inj_Press*Melt_Temp*Screw_Speed                     | 1  | 0 | 0 |
| Inj_Speed*Inj_Press*Viscosity*Screw_Speed                     | 1  | 0 | 0 |
| Inj_Speed*Melt_Temp*Viscosity*Screw_Speed                     | 1  | 0 | 0 |
| Inj_Press*Melt_Temp*Viscosity*Screw_Speed                     | 1  | 0 | 0 |
| 5-Way Interactions                                            | 6  | 0 | 0 |
| Flow_Rate*Inj_Speed*Inj_Press*Melt_Temp*Viscosity             | 1  | 0 | 0 |
| Flow_Rate*Inj_Speed*Inj_Press*Melt_Temp*Screw_Speed           | 1  | 0 | 0 |
| Flow_Rate*Inj_Speed*Inj_Press*Viscosity*Screw_Speed           | 1  | 0 | 0 |
| Flow_Rate*Inj_Speed*Melt_Temp*Viscosity*Screw_Speed           | 1  | 0 | 0 |
| Flow_Rate*Inj_Press*Melt_Temp*Viscosity*Screw_Speed           | 1  | 0 | 0 |
| Inj_Speed*Inj_Press*Melt_Temp*Viscosity*Screw_Speed           | 1  | 0 | 0 |
| 6-Way Interactions                                            | 1  | 0 | 0 |
| Flow_Rate*Inj_Speed*Inj_Press*Melt_Temp*Viscosity*Screw_Speed | 1  | 0 | 0 |
| Residual Error                                                | 0  | * | * |
| Total                                                         | 63 | 0 |   |

| Adj                   |    |   |   |
|-----------------------|----|---|---|
| Source                | MS | F | P |
| Main Effects          | 0  | * | * |
| Flow_Rate             | 0  | * | * |
| Inj_Speed             | 0  | * | * |
| Inj_Press             | 0  | * | * |
| Melt_Temp             | 0  | * | * |
| Viscosity             | 0  | * | * |
| Screw_Speed           | 0  | * | * |
| 2-Way Interactions    | 0  | * | * |
| Flow_Rate*Inj_Speed   | 0  | * | * |
| Flow_Rate*Inj_Press   | 0  | * | * |
| Flow_Rate*Melt_Temp   | 0  | * | * |
| Flow_Rate*Viscosity   | 0  | * | * |
| Flow_Rate*Screw_Speed | 0  | * | * |
| Inj_Speed*Inj_Press   | 0  | * | * |
| Inj_Speed*Melt_Temp   | 0  | * | * |
| Inj_Speed*Viscosity   | 0  | * | * |
| Inj_Speed*Screw_Speed | 0  | * | * |

|                                                               |   |   |   |
|---------------------------------------------------------------|---|---|---|
| Inj_Press*Melt_Temp                                           | 0 | * | * |
| Inj_Press*Viscosity                                           | 0 | * | * |
| Inj_Press*Screw_Speed                                         | 0 | * | * |
| Melt_Temp*Viscosity                                           | 0 | * | * |
| Melt_Temp*Screw_Speed                                         | 0 | * | * |
| Viscosity*Screw_Speed                                         | 0 | * | * |
| 3-Way Interactions                                            | 0 | * | * |
| Flow_Rate*Inj_Speed*Inj_Press                                 | 0 | * | * |
| Flow_Rate*Inj_Speed*Melt_Temp                                 | 0 | * | * |
| Flow_Rate*Inj_Press*Melt_Temp                                 | 0 | * | * |
| Flow_Rate*Inj_Speed*Viscosity                                 | 0 | * | * |
| Flow_Rate*Inj_Press*Viscosity                                 | 0 | * | * |
| Flow_Rate*Melt_Temp*Viscosity                                 | 0 | * | * |
| Flow_Rate*Inj_Speed*Screw_Speed                               | 0 | * | * |
| Flow_Rate*Inj_Press*Screw_Speed                               | 0 | * | * |
| Flow_Rate*Melt_Temp*Screw_Speed                               | 0 | * | * |
| Flow_Rate*Viscosity*Screw_Speed                               | 0 | * | * |
| Inj_Speed*Inj_Press*Melt_Temp                                 | 0 | * | * |
| Inj_Speed*Inj_Press*Viscosity                                 | 0 | * | * |
| Inj_Speed*Melt_Temp*Viscosity                                 | 0 | * | * |
| Inj_Speed*Inj_Press*Screw_Speed                               | 0 | * | * |
| Inj_Speed*Melt_Temp*Screw_Speed                               | 0 | * | * |
| Inj_Speed*Viscosity*Screw_Speed                               | 0 | * | * |
| Inj_Press*Melt_Temp*Viscosity                                 | 0 | * | * |
| Inj_Press*Melt_Temp*Screw_Speed                               | 0 | * | * |
| Inj_Press*Viscosity*Screw_Speed                               | 0 | * | * |
| Melt_Temp*Viscosity*Screw_Speed                               | 0 | * | * |
| 4-Way Interactions                                            | 0 | * | * |
| Flow_Rate*Inj_Speed*Inj_Press*Melt_Temp                       | 0 | * | * |
| Flow_Rate*Inj_Speed*Inj_Press*Viscosity                       | 0 | * | * |
| Flow_Rate*Inj_Speed*Melt_Temp*Viscosity                       | 0 | * | * |
| Flow_Rate*Inj_Press*Melt_Temp*Viscosity                       | 0 | * | * |
| Flow_Rate*Inj_Speed*Inj_Press*Screw_Speed                     | 0 | * | * |
| Flow_Rate*Inj_Speed*Melt_Temp*Screw_Speed                     | 0 | * | * |
| Flow_Rate*Inj_Press*Melt_Temp*Screw_Speed                     | 0 | * | * |
| Flow_Rate*Inj_Speed*Viscosity*Screw_Speed                     | 0 | * | * |
| Flow_Rate*Inj_Press*Viscosity*Screw_Speed                     | 0 | * | * |
| Flow_Rate*Melt_Temp*Viscosity*Screw_Speed                     | 0 | * | * |
| Inj_Speed*Inj_Press*Melt_Temp*Viscosity                       | 0 | * | * |
| Inj_Speed*Inj_Press*Melt_Temp*Screw_Speed                     | 0 | * | * |
| Inj_Speed*Inj_Press*Viscosity*Screw_Speed                     | 0 | * | * |
| Inj_Speed*Melt_Temp*Viscosity*Screw_Speed                     | 0 | * | * |
| Inj_Press*Melt_Temp*Viscosity*Screw_Speed                     | 0 | * | * |
| 5-Way Interactions                                            | 0 | * | * |
| Flow_Rate*Inj_Speed*Inj_Press*Melt_Temp*Viscosity             | 0 | * | * |
| Flow_Rate*Inj_Speed*Inj_Press*Melt_Temp*Screw_Speed           | 0 | * | * |
| Flow_Rate*Inj_Speed*Inj_Press*Viscosity*Screw_Speed           | 0 | * | * |
| Flow_Rate*Inj_Speed*Melt_Temp*Viscosity*Screw_Speed           | 0 | * | * |
| Flow_Rate*Inj_Press*Melt_Temp*Viscosity*Screw_Speed           | 0 | * | * |
| Inj_Speed*Inj_Press*Melt_Temp*Viscosity*Screw_Speed           | 0 | * | * |
| 6-Way Interactions                                            | 0 | * | * |
| Flow_Rate*Inj_Speed*Inj_Press*Melt_Temp*Viscosity*Screw_Speed | 0 | * | * |
| Residual Error                                                | * |   |   |
| Total                                                         |   |   |   |

Estimated Coefficients for Blocks using data in uncoded units

| Term      | Coef        |
|-----------|-------------|
| Constant  | 1.00000     |
| Flow_Rate | 0.000000000 |
| Inj_Speed | 0.000000000 |
| Inj_Press | 0.000000000 |



|                                 |             |
|---------------------------------|-------------|
| Melt_Temp                       | 0.000000000 |
| Viscosity                       | 0.000000000 |
| Screw_Speed                     | 0.000000000 |
| Flow_Rate*Inj_Speed             | 0.000000000 |
| Flow_Rate*Inj_Press             | 0.000000000 |
| Flow_Rate*Melt_Temp             | 0.000000000 |
| Flow_Rate*Viscosity             | 0.000000000 |
| Flow_Rate*Screw_Speed           | 0.000000000 |
| Inj_Speed*Inj_Press             | 0.000000000 |
| Inj_Speed*Melt_Temp             | 0.000000000 |
| Inj_Speed*Viscosity             | 0.000000000 |
| Inj_Speed*Screw_Speed           | 0.000000000 |
| Inj_Press*Melt_Temp             | 0.000000000 |
| Inj_Press*Viscosity             | 0.000000000 |
| Inj_Press*Screw_Speed           | 0.000000000 |
| Melt_Temp*Viscosity             | 0.000000000 |
| Melt_Temp*Screw_Speed           | 0.000000000 |
| Viscosity*Screw_Speed           | 0.000000000 |
| Flow_Rate*Inj_Speed*Inj_Press   | 0.000000000 |
| Flow_Rate*Inj_Speed*Melt_Temp   | 0.000000000 |
| Flow_Rate*Inj_Press*Melt_Temp   | 0.000000000 |
| Flow_Rate*Inj_Speed*Viscosity   | 0.000000000 |
| Flow_Rate*Inj_Press*Viscosity   | 0.000000000 |
| Flow_Rate*Melt_Temp*Viscosity   | 0.000000000 |
| Flow_Rate*Inj_Speed*Screw_Speed | 0.000000000 |
| Flow_Rate*Inj_Press*Screw_Speed | 0.000000000 |
| Flow_Rate*Melt_Temp*Screw_Speed | 0.000000000 |
| Flow_Rate*Viscosity*Screw_Speed | 0.000000000 |
| Inj_Speed*Inj_Press*Melt_Temp   | 0.000000000 |
| Inj_Speed*Inj_Press*Viscosity   | 0.000000000 |
| Inj_Speed*Melt_Temp*Viscosity   | 0.000000000 |
| Inj_Speed*Inj_Press*Screw_Speed | 0.000000000 |
| Inj_Speed*Melt_Temp*Screw_Speed | 0.000000000 |
| Inj_Speed*Viscosity*Screw_Speed | 0.000000000 |
| Inj_Press*Melt_Temp*Viscosity   | 0.000000000 |
| Inj_Press*Melt_Temp*Screw_Speed | 0.000000000 |
| Inj_Press*Viscosity*Screw_Speed | 0.000000000 |
| Melt_Temp*Viscosity*Screw_Speed | 0.000000000 |
| Flow_Rate*Inj_Speed*Inj_Press*  | 0.000000000 |
| Melt_Temp                       |             |
| Flow_Rate*Inj_Speed*Inj_Press*  | 0.000000000 |
| Viscosity                       |             |
| Flow_Rate*Inj_Speed*Melt_Temp*  | 0.000000000 |
| Viscosity                       |             |
| Flow_Rate*Inj_Press*Melt_Temp*  | 0.000000000 |
| Viscosity                       |             |
| Flow_Rate*Inj_Speed*Inj_Press*  | 0.000000000 |
| Screw_Speed                     |             |
| Flow_Rate*Inj_Speed*Melt_Temp*  | 0.000000000 |
| Screw_Speed                     |             |
| Flow_Rate*Inj_Press*Melt_Temp*  | 0.000000000 |
| Screw_Speed                     |             |
| Flow_Rate*Inj_Speed*Viscosity*  | 0.000000000 |
| Screw_Speed                     |             |
| Flow_Rate*Inj_Press*Viscosity*  | 0.000000000 |
| Screw_Speed                     |             |
| Flow_Rate*Melt_Temp*Viscosity*  | 0.000000000 |
| Screw_Speed                     |             |
| Inj_Speed*Inj_Press*Melt_Temp*  | 0.000000000 |
| Viscosity                       |             |
| Inj_Speed*Inj_Press*Melt_Temp*  | 0.000000000 |
| Screw_Speed                     |             |
| Inj_Speed*Inj_Press*Viscosity*  | 0.000000000 |

|                                 |             |
|---------------------------------|-------------|
| Screw_Speed                     |             |
| Inj_Speed*Melt_Temp*Viscosity*  | 0.000000000 |
| Screw_Speed                     |             |
| Inj_Press*Melt_Temp*Viscosity*  | 0.000000000 |
| Screw_Speed                     |             |
| Flow_Rate*Inj_Speed*Inj_Press*  | 0.000000000 |
| Melt_Temp*Viscosity             |             |
| Flow_Rate*Inj_Speed*Inj_Press*  | 0.000000000 |
| Melt_Temp*Screw_Speed           |             |
| Flow_Rate*Inj_Speed*Inj_Press*  | 0.000000000 |
| Viscosity*Screw_Speed           |             |
| Flow_Rate*Inj_Speed*Melt_Temp*  | 0.000000000 |
| Viscosity*Screw_Speed           |             |
| Flow_Rate*Inj_Press*Melt_Temp*  | 0.000000000 |
| Viscosity*Screw_Speed           |             |
| Inj_Speed*Inj_Press*Melt_Temp*  | 0.000000000 |
| Viscosity*Screw_Speed           |             |
| Flow_Rate*Inj_Speed*Inj_Press*  | 0.000000000 |
| Melt_Temp*Viscosity*Screw_Speed |             |

## Effects Pareto for Blocks

Alias Structure

I

Flow\_Rate  
Inj\_Speed  
Inj\_Press  
Melt\_Temp  
Viscosity  
Screw\_Speed  
Flow\_Rate\*Inj\_Speed  
Flow\_Rate\*Inj\_Press  
Flow\_Rate\*Melt\_Temp  
Flow\_Rate\*Viscosity  
Flow\_Rate\*Screw\_Speed  
Inj\_Speed\*Inj\_Press  
Inj\_Speed\*Melt\_Temp  
Inj\_Speed\*Viscosity  
Inj\_Speed\*Screw\_Speed  
Inj\_Press\*Melt\_Temp  
Inj\_Press\*Viscosity  
Inj\_Press\*Screw\_Speed  
Melt\_Temp\*Viscosity  
Melt\_Temp\*Screw\_Speed  
Viscosity\*Screw\_Speed  
Flow\_Rate\*Inj\_Speed\*Inj\_Press  
Flow\_Rate\*Inj\_Speed\*Melt\_Temp  
Flow\_Rate\*Inj\_Press\*Melt\_Temp  
Flow\_Rate\*Inj\_Speed\*Viscosity  
Flow\_Rate\*Inj\_Press\*Viscosity  
Flow\_Rate\*Melt\_Temp\*Viscosity  
Flow\_Rate\*Inj\_Speed\*Screw\_Speed  
Flow\_Rate\*Inj\_Press\*Screw\_Speed  
Flow\_Rate\*Melt\_Temp\*Screw\_Speed  
Flow\_Rate\*Viscosity\*Screw\_Speed  
Inj\_Speed\*Inj\_Press\*Melt\_Temp  
Inj\_Speed\*Inj\_Press\*Viscosity  
Inj\_Speed\*Melt\_Temp\*Viscosity  
Inj\_Speed\*Inj\_Press\*Screw\_Speed  
Inj\_Speed\*Melt\_Temp\*Screw\_Speed

Inj\_Speed\*Viscosity\*Screw\_Speed  
 Inj\_Press\*Melt\_Temp\*Viscosity  
 Inj\_Press\*Melt\_Temp\*Screw\_Speed  
 Inj\_Press\*Viscosity\*Screw\_Speed  
 Melt\_Temp\*Viscosity\*Screw\_Speed  
 Flow\_Rate\*Inj\_Speed\*Inj\_Press\*Melt\_Temp  
 Flow\_Rate\*Inj\_Speed\*Inj\_Press\*Viscosity  
 Flow\_Rate\*Inj\_Speed\*Melt\_Temp\*Viscosity  
 Flow\_Rate\*Inj\_Press\*Melt\_Temp\*Viscosity  
 Flow\_Rate\*Inj\_Speed\*Inj\_Press\*Screw\_Speed  
 Flow\_Rate\*Inj\_Speed\*Melt\_Temp\*Screw\_Speed  
 Flow\_Rate\*Inj\_Press\*Melt\_Temp\*Screw\_Speed  
 Flow\_Rate\*Inj\_Speed\*Viscosity\*Screw\_Speed  
 Flow\_Rate\*Inj\_Press\*Viscosity\*Screw\_Speed  
 Flow\_Rate\*Melt\_Temp\*Viscosity\*Screw\_Speed  
 Inj\_Speed\*Inj\_Press\*Melt\_Temp\*Viscosity  
 Inj\_Speed\*Inj\_Press\*Melt\_Temp\*Screw\_Speed  
 Inj\_Speed\*Inj\_Press\*Viscosity\*Screw\_Speed  
 Inj\_Speed\*Melt\_Temp\*Viscosity\*Screw\_Speed  
 Inj\_Press\*Melt\_Temp\*Viscosity\*Screw\_Speed  
 Flow\_Rate\*Inj\_Speed\*Inj\_Press\*Melt\_Temp\*Viscosity  
 Flow\_Rate\*Inj\_Speed\*Inj\_Press\*Melt\_Temp\*Screw\_Speed  
 Flow\_Rate\*Inj\_Speed\*Inj\_Press\*Viscosity\*Screw\_Speed  
 Flow\_Rate\*Inj\_Speed\*Melt\_Temp\*Viscosity\*Screw\_Speed  
 Flow\_Rate\*Inj\_Press\*Melt\_Temp\*Viscosity\*Screw\_Speed  
 Inj\_Speed\*Inj\_Press\*Melt\_Temp\*Viscosity\*Screw\_Speed  
 Flow\_Rate\*Inj\_Speed\*Inj\_Press\*Melt\_Temp\*Viscosity\*Screw\_Speed

## Factorial Fit: Bubbles versus Flow\_Rate, Inj\_Speed, ...

Estimated Effects and Coefficients for Bubbles (coded units)

| Term                          | Effect | Coef   |
|-------------------------------|--------|--------|
| Constant                      |        | 13.688 |
| Flow_Rate                     | -2.750 | -1.375 |
| Inj_Speed                     | -1.688 | -0.844 |
| Inj_Press                     | 0.562  | 0.281  |
| Melt_Temp                     | -3.313 | -1.656 |
| Viscosity                     | -0.813 | -0.406 |
| Screw_Speed                   | 0.438  | 0.219  |
| Flow_Rate*Inj_Speed           | 1.437  | 0.719  |
| Flow_Rate*Inj_Press           | -2.563 | -1.281 |
| Flow_Rate*Melt_Temp           | 1.437  | 0.719  |
| Flow_Rate*Viscosity           | 0.687  | 0.344  |
| Flow_Rate*Screw_Speed         | 0.812  | 0.406  |
| Inj_Speed*Inj_Press           | 0.250  | 0.125  |
| Inj_Speed*Melt_Temp           | 0.875  | 0.437  |
| Inj_Speed*Viscosity           | 0.875  | 0.438  |
| Inj_Speed*Screw_Speed         | 0.000  | 0.000  |
| Inj_Press*Melt_Temp           | -2.000 | -1.000 |
| Inj_Press*Viscosity           | 1.000  | 0.500  |
| Inj_Press*Screw_Speed         | -1.000 | -0.500 |
| Melt_Temp*Viscosity           | 4.500  | 2.250  |
| Melt_Temp*Screw_Speed         | 1.500  | 0.750  |
| Viscosity*Screw_Speed         | 1.000  | 0.500  |
| Flow_Rate*Inj_Speed*Inj_Press | 0.875  | 0.438  |
| Flow_Rate*Inj_Speed*Melt_Temp | -0.875 | -0.438 |
| Flow_Rate*Inj_Press*Melt_Temp | 0.000  | 0.000  |
| Flow_Rate*Inj_Speed*Viscosity | 0.375  | 0.187  |
| Flow_Rate*Inj_Press*Viscosity | -0.000 | -0.000 |

|                                                                   |        |        |
|-------------------------------------------------------------------|--------|--------|
| Flow_Rate*Melt_Temp*Viscosity                                     | 0.625  | 0.313  |
| Flow_Rate*Inj_Speed*Screw_Speed                                   | 1.125  | 0.563  |
| Flow_Rate*Inj_Press*Screw_Speed                                   | -0.375 | -0.187 |
| Flow_Rate*Melt_Temp*Screw_Speed                                   | -1.000 | -0.500 |
| Flow_Rate*Viscosity*Screw_Speed                                   | 1.500  | 0.750  |
| Inj_Speed*Inj_Press*Melt_Temp                                     | 0.688  | 0.344  |
| Inj_Speed*Inj_Press*Viscosity                                     | 0.188  | 0.094  |
| Inj_Speed*Melt_Temp*Viscosity                                     | -1.063 | -0.531 |
| Inj_Speed*Inj_Press*Screw_Speed                                   | -0.938 | -0.469 |
| Inj_Speed*Melt_Temp*Screw_Speed                                   | 0.562  | 0.281  |
| Inj_Speed*Viscosity*Screw_Speed                                   | 0.563  | 0.281  |
| Inj_Press*Melt_Temp*Viscosity                                     | -0.062 | -0.031 |
| Inj_Press*Melt_Temp*Screw_Speed                                   | 0.437  | 0.219  |
| Inj_Press*Viscosity*Screw_Speed                                   | 0.187  | 0.094  |
| Melt_Temp*Viscosity*Screw_Speed                                   | 0.312  | 0.156  |
| Flow_Rate*Inj_Speed*Inj_Press*<br>Melt_Temp                       | -0.312 | -0.156 |
| Flow_Rate*Inj_Speed*Inj_Press*<br>Viscosity                       | 1.687  | 0.844  |
| Flow_Rate*Inj_Speed*Melt_Temp*<br>Viscosity                       | 1.313  | 0.656  |
| Flow_Rate*Inj_Press*Melt_Temp*<br>Viscosity                       | -3.188 | -1.594 |
| Flow_Rate*Inj_Speed*Inj_Press*<br>Screw_Speed                     | 0.437  | 0.219  |
| Flow_Rate*Inj_Speed*Melt_Temp*<br>Screw_Speed                     | -2.438 | -1.219 |
| Flow_Rate*Inj_Press*Melt_Temp*<br>Screw_Speed                     | -1.563 | -0.781 |
| Flow_Rate*Inj_Speed*Viscosity*<br>Screw_Speed                     | -0.437 | -0.219 |
| Flow_Rate*Inj_Press*Viscosity*<br>Screw_Speed                     | -0.062 | -0.031 |
| Flow_Rate*Melt_Temp*Viscosity*<br>Screw_Speed                     | 1.688  | 0.844  |
| Inj_Speed*Inj_Press*Melt_Temp*<br>Viscosity                       | -2.875 | -1.438 |
| Inj_Speed*Inj_Press*Melt_Temp*<br>Screw_Speed                     | 1.750  | 0.875  |
| Inj_Speed*Inj_Press*Viscosity*<br>Screw_Speed                     | 1.500  | 0.750  |
| Inj_Speed*Melt_Temp*Viscosity*<br>Screw_Speed                     | 0.375  | 0.187  |
| Inj_Press*Melt_Temp*Viscosity*<br>Screw_Speed                     | -0.625 | -0.313 |
| Flow_Rate*Inj_Speed*Inj_Press*<br>Melt_Temp*Viscosity             | 1.750  | 0.875  |
| Flow_Rate*Inj_Speed*Inj_Press*<br>Melt_Temp*Screw_Speed           | 0.250  | 0.125  |
| Flow_Rate*Inj_Speed*Inj_Press*<br>Viscosity*Screw_Speed           | 1.750  | 0.875  |
| Flow_Rate*Inj_Speed*Melt_Temp*<br>Viscosity*Screw_Speed           | -1.000 | -0.500 |
| Flow_Rate*Inj_Press*Melt_Temp*<br>Viscosity*Screw_Speed           | 2.250  | 1.125  |
| Inj_Speed*Inj_Press*Melt_Temp*<br>Viscosity*Screw_Speed           | -2.563 | -1.281 |
| Flow_Rate*Inj_Speed*Inj_Press*<br>Melt_Temp*Viscosity*Screw_Speed | 0.563  | 0.281  |

S = \*      PRESS = \*

Analysis of Variance for Bubbles (coded units)

| Source                                    | DF | Seq SS |
|-------------------------------------------|----|--------|
| Main Effects                              | 6  | 360.81 |
| Flow_Rate                                 | 1  | 121.00 |
| Inj_Speed                                 | 1  | 45.56  |
| Inj_Press                                 | 1  | 5.06   |
| Melt_Temp                                 | 1  | 175.56 |
| Viscosity                                 | 1  | 10.56  |
| Screw_Speed                               | 1  | 3.06   |
| 2-Way Interactions                        | 15 | 686.81 |
| Flow_Rate*Inj_Speed                       | 1  | 33.06  |
| Flow_Rate*Inj_Press                       | 1  | 105.06 |
| Flow_Rate*Melt_Temp                       | 1  | 33.06  |
| Flow_Rate*Viscosity                       | 1  | 7.56   |
| Flow_Rate*Screw_Speed                     | 1  | 10.56  |
| Inj_Speed*Inj_Press                       | 1  | 1.00   |
| Inj_Speed*Melt_Temp                       | 1  | 12.25  |
| Inj_Speed*Viscosity                       | 1  | 12.25  |
| Inj_Speed*Screw_Speed                     | 1  | 0.00   |
| Inj_Press*Melt_Temp                       | 1  | 64.00  |
| Inj_Press*Viscosity                       | 1  | 16.00  |
| Inj_Press*Screw_Speed                     | 1  | 16.00  |
| Melt_Temp*Viscosity                       | 1  | 324.00 |
| Melt_Temp*Screw_Speed                     | 1  | 36.00  |
| Viscosity*Screw_Speed                     | 1  | 16.00  |
| 3-Way Interactions                        | 20 | 163.13 |
| Flow_Rate*Inj_Speed*Inj_Press             | 1  | 12.25  |
| Flow_Rate*Inj_Speed*Melt_Temp             | 1  | 12.25  |
| Flow_Rate*Inj_Press*Melt_Temp             | 1  | 0.00   |
| Flow_Rate*Inj_Speed*Viscosity             | 1  | 2.25   |
| Flow_Rate*Inj_Press*Viscosity             | 1  | 0.00   |
| Flow_Rate*Melt_Temp*Viscosity             | 1  | 6.25   |
| Flow_Rate*Inj_Speed*Screw_Speed           | 1  | 20.25  |
| Flow_Rate*Inj_Press*Screw_Speed           | 1  | 2.25   |
| Flow_Rate*Melt_Temp*Screw_Speed           | 1  | 16.00  |
| Flow_Rate*Viscosity*Screw_Speed           | 1  | 36.00  |
| Inj_Speed*Inj_Press*Melt_Temp             | 1  | 7.56   |
| Inj_Speed*Inj_Press*Viscosity             | 1  | 0.56   |
| Inj_Speed*Melt_Temp*Viscosity             | 1  | 18.06  |
| Inj_Speed*Inj_Press*Screw_Speed           | 1  | 14.06  |
| Inj_Speed*Melt_Temp*Screw_Speed           | 1  | 5.06   |
| Inj_Speed*Viscosity*Screw_Speed           | 1  | 5.06   |
| Inj_Press*Melt_Temp*Viscosity             | 1  | 0.06   |
| Inj_Press*Melt_Temp*Screw_Speed           | 1  | 3.06   |
| Inj_Press*Viscosity*Screw_Speed           | 1  | 0.56   |
| Melt_Temp*Viscosity*Screw_Speed           | 1  | 1.56   |
| 4-Way Interactions                        | 15 | 648.88 |
| Flow_Rate*Inj_Speed*Inj_Press*Melt_Temp   | 1  | 1.56   |
| Flow_Rate*Inj_Speed*Inj_Press*Viscosity   | 1  | 45.56  |
| Flow_Rate*Inj_Speed*Melt_Temp*Viscosity   | 1  | 27.56  |
| Flow_Rate*Inj_Press*Melt_Temp*Viscosity   | 1  | 162.56 |
| Flow_Rate*Inj_Speed*Inj_Press*Screw_Speed | 1  | 3.06   |
| Flow_Rate*Inj_Speed*Melt_Temp*Screw_Speed | 1  | 95.06  |
| Flow_Rate*Inj_Press*Melt_Temp*Screw_Speed | 1  | 39.06  |
| Flow_Rate*Inj_Speed*Viscosity*Screw_Speed | 1  | 3.06   |
| Flow_Rate*Inj_Press*Viscosity*Screw_Speed | 1  | 0.06   |
| Flow_Rate*Melt_Temp*Viscosity*Screw_Speed | 1  | 45.56  |
| Inj_Speed*Inj_Press*Melt_Temp*Viscosity   | 1  | 132.25 |
| Inj_Speed*Inj_Press*Melt_Temp*Screw_Speed | 1  | 49.00  |
| Inj_Speed*Inj_Press*Viscosity*Screw_Speed | 1  | 36.00  |
| Inj_Speed*Melt_Temp*Viscosity*Screw_Speed | 1  | 2.25   |

|                                                               |    |         |
|---------------------------------------------------------------|----|---------|
| Inj_Press*Melt_Temp*Viscosity*Screw_Speed                     | 1  | 6.25    |
| 5-Way Interactions                                            | 6  | 301.06  |
| Flow_Rate*Inj_Speed*Inj_Press*Melt_Temp*Viscosity             | 1  | 49.00   |
| Flow_Rate*Inj_Speed*Inj_Press*Melt_Temp*Screw_Speed           | 1  | 1.00    |
| Flow_Rate*Inj_Speed*Inj_Press*Viscosity*Screw_Speed           | 1  | 49.00   |
| Flow_Rate*Inj_Speed*Melt_Temp*Viscosity*Screw_Speed           | 1  | 16.00   |
| Flow_Rate*Inj_Press*Melt_Temp*Viscosity*Screw_Speed           | 1  | 81.00   |
| Inj_Speed*Inj_Press*Melt_Temp*Viscosity*Screw_Speed           | 1  | 105.06  |
| 6-Way Interactions                                            | 1  | 5.06    |
| Flow_Rate*Inj_Speed*Inj_Press*Melt_Temp*Viscosity*Screw_Speed | 1  | 5.06    |
| Residual Error                                                | 0  | *       |
| Total                                                         | 63 | 2165.75 |

|                                         |         |
|-----------------------------------------|---------|
| Source                                  | Adj SS  |
| Main Effects                            | 360.813 |
| Flow_Rate                               | 121.000 |
| Inj_Speed                               | 45.563  |
| Inj_Press                               | 5.063   |
| Melt_Temp                               | 175.563 |
| Viscosity                               | 10.562  |
| Screw_Speed                             | 3.063   |
| 2-Way Interactions                      | 686.813 |
| Flow_Rate*Inj_Speed                     | 33.063  |
| Flow_Rate*Inj_Press                     | 105.063 |
| Flow_Rate*Melt_Temp                     | 33.062  |
| Flow_Rate*Viscosity                     | 7.562   |
| Flow_Rate*Screw_Speed                   | 10.562  |
| Inj_Speed*Inj_Press                     | 1.000   |
| Inj_Speed*Melt_Temp                     | 12.250  |
| Inj_Speed*Viscosity                     | 12.250  |
| Inj_Speed*Screw_Speed                   | 0.000   |
| Inj_Press*Melt_Temp                     | 64.000  |
| Inj_Press*Viscosity                     | 16.000  |
| Inj_Press*Screw_Speed                   | 16.000  |
| Melt_Temp*Viscosity                     | 324.000 |
| Melt_Temp*Screw_Speed                   | 36.000  |
| Viscosity*Screw_Speed                   | 16.000  |
| 3-Way Interactions                      | 163.125 |
| Flow_Rate*Inj_Speed*Inj_Press           | 12.250  |
| Flow_Rate*Inj_Speed*Melt_Temp           | 12.250  |
| Flow_Rate*Inj_Press*Melt_Temp           | 0.000   |
| Flow_Rate*Inj_Speed*Viscosity           | 2.250   |
| Flow_Rate*Inj_Press*Viscosity           | 0.000   |
| Flow_Rate*Melt_Temp*Viscosity           | 6.250   |
| Flow_Rate*Inj_Speed*Screw_Speed         | 20.250  |
| Flow_Rate*Inj_Press*Screw_Speed         | 2.250   |
| Flow_Rate*Melt_Temp*Screw_Speed         | 16.000  |
| Flow_Rate*Viscosity*Screw_Speed         | 36.000  |
| Inj_Speed*Inj_Press*Melt_Temp           | 7.563   |
| Inj_Speed*Inj_Press*Viscosity           | 0.563   |
| Inj_Speed*Melt_Temp*Viscosity           | 18.063  |
| Inj_Speed*Inj_Press*Screw_Speed         | 14.063  |
| Inj_Speed*Melt_Temp*Screw_Speed         | 5.062   |
| Inj_Speed*Viscosity*Screw_Speed         | 5.063   |
| Inj_Press*Melt_Temp*Viscosity           | 0.062   |
| Inj_Press*Melt_Temp*Screw_Speed         | 3.062   |
| Inj_Press*Viscosity*Screw_Speed         | 0.562   |
| Melt_Temp*Viscosity*Screw_Speed         | 1.562   |
| 4-Way Interactions                      | 648.875 |
| Flow_Rate*Inj_Speed*Inj_Press*Melt_Temp | 1.562   |
| Flow_Rate*Inj_Speed*Inj_Press*Viscosity | 45.562  |
| Flow_Rate*Inj_Speed*Melt_Temp*Viscosity | 27.563  |
| Flow_Rate*Inj_Press*Melt_Temp*Viscosity | 162.563 |

|                                                               |         |
|---------------------------------------------------------------|---------|
| Flow_Rate*Inj_Speed*Inj_Press*Screw_Speed                     | 3.062   |
| Flow_Rate*Inj_Speed*Melt_Temp*Screw_Speed                     | 95.063  |
| Flow_Rate*Inj_Press*Melt_Temp*Screw_Speed                     | 39.063  |
| Flow_Rate*Inj_Speed*Viscosity*Screw_Speed                     | 3.062   |
| Flow_Rate*Inj_Press*Viscosity*Screw_Speed                     | 0.062   |
| Flow_Rate*Melt_Temp*Viscosity*Screw_Speed                     | 45.563  |
| Inj_Speed*Inj_Press*Melt_Temp*Viscosity                       | 132.250 |
| Inj_Speed*Inj_Press*Melt_Temp*Screw_Speed                     | 49.000  |
| Inj_Speed*Inj_Press*Viscosity*Screw_Speed                     | 36.000  |
| Inj_Speed*Melt_Temp*Viscosity*Screw_Speed                     | 2.250   |
| Inj_Press*Melt_Temp*Viscosity*Screw_Speed                     | 6.250   |
| 5-Way Interactions                                            | 301.063 |
| Flow_Rate*Inj_Speed*Inj_Press*Melt_Temp*Viscosity             | 49.000  |
| Flow_Rate*Inj_Speed*Inj_Press*Melt_Temp*Screw_Speed           | 1.000   |
| Flow_Rate*Inj_Speed*Inj_Press*Viscosity*Screw_Speed           | 49.000  |
| Flow_Rate*Inj_Speed*Melt_Temp*Viscosity*Screw_Speed           | 16.000  |
| Flow_Rate*Inj_Press*Melt_Temp*Viscosity*Screw_Speed           | 81.000  |
| Inj_Speed*Inj_Press*Melt_Temp*Viscosity*Screw_Speed           | 105.063 |
| 6-Way Interactions                                            | 5.063   |
| Flow_Rate*Inj_Speed*Inj_Press*Melt_Temp*Viscosity*Screw_Speed | 5.063   |
| Residual Error                                                | *       |
| Total                                                         |         |

| Source                          | Adj MS  | F | P |
|---------------------------------|---------|---|---|
| Main Effects                    | 60.135  | * | * |
| Flow_Rate                       | 121.000 | * | * |
| Inj_Speed                       | 45.563  | * | * |
| Inj_Press                       | 5.063   | * | * |
| Melt_Temp                       | 175.563 | * | * |
| Viscosity                       | 10.562  | * | * |
| Screw_Speed                     | 3.063   | * | * |
| 2-Way Interactions              | 45.788  | * | * |
| Flow_Rate*Inj_Speed             | 33.063  | * | * |
| Flow_Rate*Inj_Press             | 105.063 | * | * |
| Flow_Rate*Melt_Temp             | 33.062  | * | * |
| Flow_Rate*Viscosity             | 7.562   | * | * |
| Flow_Rate*Screw_Speed           | 10.562  | * | * |
| Inj_Speed*Inj_Press             | 1.000   | * | * |
| Inj_Speed*Melt_Temp             | 12.250  | * | * |
| Inj_Speed*Viscosity             | 12.250  | * | * |
| Inj_Speed*Screw_Speed           | 0.000   | * | * |
| Inj_Press*Melt_Temp             | 64.000  | * | * |
| Inj_Press*Viscosity             | 16.000  | * | * |
| Inj_Press*Screw_Speed           | 16.000  | * | * |
| Melt_Temp*Viscosity             | 324.000 | * | * |
| Melt_Temp*Screw_Speed           | 36.000  | * | * |
| Viscosity*Screw_Speed           | 16.000  | * | * |
| 3-Way Interactions              | 8.156   | * | * |
| Flow_Rate*Inj_Speed*Inj_Press   | 12.250  | * | * |
| Flow_Rate*Inj_Speed*Melt_Temp   | 12.250  | * | * |
| Flow_Rate*Inj_Press*Melt_Temp   | 0.000   | * | * |
| Flow_Rate*Inj_Speed*Viscosity   | 2.250   | * | * |
| Flow_Rate*Inj_Press*Viscosity   | 0.000   | * | * |
| Flow_Rate*Melt_Temp*Viscosity   | 6.250   | * | * |
| Flow_Rate*Inj_Speed*Screw_Speed | 20.250  | * | * |
| Flow_Rate*Inj_Press*Screw_Speed | 2.250   | * | * |
| Flow_Rate*Melt_Temp*Screw_Speed | 16.000  | * | * |
| Flow_Rate*Viscosity*Screw_Speed | 36.000  | * | * |
| Inj_Speed*Inj_Press*Melt_Temp   | 7.563   | * | * |
| Inj_Speed*Inj_Press*Viscosity   | 0.563   | * | * |
| Inj_Speed*Melt_Temp*Viscosity   | 18.063  | * | * |
| Inj_Speed*Inj_Press*Screw_Speed | 14.063  | * | * |
| Inj_Speed*Melt_Temp*Screw_Speed | 5.062   | * | * |

|                                                               |         |   |   |
|---------------------------------------------------------------|---------|---|---|
| Inj_Speed*Viscosity*Screw_Speed                               | 5.063   | * | * |
| Inj_Press*Melt_Temp*Viscosity                                 | 0.062   | * | * |
| Inj_Press*Melt_Temp*Screw_Speed                               | 3.062   | * | * |
| Inj_Press*Viscosity*Screw_Speed                               | 0.562   | * | * |
| Melt_Temp*Viscosity*Screw_Speed                               | 1.562   | * | * |
| 4-Way Interactions                                            | 43.258  | * | * |
| Flow_Rate*Inj_Speed*Inj_Press*Melt_Temp                       | 1.562   | * | * |
| Flow_Rate*Inj_Speed*Inj_Press*Viscosity                       | 45.562  | * | * |
| Flow_Rate*Inj_Speed*Melt_Temp*Viscosity                       | 27.563  | * | * |
| Flow_Rate*Inj_Press*Melt_Temp*Viscosity                       | 162.563 | * | * |
| Flow_Rate*Inj_Speed*Inj_Press*Screw_Speed                     | 3.062   | * | * |
| Flow_Rate*Inj_Speed*Melt_Temp*Screw_Speed                     | 95.063  | * | * |
| Flow_Rate*Inj_Press*Melt_Temp*Screw_Speed                     | 39.063  | * | * |
| Flow_Rate*Inj_Speed*Viscosity*Screw_Speed                     | 3.062   | * | * |
| Flow_Rate*Inj_Press*Viscosity*Screw_Speed                     | 0.062   | * | * |
| Flow_Rate*Melt_Temp*Viscosity*Screw_Speed                     | 45.563  | * | * |
| Inj_Speed*Inj_Press*Melt_Temp*Viscosity                       | 132.250 | * | * |
| Inj_Speed*Inj_Press*Melt_Temp*Screw_Speed                     | 49.000  | * | * |
| Inj_Speed*Inj_Press*Viscosity*Screw_Speed                     | 36.000  | * | * |
| Inj_Speed*Melt_Temp*Viscosity*Screw_Speed                     | 2.250   | * | * |
| Inj_Press*Melt_Temp*Viscosity*Screw_Speed                     | 6.250   | * | * |
| 5-Way Interactions                                            | 50.177  | * | * |
| Flow_Rate*Inj_Speed*Inj_Press*Melt_Temp*Viscosity             | 49.000  | * | * |
| Flow_Rate*Inj_Speed*Inj_Press*Melt_Temp*Screw_Speed           | 1.000   | * | * |
| Flow_Rate*Inj_Speed*Inj_Press*Viscosity*Screw_Speed           | 49.000  | * | * |
| Flow_Rate*Inj_Speed*Melt_Temp*Viscosity*Screw_Speed           | 16.000  | * | * |
| Flow_Rate*Inj_Press*Melt_Temp*Viscosity*Screw_Speed           | 81.000  | * | * |
| Inj_Speed*Inj_Press*Melt_Temp*Viscosity*Screw_Speed           | 105.063 | * | * |
| 6-Way Interactions                                            | 5.063   | * | * |
| Flow_Rate*Inj_Speed*Inj_Press*Melt_Temp*Viscosity*Screw_Speed | 5.063   | * | * |
| Residual Error                                                |         | * |   |
| Total                                                         |         |   |   |

Estimated Coefficients for Bubbles using data in uncoded units

| Term                          | Coef     |
|-------------------------------|----------|
| Constant                      | 970663   |
| Flow_Rate                     | -208186  |
| Inj_Speed                     | -87882.9 |
| Inj_Press                     | -6397.55 |
| Melt_Temp                     | -5357.82 |
| Viscosity                     | -609707  |
| Screw_Speed                   | -82841.6 |
| Flow_Rate*Inj_Speed           | 23931.6  |
| Flow_Rate*Inj_Press           | 879.624  |
| Flow_Rate*Melt_Temp           | 1294.51  |
| Flow_Rate*Viscosity           | 150901   |
| Flow_Rate*Screw_Speed         | 20360.6  |
| Inj_Speed*Inj_Press           | 820.337  |
| Inj_Speed*Melt_Temp           | 432.010  |
| Inj_Speed*Viscosity           | 47364.7  |
| Inj_Speed*Screw_Speed         | 6110.55  |
| Inj_Press*Melt_Temp           | 39.8121  |
| Inj_Press*Viscosity           | 4007.94  |
| Inj_Press*Screw_Speed         | 684.824  |
| Melt_Temp*Viscosity           | 3219.78  |
| Melt_Temp*Screw_Speed         | 430.804  |
| Viscosity*Screw_Speed         | 48221.8  |
| Flow_Rate*Inj_Speed*Inj_Press | -215.014 |
| Flow_Rate*Inj_Speed*Melt_Temp | -121.146 |
| Flow_Rate*Inj_Press*Melt_Temp | -7.94131 |
| Flow_Rate*Inj_Speed*Viscosity | -13355.9 |



|                                                                   |            |
|-------------------------------------------------------------------|------------|
| Flow_Rate*Inj_Press*Viscosity                                     | -770.892   |
| Flow_Rate*Melt_Temp*Viscosity                                     | -850.235   |
| Flow_Rate*Inj_Speed*Screw_Speed                                   | -1700.75   |
| Flow_Rate*Inj_Press*Screw_Speed                                   | -149.014   |
| Flow_Rate*Melt_Temp*Screw_Speed                                   | -112.653   |
| Flow_Rate*Viscosity*Screw_Speed                                   | -12774.6   |
| Inj_Speed*Inj_Press*Melt_Temp                                     | -4.09818   |
| Inj_Speed*Inj_Press*Viscosity                                     | -420.687   |
| Inj_Speed*Melt_Temp*Viscosity                                     | -230.840   |
| Inj_Speed*Inj_Press*Screw_Speed                                   | -59.7259   |
| Inj_Speed*Melt_Temp*Screw_Speed                                   | -29.6701   |
| Inj_Speed*Viscosity*Screw_Speed                                   | -3236.19   |
| Inj_Press*Melt_Temp*Viscosity                                     | -23.4804   |
| Inj_Press*Melt_Temp*Screw_Speed                                   | -3.72449   |
| Inj_Press*Viscosity*Screw_Speed                                   | -382.925   |
| Melt_Temp*Viscosity*Screw_Speed                                   | -245.068   |
| Flow_Rate*Inj_Speed*Inj_Press*<br>Melt_Temp                       | 1.11737    |
| Flow_Rate*Inj_Speed*Inj_Press*<br>Viscosity                       | 113.897    |
| Flow_Rate*Inj_Speed*Melt_Temp*<br>Viscosity                       | 66.5728    |
| Flow_Rate*Inj_Press*Melt_Temp*<br>Viscosity                       | 5.42254    |
| Flow_Rate*Inj_Speed*Inj_Press*<br>Screw_Speed                     | 16.2300    |
| Flow_Rate*Inj_Speed*Melt_Temp*<br>Screw_Speed                     | 8.45540    |
| Flow_Rate*Inj_Press*Melt_Temp*<br>Screw_Speed                     | 0.903756   |
| Flow_Rate*Inj_Speed*Viscosity*<br>Screw_Speed                     | 925.822    |
| Flow_Rate*Inj_Press*Viscosity*<br>Screw_Speed                     | 91.7840    |
| Flow_Rate*Melt_Temp*Viscosity*<br>Screw_Speed                     | 67.6056    |
| Inj_Speed*Inj_Press*Melt_Temp*<br>Viscosity                       | 2.09692    |
| Inj_Speed*Inj_Press*Melt_Temp*<br>Screw_Speed                     | 0.292815   |
| Inj_Speed*Inj_Press*Viscosity*<br>Screw_Speed                     | 30.2017    |
| Inj_Speed*Melt_Temp*Viscosity*<br>Screw_Speed                     | 15.6212    |
| Inj_Press*Melt_Temp*Viscosity*<br>Screw_Speed                     | 2.04303    |
| Flow_Rate*Inj_Speed*Inj_Press*<br>Melt_Temp*Viscosity             | -0.586854  |
| Flow_Rate*Inj_Speed*Inj_Press*<br>Melt_Temp*Screw_Speed           | -0.0819249 |
| Flow_Rate*Inj_Speed*Inj_Press*<br>Viscosity*Screw_Speed           | -8.40376   |
| Flow_Rate*Inj_Speed*Melt_Temp*<br>Viscosity*Screw_Speed           | -4.55399   |
| Flow_Rate*Inj_Press*Melt_Temp*<br>Viscosity*Screw_Speed           | -0.528169  |
| Inj_Speed*Inj_Press*Melt_Temp*<br>Viscosity*Screw_Speed           | -0.148042  |
| Flow_Rate*Inj_Speed*Inj_Press*<br>Melt_Temp*Viscosity*Screw_Speed | 0.0422535  |

## Effects Pareto for Bubbles

Alias Structure

I

Flow\_Rate

Inj\_Speed

Inj\_Press

Melt\_Temp

Viscosity

Screw\_Speed

Flow\_Rate\*Inj\_Speed

Flow\_Rate\*Inj\_Press

Flow\_Rate\*Melt\_Temp

Flow\_Rate\*Viscosity

Flow\_Rate\*Screw\_Speed

Inj\_Speed\*Inj\_Press

Inj\_Speed\*Melt\_Temp

Inj\_Speed\*Viscosity

Inj\_Speed\*Screw\_Speed

Inj\_Press\*Melt\_Temp

Inj\_Press\*Viscosity

Inj\_Press\*Screw\_Speed

Melt\_Temp\*Viscosity

Melt\_Temp\*Screw\_Speed

Viscosity\*Screw\_Speed

Flow\_Rate\*Inj\_Speed\*Inj\_Press

Flow\_Rate\*Inj\_Speed\*Melt\_Temp

Flow\_Rate\*Inj\_Press\*Melt\_Temp

Flow\_Rate\*Inj\_Speed\*Viscosity

Flow\_Rate\*Inj\_Press\*Viscosity

Flow\_Rate\*Melt\_Temp\*Viscosity

Flow\_Rate\*Inj\_Speed\*Screw\_Speed

Flow\_Rate\*Inj\_Press\*Screw\_Speed

Flow\_Rate\*Melt\_Temp\*Screw\_Speed

Flow\_Rate\*Viscosity\*Screw\_Speed

Inj\_Speed\*Inj\_Press\*Melt\_Temp

Inj\_Speed\*Inj\_Press\*Viscosity

Inj\_Speed\*Melt\_Temp\*Viscosity

Inj\_Speed\*Inj\_Press\*Screw\_Speed

Inj\_Speed\*Melt\_Temp\*Screw\_Speed

Inj\_Speed\*Viscosity\*Screw\_Speed

Inj\_Press\*Melt\_Temp\*Viscosity

Inj\_Press\*Melt\_Temp\*Screw\_Speed

Inj\_Press\*Viscosity\*Screw\_Speed

Melt\_Temp\*Viscosity\*Screw\_Speed

Flow\_Rate\*Inj\_Speed\*Inj\_Press\*Melt\_Temp

Flow\_Rate\*Inj\_Speed\*Inj\_Press\*Viscosity

Flow\_Rate\*Inj\_Speed\*Melt\_Temp\*Viscosity

Flow\_Rate\*Inj\_Press\*Melt\_Temp\*Viscosity

Flow\_Rate\*Inj\_Speed\*Inj\_Press\*Screw\_Speed

Flow\_Rate\*Inj\_Speed\*Melt\_Temp\*Screw\_Speed

Flow\_Rate\*Inj\_Press\*Melt\_Temp\*Screw\_Speed

Flow\_Rate\*Inj\_Speed\*Viscosity\*Screw\_Speed

Flow\_Rate\*Inj\_Press\*Viscosity\*Screw\_Speed

Flow\_Rate\*Melt\_Temp\*Viscosity\*Screw\_Speed

Inj\_Speed\*Inj\_Press\*Melt\_Temp\*Viscosity

Inj\_Speed\*Inj\_Press\*Melt\_Temp\*Screw\_Speed

Inj\_Speed\*Inj\_Press\*Viscosity\*Screw\_Speed

Inj\_Speed\*Melt\_Temp\*Viscosity\*Screw\_Speed

Inj\_Press\*Melt\_Temp\*Viscosity\*Screw\_Speed

Flow\_Rate\*Inj\_Speed\*Inj\_Press\*Melt\_Temp\*Viscosity

Flow\_Rate\*Inj\_Speed\*Inj\_Press\*Melt\_Temp\*Screw\_Speed

Flow\_Rate\*Inj\_Speed\*Inj\_Press\*Viscosity\*Screw\_Speed

Flow\_Rate\*Inj\_Speed\*Melt\_Temp\*Viscosity\*Screw\_Speed  
 Flow\_Rate\*Inj\_Press\*Melt\_Temp\*Viscosity\*Screw\_Speed  
 Inj\_Speed\*Inj\_Press\*Melt\_Temp\*Viscosity\*Screw\_Speed  
 Flow\_Rate\*Inj\_Speed\*Inj\_Press\*Melt\_Temp\*Viscosity\*Screw\_Speed

## Results for: Worksheet 3

### Fractional Factorial Design

|          |    |                     |       |             |     |
|----------|----|---------------------|-------|-------------|-----|
| Factors: | 6  | Base Design:        | 6, 16 | Resolution: | IV  |
| Runs:    | 16 | Replicates:         | 1     | Fraction:   | 1/4 |
| Blocks:  | 1  | Center pts (total): | 0     |             |     |

Design Generators: E = ABC, F = BCD

Alias Structure

I + ABCE + ADEF + BCDF

A + BCE + DEF + ABCDF  
 B + ACE + CDF + ABDEF  
 C + ABE + BDF + ACDEF  
 D + AEF + BCF + ABCDE  
 E + ABC + ADF + BCDEF  
 F + ADE + BCD + ABCEF  
 AB + CE + ACDF + BDEF  
 AC + BE + ABDF + CDEF  
 AD + EF + ABCF + BCDE  
 AE + BC + DF + ABCDEF  
 AF + DE + ABCD + BCEF  
 BD + CF + ABEF + ACDE  
 BF + CD + ABDE + ACEF  
 ABD + ACF + BEF + CDE  
 ABF + ACD + BDE + CEF

Alias Information for Terms in the Model.  
 Totally confounded terms were removed from the analysis.

I + Flow\_Rate\*Inj\_Speed\*Inj\_Press\*Viscosity +  
     Flow\_Rate\*Melt\_Temp\*Viscosity\*Screw\_Speed +  
     Inj\_Speed\*Inj\_Press\*Melt\_Temp\*Screw\_Speed  
 Flow\_Rate + Inj\_Speed\*Inj\_Press\*Viscosity + Melt\_Temp\*Viscosity\*Screw\_Speed +  
     Flow\_Rate\*Inj\_Speed\*Inj\_Press\*Melt\_Temp\*Screw\_Speed  
 Inj\_Speed + Flow\_Rate\*Inj\_Press\*Viscosity + Inj\_Press\*Melt\_Temp\*Screw\_Speed +  
     Flow\_Rate\*Inj\_Speed\*Melt\_Temp\*Viscosity\*Screw\_Speed  
 Inj\_Press + Flow\_Rate\*Inj\_Speed\*Viscosity + Inj\_Speed\*Melt\_Temp\*Screw\_Speed +  
     Flow\_Rate\*Inj\_Press\*Melt\_Temp\*Viscosity\*Screw\_Speed  
 Melt\_Temp + Flow\_Rate\*Viscosity\*Screw\_Speed + Inj\_Speed\*Inj\_Press\*Screw\_Speed +  
     Flow\_Rate\*Inj\_Speed\*Inj\_Press\*Melt\_Temp\*Viscosity  
 Viscosity + Flow\_Rate\*Inj\_Speed\*Inj\_Press + Flow\_Rate\*Melt\_Temp\*Screw\_Speed +  
     Inj\_Speed\*Inj\_Press\*Melt\_Temp\*Viscosity\*Screw\_Speed  
 Screw\_Speed + Flow\_Rate\*Melt\_Temp\*Viscosity + Inj\_Speed\*Inj\_Press\*Melt\_Temp +  
     Flow\_Rate\*Inj\_Speed\*Inj\_Press\*Viscosity\*Screw\_Speed  
 Flow\_Rate\*Inj\_Speed + Inj\_Press\*Viscosity +  
     Flow\_Rate\*Inj\_Press\*Melt\_Temp\*Screw\_Speed +  
     Inj\_Speed\*Melt\_Temp\*Viscosity\*Screw\_Speed  
 Flow\_Rate\*Inj\_Press + Inj\_Speed\*Viscosity +  
     Flow\_Rate\*Inj\_Speed\*Melt\_Temp\*Screw\_Speed +

```

      Inj_Press*Melt_Temp*Viscosity*Screw_Speed
Flow_Rate*Melt_Temp + Viscosity*Screw_Speed +
      Flow_Rate*Inj_Speed*Inj_Press*Screw_Speed +
      Inj_Speed*Inj_Press*Melt_Temp*Viscosity
Flow_Rate*Viscosity + Inj_Speed*Inj_Press + Melt_Temp*Screw_Speed +
      Flow_Rate*Inj_Speed*Inj_Press*Melt_Temp*Viscosity*Screw_Speed
Flow_Rate*Screw_Speed + Melt_Temp*Viscosity +
      Flow_Rate*Inj_Speed*Inj_Press*Melt_Temp +
      Inj_Speed*Inj_Press*Viscosity*Screw_Speed
Inj_Speed*Melt_Temp + Inj_Press*Screw_Speed +
      Flow_Rate*Inj_Press*Melt_Temp*Viscosity +
      Flow_Rate*Inj_Speed*Viscosity*Screw_Speed
Inj_Speed*Screw_Speed + Inj_Press*Melt_Temp +
      Flow_Rate*Inj_Speed*Melt_Temp*Viscosity +
      Flow_Rate*Inj_Press*Viscosity*Screw_Speed
Flow_Rate*Inj_Speed*Melt_Temp + Flow_Rate*Inj_Press*Screw_Speed +
      Inj_Speed*Viscosity*Screw_Speed + Inj_Press*Melt_Temp*Viscosity
Flow_Rate*Inj_Press*Melt_Temp + Flow_Rate*Inj_Speed*Screw_Speed +
      Inj_Speed*Melt_Temp*Viscosity + Inj_Press*Viscosity*Screw_Speed

```

## Factorial Fit: Bubbles versus Flow\_Rate, Inj\_Speed, ...

Estimated Effects and Coefficients for Bubbles (coded units)

| Term                          | Effect | Coef   |
|-------------------------------|--------|--------|
| Constant                      |        | 13.500 |
| Flow_Rate                     | -2.000 | -1.000 |
| Inj_Speed                     | -0.750 | -0.375 |
| Inj_Press                     | -2.500 | -1.250 |
| Melt_Temp                     | -2.000 | -1.000 |
| Viscosity                     | 1.250  | 0.625  |
| Screw_Speed                   | -1.250 | -0.625 |
| Flow_Rate*Inj_Speed           | 0.250  | 0.125  |
| Flow_Rate*Inj_Press           | -1.000 | -0.500 |
| Flow_Rate*Melt_Temp           | 1.000  | 0.500  |
| Flow_Rate*Viscosity           | -2.250 | -1.125 |
| Flow_Rate*Screw_Speed         | -1.750 | -0.875 |
| Inj_Speed*Melt_Temp           | -0.250 | -0.125 |
| Inj_Speed*Screw_Speed         | -2.000 | -1.000 |
| Flow_Rate*Inj_Speed*Melt_Temp | -2.250 | -1.125 |
| Flow_Rate*Inj_Press*Melt_Temp | 4.500  | 2.250  |

S = \* PRESS = \*

Analysis of Variance for Bubbles (coded units)

| Source                | DF | Seq SS | Adj SS | Adj MS  | F | P |
|-----------------------|----|--------|--------|---------|---|---|
| Main Effects          | 6  | 71.750 | 71.750 | 11.9583 | * | * |
| Flow_Rate             | 1  | 16.000 | 16.000 | 16.0000 | * | * |
| Inj_Speed             | 1  | 2.250  | 2.250  | 2.2500  | * | * |
| Inj_Press             | 1  | 25.000 | 25.000 | 25.0000 | * | * |
| Melt_Temp             | 1  | 16.000 | 16.000 | 16.0000 | * | * |
| Viscosity             | 1  | 6.250  | 6.250  | 6.2500  | * | * |
| Screw_Speed           | 1  | 6.250  | 6.250  | 6.2500  | * | * |
| 2-Way Interactions    | 7  | 57.000 | 57.000 | 8.1429  | * | * |
| Flow_Rate*Inj_Speed   | 1  | 0.250  | 0.250  | 0.2500  | * | * |
| Flow_Rate*Inj_Press   | 1  | 4.000  | 4.000  | 4.0000  | * | * |
| Flow_Rate*Melt_Temp   | 1  | 4.000  | 4.000  | 4.0000  | * | * |
| Flow_Rate*Viscosity   | 1  | 20.250 | 20.250 | 20.2500 | * | * |
| Flow_Rate*Screw_Speed | 1  | 12.250 | 12.250 | 12.2500 | * | * |

|                               |    |         |         |         |   |   |
|-------------------------------|----|---------|---------|---------|---|---|
| Inj_Speed*Melt_Temp           | 1  | 0.250   | 0.250   | 0.2500  | * | * |
| Inj_Speed*Screw_Speed         | 1  | 16.000  | 16.000  | 16.0000 | * | * |
| 3-Way Interactions            | 2  | 101.250 | 101.250 | 50.6250 | * | * |
| Flow_Rate*Inj_Speed*Melt_Temp | 1  | 20.250  | 20.250  | 20.2500 | * | * |
| Flow_Rate*Inj_Press*Melt_Temp | 1  | 81.000  | 81.000  | 81.0000 | * | * |
| Residual Error                | 0  | *       | *       | *       |   |   |
| Total                         | 15 | 230.000 |         |         |   |   |

Estimated Coefficients for Bubbles using data in uncoded units

| Term                          | Coef      |
|-------------------------------|-----------|
| Constant                      | -3703.35  |
| Flow_Rate                     | 2327.23   |
| Inj_Speed                     | 146.679   |
| Inj_Press                     | 1.29214   |
| Melt_Temp                     | -30.1016  |
| Viscosity                     | 130.042   |
| Screw_Speed                   | 607.115   |
| Flow_Rate*Inj_Speed           | 97.6526   |
| Flow_Rate*Inj_Press           | -49.0610  |
| Flow_Rate*Melt_Temp           | -9.03756  |
| Flow_Rate*Viscosity           | -42.2535  |
| Flow_Rate*Screw_Speed         | -8.21596  |
| Inj_Speed*Melt_Temp           | 1.27042   |
| Inj_Speed*Screw_Speed         | -25.9085  |
| Flow_Rate*Inj_Speed*Melt_Temp | -0.422535 |
| Flow_Rate*Inj_Press*Melt_Temp | 0.211268  |

## Effects Pareto for Bubbles

Alias Structure

```

I + Flow_Rate*Inj_Speed*Inj_Press*Viscosity +
    Flow_Rate*Melt_Temp*Viscosity*Screw_Speed +
    Inj_Speed*Inj_Press*Melt_Temp*Screw_Speed
Flow_Rate + Inj_Speed*Inj_Press*Viscosity + Melt_Temp*Viscosity*Screw_Speed +
    Flow_Rate*Inj_Speed*Inj_Press*Melt_Temp*Screw_Speed
Inj_Speed + Flow_Rate*Inj_Press*Viscosity + Inj_Press*Melt_Temp*Screw_Speed +
    Flow_Rate*Inj_Speed*Melt_Temp*Viscosity*Screw_Speed
Inj_Press + Flow_Rate*Inj_Speed*Viscosity + Inj_Speed*Melt_Temp*Screw_Speed +
    Flow_Rate*Inj_Press*Melt_Temp*Viscosity*Screw_Speed
Melt_Temp + Flow_Rate*Viscosity*Screw_Speed + Inj_Speed*Inj_Press*Screw_Speed +
    Flow_Rate*Inj_Speed*Inj_Press*Melt_Temp*Viscosity
Viscosity + Flow_Rate*Inj_Speed*Inj_Press + Flow_Rate*Melt_Temp*Screw_Speed +
    Inj_Speed*Inj_Press*Melt_Temp*Viscosity*Screw_Speed
Screw_Speed + Flow_Rate*Melt_Temp*Viscosity + Inj_Speed*Inj_Press*Melt_Temp +
    Flow_Rate*Inj_Speed*Inj_Press*Viscosity*Screw_Speed
Flow_Rate*Inj_Speed + Inj_Press*Viscosity +
    Flow_Rate*Inj_Press*Melt_Temp*Screw_Speed +
    Inj_Speed*Melt_Temp*Viscosity*Screw_Speed
Flow_Rate*Inj_Press + Inj_Speed*Viscosity +
    Flow_Rate*Inj_Speed*Melt_Temp*Screw_Speed +
    Inj_Press*Melt_Temp*Viscosity*Screw_Speed
Flow_Rate*Melt_Temp + Viscosity*Screw_Speed +
    Flow_Rate*Inj_Speed*Inj_Press*Screw_Speed +
    Inj_Speed*Inj_Press*Melt_Temp*Viscosity
Flow_Rate*Viscosity + Inj_Speed*Inj_Press + Melt_Temp*Screw_Speed +
    Flow_Rate*Inj_Speed*Inj_Press*Melt_Temp*Viscosity*Screw_Speed
Flow_Rate*Screw_Speed + Melt_Temp*Viscosity +
    Flow_Rate*Inj_Speed*Inj_Press*Melt_Temp +

```

```

    Inj_Speed*Inj_Press*Viscosity*Screw_Speed
Inj_Speed*Melt_Temp + Inj_Press*Screw_Speed +
    Flow_Rate*Inj_Speed*Viscosity*Screw_Speed +
    Flow_Rate*Inj_Press*Melt_Temp*Viscosity
Inj_Speed*Screw_Speed + Inj_Press*Melt_Temp +
    Flow_Rate*Inj_Speed*Melt_Temp*Viscosity +
    Flow_Rate*Inj_Press*Viscosity*Screw_Speed
Flow_Rate*Inj_Speed*Melt_Temp + Flow_Rate*Inj_Press*Screw_Speed +
    Inj_Speed*Viscosity*Screw_Speed + Inj_Press*Melt_Temp*Viscosity
Flow_Rate*Inj_Speed*Screw_Speed + Flow_Rate*Inj_Press*Melt_Temp +
    Inj_Speed*Melt_Temp*Viscosity + Inj_Press*Viscosity*Screw_Speed

```

Alias Information for Terms in the Model.  
Totally confounded terms were removed from the analysis.

```

I + Flow_Rate*Inj_Speed*Inj_Press*Viscosity +
    Flow_Rate*Melt_Temp*Viscosity*Screw_Speed +
    Inj_Speed*Inj_Press*Melt_Temp*Screw_Speed
Flow_Rate + Inj_Speed*Inj_Press*Viscosity + Melt_Temp*Viscosity*Screw_Speed +
    Flow_Rate*Inj_Speed*Inj_Press*Melt_Temp*Screw_Speed
Inj_Speed + Flow_Rate*Inj_Press*Viscosity + Inj_Press*Melt_Temp*Screw_Speed +
    Flow_Rate*Inj_Speed*Melt_Temp*Viscosity*Screw_Speed
Inj_Press + Flow_Rate*Inj_Speed*Viscosity + Inj_Speed*Melt_Temp*Screw_Speed +
    Flow_Rate*Inj_Press*Melt_Temp*Viscosity*Screw_Speed
Melt_Temp + Flow_Rate*Viscosity*Screw_Speed + Inj_Speed*Inj_Press*Screw_Speed +
    Flow_Rate*Inj_Speed*Inj_Press*Melt_Temp*Viscosity
Viscosity + Flow_Rate*Inj_Speed*Inj_Press + Flow_Rate*Melt_Temp*Screw_Speed +
    Inj_Speed*Inj_Press*Melt_Temp*Viscosity*Screw_Speed
Screw_Speed + Flow_Rate*Melt_Temp*Viscosity + Inj_Speed*Inj_Press*Melt_Temp +
    Flow_Rate*Inj_Speed*Inj_Press*Viscosity*Screw_Speed
Flow_Rate*Inj_Speed + Inj_Press*Viscosity +
    Flow_Rate*Inj_Press*Melt_Temp*Screw_Speed +
    Inj_Speed*Melt_Temp*Viscosity*Screw_Speed
Flow_Rate*Inj_Press + Inj_Speed*Viscosity +
    Flow_Rate*Inj_Speed*Melt_Temp*Screw_Speed +
    Inj_Press*Melt_Temp*Viscosity*Screw_Speed
Flow_Rate*Melt_Temp + Viscosity*Screw_Speed +
    Flow_Rate*Inj_Speed*Inj_Press*Screw_Speed +
    Inj_Speed*Inj_Press*Melt_Temp*Viscosity
Flow_Rate*Viscosity + Inj_Speed*Inj_Press + Melt_Temp*Screw_Speed +
    Flow_Rate*Inj_Speed*Inj_Press*Melt_Temp*Viscosity*Screw_Speed
Flow_Rate*Screw_Speed + Melt_Temp*Viscosity +
    Flow_Rate*Inj_Speed*Inj_Press*Melt_Temp +
    Inj_Speed*Inj_Press*Viscosity*Screw_Speed
Inj_Speed*Melt_Temp + Inj_Press*Screw_Speed +
    Flow_Rate*Inj_Press*Melt_Temp*Viscosity +
    Flow_Rate*Inj_Speed*Viscosity*Screw_Speed
Inj_Speed*Screw_Speed + Inj_Press*Melt_Temp +
    Flow_Rate*Inj_Speed*Melt_Temp*Viscosity +
    Flow_Rate*Inj_Press*Viscosity*Screw_Speed
Flow_Rate*Inj_Speed*Melt_Temp + Flow_Rate*Inj_Press*Screw_Speed +
    Inj_Speed*Viscosity*Screw_Speed + Inj_Press*Melt_Temp*Viscosity
Flow_Rate*Inj_Press*Melt_Temp + Flow_Rate*Inj_Speed*Screw_Speed +
    Inj_Speed*Melt_Temp*Viscosity + Inj_Press*Viscosity*Screw_Speed

```

## Factorial Fit: Bubbles versus Flow\_Rate, Inj\_Speed, ...

Estimated Effects and Coefficients for Bubbles (coded units)

| Term     | Effect | Coef   |
|----------|--------|--------|
| Constant |        | 13.000 |

|                               |        |        |
|-------------------------------|--------|--------|
| Flow_Rate                     | -3.000 | -1.500 |
| Inj_Speed                     | -1.750 | -0.875 |
| Inj_Press                     | -1.500 | -0.750 |
| Melt_Temp                     | -1.000 | -0.500 |
| Viscosity                     | 2.250  | 1.125  |
| Screw_Speed                   | -2.250 | -1.125 |
| Flow_Rate*Inj_Speed           | -0.750 | -0.375 |
| Flow_Rate*Inj_Press           | -0.000 | -0.000 |
| Flow_Rate*Melt_Temp           | 2.000  | 1.000  |
| Flow_Rate*Viscosity           | -1.250 | -0.625 |
| Flow_Rate*Screw_Speed         | -2.750 | -1.375 |
| Inj_Speed*Melt_Temp           | 0.750  | 0.375  |
| Inj_Speed*Screw_Speed         | -3.000 | -1.500 |
| Flow_Rate*Inj_Speed*Melt_Temp | -1.250 | -0.625 |
| Flow_Rate*Inj_Press*Melt_Temp | 3.500  | 1.750  |

S = \*      PRESS = \*

#### Analysis of Variance for Bubbles (coded units)

| Source                        | DF | Seq SS  | Adj SS  | Adj MS  | F | P |
|-------------------------------|----|---------|---------|---------|---|---|
| Main Effects                  | 6  | 101.750 | 101.750 | 16.9583 | * | * |
| Flow_Rate                     | 1  | 36.000  | 36.000  | 36.0000 | * | * |
| Inj_Speed                     | 1  | 12.250  | 12.250  | 12.2500 | * | * |
| Inj_Press                     | 1  | 9.000   | 9.000   | 9.0000  | * | * |
| Melt_Temp                     | 1  | 4.000   | 4.000   | 4.0000  | * | * |
| Viscosity                     | 1  | 20.250  | 20.250  | 20.2500 | * | * |
| Screw_Speed                   | 1  | 20.250  | 20.250  | 20.2500 | * | * |
| 2-Way Interactions            | 7  | 93.000  | 93.000  | 13.2857 | * | * |
| Flow_Rate*Inj_Speed           | 1  | 2.250   | 2.250   | 2.2500  | * | * |
| Flow_Rate*Inj_Press           | 1  | 0.000   | 0.000   | 0.0000  | * | * |
| Flow_Rate*Melt_Temp           | 1  | 16.000  | 16.000  | 16.0000 | * | * |
| Flow_Rate*Viscosity           | 1  | 6.250   | 6.250   | 6.2500  | * | * |
| Flow_Rate*Screw_Speed         | 1  | 30.250  | 30.250  | 30.2500 | * | * |
| Inj_Speed*Melt_Temp           | 1  | 2.250   | 2.250   | 2.2500  | * | * |
| Inj_Speed*Screw_Speed         | 1  | 36.000  | 36.000  | 36.0000 | * | * |
| 3-Way Interactions            | 2  | 55.250  | 55.250  | 27.6250 | * | * |
| Flow_Rate*Inj_Speed*Melt_Temp | 1  | 6.250   | 6.250   | 6.2500  | * | * |
| Flow_Rate*Inj_Press*Melt_Temp | 1  | 49.000  | 49.000  | 49.0000 | * | * |
| Residual Error                | 0  | *       | *       | *       |   |   |
| Total                         | 15 | 250.000 |         |         |   |   |

#### Estimated Coefficients for Bubbles using data in uncoded units

| Term                          | Coef       |
|-------------------------------|------------|
| Constant                      | -4233.80   |
| Flow_Rate                     | 2255.87    |
| Inj_Speed                     | 184.959    |
| Inj_Press                     | -0.0750000 |
| Melt_Temp                     | -19.1646   |
| Viscosity                     | 75.3568    |
| Screw_Speed                   | 497.744    |
| Flow_Rate*Inj_Speed           | 52.5822    |
| Flow_Rate*Inj_Press           | -37.7934   |
| Flow_Rate*Melt_Temp           | -8.56808   |
| Flow_Rate*Viscosity           | -23.4742   |
| Flow_Rate*Screw_Speed         | -12.9108   |
| Inj_Speed*Melt_Temp           | 0.723568   |
| Inj_Speed*Screw_Speed         | -20.4399   |
| Flow_Rate*Inj_Speed*Melt_Temp | -0.234742  |

Flow\_Rate\*Inj\_Press\*Melt\_Temp 0.164319

## Effects Pareto for Bubbles

Alias Structure

```
I + Flow_Rate*Inj_Speed*Inj_Press*Viscosity +
    Flow_Rate*Melt_Temp*Viscosity*Screw_Speed +
    Inj_Speed*Inj_Press*Melt_Temp*Screw_Speed
Flow_Rate + Inj_Speed*Inj_Press*Viscosity + Melt_Temp*Viscosity*Screw_Speed +
    Flow_Rate*Inj_Speed*Inj_Press*Melt_Temp*Screw_Speed
Inj_Speed + Flow_Rate*Inj_Press*Viscosity + Inj_Press*Melt_Temp*Screw_Speed +
    Flow_Rate*Inj_Speed*Melt_Temp*Viscosity*Screw_Speed
Inj_Press + Flow_Rate*Inj_Speed*Viscosity + Inj_Speed*Melt_Temp*Screw_Speed +
    Flow_Rate*Inj_Press*Melt_Temp*Viscosity*Screw_Speed
Melt_Temp + Flow_Rate*Viscosity*Screw_Speed + Inj_Speed*Inj_Press*Screw_Speed +
    Flow_Rate*Inj_Speed*Inj_Press*Melt_Temp*Viscosity
Viscosity + Flow_Rate*Inj_Speed*Inj_Press + Flow_Rate*Melt_Temp*Screw_Speed +
    Inj_Speed*Inj_Press*Melt_Temp*Viscosity*Screw_Speed
Screw_Speed + Flow_Rate*Melt_Temp*Viscosity + Inj_Speed*Inj_Press*Melt_Temp +
    Flow_Rate*Inj_Speed*Inj_Press*Viscosity*Screw_Speed
Flow_Rate*Inj_Speed + Inj_Press*Viscosity +
    Flow_Rate*Inj_Press*Melt_Temp*Screw_Speed +
    Inj_Speed*Melt_Temp*Viscosity*Screw_Speed
Flow_Rate*Inj_Press + Inj_Speed*Viscosity +
    Flow_Rate*Inj_Speed*Melt_Temp*Screw_Speed +
    Inj_Press*Melt_Temp*Viscosity*Screw_Speed
Flow_Rate*Melt_Temp + Viscosity*Screw_Speed +
    Flow_Rate*Inj_Speed*Inj_Press*Screw_Speed +
    Inj_Speed*Inj_Press*Melt_Temp*Viscosity
Flow_Rate*Viscosity + Inj_Speed*Inj_Press + Melt_Temp*Screw_Speed +
    Flow_Rate*Inj_Speed*Inj_Press*Melt_Temp*Viscosity*Screw_Speed
Flow_Rate*Screw_Speed + Melt_Temp*Viscosity +
    Flow_Rate*Inj_Speed*Inj_Press*Melt_Temp +
    Inj_Speed*Inj_Press*Viscosity*Screw_Speed
Inj_Speed*Melt_Temp + Inj_Press*Screw_Speed +
    Flow_Rate*Inj_Speed*Viscosity*Screw_Speed +
    Flow_Rate*Inj_Press*Melt_Temp*Viscosity
Inj_Speed*Screw_Speed + Inj_Press*Melt_Temp +
    Flow_Rate*Inj_Speed*Melt_Temp*Viscosity +
    Flow_Rate*Inj_Press*Viscosity*Screw_Speed
Flow_Rate*Inj_Speed*Melt_Temp + Flow_Rate*Inj_Press*Screw_Speed +
    Inj_Speed*Viscosity*Screw_Speed + Inj_Press*Melt_Temp*Viscosity
Flow_Rate*Inj_Speed*Screw_Speed + Flow_Rate*Inj_Press*Melt_Temp +
    Inj_Speed*Melt_Temp*Viscosity + Inj_Press*Viscosity*Screw_Speed
```

Alias Information for Terms in the Model.

Totally confounded terms were removed from the analysis.

```
I + Flow_Rate*Inj_Speed*Inj_Press*Viscosity +
    Flow_Rate*Melt_Temp*Viscosity*Screw_Speed +
    Inj_Speed*Inj_Press*Melt_Temp*Screw_Speed
Flow_Rate + Inj_Speed*Inj_Press*Viscosity + Melt_Temp*Viscosity*Screw_Speed +
    Flow_Rate*Inj_Speed*Inj_Press*Melt_Temp*Screw_Speed
Inj_Speed + Flow_Rate*Inj_Press*Viscosity + Inj_Press*Melt_Temp*Screw_Speed +
    Flow_Rate*Inj_Speed*Melt_Temp*Viscosity*Screw_Speed
Inj_Press + Flow_Rate*Inj_Speed*Viscosity + Inj_Speed*Melt_Temp*Screw_Speed +
    Flow_Rate*Inj_Press*Melt_Temp*Viscosity*Screw_Speed
Melt_Temp + Flow_Rate*Viscosity*Screw_Speed + Inj_Speed*Inj_Press*Screw_Speed +
    Flow_Rate*Inj_Speed*Inj_Press*Melt_Temp*Viscosity
```



Viscosity + Flow\_Rate\*Inj\_Speed\*Inj\_Press + Flow\_Rate\*Melt\_Temp\*Screw\_Speed +  
 Inj\_Speed\*Inj\_Press\*Melt\_Temp\*Viscosity\*Screw\_Speed  
 Screw\_Speed + Flow\_Rate\*Melt\_Temp\*Viscosity + Inj\_Speed\*Inj\_Press\*Melt\_Temp +  
 Flow\_Rate\*Inj\_Speed\*Inj\_Press\*Viscosity\*Screw\_Speed  
 Flow\_Rate\*Inj\_Speed + Inj\_Press\*Viscosity +  
 Flow\_Rate\*Inj\_Press\*Melt\_Temp\*Screw\_Speed +  
 Inj\_Speed\*Melt\_Temp\*Viscosity\*Screw\_Speed  
 Flow\_Rate\*Inj\_Press + Inj\_Speed\*Viscosity +  
 Flow\_Rate\*Inj\_Speed\*Melt\_Temp\*Screw\_Speed +  
 Inj\_Press\*Melt\_Temp\*Viscosity\*Screw\_Speed  
 Flow\_Rate\*Melt\_Temp + Viscosity\*Screw\_Speed +  
 Flow\_Rate\*Inj\_Speed\*Inj\_Press\*Screw\_Speed +  
 Inj\_Speed\*Inj\_Press\*Melt\_Temp\*Viscosity  
 Flow\_Rate\*Viscosity + Inj\_Speed\*Inj\_Press + Melt\_Temp\*Screw\_Speed +  
 Flow\_Rate\*Inj\_Speed\*Inj\_Press\*Melt\_Temp\*Viscosity\*Screw\_Speed  
 Flow\_Rate\*Screw\_Speed + Melt\_Temp\*Viscosity +  
 Flow\_Rate\*Inj\_Speed\*Inj\_Press\*Melt\_Temp +  
 Inj\_Speed\*Inj\_Press\*Viscosity\*Screw\_Speed  
 Inj\_Speed\*Melt\_Temp + Inj\_Press\*Screw\_Speed +  
 Flow\_Rate\*Inj\_Press\*Melt\_Temp\*Viscosity +  
 Flow\_Rate\*Inj\_Speed\*Viscosity\*Screw\_Speed  
 Inj\_Speed\*Screw\_Speed + Inj\_Press\*Melt\_Temp +  
 Flow\_Rate\*Inj\_Speed\*Melt\_Temp\*Viscosity +  
 Flow\_Rate\*Inj\_Press\*Viscosity\*Screw\_Speed  
 Flow\_Rate\*Inj\_Speed\*Melt\_Temp + Flow\_Rate\*Inj\_Press\*Screw\_Speed +  
 Inj\_Speed\*Viscosity\*Screw\_Speed + Inj\_Press\*Melt\_Temp\*Viscosity  
 Flow\_Rate\*Inj\_Press\*Melt\_Temp + Flow\_Rate\*Inj\_Speed\*Screw\_Speed +  
 Inj\_Speed\*Melt\_Temp\*Viscosity + Inj\_Press\*Viscosity\*Screw\_Speed

## Factorial Fit: Bubbles versus Flow\_Rate, Inj\_Speed, ...

Estimated Effects and Coefficients for Bubbles (coded units)

| Term                          | Effect | Coef   |
|-------------------------------|--------|--------|
| Constant                      |        | 14.250 |
| Flow_Rate                     | -0.500 | -0.250 |
| Inj_Speed                     | 0.750  | 0.375  |
| Inj_Press                     | -4.000 | -2.000 |
| Melt_Temp                     | -3.500 | -1.750 |
| Viscosity                     | -0.250 | -0.125 |
| Screw_Speed                   | 0.250  | 0.125  |
| Flow_Rate*Inj_Speed           | 1.750  | 0.875  |
| Flow_Rate*Inj_Press           | -2.500 | -1.250 |
| Flow_Rate*Melt_Temp           | -0.500 | -0.250 |
| Flow_Rate*Viscosity           | -3.750 | -1.875 |
| Flow_Rate*Screw_Speed         | -0.250 | -0.125 |
| Inj_Speed*Melt_Temp           | -1.750 | -0.875 |
| Inj_Speed*Screw_Speed         | -0.500 | -0.250 |
| Flow_Rate*Inj_Speed*Melt_Temp | -3.750 | -1.875 |
| Flow_Rate*Inj_Press*Melt_Temp | 6.000  | 3.000  |

S = \* PRESS = \*

Analysis of Variance for Bubbles (coded units)

| Source       | DF | Seq SS  | Adj SS  | Adj MS | F | P |
|--------------|----|---------|---------|--------|---|---|
| Main Effects | 6  | 116.750 | 116.750 | 19.458 | * | * |
| Flow_Rate    | 1  | 1.000   | 1.000   | 1.000  | * | * |
| Inj_Speed    | 1  | 2.250   | 2.250   | 2.250  | * | * |
| Inj_Press    | 1  | 64.000  | 64.000  | 64.000 | * | * |

|                               |    |         |         |         |   |   |
|-------------------------------|----|---------|---------|---------|---|---|
| Melt_Temp                     | 1  | 49.000  | 49.000  | 49.000  | * | * |
| Viscosity                     | 1  | 0.250   | 0.250   | 0.250   | * | * |
| Screw_Speed                   | 1  | 0.250   | 0.250   | 0.250   | * | * |
| 2-Way Interactions            | 7  | 108.000 | 108.000 | 15.429  | * | * |
| Flow_Rate*Inj_Speed           | 1  | 12.250  | 12.250  | 12.250  | * | * |
| Flow_Rate*Inj_Press           | 1  | 25.000  | 25.000  | 25.000  | * | * |
| Flow_Rate*Melt_Temp           | 1  | 1.000   | 1.000   | 1.000   | * | * |
| Flow_Rate*Viscosity           | 1  | 56.250  | 56.250  | 56.250  | * | * |
| Flow_Rate*Screw_Speed         | 1  | 0.250   | 0.250   | 0.250   | * | * |
| Inj_Speed*Melt_Temp           | 1  | 12.250  | 12.250  | 12.250  | * | * |
| Inj_Speed*Screw_Speed         | 1  | 1.000   | 1.000   | 1.000   | * | * |
| 3-Way Interactions            | 2  | 200.250 | 200.250 | 100.125 | * | * |
| Flow_Rate*Inj_Speed*Melt_Temp | 1  | 56.250  | 56.250  | 56.250  | * | * |
| Flow_Rate*Inj_Press*Melt_Temp | 1  | 144.000 | 144.000 | 144.000 | * | * |
| Residual Error                | 0  | *       | *       | *       |   |   |
| Total                         | 15 | 425.000 |         |         |   |   |

Estimated Coefficients for Bubbles using data in uncoded units

| Term                          | Coef      |
|-------------------------------|-----------|
| Constant                      | -2907.68  |
| Flow_Rate                     | 2434.27   |
| Inj_Speed                     | 89.2596   |
| Inj_Press                     | 3.34284   |
| Melt_Temp                     | -46.5073  |
| Viscosity                     | 212.070   |
| Screw_Speed                   | 771.171   |
| Flow_Rate*Inj_Speed           | 165.258   |
| Flow_Rate*Inj_Press           | -65.9624  |
| Flow_Rate*Melt_Temp           | -9.74178  |
| Flow_Rate*Viscosity           | -70.4225  |
| Flow_Rate*Screw_Speed         | -1.17371  |
| Inj_Speed*Melt_Temp           | 2.09070   |
| Inj_Speed*Screw_Speed         | -34.1113  |
| Flow_Rate*Inj_Speed*Melt_Temp | -0.704225 |
| Flow_Rate*Inj_Press*Melt_Temp | 0.281690  |

## Effects Pareto for Bubbles

Alias Structure

```

I + Flow_Rate*Inj_Speed*Inj_Press*Viscosity +
    Flow_Rate*Melt_Temp*Viscosity*Screw_Speed +
    Inj_Speed*Inj_Press*Melt_Temp*Screw_Speed
Flow_Rate + Inj_Speed*Inj_Press*Viscosity + Melt_Temp*Viscosity*Screw_Speed +
    Flow_Rate*Inj_Speed*Inj_Press*Melt_Temp*Screw_Speed
Inj_Speed + Flow_Rate*Inj_Press*Viscosity + Inj_Press*Melt_Temp*Screw_Speed +
    Flow_Rate*Inj_Speed*Melt_Temp*Viscosity*Screw_Speed
Inj_Press + Flow_Rate*Inj_Speed*Viscosity + Inj_Speed*Melt_Temp*Screw_Speed +
    Flow_Rate*Inj_Press*Melt_Temp*Viscosity*Screw_Speed
Melt_Temp + Flow_Rate*Viscosity*Screw_Speed + Inj_Speed*Inj_Press*Screw_Speed +
    Flow_Rate*Inj_Speed*Inj_Press*Melt_Temp*Viscosity
Viscosity + Flow_Rate*Inj_Speed*Inj_Press + Flow_Rate*Melt_Temp*Screw_Speed +
    Inj_Speed*Inj_Press*Melt_Temp*Viscosity*Screw_Speed
Screw_Speed + Flow_Rate*Melt_Temp*Viscosity + Inj_Speed*Inj_Press*Melt_Temp +
    Flow_Rate*Inj_Speed*Inj_Press*Viscosity*Screw_Speed
Flow_Rate*Inj_Speed + Inj_Press*Viscosity +
    Flow_Rate*Inj_Press*Melt_Temp*Screw_Speed +
    Inj_Speed*Melt_Temp*Viscosity*Screw_Speed
Flow_Rate*Inj_Press + Inj_Speed*Viscosity +

```

```

Flow_Rate*Inj_Speed*Melt_Temp*Screw_Speed +
Inj_Press*Melt_Temp*Viscosity*Screw_Speed
Flow_Rate*Melt_Temp + Viscosity*Screw_Speed +
Flow_Rate*Inj_Speed*Inj_Press*Screw_Speed +
Inj_Speed*Inj_Press*Melt_Temp*Viscosity
Flow_Rate*Viscosity + Inj_Speed*Inj_Press + Melt_Temp*Screw_Speed +
Flow_Rate*Inj_Speed*Inj_Press*Melt_Temp*Viscosity*Screw_Speed
Flow_Rate*Screw_Speed + Melt_Temp*Viscosity +
Flow_Rate*Inj_Speed*Inj_Press*Melt_Temp +
Inj_Speed*Inj_Press*Viscosity*Screw_Speed
Inj_Speed*Melt_Temp + Inj_Press*Screw_Speed +
Flow_Rate*Inj_Speed*Viscosity*Screw_Speed +
Flow_Rate*Inj_Press*Melt_Temp*Viscosity
Inj_Speed*Screw_Speed + Inj_Press*Melt_Temp +
Flow_Rate*Inj_Speed*Melt_Temp*Viscosity +
Flow_Rate*Inj_Press*Viscosity*Screw_Speed
Flow_Rate*Inj_Speed*Melt_Temp + Flow_Rate*Inj_Press*Screw_Speed +
Inj_Speed*Viscosity*Screw_Speed + Inj_Press*Melt_Temp*Viscosity
Flow_Rate*Inj_Speed*Screw_Speed + Flow_Rate*Inj_Press*Melt_Temp +
Inj_Speed*Melt_Temp*Viscosity + Inj_Press*Viscosity*Screw_Speed

```

Alias Information for Terms in the Model.  
Totally confounded terms were removed from the analysis.

```

I + Flow_Rate*Inj_Speed*Inj_Press*Viscosity +
Flow_Rate*Melt_Temp*Viscosity*Screw_Speed +
Inj_Speed*Inj_Press*Melt_Temp*Screw_Speed
Flow_Rate + Inj_Speed*Inj_Press*Viscosity + Melt_Temp*Viscosity*Screw_Speed +
Flow_Rate*Inj_Speed*Inj_Press*Melt_Temp*Screw_Speed
Inj_Speed + Flow_Rate*Inj_Press*Viscosity + Inj_Press*Melt_Temp*Screw_Speed +
Flow_Rate*Inj_Speed*Melt_Temp*Viscosity*Screw_Speed
Inj_Press + Flow_Rate*Inj_Speed*Viscosity + Inj_Speed*Melt_Temp*Screw_Speed +
Flow_Rate*Inj_Press*Melt_Temp*Viscosity*Screw_Speed
Melt_Temp + Flow_Rate*Viscosity*Screw_Speed + Inj_Speed*Inj_Press*Screw_Speed +
Flow_Rate*Inj_Speed*Inj_Press*Melt_Temp*Viscosity
Viscosity + Flow_Rate*Inj_Speed*Inj_Press + Flow_Rate*Melt_Temp*Screw_Speed +
Inj_Speed*Inj_Press*Melt_Temp*Viscosity*Screw_Speed
Screw_Speed + Flow_Rate*Melt_Temp*Viscosity + Inj_Speed*Inj_Press*Melt_Temp +
Flow_Rate*Inj_Speed*Inj_Press*Viscosity*Screw_Speed
Flow_Rate*Inj_Speed + Inj_Press*Viscosity +
Flow_Rate*Inj_Press*Melt_Temp*Screw_Speed +
Inj_Speed*Melt_Temp*Viscosity*Screw_Speed
Flow_Rate*Inj_Press + Inj_Speed*Viscosity +
Flow_Rate*Inj_Speed*Melt_Temp*Screw_Speed +
Inj_Press*Melt_Temp*Viscosity*Screw_Speed
Flow_Rate*Melt_Temp + Viscosity*Screw_Speed +
Flow_Rate*Inj_Speed*Inj_Press*Screw_Speed +
Inj_Speed*Inj_Press*Melt_Temp*Viscosity
Flow_Rate*Viscosity + Inj_Speed*Inj_Press + Melt_Temp*Screw_Speed +
Flow_Rate*Inj_Speed*Inj_Press*Melt_Temp*Viscosity*Screw_Speed
Flow_Rate*Screw_Speed + Melt_Temp*Viscosity +
Flow_Rate*Inj_Speed*Inj_Press*Melt_Temp +
Inj_Speed*Inj_Press*Viscosity*Screw_Speed
Inj_Speed*Melt_Temp + Inj_Press*Screw_Speed +
Flow_Rate*Inj_Press*Melt_Temp*Viscosity +
Flow_Rate*Inj_Speed*Viscosity*Screw_Speed
Inj_Speed*Screw_Speed + Inj_Press*Melt_Temp +
Flow_Rate*Inj_Speed*Melt_Temp*Viscosity +
Flow_Rate*Inj_Press*Viscosity*Screw_Speed
Flow_Rate*Inj_Speed*Melt_Temp + Flow_Rate*Inj_Press*Screw_Speed +
Inj_Speed*Viscosity*Screw_Speed + Inj_Press*Melt_Temp*Viscosity
Flow_Rate*Inj_Press*Melt_Temp + Flow_Rate*Inj_Speed*Screw_Speed +

```

Inj\_Speed\*Melt\_Temp\*Viscosity + Inj\_Press\*Viscosity\*Screw\_Speed

## Factorial Fit: Bubbles versus Flow\_Rate, Inj\_Speed, ...

Estimated Effects and Coefficients for Bubbles (coded units)

| Term                          | Effect | Coef   |
|-------------------------------|--------|--------|
| Constant                      |        | 13.875 |
| Flow_Rate                     | 0.250  | 0.125  |
| Inj_Speed                     | 1.500  | 0.750  |
| Inj_Press                     | -3.250 | -1.625 |
| Melt_Temp                     | -4.250 | -2.125 |
| Viscosity                     | 0.500  | 0.250  |
| Screw_Speed                   | -0.500 | -0.250 |
| Flow_Rate*Inj_Speed           | 1.000  | 0.500  |
| Flow_Rate*Inj_Press           | -3.250 | -1.625 |
| Flow_Rate*Melt_Temp           | 0.250  | 0.125  |
| Flow_Rate*Viscosity           | -4.500 | -2.250 |
| Flow_Rate*Screw_Speed         | 0.500  | 0.250  |
| Inj_Speed*Melt_Temp           | -1.000 | -0.500 |
| Inj_Speed*Screw_Speed         | 0.250  | 0.125  |
| Flow_Rate*Inj_Speed*Melt_Temp | -4.500 | -2.250 |
| Flow_Rate*Inj_Press*Melt_Temp | 5.250  | 2.625  |

S = \* PRESS = \*

Analysis of Variance for Bubbles (coded units)

| Source                        | DF | Seq SS  | Adj SS  | Adj MS  | F | P |
|-------------------------------|----|---------|---------|---------|---|---|
| Main Effects                  | 6  | 125.750 | 125.750 | 20.958  | * | * |
| Flow_Rate                     | 1  | 0.250   | 0.250   | 0.250   | * | * |
| Inj_Speed                     | 1  | 9.000   | 9.000   | 9.000   | * | * |
| Inj_Press                     | 1  | 42.250  | 42.250  | 42.250  | * | * |
| Melt_Temp                     | 1  | 72.250  | 72.250  | 72.250  | * | * |
| Viscosity                     | 1  | 1.000   | 1.000   | 1.000   | * | * |
| Screw_Speed                   | 1  | 1.000   | 1.000   | 1.000   | * | * |
| 2-Way Interactions            | 7  | 132.750 | 132.750 | 18.964  | * | * |
| Flow_Rate*Inj_Speed           | 1  | 4.000   | 4.000   | 4.000   | * | * |
| Flow_Rate*Inj_Press           | 1  | 42.250  | 42.250  | 42.250  | * | * |
| Flow_Rate*Melt_Temp           | 1  | 0.250   | 0.250   | 0.250   | * | * |
| Flow_Rate*Viscosity           | 1  | 81.000  | 81.000  | 81.000  | * | * |
| Flow_Rate*Screw_Speed         | 1  | 1.000   | 1.000   | 1.000   | * | * |
| Inj_Speed*Melt_Temp           | 1  | 4.000   | 4.000   | 4.000   | * | * |
| Inj_Speed*Screw_Speed         | 1  | 0.250   | 0.250   | 0.250   | * | * |
| 3-Way Interactions            | 2  | 191.250 | 191.250 | 95.625  | * | * |
| Flow_Rate*Inj_Speed*Melt_Temp | 1  | 81.000  | 81.000  | 81.000  | * | * |
| Flow_Rate*Inj_Press*Melt_Temp | 1  | 110.250 | 110.250 | 110.250 | * | * |
| Residual Error                | 0  | *       | *       | *       |   |   |
| Total                         | 15 | 449.750 |         |         |   |   |

Estimated Coefficients for Bubbles using data in uncoded units

| Term      | Coef     |
|-----------|----------|
| Constant  | 1194.43  |
| Flow_Rate | 931.455  |
| Inj_Speed | -82.3953 |
| Inj_Press | 4.44319  |
| Melt_Temp | -57.5108 |
| Viscosity | 256.085  |

|                               |           |
|-------------------------------|-----------|
| Screw_Speed                   | 661.136   |
| Flow_Rate*Inj_Speed           | 196.244   |
| Flow_Rate*Inj_Press           | -58.2160  |
| Flow_Rate*Melt_Temp           | -3.05164  |
| Flow_Rate*Viscosity           | -84.5070  |
| Flow_Rate*Screw_Speed         | 2.34742   |
| Inj_Speed*Melt_Temp           | 2.53085   |
| Inj_Speed*Screw_Speed         | -29.7099  |
| Flow_Rate*Inj_Speed*Melt_Temp | -0.845070 |
| Flow_Rate*Inj_Press*Melt_Temp | 0.246479  |

## Effects Pareto for Bubbles

Alias Structure

```

I + Flow_Rate*Inj_Speed*Inj_Press*Viscosity +
    Flow_Rate*Melt_Temp*Viscosity*Screw_Speed +
    Inj_Speed*Inj_Press*Melt_Temp*Screw_Speed
Flow_Rate + Inj_Speed*Inj_Press*Viscosity + Melt_Temp*Viscosity*Screw_Speed +
    Flow_Rate*Inj_Speed*Inj_Press*Melt_Temp*Screw_Speed
Inj_Speed + Flow_Rate*Inj_Press*Viscosity + Inj_Press*Melt_Temp*Screw_Speed +
    Flow_Rate*Inj_Speed*Melt_Temp*Viscosity*Screw_Speed
Inj_Press + Flow_Rate*Inj_Speed*Viscosity + Inj_Speed*Melt_Temp*Screw_Speed +
    Flow_Rate*Inj_Press*Melt_Temp*Viscosity*Screw_Speed
Melt_Temp + Flow_Rate*Viscosity*Screw_Speed + Inj_Speed*Inj_Press*Screw_Speed +
    Flow_Rate*Inj_Speed*Inj_Press*Melt_Temp*Viscosity
Viscosity + Flow_Rate*Inj_Speed*Inj_Press + Flow_Rate*Melt_Temp*Screw_Speed +
    Inj_Speed*Inj_Press*Melt_Temp*Viscosity*Screw_Speed
Screw_Speed + Flow_Rate*Melt_Temp*Viscosity + Inj_Speed*Inj_Press*Melt_Temp +
    Flow_Rate*Inj_Speed*Inj_Press*Viscosity*Screw_Speed
Flow_Rate*Inj_Speed + Inj_Press*Viscosity +
    Flow_Rate*Inj_Press*Melt_Temp*Screw_Speed +
    Inj_Speed*Melt_Temp*Viscosity*Screw_Speed
Flow_Rate*Inj_Press + Inj_Speed*Viscosity +
    Flow_Rate*Inj_Speed*Inj_Press*Melt_Temp*Screw_Speed +
    Inj_Press*Melt_Temp*Viscosity*Screw_Speed
Flow_Rate*Melt_Temp + Viscosity*Screw_Speed +
    Flow_Rate*Inj_Speed*Inj_Press*Screw_Speed +
    Inj_Speed*Inj_Press*Melt_Temp*Viscosity
Flow_Rate*Viscosity + Inj_Speed*Inj_Press + Melt_Temp*Screw_Speed +
    Flow_Rate*Inj_Speed*Inj_Press*Melt_Temp*Viscosity*Screw_Speed
Flow_Rate*Screw_Speed + Melt_Temp*Viscosity +
    Flow_Rate*Inj_Speed*Inj_Press*Melt_Temp +
    Inj_Speed*Inj_Press*Viscosity*Screw_Speed
Inj_Speed*Melt_Temp + Inj_Press*Screw_Speed +
    Flow_Rate*Inj_Speed*Viscosity*Screw_Speed +
    Flow_Rate*Inj_Press*Melt_Temp*Viscosity
Inj_Speed*Screw_Speed + Inj_Press*Melt_Temp +
    Flow_Rate*Inj_Speed*Melt_Temp*Viscosity +
    Flow_Rate*Inj_Press*Viscosity*Screw_Speed
Flow_Rate*Inj_Speed*Melt_Temp + Flow_Rate*Inj_Press*Screw_Speed +
    Inj_Speed*Viscosity*Screw_Speed + Inj_Press*Melt_Temp*Viscosity
Flow_Rate*Inj_Speed*Screw_Speed + Flow_Rate*Inj_Press*Melt_Temp +
    Inj_Speed*Melt_Temp*Viscosity + Inj_Press*Viscosity*Screw_Speed

```

Alias Information for Terms in the Model.

Totally confounded terms were removed from the analysis.

```

I + Flow_Rate*Inj_Speed*Inj_Press*Viscosity +
    Flow_Rate*Melt_Temp*Viscosity*Screw_Speed +

```

Inj\_Speed\*Inj\_Press\*Melt\_Temp\*Screw\_Speed  
 Flow\_Rate + Inj\_Speed\*Inj\_Press\*Viscosity + Melt\_Temp\*Viscosity\*Screw\_Speed +  
 Flow\_Rate\*Inj\_Speed\*Inj\_Press\*Melt\_Temp\*Screw\_Speed  
 Inj\_Speed + Flow\_Rate\*Inj\_Press\*Viscosity + Inj\_Press\*Melt\_Temp\*Screw\_Speed +  
 Flow\_Rate\*Inj\_Speed\*Melt\_Temp\*Viscosity\*Screw\_Speed  
 Inj\_Press + Flow\_Rate\*Inj\_Speed\*Viscosity + Inj\_Speed\*Melt\_Temp\*Screw\_Speed +  
 Flow\_Rate\*Inj\_Press\*Melt\_Temp\*Viscosity\*Screw\_Speed  
 Melt\_Temp + Flow\_Rate\*Viscosity\*Screw\_Speed + Inj\_Speed\*Inj\_Press\*Screw\_Speed +  
 Flow\_Rate\*Inj\_Speed\*Inj\_Press\*Melt\_Temp\*Viscosity  
 Viscosity + Flow\_Rate\*Inj\_Speed\*Inj\_Press + Flow\_Rate\*Melt\_Temp\*Screw\_Speed +  
 Inj\_Speed\*Inj\_Press\*Melt\_Temp\*Viscosity\*Screw\_Speed  
 Screw\_Speed + Flow\_Rate\*Melt\_Temp\*Viscosity + Inj\_Speed\*Inj\_Press\*Melt\_Temp +  
 Flow\_Rate\*Inj\_Speed\*Inj\_Press\*Viscosity\*Screw\_Speed  
 Flow\_Rate\*Inj\_Speed + Inj\_Press\*Viscosity +  
 Flow\_Rate\*Inj\_Press\*Melt\_Temp\*Screw\_Speed +  
 Inj\_Speed\*Melt\_Temp\*Viscosity\*Screw\_Speed  
 Flow\_Rate\*Inj\_Press + Inj\_Speed\*Viscosity +  
 Flow\_Rate\*Inj\_Speed\*Melt\_Temp\*Screw\_Speed +  
 Inj\_Press\*Melt\_Temp\*Viscosity\*Screw\_Speed  
 Flow\_Rate\*Melt\_Temp + Viscosity\*Screw\_Speed +  
 Flow\_Rate\*Inj\_Speed\*Inj\_Press\*Screw\_Speed +  
 Inj\_Speed\*Inj\_Press\*Melt\_Temp\*Viscosity  
 Flow\_Rate\*Viscosity + Inj\_Speed\*Inj\_Press + Melt\_Temp\*Screw\_Speed +  
 Flow\_Rate\*Inj\_Speed\*Inj\_Press\*Melt\_Temp\*Viscosity\*Screw\_Speed  
 Flow\_Rate\*Screw\_Speed + Melt\_Temp\*Viscosity +  
 Flow\_Rate\*Inj\_Speed\*Inj\_Press\*Melt\_Temp +  
 Inj\_Speed\*Inj\_Press\*Viscosity\*Screw\_Speed  
 Inj\_Speed\*Melt\_Temp + Inj\_Press\*Screw\_Speed +  
 Flow\_Rate\*Inj\_Press\*Melt\_Temp\*Viscosity +  
 Flow\_Rate\*Inj\_Speed\*Viscosity\*Screw\_Speed  
 Inj\_Speed\*Screw\_Speed + Inj\_Press\*Melt\_Temp +  
 Flow\_Rate\*Inj\_Speed\*Melt\_Temp\*Viscosity +  
 Flow\_Rate\*Inj\_Press\*Viscosity\*Screw\_Speed  
 Flow\_Rate\*Inj\_Speed\*Melt\_Temp + Flow\_Rate\*Inj\_Press\*Screw\_Speed +  
 Inj\_Speed\*Viscosity\*Screw\_Speed + Inj\_Press\*Melt\_Temp\*Viscosity  
 Flow\_Rate\*Inj\_Press\*Melt\_Temp + Flow\_Rate\*Inj\_Speed\*Screw\_Speed +  
 Inj\_Speed\*Melt\_Temp\*Viscosity + Inj\_Press\*Viscosity\*Screw\_Speed

## Factorial Fit: Bubbles versus Flow\_Rate, Inj\_Speed, ...

Estimated Effects and Coefficients for Bubbles (coded units)

| Term                          | Effect | Coef   |
|-------------------------------|--------|--------|
| Constant                      |        | 14.000 |
| Flow_Rate                     | 0.000  | 0.000  |
| Inj_Speed                     | 1.250  | 0.625  |
| Inj_Press                     | -3.500 | -1.750 |
| Melt_Temp                     | -4.000 | -2.000 |
| Viscosity                     | 0.250  | 0.125  |
| Screw_Speed                   | -0.250 | -0.125 |
| Flow_Rate*Inj_Speed           | 1.250  | 0.625  |
| Flow_Rate*Inj_Press           | -3.000 | -1.500 |
| Flow_Rate*Melt_Temp           | 0.000  | 0.000  |
| Flow_Rate*Viscosity           | -4.250 | -2.125 |
| Flow_Rate*Screw_Speed         | 0.250  | 0.125  |
| Inj_Speed*Melt_Temp           | -1.250 | -0.625 |
| Inj_Speed*Screw_Speed         | -0.000 | -0.000 |
| Flow_Rate*Inj_Speed*Melt_Temp | -4.250 | -2.125 |
| Flow_Rate*Inj_Press*Melt_Temp | 5.500  | 2.750  |

S = \* PRESS = \*

# Analysis of Variance for Bubbles (coded units)

| Source                        | DF | Seq SS  | Adj SS  | Adj MS  | F | P |
|-------------------------------|----|---------|---------|---------|---|---|
| Main Effects                  | 6  | 119.750 | 119.750 | 19.958  | * | * |
| Flow_Rate                     | 1  | 0.000   | 0.000   | 0.000   | * | * |
| Inj_Speed                     | 1  | 6.250   | 6.250   | 6.250   | * | * |
| Inj_Press                     | 1  | 49.000  | 49.000  | 49.000  | * | * |
| Melt_Temp                     | 1  | 64.000  | 64.000  | 64.000  | * | * |
| Viscosity                     | 1  | 0.250   | 0.250   | 0.250   | * | * |
| Screw_Speed                   | 1  | 0.250   | 0.250   | 0.250   | * | * |
| 2-Way Interactions            | 7  | 121.000 | 121.000 | 17.286  | * | * |
| Flow_Rate*Inj_Speed           | 1  | 6.250   | 6.250   | 6.250   | * | * |
| Flow_Rate*Inj_Press           | 1  | 36.000  | 36.000  | 36.000  | * | * |
| Flow_Rate*Melt_Temp           | 1  | 0.000   | 0.000   | 0.000   | * | * |
| Flow_Rate*Viscosity           | 1  | 72.250  | 72.250  | 72.250  | * | * |
| Flow_Rate*Screw_Speed         | 1  | 0.250   | 0.250   | 0.250   | * | * |
| Inj_Speed*Melt_Temp           | 1  | 6.250   | 6.250   | 6.250   | * | * |
| Inj_Speed*Screw_Speed         | 1  | 0.000   | 0.000   | 0.000   | * | * |
| 3-Way Interactions            | 2  | 193.250 | 193.250 | 96.625  | * | * |
| Flow_Rate*Inj_Speed*Melt_Temp | 1  | 72.250  | 72.250  | 72.250  | * | * |
| Flow_Rate*Inj_Press*Melt_Temp | 1  | 121.000 | 121.000 | 121.000 | * | * |
| Residual Error                | 0  | *       | *       | *       |   |   |
| Total                         | 15 | 434.000 |         |         |   |   |

## Estimated Coefficients for Bubbles using data in uncoded units

| Term                          | Coef      |
|-------------------------------|-----------|
| Constant                      | -172.938  |
| Flow_Rate                     | 1432.39   |
| Inj_Speed                     | -25.1770  |
| Inj_Press                     | 4.07641   |
| Melt_Temp                     | -53.8430  |
| Viscosity                     | 241.413   |
| Screw_Speed                   | 697.815   |
| Flow_Rate*Inj_Speed           | 185.915   |
| Flow_Rate*Inj_Press           | -60.7981  |
| Flow_Rate*Melt_Temp           | -5.28169  |
| Flow_Rate*Viscosity           | -79.8122  |
| Flow_Rate*Screw_Speed         | 1.17371   |
| Inj_Speed*Melt_Temp           | 2.38413   |
| Inj_Speed*Screw_Speed         | -31.1770  |
| Flow_Rate*Inj_Speed*Melt_Temp | -0.798122 |
| Flow_Rate*Inj_Press*Melt_Temp | 0.258216  |

## Effects Pareto for Bubbles

### Alias Structure

```

I + Flow_Rate*Inj_Speed*Inj_Press*Viscosity +
    Flow_Rate*Melt_Temp*Viscosity*Screw_Speed +
    Inj_Speed*Inj_Press*Melt_Temp*Screw_Speed
Flow_Rate + Inj_Speed*Inj_Press*Viscosity + Melt_Temp*Viscosity*Screw_Speed +
    Flow_Rate*Inj_Speed*Inj_Press*Melt_Temp*Screw_Speed
Inj_Speed + Flow_Rate*Inj_Press*Viscosity + Inj_Press*Melt_Temp*Screw_Speed +
    Flow_Rate*Inj_Speed*Melt_Temp*Viscosity*Screw_Speed
Inj_Press + Flow_Rate*Inj_Speed*Viscosity + Inj_Speed*Melt_Temp*Screw_Speed +
    Flow_Rate*Inj_Press*Melt_Temp*Viscosity*Screw_Speed
Melt_Temp + Flow_Rate*Viscosity*Screw_Speed + Inj_Speed*Inj_Press*Screw_Speed +

```





$\text{Inj\_Speed} \times \text{Melt\_Temp} + \text{Inj\_Press} \times \text{Screw\_Speed} +$   
 $\text{Flow\_Rate} \times \text{Inj\_Press} \times \text{Melt\_Temp} \times \text{Viscosity} +$   
 $\text{Flow\_Rate} \times \text{Inj\_Speed} \times \text{Viscosity} \times \text{Screw\_Speed}$   
 $\text{Inj\_Speed} \times \text{Screw\_Speed} + \text{Inj\_Press} \times \text{Melt\_Temp} +$   
 $\text{Flow\_Rate} \times \text{Inj\_Speed} \times \text{Melt\_Temp} \times \text{Viscosity} +$   
 $\text{Flow\_Rate} \times \text{Inj\_Press} \times \text{Viscosity} \times \text{Screw\_Speed}$   
 $\text{Flow\_Rate} \times \text{Inj\_Speed} \times \text{Melt\_Temp} + \text{Flow\_Rate} \times \text{Inj\_Press} \times \text{Screw\_Speed} +$   
 $\text{Inj\_Speed} \times \text{Viscosity} \times \text{Screw\_Speed} + \text{Inj\_Press} \times \text{Melt\_Temp} \times \text{Viscosity}$   
 $\text{Flow\_Rate} \times \text{Inj\_Press} \times \text{Melt\_Temp} + \text{Flow\_Rate} \times \text{Inj\_Speed} \times \text{Screw\_Speed} +$   
 $\text{Inj\_Speed} \times \text{Melt\_Temp} \times \text{Viscosity} + \text{Inj\_Press} \times \text{Viscosity} \times \text{Screw\_Speed}$

## Factorial Fit: Bubbles versus Flow\_Rate, Inj\_Speed, ...

Estimated Effects and Coefficients for Bubbles (coded units)

| Term                          | Effect | Coef   |
|-------------------------------|--------|--------|
| Constant                      |        | 13.938 |
| Flow_Rate                     | 0.125  | 0.063  |
| Inj_Speed                     | 1.375  | 0.687  |
| Inj_Press                     | -3.375 | -1.688 |
| Melt_Temp                     | -4.125 | -2.063 |
| Viscosity                     | 0.375  | 0.188  |
| Screw_Speed                   | -0.375 | -0.187 |
| Flow_Rate*Inj_Speed           | 1.125  | 0.563  |
| Flow_Rate*Inj_Press           | -3.125 | -1.562 |
| Flow_Rate*Melt_Temp           | 0.125  | 0.062  |
| Flow_Rate*Viscosity           | -4.375 | -2.188 |
| Flow_Rate*Screw_Speed         | 0.375  | 0.187  |
| Inj_Speed*Melt_Temp           | -1.125 | -0.563 |
| Inj_Speed*Screw_Speed         | 0.125  | 0.062  |
| Flow_Rate*Inj_Speed*Melt_Temp | -4.375 | -2.188 |
| Flow_Rate*Inj_Press*Melt_Temp | 5.375  | 2.688  |

S = \* PRESS = \*

Analysis of Variance for Bubbles (coded units)

| Source                        | DF | Seq SS  | Adj SS  | Adj MS  | F | P |
|-------------------------------|----|---------|---------|---------|---|---|
| Main Effects                  | 6  | 122.375 | 122.375 | 20.396  | * | * |
| Flow_Rate                     | 1  | 0.062   | 0.063   | 0.063   | * | * |
| Inj_Speed                     | 1  | 7.562   | 7.562   | 7.562   | * | * |
| Inj_Press                     | 1  | 45.562  | 45.562  | 45.562  | * | * |
| Melt_Temp                     | 1  | 68.062  | 68.063  | 68.063  | * | * |
| Viscosity                     | 1  | 0.562   | 0.563   | 0.563   | * | * |
| Screw_Speed                   | 1  | 0.562   | 0.562   | 0.562   | * | * |
| 2-Way Interactions            | 7  | 126.438 | 126.438 | 18.063  | * | * |
| Flow_Rate*Inj_Speed           | 1  | 5.062   | 5.062   | 5.062   | * | * |
| Flow_Rate*Inj_Press           | 1  | 39.063  | 39.062  | 39.062  | * | * |
| Flow_Rate*Melt_Temp           | 1  | 0.062   | 0.062   | 0.062   | * | * |
| Flow_Rate*Viscosity           | 1  | 76.563  | 76.563  | 76.563  | * | * |
| Flow_Rate*Screw_Speed         | 1  | 0.563   | 0.562   | 0.562   | * | * |
| Inj_Speed*Melt_Temp           | 1  | 5.063   | 5.063   | 5.063   | * | * |
| Inj_Speed*Screw_Speed         | 1  | 0.062   | 0.062   | 0.062   | * | * |
| 3-Way Interactions            | 2  | 192.125 | 192.125 | 96.063  | * | * |
| Flow_Rate*Inj_Speed*Melt_Temp | 1  | 76.563  | 76.563  | 76.563  | * | * |
| Flow_Rate*Inj_Press*Melt_Temp | 1  | 115.563 | 115.563 | 115.563 | * | * |
| Residual Error                | 0  | *       | *       | *       |   |   |
| Total                         | 15 | 440.938 |         |         |   |   |

Estimated Coefficients for Bubbles using data in uncoded units

| Term                          | Coef      |
|-------------------------------|-----------|
| Constant                      | 510.747   |
| Flow_Rate                     | 1181.92   |
| Inj_Speed                     | -53.7862  |
| Inj_Press                     | 4.25980   |
| Melt_Temp                     | -55.6769  |
| Viscosity                     | 248.749   |
| Screw_Speed                   | 679.475   |
| Flow_Rate*Inj_Speed           | 191.080   |
| Flow_Rate*Inj_Press           | -59.5070  |
| Flow_Rate*Melt_Temp           | -4.16667  |
| Flow_Rate*Viscosity           | -82.1596  |
| Flow_Rate*Screw_Speed         | 1.76056   |
| Inj_Speed*Melt_Temp           | 2.45749   |
| Inj_Speed*Screw_Speed         | -30.4434  |
| Flow_Rate*Inj_Speed*Melt_Temp | -0.821596 |
| Flow_Rate*Inj_Press*Melt_Temp | 0.252347  |

## Effects Pareto for Bubbles

Alias Structure

I + Flow\_Rate\*Inj\_Speed\*Inj\_Press\*Viscosity +  
Flow\_Rate\*Melt\_Temp\*Viscosity\*Screw\_Speed +  
Inj\_Speed\*Inj\_Press\*Melt\_Temp\*Screw\_Speed  
Flow\_Rate + Inj\_Speed\*Inj\_Press\*Viscosity + Melt\_Temp\*Viscosity\*Screw\_Speed +  
Flow\_Rate\*Inj\_Speed\*Inj\_Press\*Melt\_Temp\*Screw\_Speed  
Inj\_Speed + Flow\_Rate\*Inj\_Press\*Viscosity + Inj\_Press\*Melt\_Temp\*Screw\_Speed +  
Flow\_Rate\*Inj\_Speed\*Melt\_Temp\*Viscosity\*Screw\_Speed  
Inj\_Press + Flow\_Rate\*Inj\_Speed\*Viscosity + Inj\_Speed\*Melt\_Temp\*Screw\_Speed +  
Flow\_Rate\*Inj\_Press\*Melt\_Temp\*Viscosity\*Screw\_Speed  
Melt\_Temp + Flow\_Rate\*Viscosity\*Screw\_Speed + Inj\_Speed\*Inj\_Press\*Screw\_Speed +  
Flow\_Rate\*Inj\_Speed\*Inj\_Press\*Melt\_Temp\*Viscosity  
Viscosity + Flow\_Rate\*Inj\_Speed\*Inj\_Press + Flow\_Rate\*Melt\_Temp\*Screw\_Speed +  
Inj\_Speed\*Inj\_Press\*Melt\_Temp\*Viscosity\*Screw\_Speed  
Screw\_Speed + Flow\_Rate\*Melt\_Temp\*Viscosity + Inj\_Speed\*Inj\_Press\*Melt\_Temp +  
Flow\_Rate\*Inj\_Speed\*Inj\_Press\*Viscosity\*Screw\_Speed  
Flow\_Rate\*Inj\_Speed + Inj\_Press\*Viscosity +  
Flow\_Rate\*Inj\_Speed\*Inj\_Press\*Melt\_Temp\*Screw\_Speed +  
Inj\_Speed\*Melt\_Temp\*Viscosity\*Screw\_Speed  
Flow\_Rate\*Inj\_Press + Inj\_Speed\*Viscosity +  
Flow\_Rate\*Inj\_Speed\*Melt\_Temp\*Screw\_Speed +  
Inj\_Press\*Melt\_Temp\*Viscosity\*Screw\_Speed  
Flow\_Rate\*Melt\_Temp + Viscosity\*Screw\_Speed +  
Flow\_Rate\*Inj\_Speed\*Inj\_Press\*Screw\_Speed +  
Inj\_Speed\*Inj\_Press\*Melt\_Temp\*Viscosity  
Flow\_Rate\*Viscosity + Inj\_Speed\*Inj\_Press + Melt\_Temp\*Screw\_Speed +  
Flow\_Rate\*Inj\_Speed\*Inj\_Press\*Melt\_Temp\*Viscosity\*Screw\_Speed  
Flow\_Rate\*Screw\_Speed + Melt\_Temp\*Viscosity +  
Flow\_Rate\*Inj\_Speed\*Inj\_Press\*Melt\_Temp +  
Inj\_Speed\*Inj\_Press\*Viscosity\*Screw\_Speed  
Inj\_Speed\*Melt\_Temp + Inj\_Press\*Screw\_Speed +  
Flow\_Rate\*Inj\_Speed\*Viscosity\*Screw\_Speed +  
Flow\_Rate\*Inj\_Press\*Melt\_Temp\*Viscosity  
Inj\_Speed\*Screw\_Speed + Inj\_Press\*Melt\_Temp +  
Flow\_Rate\*Inj\_Speed\*Melt\_Temp\*Viscosity +  
Flow\_Rate\*Inj\_Press\*Viscosity\*Screw\_Speed  
Flow\_Rate\*Inj\_Speed\*Melt\_Temp + Flow\_Rate\*Inj\_Press\*Screw\_Speed +  
Inj\_Speed\*Viscosity\*Screw\_Speed + Inj\_Press\*Melt\_Temp\*Viscosity

Flow\_Rate\*Inj\_Speed\*Screw\_Speed + Flow\_Rate\*Inj\_Press\*Melt\_Temp +  
 Inj\_Speed\*Melt\_Temp\*Viscosity + Inj\_Press\*Viscosity\*Screw\_Speed

Alias Information for Terms in the Model.  
 Totally confounded terms were removed from the analysis.

I + Flow\_Rate\*Inj\_Speed\*Inj\_Press\*Viscosity +  
 Flow\_Rate\*Melt\_Temp\*Viscosity\*Screw\_Speed +  
 Inj\_Speed\*Inj\_Press\*Melt\_Temp\*Screw\_Speed  
 Flow\_Rate + Inj\_Speed\*Inj\_Press\*Viscosity + Melt\_Temp\*Viscosity\*Screw\_Speed +  
 Flow\_Rate\*Inj\_Speed\*Inj\_Press\*Melt\_Temp\*Screw\_Speed  
 Inj\_Speed + Flow\_Rate\*Inj\_Press\*Viscosity + Inj\_Press\*Melt\_Temp\*Screw\_Speed +  
 Flow\_Rate\*Inj\_Speed\*Melt\_Temp\*Viscosity\*Screw\_Speed  
 Inj\_Press + Flow\_Rate\*Inj\_Speed\*Viscosity + Inj\_Speed\*Melt\_Temp\*Screw\_Speed +  
 Flow\_Rate\*Inj\_Press\*Melt\_Temp\*Viscosity\*Screw\_Speed  
 Melt\_Temp + Flow\_Rate\*Viscosity\*Screw\_Speed + Inj\_Speed\*Inj\_Press\*Screw\_Speed +  
 Flow\_Rate\*Inj\_Speed\*Inj\_Press\*Melt\_Temp\*Viscosity  
 Viscosity + Flow\_Rate\*Inj\_Speed\*Inj\_Press + Flow\_Rate\*Melt\_Temp\*Screw\_Speed +  
 Inj\_Speed\*Inj\_Press\*Melt\_Temp\*Viscosity\*Screw\_Speed  
 Screw\_Speed + Flow\_Rate\*Melt\_Temp\*Viscosity + Inj\_Speed\*Inj\_Press\*Melt\_Temp +  
 Flow\_Rate\*Inj\_Speed\*Inj\_Press\*Viscosity\*Screw\_Speed  
 Flow\_Rate\*Inj\_Speed + Inj\_Press\*Viscosity +  
 Flow\_Rate\*Inj\_Press\*Melt\_Temp\*Screw\_Speed +  
 Inj\_Speed\*Melt\_Temp\*Viscosity\*Screw\_Speed  
 Flow\_Rate\*Inj\_Press + Inj\_Speed\*Viscosity +  
 Flow\_Rate\*Inj\_Speed\*Melt\_Temp\*Screw\_Speed +  
 Inj\_Press\*Melt\_Temp\*Viscosity\*Screw\_Speed  
 Flow\_Rate\*Melt\_Temp + Viscosity\*Screw\_Speed +  
 Flow\_Rate\*Inj\_Speed\*Inj\_Press\*Screw\_Speed +  
 Inj\_Speed\*Inj\_Press\*Melt\_Temp\*Viscosity  
 Flow\_Rate\*Viscosity + Inj\_Speed\*Inj\_Press + Melt\_Temp\*Screw\_Speed +  
 Flow\_Rate\*Inj\_Speed\*Inj\_Press\*Melt\_Temp\*Viscosity\*Screw\_Speed  
 Flow\_Rate\*Screw\_Speed + Melt\_Temp\*Viscosity +  
 Flow\_Rate\*Inj\_Speed\*Inj\_Press\*Melt\_Temp +  
 Inj\_Speed\*Inj\_Press\*Viscosity\*Screw\_Speed  
 Inj\_Speed\*Melt\_Temp + Inj\_Press\*Screw\_Speed +  
 Flow\_Rate\*Inj\_Press\*Melt\_Temp\*Viscosity +  
 Flow\_Rate\*Inj\_Speed\*Viscosity\*Screw\_Speed  
 Inj\_Speed\*Screw\_Speed + Inj\_Press\*Melt\_Temp +  
 Flow\_Rate\*Inj\_Speed\*Melt\_Temp\*Viscosity +  
 Flow\_Rate\*Inj\_Press\*Viscosity\*Screw\_Speed  
 Flow\_Rate\*Inj\_Speed\*Melt\_Temp + Flow\_Rate\*Inj\_Press\*Screw\_Speed +  
 Inj\_Speed\*Viscosity\*Screw\_Speed + Inj\_Press\*Melt\_Temp\*Viscosity  
 Flow\_Rate\*Inj\_Press\*Melt\_Temp + Flow\_Rate\*Inj\_Speed\*Screw\_Speed +  
 Inj\_Speed\*Melt\_Temp\*Viscosity + Inj\_Press\*Viscosity\*Screw\_Speed

## Factorial Fit: Bubbles versus Flow\_Rate, Inj\_Speed, ...

Estimated Effects and Coefficients for Bubbles (coded units)

| Term                | Effect | Coef   |
|---------------------|--------|--------|
| Constant            |        | 14.063 |
| Flow_Rate           | 0.375  | 0.188  |
| Inj_Speed           | 1.125  | 0.562  |
| Inj_Press           | -3.125 | -1.563 |
| Melt_Temp           | -3.875 | -1.937 |
| Viscosity           | 0.125  | 0.063  |
| Screw_Speed         | -0.625 | -0.312 |
| Flow_Rate*Inj_Speed | 0.875  | 0.437  |
| Flow_Rate*Inj_Press | -2.875 | -1.437 |
| Flow_Rate*Melt_Temp | 0.375  | 0.187  |

|                               |        |        |
|-------------------------------|--------|--------|
| Flow_Rate*Viscosity           | -4.625 | -2.313 |
| Flow_Rate*Screw_Speed         | 0.125  | 0.062  |
| Inj_Speed*Melt_Temp           | -1.375 | -0.688 |
| Inj_Speed*Screw_Speed         | 0.375  | 0.187  |
| Flow_Rate*Inj_Speed*Melt_Temp | -4.625 | -2.313 |
| Flow_Rate*Inj_Press*Melt_Temp | 5.625  | 2.813  |

S = \* PRESS = \*

#### Analysis of Variance for Bubbles (coded units)

| Source                        | DF | Seq SS  | Adj SS  | Adj MS  | F | P |
|-------------------------------|----|---------|---------|---------|---|---|
| Main Effects                  | 6  | 106.375 | 106.375 | 17.729  | * | * |
| Flow_Rate                     | 1  | 0.562   | 0.563   | 0.563   | * | * |
| Inj_Speed                     | 1  | 5.062   | 5.062   | 5.062   | * | * |
| Inj_Press                     | 1  | 39.063  | 39.063  | 39.063  | * | * |
| Melt_Temp                     | 1  | 60.062  | 60.063  | 60.063  | * | * |
| Viscosity                     | 1  | 0.062   | 0.063   | 0.063   | * | * |
| Screw_Speed                   | 1  | 1.562   | 1.562   | 1.562   | * | * |
| 2-Way Interactions            | 7  | 130.438 | 130.438 | 18.634  | * | * |
| Flow_Rate*Inj_Speed           | 1  | 3.062   | 3.062   | 3.062   | * | * |
| Flow_Rate*Inj_Press           | 1  | 33.063  | 33.062  | 33.062  | * | * |
| Flow_Rate*Melt_Temp           | 1  | 0.562   | 0.562   | 0.562   | * | * |
| Flow_Rate*Viscosity           | 1  | 85.563  | 85.563  | 85.563  | * | * |
| Flow_Rate*Screw_Speed         | 1  | 0.062   | 0.062   | 0.062   | * | * |
| Inj_Speed*Melt_Temp           | 1  | 7.563   | 7.563   | 7.563   | * | * |
| Inj_Speed*Screw_Speed         | 1  | 0.562   | 0.562   | 0.562   | * | * |
| 3-Way Interactions            | 2  | 212.125 | 212.125 | 106.063 | * | * |
| Flow_Rate*Inj_Speed*Melt_Temp | 1  | 85.563  | 85.563  | 85.563  | * | * |
| Flow_Rate*Inj_Press*Melt_Temp | 1  | 126.563 | 126.563 | 126.563 | * | * |
| Residual Error                | 0  | *       | *       | *       |   |   |
| Total                         | 15 | 448.938 |         |         |   |   |

#### Estimated Coefficients for Bubbles using data in uncoded units

| Term                          | Coef      |
|-------------------------------|-----------|
| Constant                      | 684.374   |
| Flow_Rate                     | 1185.68   |
| Inj_Speed                     | -60.6218  |
| Inj_Press                     | 3.91802   |
| Melt_Temp                     | -59.0947  |
| Viscosity                     | 262.420   |
| Screw_Speed                   | 713.654   |
| Flow_Rate*Inj_Speed           | 201.408   |
| Flow_Rate*Inj_Press           | -62.0892  |
| Flow_Rate*Melt_Temp           | -4.04930  |
| Flow_Rate*Viscosity           | -86.8545  |
| Flow_Rate*Screw_Speed         | 0.586854  |
| Inj_Speed*Melt_Temp           | 2.59420   |
| Inj_Speed*Screw_Speed         | -31.8106  |
| Flow_Rate*Inj_Speed*Melt_Temp | -0.868545 |
| Flow_Rate*Inj_Press*Melt_Temp | 0.264085  |

### Effects Pareto for Bubbles

Alias Structure

I + Flow\_Rate\*Inj\_Speed\*Inj\_Press\*Viscosity +

```

Flow_Rate*Melt_Temp*Viscosity*Screw_Speed +
Inj_Speed*Inj_Press*Melt_Temp*Screw_Speed
Flow_Rate + Inj_Speed*Inj_Press*Viscosity + Melt_Temp*Viscosity*Screw_Speed +
Flow_Rate*Inj_Speed*Inj_Press*Melt_Temp*Screw_Speed
Inj_Speed + Flow_Rate*Inj_Press*Viscosity + Inj_Press*Melt_Temp*Screw_Speed +
Flow_Rate*Inj_Speed*Melt_Temp*Viscosity*Screw_Speed
Inj_Press + Flow_Rate*Inj_Speed*Viscosity + Inj_Speed*Melt_Temp*Screw_Speed +
Flow_Rate*Inj_Press*Melt_Temp*Viscosity*Screw_Speed
Melt_Temp + Flow_Rate*Viscosity*Screw_Speed + Inj_Speed*Inj_Press*Screw_Speed +
Flow_Rate*Inj_Speed*Inj_Press*Melt_Temp*Viscosity
Viscosity + Flow_Rate*Inj_Speed*Inj_Press + Flow_Rate*Melt_Temp*Screw_Speed +
Inj_Speed*Inj_Press*Melt_Temp*Viscosity*Screw_Speed
Screw_Speed + Flow_Rate*Melt_Temp*Viscosity + Inj_Speed*Inj_Press*Melt_Temp +
Flow_Rate*Inj_Speed*Inj_Press*Viscosity*Screw_Speed
Flow_Rate*Inj_Speed + Inj_Press*Viscosity +
Flow_Rate*Inj_Press*Melt_Temp*Screw_Speed +
Inj_Speed*Melt_Temp*Viscosity*Screw_Speed
Flow_Rate*Inj_Press + Inj_Speed*Viscosity +
Flow_Rate*Inj_Speed*Melt_Temp*Screw_Speed +
Inj_Press*Melt_Temp*Viscosity*Screw_Speed
Flow_Rate*Melt_Temp + Viscosity*Screw_Speed +
Flow_Rate*Inj_Speed*Inj_Press*Screw_Speed +
Inj_Speed*Inj_Press*Melt_Temp*Viscosity
Flow_Rate*Viscosity + Inj_Speed*Inj_Press + Melt_Temp*Screw_Speed +
Flow_Rate*Inj_Speed*Inj_Press*Melt_Temp*Viscosity*Screw_Speed
Flow_Rate*Screw_Speed + Melt_Temp*Viscosity +
Flow_Rate*Inj_Speed*Inj_Press*Melt_Temp +
Inj_Speed*Inj_Press*Viscosity*Screw_Speed
Inj_Speed*Melt_Temp + Inj_Press*Screw_Speed +
Flow_Rate*Inj_Speed*Viscosity*Screw_Speed +
Flow_Rate*Inj_Press*Melt_Temp*Viscosity
Inj_Speed*Screw_Speed + Inj_Press*Melt_Temp +
Flow_Rate*Inj_Speed*Melt_Temp*Viscosity +
Flow_Rate*Inj_Press*Viscosity*Screw_Speed
Flow_Rate*Inj_Speed*Melt_Temp + Flow_Rate*Inj_Press*Screw_Speed +
Inj_Speed*Viscosity*Screw_Speed + Inj_Press*Melt_Temp*Viscosity
Flow_Rate*Inj_Speed*Screw_Speed + Flow_Rate*Inj_Press*Melt_Temp +
Inj_Speed*Melt_Temp*Viscosity + Inj_Press*Viscosity*Screw_Speed

```

Alias Information for Terms in the Model.

Totally confounded terms were removed from the analysis.

```

I + Flow_Rate*Inj_Speed*Inj_Press*Viscosity +
Flow_Rate*Melt_Temp*Viscosity*Screw_Speed +
Inj_Speed*Inj_Press*Melt_Temp*Screw_Speed
Flow_Rate + Inj_Speed*Inj_Press*Viscosity + Melt_Temp*Viscosity*Screw_Speed +
Flow_Rate*Inj_Speed*Inj_Press*Melt_Temp*Screw_Speed
Inj_Speed + Flow_Rate*Inj_Press*Viscosity + Inj_Press*Melt_Temp*Screw_Speed +
Flow_Rate*Inj_Speed*Melt_Temp*Viscosity*Screw_Speed
Inj_Press + Flow_Rate*Inj_Speed*Viscosity + Inj_Speed*Melt_Temp*Screw_Speed +
Flow_Rate*Inj_Press*Melt_Temp*Viscosity*Screw_Speed
Melt_Temp + Flow_Rate*Viscosity*Screw_Speed + Inj_Speed*Inj_Press*Screw_Speed +
Flow_Rate*Inj_Speed*Inj_Press*Melt_Temp*Viscosity
Viscosity + Flow_Rate*Inj_Speed*Inj_Press + Flow_Rate*Melt_Temp*Screw_Speed +
Inj_Speed*Inj_Press*Melt_Temp*Viscosity*Screw_Speed
Screw_Speed + Flow_Rate*Melt_Temp*Viscosity + Inj_Speed*Inj_Press*Melt_Temp +
Flow_Rate*Inj_Speed*Inj_Press*Viscosity*Screw_Speed
Flow_Rate*Inj_Speed + Inj_Press*Viscosity +
Flow_Rate*Inj_Press*Melt_Temp*Screw_Speed +
Inj_Speed*Melt_Temp*Viscosity*Screw_Speed
Flow_Rate*Inj_Press + Inj_Speed*Viscosity +
Flow_Rate*Inj_Speed*Melt_Temp*Screw_Speed +

```

```

      Inj_Press*Melt_Temp*Viscosity*Screw_Speed
Flow_Rate*Melt_Temp + Viscosity*Screw_Speed +
      Flow_Rate*Inj_Speed*Inj_Press*Screw_Speed +
      Inj_Speed*Inj_Press*Melt_Temp*Viscosity
Flow_Rate*Viscosity + Inj_Speed*Inj_Press + Melt_Temp*Screw_Speed +
      Flow_Rate*Inj_Speed*Inj_Press*Melt_Temp*Viscosity*Screw_Speed
Flow_Rate*Screw_Speed + Melt_Temp*Viscosity +
      Flow_Rate*Inj_Speed*Inj_Press*Melt_Temp +
      Inj_Speed*Inj_Press*Viscosity*Screw_Speed
Inj_Speed*Melt_Temp + Inj_Press*Screw_Speed +
      Flow_Rate*Inj_Press*Melt_Temp*Viscosity +
      Flow_Rate*Inj_Speed*Viscosity*Screw_Speed
Inj_Speed*Screw_Speed + Inj_Press*Melt_Temp +
      Flow_Rate*Inj_Speed*Melt_Temp*Viscosity +
      Flow_Rate*Inj_Press*Viscosity*Screw_Speed
Flow_Rate*Inj_Speed*Melt_Temp + Flow_Rate*Inj_Press*Screw_Speed +
      Inj_Speed*Viscosity*Screw_Speed + Inj_Press*Melt_Temp*Viscosity
Flow_Rate*Inj_Press*Melt_Temp + Flow_Rate*Inj_Speed*Screw_Speed +
      Inj_Speed*Melt_Temp*Viscosity + Inj_Press*Viscosity*Screw_Speed

```

## Factorial Fit: Bubbles versus Flow\_Rate, Inj\_Speed, ...

Estimated Effects and Coefficients for Bubbles (coded units)

| Term                          | Effect | Coef   |
|-------------------------------|--------|--------|
| Constant                      |        | 14.250 |
| Flow_Rate                     | 0.750  | 0.375  |
| Inj_Speed                     | 0.750  | 0.375  |
| Inj_Press                     | -2.750 | -1.375 |
| Melt_Temp                     | -3.500 | -1.750 |
| Viscosity                     | -0.250 | -0.125 |
| Screw_Speed                   | -1.000 | -0.500 |
| Flow_Rate*Inj_Speed           | 0.500  | 0.250  |
| Flow_Rate*Inj_Press           | -2.500 | -1.250 |
| Flow_Rate*Melt_Temp           | 0.750  | 0.375  |
| Flow_Rate*Viscosity           | -5.000 | -2.500 |
| Flow_Rate*Screw_Speed         | -0.250 | -0.125 |
| Inj_Speed*Melt_Temp           | -1.750 | -0.875 |
| Inj_Speed*Screw_Speed         | 0.750  | 0.375  |
| Flow_Rate*Inj_Speed*Melt_Temp | -5.000 | -2.500 |
| Flow_Rate*Inj_Press*Melt_Temp | 6.000  | 3.000  |

S = \* PRESS = \*

Analysis of Variance for Bubbles (coded units)

| Source                | DF | Seq SS  | Adj SS  | Adj MS  | F | P |
|-----------------------|----|---------|---------|---------|---|---|
| Main Effects          | 6  | 88.000  | 88.000  | 14.667  | * | * |
| Flow_Rate             | 1  | 2.250   | 2.250   | 2.250   | * | * |
| Inj_Speed             | 1  | 2.250   | 2.250   | 2.250   | * | * |
| Inj_Press             | 1  | 30.250  | 30.250  | 30.250  | * | * |
| Melt_Temp             | 1  | 49.000  | 49.000  | 49.000  | * | * |
| Viscosity             | 1  | 0.250   | 0.250   | 0.250   | * | * |
| Screw_Speed           | 1  | 4.000   | 4.000   | 4.000   | * | * |
| 2-Way Interactions    | 7  | 143.000 | 143.000 | 20.429  | * | * |
| Flow_Rate*Inj_Speed   | 1  | 1.000   | 1.000   | 1.000   | * | * |
| Flow_Rate*Inj_Press   | 1  | 25.000  | 25.000  | 25.000  | * | * |
| Flow_Rate*Melt_Temp   | 1  | 2.250   | 2.250   | 2.250   | * | * |
| Flow_Rate*Viscosity   | 1  | 100.000 | 100.000 | 100.000 | * | * |
| Flow_Rate*Screw_Speed | 1  | 0.250   | 0.250   | 0.250   | * | * |

|                               |    |         |         |         |   |   |
|-------------------------------|----|---------|---------|---------|---|---|
| Inj_Speed*Melt_Temp           | 1  | 12.250  | 12.250  | 12.250  | * | * |
| Inj_Speed*Screw_Speed         | 1  | 2.250   | 2.250   | 2.250   | * | * |
| 3-Way Interactions            | 2  | 244.000 | 244.000 | 122.000 | * | * |
| Flow_Rate*Inj_Speed*Melt_Temp | 1  | 100.000 | 100.000 | 100.000 | * | * |
| Flow_Rate*Inj_Press*Melt_Temp | 1  | 144.000 | 144.000 | 144.000 | * | * |
| Residual Error                | 0  | *       | *       | *       |   |   |
| Total                         | 15 | 475.000 |         |         |   |   |

Estimated Coefficients for Bubbles using data in uncoded units

| Term                          | Coef      |
|-------------------------------|-----------|
| Constant                      | 944.813   |
| Flow_Rate                     | 1191.31   |
| Inj_Speed                     | -70.8754  |
| Inj_Press                     | 3.40534   |
| Melt_Temp                     | -64.2215  |
| Viscosity                     | 282.927   |
| Screw_Speed                   | 764.921   |
| Flow_Rate*Inj_Speed           | 216.901   |
| Flow_Rate*Inj_Press           | -65.9624  |
| Flow_Rate*Melt_Temp           | -3.87324  |
| Flow_Rate*Viscosity           | -93.8967  |
| Flow_Rate*Screw_Speed         | -1.17371  |
| Inj_Speed*Melt_Temp           | 2.79927   |
| Inj_Speed*Screw_Speed         | -33.8613  |
| Flow_Rate*Inj_Speed*Melt_Temp | -0.938967 |
| Flow_Rate*Inj_Press*Melt_Temp | 0.281690  |

## Effects Pareto for Bubbles

Alias Structure

```

I + Flow_Rate*Inj_Speed*Inj_Press*Viscosity +
    Flow_Rate*Melt_Temp*Viscosity*Screw_Speed +
    Inj_Speed*Inj_Press*Melt_Temp*Screw_Speed
Flow_Rate + Inj_Speed*Inj_Press*Viscosity + Melt_Temp*Viscosity*Screw_Speed +
    Flow_Rate*Inj_Speed*Inj_Press*Melt_Temp*Screw_Speed
Inj_Speed + Flow_Rate*Inj_Press*Viscosity + Inj_Press*Melt_Temp*Screw_Speed +
    Flow_Rate*Inj_Speed*Melt_Temp*Viscosity*Screw_Speed
Inj_Press + Flow_Rate*Inj_Speed*Viscosity + Inj_Speed*Melt_Temp*Screw_Speed +
    Flow_Rate*Inj_Press*Melt_Temp*Viscosity*Screw_Speed
Melt_Temp + Flow_Rate*Viscosity*Screw_Speed + Inj_Speed*Inj_Press*Screw_Speed +
    Flow_Rate*Inj_Speed*Inj_Press*Melt_Temp*Viscosity
Viscosity + Flow_Rate*Inj_Speed*Inj_Press + Flow_Rate*Melt_Temp*Screw_Speed +
    Inj_Speed*Inj_Press*Melt_Temp*Viscosity*Screw_Speed
Screw_Speed + Flow_Rate*Melt_Temp*Viscosity + Inj_Speed*Inj_Press*Melt_Temp +
    Flow_Rate*Inj_Speed*Inj_Press*Viscosity*Screw_Speed
Flow_Rate*Inj_Speed + Inj_Press*Viscosity +
    Flow_Rate*Inj_Press*Melt_Temp*Screw_Speed +
    Inj_Speed*Melt_Temp*Viscosity*Screw_Speed
Flow_Rate*Inj_Press + Inj_Speed*Viscosity +
    Flow_Rate*Inj_Speed*Melt_Temp*Screw_Speed +
    Inj_Press*Melt_Temp*Viscosity*Screw_Speed
Flow_Rate*Melt_Temp + Viscosity*Screw_Speed +
    Flow_Rate*Inj_Speed*Inj_Press*Screw_Speed +
    Inj_Speed*Inj_Press*Melt_Temp*Viscosity
Flow_Rate*Viscosity + Inj_Speed*Inj_Press + Melt_Temp*Screw_Speed +
    Flow_Rate*Inj_Speed*Inj_Press*Melt_Temp*Viscosity*Screw_Speed
Flow_Rate*Screw_Speed + Melt_Temp*Viscosity +
    Flow_Rate*Inj_Speed*Inj_Press*Melt_Temp +

```

```

    Inj_Speed*Inj_Press*Viscosity*Screw_Speed
Inj_Speed*Melt_Temp + Inj_Press*Screw_Speed +
    Flow_Rate*Inj_Speed*Viscosity*Screw_Speed +
    Flow_Rate*Inj_Press*Melt_Temp*Viscosity
Inj_Speed*Screw_Speed + Inj_Press*Melt_Temp +
    Flow_Rate*Inj_Speed*Melt_Temp*Viscosity +
    Flow_Rate*Inj_Press*Viscosity*Screw_Speed
Flow_Rate*Inj_Speed*Melt_Temp + Flow_Rate*Inj_Press*Screw_Speed +
    Inj_Speed*Viscosity*Screw_Speed + Inj_Press*Melt_Temp*Viscosity
Flow_Rate*Inj_Speed*Screw_Speed + Flow_Rate*Inj_Press*Melt_Temp +
    Inj_Speed*Melt_Temp*Viscosity + Inj_Press*Viscosity*Screw_Speed

```

Alias Information for Terms in the Model.  
Totally confounded terms were removed from the analysis.

```

I + Flow_Rate*Inj_Speed*Inj_Press*Viscosity +
    Flow_Rate*Melt_Temp*Viscosity*Screw_Speed +
    Inj_Speed*Inj_Press*Melt_Temp*Screw_Speed
Flow_Rate + Inj_Speed*Inj_Press*Viscosity + Melt_Temp*Viscosity*Screw_Speed +
    Flow_Rate*Inj_Speed*Inj_Press*Melt_Temp*Screw_Speed
Inj_Speed + Flow_Rate*Inj_Press*Viscosity + Inj_Press*Melt_Temp*Screw_Speed +
    Flow_Rate*Inj_Speed*Melt_Temp*Viscosity*Screw_Speed
Inj_Press + Flow_Rate*Inj_Speed*Viscosity + Inj_Speed*Melt_Temp*Screw_Speed +
    Flow_Rate*Inj_Press*Melt_Temp*Viscosity*Screw_Speed
Melt_Temp + Flow_Rate*Viscosity*Screw_Speed + Inj_Speed*Inj_Press*Screw_Speed +
    Flow_Rate*Inj_Speed*Inj_Press*Melt_Temp*Viscosity
Viscosity + Flow_Rate*Inj_Speed*Inj_Press + Flow_Rate*Melt_Temp*Screw_Speed +
    Inj_Speed*Inj_Press*Melt_Temp*Viscosity*Screw_Speed
Screw_Speed + Flow_Rate*Melt_Temp*Viscosity + Inj_Speed*Inj_Press*Melt_Temp +
    Flow_Rate*Inj_Speed*Inj_Press*Viscosity*Screw_Speed
Flow_Rate*Inj_Speed + Inj_Press*Viscosity +
    Flow_Rate*Inj_Press*Melt_Temp*Screw_Speed +
    Inj_Speed*Melt_Temp*Viscosity*Screw_Speed
Flow_Rate*Inj_Press + Inj_Speed*Viscosity +
    Flow_Rate*Inj_Speed*Melt_Temp*Screw_Speed +
    Inj_Press*Melt_Temp*Viscosity*Screw_Speed
Flow_Rate*Melt_Temp + Viscosity*Screw_Speed +
    Flow_Rate*Inj_Speed*Inj_Press*Screw_Speed +
    Inj_Speed*Inj_Press*Melt_Temp*Viscosity
Flow_Rate*Viscosity + Inj_Speed*Inj_Press + Melt_Temp*Screw_Speed +
    Flow_Rate*Inj_Speed*Inj_Press*Melt_Temp*Viscosity*Screw_Speed
Flow_Rate*Screw_Speed + Melt_Temp*Viscosity +
    Flow_Rate*Inj_Speed*Inj_Press*Melt_Temp +
    Inj_Speed*Inj_Press*Viscosity*Screw_Speed
Inj_Speed*Melt_Temp + Inj_Press*Screw_Speed +
    Flow_Rate*Inj_Press*Melt_Temp*Viscosity +
    Flow_Rate*Inj_Speed*Viscosity*Screw_Speed
Inj_Speed*Screw_Speed + Inj_Press*Melt_Temp +
    Flow_Rate*Inj_Speed*Melt_Temp*Viscosity +
    Flow_Rate*Inj_Press*Viscosity*Screw_Speed
Flow_Rate*Inj_Speed*Melt_Temp + Flow_Rate*Inj_Press*Screw_Speed +
    Inj_Speed*Viscosity*Screw_Speed + Inj_Press*Melt_Temp*Viscosity
Flow_Rate*Inj_Press*Melt_Temp + Flow_Rate*Inj_Speed*Screw_Speed +
    Inj_Speed*Melt_Temp*Viscosity + Inj_Press*Viscosity*Screw_Speed

```

## Factorial Fit: Bubbles versus Flow\_Rate, Inj\_Speed, ...

Estimated Effects and Coefficients for Bubbles (coded units)

| Term     | Effect | Coef   |
|----------|--------|--------|
| Constant |        | 13.875 |



|                               |        |        |
|-------------------------------|--------|--------|
| Flow_Rate                     | 1.500  | 0.750  |
| Inj_Speed                     | 0.000  | 0.000  |
| Inj_Press                     | -2.000 | -1.000 |
| Melt_Temp                     | -4.250 | -2.125 |
| Viscosity                     | -1.000 | -0.500 |
| Screw_Speed                   | -0.250 | -0.125 |
| Flow_Rate*Inj_Speed           | 1.250  | 0.625  |
| Flow_Rate*Inj_Press           | -3.250 | -1.625 |
| Flow_Rate*Melt_Temp           | 1.500  | 0.750  |
| Flow_Rate*Viscosity           | -4.250 | -2.125 |
| Flow_Rate*Screw_Speed         | -1.000 | -0.500 |
| Inj_Speed*Melt_Temp           | -2.500 | -1.250 |
| Inj_Speed*Screw_Speed         | 1.500  | 0.750  |
| Flow_Rate*Inj_Speed*Melt_Temp | -4.250 | -2.125 |
| Flow_Rate*Inj_Press*Melt_Temp | 5.250  | 2.625  |

S = \*      PRESS = \*

#### Analysis of Variance for Bubbles (coded units)

| Source                        | DF | Seq SS  | Adj SS  | Adj MS  | F | P |
|-------------------------------|----|---------|---------|---------|---|---|
| Main Effects                  | 6  | 101.500 | 101.500 | 16.917  | * | * |
| Flow_Rate                     | 1  | 9.000   | 9.000   | 9.000   | * | * |
| Inj_Speed                     | 1  | 0.000   | 0.000   | 0.000   | * | * |
| Inj_Press                     | 1  | 16.000  | 16.000  | 16.000  | * | * |
| Melt_Temp                     | 1  | 72.250  | 72.250  | 72.250  | * | * |
| Viscosity                     | 1  | 4.000   | 4.000   | 4.000   | * | * |
| Screw_Speed                   | 1  | 0.250   | 0.250   | 0.250   | * | * |
| 2-Way Interactions            | 7  | 167.750 | 167.750 | 23.964  | * | * |
| Flow_Rate*Inj_Speed           | 1  | 6.250   | 6.250   | 6.250   | * | * |
| Flow_Rate*Inj_Press           | 1  | 42.250  | 42.250  | 42.250  | * | * |
| Flow_Rate*Melt_Temp           | 1  | 9.000   | 9.000   | 9.000   | * | * |
| Flow_Rate*Viscosity           | 1  | 72.250  | 72.250  | 72.250  | * | * |
| Flow_Rate*Screw_Speed         | 1  | 4.000   | 4.000   | 4.000   | * | * |
| Inj_Speed*Melt_Temp           | 1  | 25.000  | 25.000  | 25.000  | * | * |
| Inj_Speed*Screw_Speed         | 1  | 9.000   | 9.000   | 9.000   | * | * |
| 3-Way Interactions            | 2  | 182.500 | 182.500 | 91.250  | * | * |
| Flow_Rate*Inj_Speed*Melt_Temp | 1  | 72.250  | 72.250  | 72.250  | * | * |
| Flow_Rate*Inj_Press*Melt_Temp | 1  | 110.250 | 110.250 | 110.250 | * | * |
| Residual Error                | 0  | *       | *       | *       |   |   |
| Total                         | 15 | 451.750 |         |         |   |   |

#### Estimated Coefficients for Bubbles using data in uncoded units

| Term                          | Coef      |
|-------------------------------|-----------|
| Constant                      | 495.869   |
| Flow_Rate                     | 1144.84   |
| Inj_Speed                     | -48.8683  |
| Inj_Press                     | 4.50569   |
| Melt_Temp                     | -55.4187  |
| Viscosity                     | 238.913   |
| Screw_Speed                   | 676.893   |
| Flow_Rate*Inj_Speed           | 185.915   |
| Flow_Rate*Inj_Press           | -58.2160  |
| Flow_Rate*Melt_Temp           | -3.52113  |
| Flow_Rate*Viscosity           | -79.8122  |
| Flow_Rate*Screw_Speed         | -4.69484  |
| Inj_Speed*Melt_Temp           | 2.35913   |
| Inj_Speed*Screw_Speed         | -29.4599  |
| Flow_Rate*Inj_Speed*Melt_Temp | -0.798122 |

Flow\_Rate\*Inj\_Press\*Melt\_Temp 0.246479

## Effects Pareto for Bubbles

Alias Structure

```
I + Flow_Rate*Inj_Speed*Inj_Press*Viscosity +
    Flow_Rate*Melt_Temp*Viscosity*Screw_Speed +
    Inj_Speed*Inj_Press*Melt_Temp*Screw_Speed
Flow_Rate + Inj_Speed*Inj_Press*Viscosity + Melt_Temp*Viscosity*Screw_Speed +
    Flow_Rate*Inj_Speed*Inj_Press*Melt_Temp*Screw_Speed
Inj_Speed + Flow_Rate*Inj_Press*Viscosity + Inj_Press*Melt_Temp*Screw_Speed +
    Flow_Rate*Inj_Speed*Melt_Temp*Viscosity*Screw_Speed
Inj_Press + Flow_Rate*Inj_Speed*Viscosity + Inj_Speed*Melt_Temp*Screw_Speed +
    Flow_Rate*Inj_Press*Melt_Temp*Viscosity*Screw_Speed
Melt_Temp + Flow_Rate*Viscosity*Screw_Speed + Inj_Speed*Inj_Press*Screw_Speed +
    Flow_Rate*Inj_Speed*Inj_Press*Melt_Temp*Viscosity
Viscosity + Flow_Rate*Inj_Speed*Inj_Press + Flow_Rate*Melt_Temp*Screw_Speed +
    Inj_Speed*Inj_Press*Melt_Temp*Viscosity*Screw_Speed
Screw_Speed + Flow_Rate*Melt_Temp*Viscosity + Inj_Speed*Inj_Press*Melt_Temp +
    Flow_Rate*Inj_Speed*Inj_Press*Viscosity*Screw_Speed
Flow_Rate*Inj_Speed + Inj_Press*Viscosity +
    Flow_Rate*Inj_Press*Melt_Temp*Screw_Speed +
    Inj_Speed*Melt_Temp*Viscosity*Screw_Speed
Flow_Rate*Inj_Press + Inj_Speed*Viscosity +
    Flow_Rate*Inj_Speed*Melt_Temp*Screw_Speed +
    Inj_Press*Melt_Temp*Viscosity*Screw_Speed
Flow_Rate*Melt_Temp + Viscosity*Screw_Speed +
    Flow_Rate*Inj_Speed*Inj_Press*Screw_Speed +
    Inj_Speed*Inj_Press*Melt_Temp*Viscosity
Flow_Rate*Viscosity + Inj_Speed*Inj_Press + Melt_Temp*Screw_Speed +
    Flow_Rate*Inj_Speed*Inj_Press*Melt_Temp*Viscosity*Screw_Speed
Flow_Rate*Screw_Speed + Melt_Temp*Viscosity +
    Flow_Rate*Inj_Speed*Inj_Press*Melt_Temp +
    Inj_Speed*Inj_Press*Viscosity*Screw_Speed
Inj_Speed*Melt_Temp + Inj_Press*Screw_Speed +
    Flow_Rate*Inj_Speed*Viscosity*Screw_Speed +
    Flow_Rate*Inj_Press*Melt_Temp*Viscosity
Inj_Speed*Screw_Speed + Inj_Press*Melt_Temp +
    Flow_Rate*Inj_Speed*Melt_Temp*Viscosity +
    Flow_Rate*Inj_Press*Viscosity*Screw_Speed
Flow_Rate*Inj_Speed*Melt_Temp + Flow_Rate*Inj_Press*Screw_Speed +
    Inj_Speed*Viscosity*Screw_Speed + Inj_Press*Melt_Temp*Viscosity
Flow_Rate*Inj_Speed*Screw_Speed + Flow_Rate*Inj_Press*Melt_Temp +
    Inj_Speed*Melt_Temp*Viscosity + Inj_Press*Viscosity*Screw_Speed
```

Alias Information for Terms in the Model.

Totally confounded terms were removed from the analysis.

```
I + Flow_Rate*Inj_Speed*Inj_Press*Viscosity +
    Flow_Rate*Melt_Temp*Viscosity*Screw_Speed +
    Inj_Speed*Inj_Press*Melt_Temp*Screw_Speed
Flow_Rate + Inj_Speed*Inj_Press*Viscosity + Melt_Temp*Viscosity*Screw_Speed +
    Flow_Rate*Inj_Speed*Inj_Press*Melt_Temp*Screw_Speed
Inj_Speed + Flow_Rate*Inj_Press*Viscosity + Inj_Press*Melt_Temp*Screw_Speed +
    Flow_Rate*Inj_Speed*Melt_Temp*Viscosity*Screw_Speed
Inj_Press + Flow_Rate*Inj_Speed*Viscosity + Inj_Speed*Melt_Temp*Screw_Speed +
    Flow_Rate*Inj_Press*Melt_Temp*Viscosity*Screw_Speed
Melt_Temp + Flow_Rate*Viscosity*Screw_Speed + Inj_Speed*Inj_Press*Screw_Speed +
    Flow_Rate*Inj_Speed*Inj_Press*Melt_Temp*Viscosity
```

Viscosity + Flow\_Rate\*Inj\_Speed\*Inj\_Press + Flow\_Rate\*Melt\_Temp\*Screw\_Speed +  
 Inj\_Speed\*Inj\_Press\*Melt\_Temp\*Viscosity\*Screw\_Speed  
 Screw\_Speed + Flow\_Rate\*Melt\_Temp\*Viscosity + Inj\_Speed\*Inj\_Press\*Melt\_Temp +  
 Flow\_Rate\*Inj\_Speed\*Inj\_Press\*Viscosity\*Screw\_Speed  
 Flow\_Rate\*Inj\_Speed + Inj\_Press\*Viscosity +  
 Flow\_Rate\*Inj\_Press\*Melt\_Temp\*Screw\_Speed +  
 Inj\_Speed\*Melt\_Temp\*Viscosity\*Screw\_Speed  
 Flow\_Rate\*Inj\_Press + Inj\_Speed\*Viscosity +  
 Flow\_Rate\*Inj\_Speed\*Melt\_Temp\*Screw\_Speed +  
 Inj\_Press\*Melt\_Temp\*Viscosity\*Screw\_Speed  
 Flow\_Rate\*Melt\_Temp + Viscosity\*Screw\_Speed +  
 Flow\_Rate\*Inj\_Speed\*Inj\_Press\*Screw\_Speed +  
 Inj\_Speed\*Inj\_Press\*Melt\_Temp\*Viscosity  
 Flow\_Rate\*Viscosity + Inj\_Speed\*Inj\_Press + Melt\_Temp\*Screw\_Speed +  
 Flow\_Rate\*Inj\_Speed\*Inj\_Press\*Melt\_Temp\*Viscosity\*Screw\_Speed  
 Flow\_Rate\*Screw\_Speed + Melt\_Temp\*Viscosity +  
 Flow\_Rate\*Inj\_Speed\*Inj\_Press\*Melt\_Temp +  
 Inj\_Speed\*Inj\_Press\*Viscosity\*Screw\_Speed  
 Inj\_Speed\*Melt\_Temp + Inj\_Press\*Screw\_Speed +  
 Flow\_Rate\*Inj\_Press\*Melt\_Temp\*Viscosity +  
 Flow\_Rate\*Inj\_Speed\*Viscosity\*Screw\_Speed  
 Inj\_Speed\*Screw\_Speed + Inj\_Press\*Melt\_Temp +  
 Flow\_Rate\*Inj\_Speed\*Melt\_Temp\*Viscosity +  
 Flow\_Rate\*Inj\_Press\*Viscosity\*Screw\_Speed  
 Flow\_Rate\*Inj\_Speed\*Melt\_Temp + Flow\_Rate\*Inj\_Press\*Screw\_Speed +  
 Inj\_Speed\*Viscosity\*Screw\_Speed + Inj\_Press\*Melt\_Temp\*Viscosity  
 Flow\_Rate\*Inj\_Press\*Melt\_Temp + Flow\_Rate\*Inj\_Speed\*Screw\_Speed +  
 Inj\_Speed\*Melt\_Temp\*Viscosity + Inj\_Press\*Viscosity\*Screw\_Speed

## Factorial Fit: Bubbles versus Flow\_Rate, Inj\_Speed, ...

Estimated Effects and Coefficients for Bubbles (coded units)

| Term                          | Effect | Coef   |
|-------------------------------|--------|--------|
| Constant                      |        | 14.188 |
| Flow_Rate                     | 0.875  | 0.438  |
| Inj_Speed                     | 0.625  | 0.313  |
| Inj_Press                     | -2.625 | -1.313 |
| Melt_Temp                     | -3.625 | -1.812 |
| Viscosity                     | -0.375 | -0.188 |
| Screw_Speed                   | -0.875 | -0.438 |
| Flow_Rate*Inj_Speed           | 0.625  | 0.312  |
| Flow_Rate*Inj_Press           | -2.625 | -1.313 |
| Flow_Rate*Melt_Temp           | 0.875  | 0.437  |
| Flow_Rate*Viscosity           | -4.875 | -2.438 |
| Flow_Rate*Screw_Speed         | -0.375 | -0.188 |
| Inj_Speed*Melt_Temp           | -1.875 | -0.938 |
| Inj_Speed*Screw_Speed         | 0.875  | 0.438  |
| Flow_Rate*Inj_Speed*Melt_Temp | -4.875 | -2.438 |
| Flow_Rate*Inj_Press*Melt_Temp | 5.875  | 2.938  |

S = \* PRESS = \*

Analysis of Variance for Bubbles (coded units)

| Source       | DF | Seq SS | Adj SS | Adj MS | F | P |
|--------------|----|--------|--------|--------|---|---|
| Main Effects | 6  | 88.375 | 88.375 | 14.729 | * | * |
| Flow_Rate    | 1  | 3.063  | 3.063  | 3.063  | * | * |
| Inj_Speed    | 1  | 1.563  | 1.563  | 1.563  | * | * |
| Inj_Press    | 1  | 27.563 | 27.562 | 27.562 | * | * |

|                               |    |         |         |         |   |   |
|-------------------------------|----|---------|---------|---------|---|---|
| Melt_Temp                     | 1  | 52.562  | 52.562  | 52.562  | * | * |
| Viscosity                     | 1  | 0.563   | 0.563   | 0.563   | * | * |
| Screw_Speed                   | 1  | 3.062   | 3.063   | 3.063   | * | * |
| 2-Way Interactions            | 7  | 144.938 | 144.938 | 20.705  | * | * |
| Flow_Rate*Inj_Speed           | 1  | 1.562   | 1.562   | 1.562   | * | * |
| Flow_Rate*Inj_Press           | 1  | 27.563  | 27.563  | 27.563  | * | * |
| Flow_Rate*Melt_Temp           | 1  | 3.062   | 3.062   | 3.062   | * | * |
| Flow_Rate*Viscosity           | 1  | 95.063  | 95.063  | 95.063  | * | * |
| Flow_Rate*Screw_Speed         | 1  | 0.563   | 0.563   | 0.563   | * | * |
| Inj_Speed*Melt_Temp           | 1  | 14.063  | 14.063  | 14.063  | * | * |
| Inj_Speed*Screw_Speed         | 1  | 3.063   | 3.063   | 3.063   | * | * |
| 3-Way Interactions            | 2  | 233.125 | 233.125 | 116.563 | * | * |
| Flow_Rate*Inj_Speed*Melt_Temp | 1  | 95.063  | 95.063  | 95.063  | * | * |
| Flow_Rate*Inj_Press*Melt_Temp | 1  | 138.063 | 138.063 | 138.063 | * | * |
| Residual Error                | 0  | *       | *       | *       |   |   |
| Total                         | 15 | 466.438 |         |         |   |   |

Estimated Coefficients for Bubbles using data in uncoded units

| Term                          | Coef      |
|-------------------------------|-----------|
| Constant                      | 869.989   |
| Flow_Rate                     | 1183.57   |
| Inj_Speed                     | -67.2075  |
| Inj_Press                     | 3.58873   |
| Melt_Temp                     | -62.7543  |
| Viscosity                     | 275.592   |
| Screw_Speed                   | 750.250   |
| Flow_Rate*Inj_Speed           | 211.737   |
| Flow_Rate*Inj_Press           | -64.6714  |
| Flow_Rate*Melt_Temp           | -3.81455  |
| Flow_Rate*Viscosity           | -91.5493  |
| Flow_Rate*Screw_Speed         | -1.76056  |
| Inj_Speed*Melt_Temp           | 2.72592   |
| Inj_Speed*Screw_Speed         | -33.1277  |
| Flow_Rate*Inj_Speed*Melt_Temp | -0.915493 |
| Flow_Rate*Inj_Press*Melt_Temp | 0.275822  |

## Effects Pareto for Bubbles

Alias Structure

```

I + Flow_Rate*Inj_Speed*Inj_Press*Viscosity +
    Flow_Rate*Melt_Temp*Viscosity*Screw_Speed +
    Inj_Speed*Inj_Press*Melt_Temp*Screw_Speed
Flow_Rate + Inj_Speed*Inj_Press*Viscosity + Melt_Temp*Viscosity*Screw_Speed +
    Flow_Rate*Inj_Speed*Inj_Press*Melt_Temp*Screw_Speed
Inj_Speed + Flow_Rate*Inj_Press*Viscosity + Inj_Press*Melt_Temp*Screw_Speed +
    Flow_Rate*Inj_Speed*Melt_Temp*Viscosity*Screw_Speed
Inj_Press + Flow_Rate*Inj_Speed*Viscosity + Inj_Speed*Melt_Temp*Screw_Speed +
    Flow_Rate*Inj_Press*Melt_Temp*Viscosity*Screw_Speed
Melt_Temp + Flow_Rate*Viscosity*Screw_Speed + Inj_Speed*Inj_Press*Screw_Speed +
    Flow_Rate*Inj_Speed*Inj_Press*Melt_Temp*Viscosity
Viscosity + Flow_Rate*Inj_Speed*Inj_Press + Flow_Rate*Melt_Temp*Screw_Speed +
    Inj_Speed*Inj_Press*Melt_Temp*Viscosity*Screw_Speed
Screw_Speed + Flow_Rate*Melt_Temp*Viscosity + Inj_Speed*Inj_Press*Melt_Temp +
    Flow_Rate*Inj_Speed*Inj_Press*Viscosity*Screw_Speed
Flow_Rate*Inj_Speed + Inj_Press*Viscosity +
    Flow_Rate*Inj_Press*Melt_Temp*Screw_Speed +
    Inj_Speed*Melt_Temp*Viscosity*Screw_Speed
Flow_Rate*Inj_Press + Inj_Speed*Viscosity +

```

```

Flow_Rate*Inj_Speed*Melt_Temp*Screw_Speed +
Inj_Press*Melt_Temp*Viscosity*Screw_Speed
Flow_Rate*Melt_Temp + Viscosity*Screw_Speed +
Flow_Rate*Inj_Speed*Inj_Press*Screw_Speed +
Inj_Speed*Inj_Press*Melt_Temp*Viscosity
Flow_Rate*Viscosity + Inj_Speed*Inj_Press + Melt_Temp*Screw_Speed +
Flow_Rate*Inj_Speed*Inj_Press*Melt_Temp*Viscosity*Screw_Speed
Flow_Rate*Screw_Speed + Melt_Temp*Viscosity +
Flow_Rate*Inj_Speed*Inj_Press*Melt_Temp +
Inj_Speed*Inj_Press*Viscosity*Screw_Speed
Inj_Speed*Melt_Temp + Inj_Press*Screw_Speed +
Flow_Rate*Inj_Speed*Viscosity*Screw_Speed +
Flow_Rate*Inj_Press*Melt_Temp*Viscosity
Inj_Speed*Screw_Speed + Inj_Press*Melt_Temp +
Flow_Rate*Inj_Speed*Melt_Temp*Viscosity +
Flow_Rate*Inj_Press*Viscosity*Screw_Speed
Flow_Rate*Inj_Speed*Melt_Temp + Flow_Rate*Inj_Press*Screw_Speed +
Inj_Speed*Viscosity*Screw_Speed + Inj_Press*Melt_Temp*Viscosity
Flow_Rate*Inj_Speed*Screw_Speed + Flow_Rate*Inj_Press*Melt_Temp +
Inj_Speed*Melt_Temp*Viscosity + Inj_Press*Viscosity*Screw_Speed

```

Alias Information for Terms in the Model.  
Totally confounded terms were removed from the analysis.

```

I + Flow_Rate*Inj_Speed*Inj_Press*Viscosity +
Flow_Rate*Melt_Temp*Viscosity*Screw_Speed +
Inj_Speed*Inj_Press*Melt_Temp*Screw_Speed
Flow_Rate + Inj_Speed*Inj_Press*Viscosity + Melt_Temp*Viscosity*Screw_Speed +
Flow_Rate*Inj_Speed*Inj_Press*Melt_Temp*Screw_Speed
Inj_Speed + Flow_Rate*Inj_Press*Viscosity + Inj_Press*Melt_Temp*Screw_Speed +
Flow_Rate*Inj_Speed*Melt_Temp*Viscosity*Screw_Speed
Inj_Press + Flow_Rate*Inj_Speed*Viscosity + Inj_Speed*Melt_Temp*Screw_Speed +
Flow_Rate*Inj_Press*Melt_Temp*Viscosity*Screw_Speed
Melt_Temp + Flow_Rate*Viscosity*Screw_Speed + Inj_Speed*Inj_Press*Screw_Speed +
Flow_Rate*Inj_Speed*Inj_Press*Melt_Temp*Viscosity
Viscosity + Flow_Rate*Inj_Speed*Inj_Press + Flow_Rate*Melt_Temp*Screw_Speed +
Inj_Speed*Inj_Press*Melt_Temp*Viscosity*Screw_Speed
Screw_Speed + Flow_Rate*Melt_Temp*Viscosity + Inj_Speed*Inj_Press*Melt_Temp +
Flow_Rate*Inj_Speed*Inj_Press*Viscosity*Screw_Speed
Flow_Rate*Inj_Speed + Inj_Press*Viscosity +
Flow_Rate*Inj_Press*Melt_Temp*Screw_Speed +
Inj_Speed*Melt_Temp*Viscosity*Screw_Speed
Flow_Rate*Inj_Press + Inj_Speed*Viscosity +
Flow_Rate*Inj_Speed*Melt_Temp*Screw_Speed +
Inj_Press*Melt_Temp*Viscosity*Screw_Speed
Flow_Rate*Melt_Temp + Viscosity*Screw_Speed +
Flow_Rate*Inj_Speed*Inj_Press*Screw_Speed +
Inj_Speed*Inj_Press*Melt_Temp*Viscosity
Flow_Rate*Viscosity + Inj_Speed*Inj_Press + Melt_Temp*Screw_Speed +
Flow_Rate*Inj_Speed*Inj_Press*Melt_Temp*Viscosity*Screw_Speed
Flow_Rate*Screw_Speed + Melt_Temp*Viscosity +
Flow_Rate*Inj_Speed*Inj_Press*Melt_Temp +
Inj_Speed*Inj_Press*Viscosity*Screw_Speed
Inj_Speed*Melt_Temp + Inj_Press*Screw_Speed +
Flow_Rate*Inj_Press*Melt_Temp*Viscosity +
Flow_Rate*Inj_Speed*Viscosity*Screw_Speed
Inj_Speed*Screw_Speed + Inj_Press*Melt_Temp +
Flow_Rate*Inj_Speed*Melt_Temp*Viscosity +
Flow_Rate*Inj_Press*Viscosity*Screw_Speed
Flow_Rate*Inj_Speed*Melt_Temp + Flow_Rate*Inj_Press*Screw_Speed +
Inj_Speed*Viscosity*Screw_Speed + Inj_Press*Melt_Temp*Viscosity
Flow_Rate*Inj_Press*Melt_Temp + Flow_Rate*Inj_Speed*Screw_Speed +

```

Inj\_Speed\*Melt\_Temp\*Viscosity + Inj\_Press\*Viscosity\*Screw\_Speed

## Factorial Fit: Bubbles versus Flow\_Rate, Inj\_Speed, ...

Estimated Effects and Coefficients for Bubbles (coded units)

| Term                          | Effect | Coef   |
|-------------------------------|--------|--------|
| Constant                      |        | 14.250 |
| Flow_Rate                     | 0.750  | 0.375  |
| Inj_Speed                     | 0.750  | 0.375  |
| Inj_Press                     | -2.750 | -1.375 |
| Melt_Temp                     | -3.500 | -1.750 |
| Viscosity                     | -0.250 | -0.125 |
| Screw_Speed                   | -1.000 | -0.500 |
| Flow_Rate*Inj_Speed           | 0.500  | 0.250  |
| Flow_Rate*Inj_Press           | -2.500 | -1.250 |
| Flow_Rate*Melt_Temp           | 0.750  | 0.375  |
| Flow_Rate*Viscosity           | -5.000 | -2.500 |
| Flow_Rate*Screw_Speed         | -0.250 | -0.125 |
| Inj_Speed*Melt_Temp           | -1.750 | -0.875 |
| Inj_Speed*Screw_Speed         | 0.750  | 0.375  |
| Flow_Rate*Inj_Speed*Melt_Temp | -5.000 | -2.500 |
| Flow_Rate*Inj_Press*Melt_Temp | 6.000  | 3.000  |

S = \* PRESS = \*

Analysis of Variance for Bubbles (coded units)

| Source                        | DF | Seq SS  | Adj SS  | Adj MS  | F | P |
|-------------------------------|----|---------|---------|---------|---|---|
| Main Effects                  | 6  | 88.000  | 88.000  | 14.667  | * | * |
| Flow_Rate                     | 1  | 2.250   | 2.250   | 2.250   | * | * |
| Inj_Speed                     | 1  | 2.250   | 2.250   | 2.250   | * | * |
| Inj_Press                     | 1  | 30.250  | 30.250  | 30.250  | * | * |
| Melt_Temp                     | 1  | 49.000  | 49.000  | 49.000  | * | * |
| Viscosity                     | 1  | 0.250   | 0.250   | 0.250   | * | * |
| Screw_Speed                   | 1  | 4.000   | 4.000   | 4.000   | * | * |
| 2-Way Interactions            | 7  | 143.000 | 143.000 | 20.429  | * | * |
| Flow_Rate*Inj_Speed           | 1  | 1.000   | 1.000   | 1.000   | * | * |
| Flow_Rate*Inj_Press           | 1  | 25.000  | 25.000  | 25.000  | * | * |
| Flow_Rate*Melt_Temp           | 1  | 2.250   | 2.250   | 2.250   | * | * |
| Flow_Rate*Viscosity           | 1  | 100.000 | 100.000 | 100.000 | * | * |
| Flow_Rate*Screw_Speed         | 1  | 0.250   | 0.250   | 0.250   | * | * |
| Inj_Speed*Melt_Temp           | 1  | 12.250  | 12.250  | 12.250  | * | * |
| Inj_Speed*Screw_Speed         | 1  | 2.250   | 2.250   | 2.250   | * | * |
| 3-Way Interactions            | 2  | 244.000 | 244.000 | 122.000 | * | * |
| Flow_Rate*Inj_Speed*Melt_Temp | 1  | 100.000 | 100.000 | 100.000 | * | * |
| Flow_Rate*Inj_Press*Melt_Temp | 1  | 144.000 | 144.000 | 144.000 | * | * |
| Residual Error                | 0  | *       | *       | *       |   |   |
| Total                         | 15 | 475.000 |         |         |   |   |

Estimated Coefficients for Bubbles using data in uncoded units

| Term      | Coef     |
|-----------|----------|
| Constant  | 944.813  |
| Flow_Rate | 1191.31  |
| Inj_Speed | -70.8754 |
| Inj_Press | 3.40534  |
| Melt_Temp | -64.2215 |
| Viscosity | 282.927  |

|                               |           |
|-------------------------------|-----------|
| Screw_Speed                   | 764.921   |
| Flow_Rate*Inj_Speed           | 216.901   |
| Flow_Rate*Inj_Press           | -65.9624  |
| Flow_Rate*Melt_Temp           | -3.87324  |
| Flow_Rate*Viscosity           | -93.8967  |
| Flow_Rate*Screw_Speed         | -1.17371  |
| Inj_Speed*Melt_Temp           | 2.79927   |
| Inj_Speed*Screw_Speed         | -33.8613  |
| Flow_Rate*Inj_Speed*Melt_Temp | -0.938967 |
| Flow_Rate*Inj_Press*Melt_Temp | 0.281690  |

## Effects Pareto for Bubbles

Alias Structure

```

I + Flow_Rate*Inj_Speed*Inj_Press*Viscosity +
    Flow_Rate*Melt_Temp*Viscosity*Screw_Speed +
    Inj_Speed*Inj_Press*Melt_Temp*Screw_Speed
Flow_Rate + Inj_Speed*Inj_Press*Viscosity + Melt_Temp*Viscosity*Screw_Speed +
    Flow_Rate*Inj_Speed*Inj_Press*Melt_Temp*Screw_Speed
Inj_Speed + Flow_Rate*Inj_Press*Viscosity + Inj_Press*Melt_Temp*Screw_Speed +
    Flow_Rate*Inj_Speed*Melt_Temp*Viscosity*Screw_Speed
Inj_Press + Flow_Rate*Inj_Speed*Viscosity + Inj_Speed*Melt_Temp*Screw_Speed +
    Flow_Rate*Inj_Press*Melt_Temp*Viscosity*Screw_Speed
Melt_Temp + Flow_Rate*Viscosity*Screw_Speed + Inj_Speed*Inj_Press*Screw_Speed +
    Flow_Rate*Inj_Speed*Inj_Press*Melt_Temp*Viscosity
Viscosity + Flow_Rate*Inj_Speed*Inj_Press + Flow_Rate*Melt_Temp*Screw_Speed +
    Inj_Speed*Inj_Press*Melt_Temp*Viscosity*Screw_Speed
Screw_Speed + Flow_Rate*Melt_Temp*Viscosity + Inj_Speed*Inj_Press*Melt_Temp +
    Flow_Rate*Inj_Speed*Inj_Press*Viscosity*Screw_Speed
Flow_Rate*Inj_Speed + Inj_Press*Viscosity +
    Flow_Rate*Inj_Press*Melt_Temp*Screw_Speed +
    Inj_Speed*Melt_Temp*Viscosity*Screw_Speed
Flow_Rate*Inj_Press + Inj_Speed*Viscosity +
    Flow_Rate*Inj_Speed*Inj_Press*Melt_Temp*Screw_Speed +
    Inj_Press*Melt_Temp*Viscosity*Screw_Speed
Flow_Rate*Melt_Temp + Viscosity*Screw_Speed +
    Flow_Rate*Inj_Speed*Inj_Press*Screw_Speed +
    Inj_Speed*Inj_Press*Melt_Temp*Viscosity
Flow_Rate*Viscosity + Inj_Speed*Inj_Press + Melt_Temp*Screw_Speed +
    Flow_Rate*Inj_Speed*Inj_Press*Melt_Temp*Viscosity*Screw_Speed
Flow_Rate*Screw_Speed + Melt_Temp*Viscosity +
    Flow_Rate*Inj_Speed*Inj_Press*Melt_Temp +
    Inj_Speed*Inj_Press*Viscosity*Screw_Speed
Inj_Speed*Melt_Temp + Inj_Press*Screw_Speed +
    Flow_Rate*Inj_Speed*Viscosity*Screw_Speed +
    Flow_Rate*Inj_Press*Melt_Temp*Viscosity
Inj_Speed*Screw_Speed + Inj_Press*Melt_Temp +
    Flow_Rate*Inj_Speed*Melt_Temp*Viscosity +
    Flow_Rate*Inj_Press*Viscosity*Screw_Speed
Flow_Rate*Inj_Speed*Melt_Temp + Flow_Rate*Inj_Press*Screw_Speed +
    Inj_Speed*Viscosity*Screw_Speed + Inj_Press*Melt_Temp*Viscosity
Flow_Rate*Inj_Speed*Screw_Speed + Flow_Rate*Inj_Press*Melt_Temp +
    Inj_Speed*Melt_Temp*Viscosity + Inj_Press*Viscosity*Screw_Speed

```

Alias Information for Terms in the Model.

Totally confounded terms were removed from the analysis.

```

I + Flow_Rate*Inj_Speed*Inj_Press*Viscosity +
    Flow_Rate*Melt_Temp*Viscosity*Screw_Speed +

```

Inj\_Speed\*Inj\_Press\*Melt\_Temp\*Screw\_Speed  
 Flow\_Rate + Inj\_Speed\*Inj\_Press\*Viscosity + Melt\_Temp\*Viscosity\*Screw\_Speed +  
 Flow\_Rate\*Inj\_Speed\*Inj\_Press\*Melt\_Temp\*Screw\_Speed  
 Inj\_Speed + Flow\_Rate\*Inj\_Press\*Viscosity + Inj\_Press\*Melt\_Temp\*Screw\_Speed +  
 Flow\_Rate\*Inj\_Speed\*Melt\_Temp\*Viscosity\*Screw\_Speed  
 Inj\_Press + Flow\_Rate\*Inj\_Speed\*Viscosity + Inj\_Speed\*Melt\_Temp\*Screw\_Speed +  
 Flow\_Rate\*Inj\_Press\*Melt\_Temp\*Viscosity\*Screw\_Speed  
 Melt\_Temp + Flow\_Rate\*Viscosity\*Screw\_Speed + Inj\_Speed\*Inj\_Press\*Screw\_Speed +  
 Flow\_Rate\*Inj\_Speed\*Inj\_Press\*Melt\_Temp\*Viscosity  
 Viscosity + Flow\_Rate\*Inj\_Speed\*Inj\_Press + Flow\_Rate\*Melt\_Temp\*Screw\_Speed +  
 Inj\_Speed\*Inj\_Press\*Melt\_Temp\*Viscosity\*Screw\_Speed  
 Screw\_Speed + Flow\_Rate\*Melt\_Temp\*Viscosity + Inj\_Speed\*Inj\_Press\*Melt\_Temp +  
 Flow\_Rate\*Inj\_Speed\*Inj\_Press\*Viscosity\*Screw\_Speed  
 Flow\_Rate\*Inj\_Speed + Inj\_Press\*Viscosity +  
 Flow\_Rate\*Inj\_Press\*Melt\_Temp\*Screw\_Speed +  
 Inj\_Speed\*Melt\_Temp\*Viscosity\*Screw\_Speed  
 Flow\_Rate\*Inj\_Press + Inj\_Speed\*Viscosity +  
 Flow\_Rate\*Inj\_Speed\*Melt\_Temp\*Screw\_Speed +  
 Inj\_Press\*Melt\_Temp\*Viscosity\*Screw\_Speed  
 Flow\_Rate\*Melt\_Temp + Viscosity\*Screw\_Speed +  
 Flow\_Rate\*Inj\_Speed\*Inj\_Press\*Screw\_Speed +  
 Inj\_Speed\*Inj\_Press\*Melt\_Temp\*Viscosity  
 Flow\_Rate\*Viscosity + Inj\_Speed\*Inj\_Press + Melt\_Temp\*Screw\_Speed +  
 Flow\_Rate\*Inj\_Speed\*Inj\_Press\*Melt\_Temp\*Viscosity\*Screw\_Speed  
 Flow\_Rate\*Screw\_Speed + Melt\_Temp\*Viscosity +  
 Flow\_Rate\*Inj\_Speed\*Inj\_Press\*Melt\_Temp +  
 Inj\_Speed\*Inj\_Press\*Viscosity\*Screw\_Speed  
 Inj\_Speed\*Melt\_Temp + Inj\_Press\*Screw\_Speed +  
 Flow\_Rate\*Inj\_Press\*Melt\_Temp\*Viscosity +  
 Flow\_Rate\*Inj\_Speed\*Viscosity\*Screw\_Speed  
 Inj\_Speed\*Screw\_Speed + Inj\_Press\*Melt\_Temp +  
 Flow\_Rate\*Inj\_Speed\*Melt\_Temp\*Viscosity +  
 Flow\_Rate\*Inj\_Press\*Viscosity\*Screw\_Speed  
 Flow\_Rate\*Inj\_Speed\*Melt\_Temp + Flow\_Rate\*Inj\_Press\*Screw\_Speed +  
 Inj\_Speed\*Viscosity\*Screw\_Speed + Inj\_Press\*Melt\_Temp\*Viscosity  
 Flow\_Rate\*Inj\_Press\*Melt\_Temp + Flow\_Rate\*Inj\_Speed\*Screw\_Speed +  
 Inj\_Speed\*Melt\_Temp\*Viscosity + Inj\_Press\*Viscosity\*Screw\_Speed

## Factorial Fit: Bubbles versus Flow\_Rate, Inj\_Speed, ...

Estimated Effects and Coefficients for Bubbles (coded units)

| Term                          | Effect | Coef   |
|-------------------------------|--------|--------|
| Constant                      |        | 14.438 |
| Flow_Rate                     | 0.375  | 0.188  |
| Inj_Speed                     | 0.375  | 0.188  |
| Inj_Press                     | -2.375 | -1.187 |
| Melt_Temp                     | -3.875 | -1.937 |
| Viscosity                     | 0.125  | 0.062  |
| Screw_Speed                   | -0.625 | -0.313 |
| Flow_Rate*Inj_Speed           | 0.875  | 0.437  |
| Flow_Rate*Inj_Press           | -2.875 | -1.438 |
| Flow_Rate*Melt_Temp           | 1.125  | 0.563  |
| Flow_Rate*Viscosity           | -5.375 | -2.688 |
| Flow_Rate*Screw_Speed         | -0.625 | -0.313 |
| Inj_Speed*Melt_Temp           | -1.375 | -0.688 |
| Inj_Speed*Screw_Speed         | 0.375  | 0.188  |
| Flow_Rate*Inj_Speed*Melt_Temp | -5.375 | -2.688 |
| Flow_Rate*Inj_Press*Melt_Temp | 6.375  | 3.187  |

S = \* PRESS = \*



# Analysis of Variance for Bubbles (coded units)

| Source                        | DF | Seq SS  | Adj SS  | Adj MS  | F | P |
|-------------------------------|----|---------|---------|---------|---|---|
| Main Effects                  | 6  | 85.375  | 85.375  | 14.229  | * | * |
| Flow_Rate                     | 1  | 0.562   | 0.563   | 0.563   | * | * |
| Inj_Speed                     | 1  | 0.562   | 0.563   | 0.563   | * | * |
| Inj_Press                     | 1  | 22.563  | 22.562  | 22.562  | * | * |
| Melt_Temp                     | 1  | 60.062  | 60.062  | 60.062  | * | * |
| Viscosity                     | 1  | 0.062   | 0.062   | 0.062   | * | * |
| Screw_Speed                   | 1  | 1.562   | 1.563   | 1.563   | * | * |
| 2-Way Interactions            | 7  | 166.438 | 166.437 | 23.777  | * | * |
| Flow_Rate*Inj_Speed           | 1  | 3.062   | 3.062   | 3.062   | * | * |
| Flow_Rate*Inj_Press           | 1  | 33.063  | 33.063  | 33.063  | * | * |
| Flow_Rate*Melt_Temp           | 1  | 5.062   | 5.063   | 5.063   | * | * |
| Flow_Rate*Viscosity           | 1  | 115.563 | 115.562 | 115.562 | * | * |
| Flow_Rate*Screw_Speed         | 1  | 1.563   | 1.563   | 1.563   | * | * |
| Inj_Speed*Melt_Temp           | 1  | 7.563   | 7.563   | 7.563   | * | * |
| Inj_Speed*Screw_Speed         | 1  | 0.562   | 0.563   | 0.563   | * | * |
| 3-Way Interactions            | 2  | 278.125 | 278.125 | 139.063 | * | * |
| Flow_Rate*Inj_Speed*Melt_Temp | 1  | 115.563 | 115.563 | 115.563 | * | * |
| Flow_Rate*Inj_Press*Melt_Temp | 1  | 162.562 | 162.562 | 162.562 | * | * |
| Residual Error                | 0  | *       | *       | *       |   |   |
| Total                         | 15 | 529.938 |         |         |   |   |

## Estimated Coefficients for Bubbles using data in uncoded units

| Term                          | Coef     |
|-------------------------------|----------|
| Constant                      | 1235.31  |
| Flow_Rate                     | 1193.43  |
| Inj_Speed                     | -86.2803 |
| Inj_Press                     | 3.95552  |
| Melt_Temp                     | -69.7232 |
| Viscosity                     | 304.934  |
| Screw_Speed                   | 819.939  |
| Flow_Rate*Inj_Speed           | 233.803  |
| Flow_Rate*Inj_Press           | -70.1878 |
| Flow_Rate*Melt_Temp           | -3.69718 |
| Flow_Rate*Viscosity           | -100.939 |
| Flow_Rate*Screw_Speed         | -2.93427 |
| Inj_Speed*Melt_Temp           | 3.01934  |
| Inj_Speed*Screw_Speed         | -36.0620 |
| Flow_Rate*Inj_Speed*Melt_Temp | -1.00939 |
| Flow_Rate*Inj_Press*Melt_Temp | 0.299296 |

## Effects Pareto for Bubbles

### Alias Structure

I + Flow\_Rate\*Inj\_Speed\*Inj\_Press\*Viscosity +  
     Flow\_Rate\*Melt\_Temp\*Viscosity\*Screw\_Speed +  
     Inj\_Speed\*Inj\_Press\*Melt\_Temp\*Screw\_Speed  
 Flow\_Rate + Inj\_Speed\*Inj\_Press\*Viscosity + Melt\_Temp\*Viscosity\*Screw\_Speed +  
     Flow\_Rate\*Inj\_Speed\*Inj\_Press\*Melt\_Temp\*Screw\_Speed  
 Inj\_Speed + Flow\_Rate\*Inj\_Press\*Viscosity + Inj\_Press\*Melt\_Temp\*Screw\_Speed +  
     Flow\_Rate\*Inj\_Speed\*Melt\_Temp\*Viscosity\*Screw\_Speed  
 Inj\_Press + Flow\_Rate\*Inj\_Speed\*Viscosity + Inj\_Speed\*Melt\_Temp\*Screw\_Speed +  
     Flow\_Rate\*Inj\_Press\*Melt\_Temp\*Viscosity\*Screw\_Speed  
 Melt\_Temp + Flow\_Rate\*Viscosity\*Screw\_Speed + Inj\_Speed\*Inj\_Press\*Screw\_Speed +



```

Inj_Speed*Melt_Temp + Inj_Press*Screw_Speed +
  Flow_Rate*Inj_Press*Melt_Temp*Viscosity +
  Flow_Rate*Inj_Speed*Viscosity*Screw_Speed
Inj_Speed*Screw_Speed + Inj_Press*Melt_Temp +
  Flow_Rate*Inj_Speed*Melt_Temp*Viscosity +
  Flow_Rate*Inj_Press*Viscosity*Screw_Speed
Flow_Rate*Inj_Speed*Melt_Temp + Flow_Rate*Inj_Press*Screw_Speed +
  Inj_Speed*Viscosity*Screw_Speed + Inj_Press*Melt_Temp*Viscosity
Flow_Rate*Inj_Press*Melt_Temp + Flow_Rate*Inj_Speed*Screw_Speed +
  Inj_Speed*Melt_Temp*Viscosity + Inj_Press*Viscosity*Screw_Speed

```

## Factorial Fit: Bubbles versus Flow\_Rate, Inj\_Speed, ...

Estimated Effects and Coefficients for Bubbles (coded units)

| Term                          | Effect | Coef   |
|-------------------------------|--------|--------|
| Constant                      |        | 14.813 |
| Flow_Rate                     | -0.375 | -0.187 |
| Inj_Speed                     | 1.125  | 0.562  |
| Inj_Press                     | -3.125 | -1.563 |
| Melt_Temp                     | -4.625 | -2.312 |
| Viscosity                     | 0.875  | 0.437  |
| Screw_Speed                   | 0.125  | 0.062  |
| Flow_Rate*Inj_Speed           | 0.125  | 0.062  |
| Flow_Rate*Inj_Press           | -2.125 | -1.063 |
| Flow_Rate*Melt_Temp           | 1.875  | 0.938  |
| Flow_Rate*Viscosity           | -6.125 | -3.063 |
| Flow_Rate*Screw_Speed         | -1.375 | -0.688 |
| Inj_Speed*Melt_Temp           | -2.125 | -1.063 |
| Inj_Speed*Screw_Speed         | 1.125  | 0.563  |
| Flow_Rate*Inj_Speed*Melt_Temp | -4.625 | -2.313 |
| Flow_Rate*Inj_Press*Melt_Temp | 5.625  | 2.813  |

S = \* PRESS = \*

Analysis of Variance for Bubbles (coded units)

| Source                        | DF | Seq SS  | Adj SS  | Adj MS  | F | P |
|-------------------------------|----|---------|---------|---------|---|---|
| Main Effects                  | 6  | 133.375 | 133.375 | 22.229  | * | * |
| Flow_Rate                     | 1  | 0.562   | 0.562   | 0.562   | * | * |
| Inj_Speed                     | 1  | 5.062   | 5.062   | 5.062   | * | * |
| Inj_Press                     | 1  | 39.063  | 39.063  | 39.063  | * | * |
| Melt_Temp                     | 1  | 85.562  | 85.562  | 85.562  | * | * |
| Viscosity                     | 1  | 3.062   | 3.062   | 3.062   | * | * |
| Screw_Speed                   | 1  | 0.063   | 0.062   | 0.062   | * | * |
| 2-Way Interactions            | 7  | 212.938 | 212.938 | 30.420  | * | * |
| Flow_Rate*Inj_Speed           | 1  | 0.062   | 0.062   | 0.062   | * | * |
| Flow_Rate*Inj_Press           | 1  | 18.063  | 18.063  | 18.063  | * | * |
| Flow_Rate*Melt_Temp           | 1  | 14.063  | 14.063  | 14.063  | * | * |
| Flow_Rate*Viscosity           | 1  | 150.063 | 150.063 | 150.063 | * | * |
| Flow_Rate*Screw_Speed         | 1  | 7.563   | 7.563   | 7.563   | * | * |
| Inj_Speed*Melt_Temp           | 1  | 18.063  | 18.063  | 18.063  | * | * |
| Inj_Speed*Screw_Speed         | 1  | 5.063   | 5.063   | 5.063   | * | * |
| 3-Way Interactions            | 2  | 212.125 | 212.125 | 106.063 | * | * |
| Flow_Rate*Inj_Speed*Melt_Temp | 1  | 85.563  | 85.563  | 85.563  | * | * |
| Flow_Rate*Inj_Press*Melt_Temp | 1  | 126.563 | 126.563 | 126.563 | * | * |
| Residual Error                | 0  | *       | *       | *       |   |   |
| Total                         | 15 | 558.438 |         |         |   |   |

Estimated Coefficients for Bubbles using data in uncoded units

| Term                          | Coef      |
|-------------------------------|-----------|
| Constant                      | 627.912   |
| Flow_Rate                     | 1197.65   |
| Inj_Speed                     | -55.4704  |
| Inj_Press                     | 2.85516   |
| Melt_Temp                     | -60.9204  |
| Viscosity                     | 348.948   |
| Screw_Speed                   | 731.911   |
| Flow_Rate*Inj_Speed           | 200.000   |
| Flow_Rate*Inj_Press           | -61.7371  |
| Flow_Rate*Melt_Temp           | -3.34507  |
| Flow_Rate*Viscosity           | -115.023  |
| Flow_Rate*Screw_Speed         | -6.45540  |
| Inj_Speed*Melt_Temp           | 2.57920   |
| Inj_Speed*Screw_Speed         | -31.6606  |
| Flow_Rate*Inj_Speed*Melt_Temp | -0.868545 |
| Flow_Rate*Inj_Press*Melt_Temp | 0.264085  |

## Effects Pareto for Bubbles

Alias Structure

I + Flow\_Rate\*Inj\_Speed\*Inj\_Press\*Viscosity +  
Flow\_Rate\*Melt\_Temp\*Viscosity\*Screw\_Speed +  
Inj\_Speed\*Inj\_Press\*Melt\_Temp\*Screw\_Speed  
Flow\_Rate + Inj\_Speed\*Inj\_Press\*Viscosity + Melt\_Temp\*Viscosity\*Screw\_Speed +  
Flow\_Rate\*Inj\_Speed\*Inj\_Press\*Melt\_Temp\*Screw\_Speed  
Inj\_Speed + Flow\_Rate\*Inj\_Press\*Viscosity + Inj\_Press\*Melt\_Temp\*Screw\_Speed +  
Flow\_Rate\*Inj\_Speed\*Melt\_Temp\*Viscosity\*Screw\_Speed  
Inj\_Press + Flow\_Rate\*Inj\_Speed\*Viscosity + Inj\_Speed\*Melt\_Temp\*Screw\_Speed +  
Flow\_Rate\*Inj\_Press\*Melt\_Temp\*Viscosity\*Screw\_Speed  
Melt\_Temp + Flow\_Rate\*Viscosity\*Screw\_Speed + Inj\_Speed\*Inj\_Press\*Screw\_Speed +  
Flow\_Rate\*Inj\_Speed\*Inj\_Press\*Melt\_Temp\*Viscosity  
Viscosity + Flow\_Rate\*Inj\_Speed\*Inj\_Press + Flow\_Rate\*Melt\_Temp\*Screw\_Speed +  
Inj\_Speed\*Inj\_Press\*Melt\_Temp\*Viscosity\*Screw\_Speed  
Screw\_Speed + Flow\_Rate\*Melt\_Temp\*Viscosity + Inj\_Speed\*Inj\_Press\*Melt\_Temp +  
Flow\_Rate\*Inj\_Speed\*Inj\_Press\*Viscosity\*Screw\_Speed  
Flow\_Rate\*Inj\_Speed + Inj\_Press\*Viscosity +  
Flow\_Rate\*Inj\_Speed\*Inj\_Press\*Melt\_Temp\*Screw\_Speed +  
Inj\_Speed\*Melt\_Temp\*Viscosity\*Screw\_Speed  
Flow\_Rate\*Inj\_Press + Inj\_Speed\*Viscosity +  
Flow\_Rate\*Inj\_Speed\*Melt\_Temp\*Screw\_Speed +  
Inj\_Press\*Melt\_Temp\*Viscosity\*Screw\_Speed  
Flow\_Rate\*Melt\_Temp + Viscosity\*Screw\_Speed +  
Flow\_Rate\*Inj\_Speed\*Inj\_Press\*Screw\_Speed +  
Inj\_Speed\*Inj\_Press\*Melt\_Temp\*Viscosity  
Flow\_Rate\*Viscosity + Inj\_Speed\*Inj\_Press + Melt\_Temp\*Screw\_Speed +  
Flow\_Rate\*Inj\_Speed\*Inj\_Press\*Melt\_Temp\*Viscosity\*Screw\_Speed  
Flow\_Rate\*Screw\_Speed + Melt\_Temp\*Viscosity +  
Flow\_Rate\*Inj\_Speed\*Inj\_Press\*Melt\_Temp +  
Inj\_Speed\*Inj\_Press\*Viscosity\*Screw\_Speed  
Inj\_Speed\*Melt\_Temp + Inj\_Press\*Screw\_Speed +  
Flow\_Rate\*Inj\_Speed\*Viscosity\*Screw\_Speed +  
Flow\_Rate\*Inj\_Press\*Melt\_Temp\*Viscosity  
Inj\_Speed\*Screw\_Speed + Inj\_Press\*Melt\_Temp +  
Flow\_Rate\*Inj\_Speed\*Melt\_Temp\*Viscosity +  
Flow\_Rate\*Inj\_Press\*Viscosity\*Screw\_Speed  
Flow\_Rate\*Inj\_Speed\*Melt\_Temp + Flow\_Rate\*Inj\_Press\*Screw\_Speed +  
Inj\_Speed\*Viscosity\*Screw\_Speed + Inj\_Press\*Melt\_Temp\*Viscosity

Flow\_Rate\*Inj\_Speed\*Screw\_Speed + Flow\_Rate\*Inj\_Press\*Melt\_Temp +  
 Inj\_Speed\*Melt\_Temp\*Viscosity + Inj\_Press\*Viscosity\*Screw\_Speed

Alias Information for Terms in the Model.  
 Totally confounded terms were removed from the analysis.

I + Flow\_Rate\*Inj\_Speed\*Inj\_Press\*Viscosity +  
 Flow\_Rate\*Melt\_Temp\*Viscosity\*Screw\_Speed +  
 Inj\_Speed\*Inj\_Press\*Melt\_Temp\*Screw\_Speed  
 Flow\_Rate + Inj\_Speed\*Inj\_Press\*Viscosity + Melt\_Temp\*Viscosity\*Screw\_Speed +  
 Flow\_Rate\*Inj\_Speed\*Inj\_Press\*Melt\_Temp\*Screw\_Speed  
 Inj\_Speed + Flow\_Rate\*Inj\_Press\*Viscosity + Inj\_Press\*Melt\_Temp\*Screw\_Speed +  
 Flow\_Rate\*Inj\_Speed\*Melt\_Temp\*Viscosity\*Screw\_Speed  
 Inj\_Press + Flow\_Rate\*Inj\_Speed\*Viscosity + Inj\_Speed\*Melt\_Temp\*Screw\_Speed +  
 Flow\_Rate\*Inj\_Press\*Melt\_Temp\*Viscosity\*Screw\_Speed  
 Melt\_Temp + Flow\_Rate\*Viscosity\*Screw\_Speed + Inj\_Speed\*Inj\_Press\*Screw\_Speed +  
 Flow\_Rate\*Inj\_Speed\*Inj\_Press\*Melt\_Temp\*Viscosity  
 Viscosity + Flow\_Rate\*Inj\_Speed\*Inj\_Press + Flow\_Rate\*Melt\_Temp\*Screw\_Speed +  
 Inj\_Speed\*Inj\_Press\*Melt\_Temp\*Viscosity\*Screw\_Speed  
 Screw\_Speed + Flow\_Rate\*Melt\_Temp\*Viscosity + Inj\_Speed\*Inj\_Press\*Melt\_Temp +  
 Flow\_Rate\*Inj\_Speed\*Inj\_Press\*Viscosity\*Screw\_Speed  
 Flow\_Rate\*Inj\_Speed + Inj\_Press\*Viscosity +  
 Flow\_Rate\*Inj\_Press\*Melt\_Temp\*Screw\_Speed +  
 Inj\_Speed\*Melt\_Temp\*Viscosity\*Screw\_Speed  
 Flow\_Rate\*Inj\_Press + Inj\_Speed\*Viscosity +  
 Flow\_Rate\*Inj\_Speed\*Melt\_Temp\*Screw\_Speed +  
 Inj\_Press\*Melt\_Temp\*Viscosity\*Screw\_Speed  
 Flow\_Rate\*Melt\_Temp + Viscosity\*Screw\_Speed +  
 Flow\_Rate\*Inj\_Speed\*Inj\_Press\*Screw\_Speed +  
 Inj\_Speed\*Inj\_Press\*Melt\_Temp\*Viscosity  
 Flow\_Rate\*Viscosity + Inj\_Speed\*Inj\_Press + Melt\_Temp\*Screw\_Speed +  
 Flow\_Rate\*Inj\_Speed\*Inj\_Press\*Melt\_Temp\*Viscosity\*Screw\_Speed  
 Flow\_Rate\*Screw\_Speed + Melt\_Temp\*Viscosity +  
 Flow\_Rate\*Inj\_Speed\*Inj\_Press\*Melt\_Temp +  
 Inj\_Speed\*Inj\_Press\*Viscosity\*Screw\_Speed  
 Inj\_Speed\*Melt\_Temp + Inj\_Press\*Screw\_Speed +  
 Flow\_Rate\*Inj\_Press\*Melt\_Temp\*Viscosity +  
 Flow\_Rate\*Inj\_Speed\*Viscosity\*Screw\_Speed  
 Inj\_Speed\*Screw\_Speed + Inj\_Press\*Melt\_Temp +  
 Flow\_Rate\*Inj\_Speed\*Melt\_Temp\*Viscosity +  
 Flow\_Rate\*Inj\_Press\*Viscosity\*Screw\_Speed  
 Flow\_Rate\*Inj\_Speed\*Melt\_Temp + Flow\_Rate\*Inj\_Press\*Screw\_Speed +  
 Inj\_Speed\*Viscosity\*Screw\_Speed + Inj\_Press\*Melt\_Temp\*Viscosity  
 Flow\_Rate\*Inj\_Press\*Melt\_Temp + Flow\_Rate\*Inj\_Speed\*Screw\_Speed +  
 Inj\_Speed\*Melt\_Temp\*Viscosity + Inj\_Press\*Viscosity\*Screw\_Speed

## Factorial Fit: Bubbles versus Flow\_Rate, Inj\_Speed, ...

Estimated Effects and Coefficients for Bubbles (coded units)

| Term                | Effect | Coef   |
|---------------------|--------|--------|
| Constant            |        | 14.250 |
| Flow_Rate           | 0.750  | 0.375  |
| Inj_Speed           | 0.000  | 0.000  |
| Inj_Press           | -2.000 | -1.000 |
| Melt_Temp           | -3.500 | -1.750 |
| Viscosity           | -0.250 | -0.125 |
| Screw_Speed         | -1.000 | -0.500 |
| Flow_Rate*Inj_Speed | 1.250  | 0.625  |
| Flow_Rate*Inj_Press | -3.250 | -1.625 |
| Flow_Rate*Melt_Temp | 0.750  | 0.375  |

|                               |        |        |
|-------------------------------|--------|--------|
| Flow_Rate*Viscosity           | -5.000 | -2.500 |
| Flow_Rate*Screw_Speed         | -0.250 | -0.125 |
| Inj_Speed*Melt_Temp           | -1.000 | -0.500 |
| Inj_Speed*Screw_Speed         | -0.000 | -0.000 |
| Flow_Rate*Inj_Speed*Melt_Temp | -5.750 | -2.875 |
| Flow_Rate*Inj_Press*Melt_Temp | 6.750  | 3.375  |

S = \* PRESS = \*

#### Analysis of Variance for Bubbles (coded units)

| Source                        | DF | Seq SS  | Adj SS  | Adj MS  | F | P |
|-------------------------------|----|---------|---------|---------|---|---|
| Main Effects                  | 6  | 71.500  | 71.500  | 11.917  | * | * |
| Flow_Rate                     | 1  | 2.250   | 2.250   | 2.250   | * | * |
| Inj_Speed                     | 1  | 0.000   | 0.000   | 0.000   | * | * |
| Inj_Press                     | 1  | 16.000  | 16.000  | 16.000  | * | * |
| Melt_Temp                     | 1  | 49.000  | 49.000  | 49.000  | * | * |
| Viscosity                     | 1  | 0.250   | 0.250   | 0.250   | * | * |
| Screw_Speed                   | 1  | 4.000   | 4.000   | 4.000   | * | * |
| 2-Way Interactions            | 7  | 155.000 | 155.000 | 22.143  | * | * |
| Flow_Rate*Inj_Speed           | 1  | 6.250   | 6.250   | 6.250   | * | * |
| Flow_Rate*Inj_Press           | 1  | 42.250  | 42.250  | 42.250  | * | * |
| Flow_Rate*Melt_Temp           | 1  | 2.250   | 2.250   | 2.250   | * | * |
| Flow_Rate*Viscosity           | 1  | 100.000 | 100.000 | 100.000 | * | * |
| Flow_Rate*Screw_Speed         | 1  | 0.250   | 0.250   | 0.250   | * | * |
| Inj_Speed*Melt_Temp           | 1  | 4.000   | 4.000   | 4.000   | * | * |
| Inj_Speed*Screw_Speed         | 1  | 0.000   | 0.000   | 0.000   | * | * |
| 3-Way Interactions            | 2  | 314.500 | 314.500 | 157.250 | * | * |
| Flow_Rate*Inj_Speed*Melt_Temp | 1  | 132.250 | 132.250 | 132.250 | * | * |
| Flow_Rate*Inj_Press*Melt_Temp | 1  | 182.250 | 182.250 | 182.250 | * | * |
| Residual Error                | 0  | *       | *       | *       |   |   |
| Total                         | 15 | 541.000 |         |         |   |   |

#### Estimated Coefficients for Bubbles using data in uncoded units

| Term                          | Coef     |
|-------------------------------|----------|
| Constant                      | 1539.00  |
| Flow_Rate                     | 1191.31  |
| Inj_Speed                     | -101.685 |
| Inj_Press                     | 4.50569  |
| Melt_Temp                     | -74.1246 |
| Viscosity                     | 282.927  |
| Screw_Speed                   | 863.953  |
| Flow_Rate*Inj_Speed           | 250.704  |
| Flow_Rate*Inj_Press           | -74.4131 |
| Flow_Rate*Melt_Temp           | -3.87324 |
| Flow_Rate*Viscosity           | -93.8967 |
| Flow_Rate*Screw_Speed         | -1.17371 |
| Inj_Speed*Melt_Temp           | 3.23941  |
| Inj_Speed*Screw_Speed         | -38.2627 |
| Flow_Rate*Inj_Speed*Melt_Temp | -1.07981 |
| Flow_Rate*Inj_Press*Melt_Temp | 0.316901 |

### Effects Pareto for Bubbles

Alias Structure

I + Flow\_Rate\*Inj\_Speed\*Inj\_Press\*Viscosity +

```

Flow_Rate*Melt_Temp*Viscosity*Screw_Speed +
Inj_Speed*Inj_Press*Melt_Temp*Screw_Speed
Flow_Rate + Inj_Speed*Inj_Press*Viscosity + Melt_Temp*Viscosity*Screw_Speed +
Flow_Rate*Inj_Speed*Inj_Press*Melt_Temp*Screw_Speed
Inj_Speed + Flow_Rate*Inj_Press*Viscosity + Inj_Press*Melt_Temp*Screw_Speed +
Flow_Rate*Inj_Speed*Melt_Temp*Viscosity*Screw_Speed
Inj_Press + Flow_Rate*Inj_Speed*Viscosity + Inj_Speed*Melt_Temp*Screw_Speed +
Flow_Rate*Inj_Press*Melt_Temp*Viscosity*Screw_Speed
Melt_Temp + Flow_Rate*Viscosity*Screw_Speed + Inj_Speed*Inj_Press*Screw_Speed +
Flow_Rate*Inj_Speed*Inj_Press*Melt_Temp*Viscosity
Viscosity + Flow_Rate*Inj_Speed*Inj_Press + Flow_Rate*Melt_Temp*Screw_Speed +
Inj_Speed*Inj_Press*Melt_Temp*Viscosity*Screw_Speed
Screw_Speed + Flow_Rate*Melt_Temp*Viscosity + Inj_Speed*Inj_Press*Melt_Temp +
Flow_Rate*Inj_Speed*Inj_Press*Viscosity*Screw_Speed
Flow_Rate*Inj_Speed + Inj_Press*Viscosity +
Flow_Rate*Inj_Press*Melt_Temp*Screw_Speed +
Inj_Speed*Melt_Temp*Viscosity*Screw_Speed
Flow_Rate*Inj_Press + Inj_Speed*Viscosity +
Flow_Rate*Inj_Speed*Melt_Temp*Screw_Speed +
Inj_Press*Melt_Temp*Viscosity*Screw_Speed
Flow_Rate*Melt_Temp + Viscosity*Screw_Speed +
Flow_Rate*Inj_Speed*Inj_Press*Screw_Speed +
Inj_Speed*Inj_Press*Melt_Temp*Viscosity
Flow_Rate*Viscosity + Inj_Speed*Inj_Press + Melt_Temp*Screw_Speed +
Flow_Rate*Inj_Speed*Inj_Press*Melt_Temp*Viscosity*Screw_Speed
Flow_Rate*Screw_Speed + Melt_Temp*Viscosity +
Flow_Rate*Inj_Speed*Inj_Press*Melt_Temp +
Inj_Speed*Inj_Press*Viscosity*Screw_Speed
Inj_Speed*Melt_Temp + Inj_Press*Screw_Speed +
Flow_Rate*Inj_Speed*Viscosity*Screw_Speed +
Flow_Rate*Inj_Press*Melt_Temp*Viscosity
Inj_Speed*Screw_Speed + Inj_Press*Melt_Temp +
Flow_Rate*Inj_Speed*Melt_Temp*Viscosity +
Flow_Rate*Inj_Press*Viscosity*Screw_Speed
Flow_Rate*Inj_Speed*Melt_Temp + Flow_Rate*Inj_Press*Screw_Speed +
Inj_Speed*Viscosity*Screw_Speed + Inj_Press*Melt_Temp*Viscosity
Flow_Rate*Inj_Speed*Screw_Speed + Flow_Rate*Inj_Press*Melt_Temp +
Inj_Speed*Melt_Temp*Viscosity + Inj_Press*Viscosity*Screw_Speed

```

Alias Information for Terms in the Model.

Totally confounded terms were removed from the analysis.

```

I + Flow_Rate*Inj_Speed*Inj_Press*Viscosity +
Flow_Rate*Melt_Temp*Viscosity*Screw_Speed +
Inj_Speed*Inj_Press*Melt_Temp*Screw_Speed
Flow_Rate + Inj_Speed*Inj_Press*Viscosity + Melt_Temp*Viscosity*Screw_Speed +
Flow_Rate*Inj_Speed*Inj_Press*Melt_Temp*Screw_Speed
Inj_Speed + Flow_Rate*Inj_Press*Viscosity + Inj_Press*Melt_Temp*Screw_Speed +
Flow_Rate*Inj_Speed*Melt_Temp*Viscosity*Screw_Speed
Inj_Press + Flow_Rate*Inj_Speed*Viscosity + Inj_Speed*Melt_Temp*Screw_Speed +
Flow_Rate*Inj_Press*Melt_Temp*Viscosity*Screw_Speed
Melt_Temp + Flow_Rate*Viscosity*Screw_Speed + Inj_Speed*Inj_Press*Screw_Speed +
Flow_Rate*Inj_Speed*Inj_Press*Melt_Temp*Viscosity
Viscosity + Flow_Rate*Inj_Speed*Inj_Press + Flow_Rate*Melt_Temp*Screw_Speed +
Inj_Speed*Inj_Press*Melt_Temp*Viscosity*Screw_Speed
Screw_Speed + Flow_Rate*Melt_Temp*Viscosity + Inj_Speed*Inj_Press*Melt_Temp +
Flow_Rate*Inj_Speed*Inj_Press*Viscosity*Screw_Speed
Flow_Rate*Inj_Speed + Inj_Press*Viscosity +
Flow_Rate*Inj_Press*Melt_Temp*Screw_Speed +
Inj_Speed*Melt_Temp*Viscosity*Screw_Speed
Flow_Rate*Inj_Press + Inj_Speed*Viscosity +
Flow_Rate*Inj_Speed*Melt_Temp*Screw_Speed +

```

```

      Inj_Press*Melt_Temp*Viscosity*Screw_Speed
Flow_Rate*Melt_Temp + Viscosity*Screw_Speed +
      Flow_Rate*Inj_Speed*Inj_Press*Screw_Speed +
      Inj_Speed*Inj_Press*Melt_Temp*Viscosity
Flow_Rate*Viscosity + Inj_Speed*Inj_Press + Melt_Temp*Screw_Speed +
      Flow_Rate*Inj_Speed*Inj_Press*Melt_Temp*Viscosity*Screw_Speed
Flow_Rate*Screw_Speed + Melt_Temp*Viscosity +
      Flow_Rate*Inj_Speed*Inj_Press*Melt_Temp +
      Inj_Speed*Inj_Press*Viscosity*Screw_Speed
Inj_Speed*Melt_Temp + Inj_Press*Screw_Speed +
      Flow_Rate*Inj_Press*Melt_Temp*Viscosity +
      Flow_Rate*Inj_Speed*Viscosity*Screw_Speed
Inj_Speed*Screw_Speed + Inj_Press*Melt_Temp +
      Flow_Rate*Inj_Speed*Melt_Temp*Viscosity +
      Flow_Rate*Inj_Press*Viscosity*Screw_Speed
Flow_Rate*Inj_Speed*Melt_Temp + Flow_Rate*Inj_Press*Screw_Speed +
      Inj_Speed*Viscosity*Screw_Speed + Inj_Press*Melt_Temp*Viscosity
Flow_Rate*Inj_Press*Melt_Temp + Flow_Rate*Inj_Speed*Screw_Speed +
      Inj_Speed*Melt_Temp*Viscosity + Inj_Press*Viscosity*Screw_Speed

```

## Factorial Fit: Bubbles versus Flow\_Rate, Inj\_Speed, ...

Estimated Effects and Coefficients for Bubbles (coded units)

| Term                          | Effect | Coef   |
|-------------------------------|--------|--------|
| Constant                      |        | 14.125 |
| Flow_Rate                     | 1.000  | 0.500  |
| Inj_Speed                     | -0.250 | -0.125 |
| Inj_Press                     | -1.750 | -0.875 |
| Melt_Temp                     | -3.250 | -1.625 |
| Viscosity                     | -0.500 | -0.250 |
| Screw_Speed                   | -1.250 | -0.625 |
| Flow_Rate*Inj_Speed           | 1.500  | 0.750  |
| Flow_Rate*Inj_Press           | -3.500 | -1.750 |
| Flow_Rate*Melt_Temp           | 0.500  | 0.250  |
| Flow_Rate*Viscosity           | -4.750 | -2.375 |
| Flow_Rate*Screw_Speed         | -0.000 | -0.000 |
| Inj_Speed*Melt_Temp           | -0.750 | -0.375 |
| Inj_Speed*Screw_Speed         | -0.250 | -0.125 |
| Flow_Rate*Inj_Speed*Melt_Temp | -6.000 | -3.000 |
| Flow_Rate*Inj_Press*Melt_Temp | 7.000  | 3.500  |

S = \* PRESS = \*

Analysis of Variance for Bubbles (coded units)

| Source                | DF | Seq SS  | Adj SS  | Adj MS | F | P |
|-----------------------|----|---------|---------|--------|---|---|
| Main Effects          | 6  | 66.000  | 66.000  | 11.000 | * | * |
| Flow_Rate             | 1  | 4.000   | 4.000   | 4.000  | * | * |
| Inj_Speed             | 1  | 0.250   | 0.250   | 0.250  | * | * |
| Inj_Press             | 1  | 12.250  | 12.250  | 12.250 | * | * |
| Melt_Temp             | 1  | 42.250  | 42.250  | 42.250 | * | * |
| Viscosity             | 1  | 1.000   | 1.000   | 1.000  | * | * |
| Screw_Speed           | 1  | 6.250   | 6.250   | 6.250  | * | * |
| 2-Way Interactions    | 7  | 151.750 | 151.750 | 21.679 | * | * |
| Flow_Rate*Inj_Speed   | 1  | 9.000   | 9.000   | 9.000  | * | * |
| Flow_Rate*Inj_Press   | 1  | 49.000  | 49.000  | 49.000 | * | * |
| Flow_Rate*Melt_Temp   | 1  | 1.000   | 1.000   | 1.000  | * | * |
| Flow_Rate*Viscosity   | 1  | 90.250  | 90.250  | 90.250 | * | * |
| Flow_Rate*Screw_Speed | 1  | 0.000   | 0.000   | 0.000  | * | * |



|                               |    |         |         |         |   |   |
|-------------------------------|----|---------|---------|---------|---|---|
| Inj_Speed*Melt_Temp           | 1  | 2.250   | 2.250   | 2.250   | * | * |
| Inj_Speed*Screw_Speed         | 1  | 0.250   | 0.250   | 0.250   | * | * |
| 3-Way Interactions            | 2  | 340.000 | 340.000 | 170.000 | * | * |
| Flow_Rate*Inj_Speed*Melt_Temp | 1  | 144.000 | 144.000 | 144.000 | * | * |
| Flow_Rate*Inj_Press*Melt_Temp | 1  | 196.000 | 196.000 | 196.000 | * | * |
| Residual Error                | 0  | *       | *       | *       |   |   |
| Total                         | 15 | 557.750 |         |         |   |   |

Estimated Coefficients for Bubbles using data in uncoded units

| Term                          | Coef        |
|-------------------------------|-------------|
| Constant                      | 1741.47     |
| Flow_Rate                     | 1189.91     |
| Inj_Speed                     | -111.955    |
| Inj_Press                     | 4.87248     |
| Melt_Temp                     | -77.0589    |
| Viscosity                     | 268.256     |
| Screw_Speed                   | 893.296     |
| Flow_Rate*Inj_Speed           | 261.972     |
| Flow_Rate*Inj_Press           | -77.2300    |
| Flow_Rate*Melt_Temp           | -3.99061    |
| Flow_Rate*Viscosity           | -89.2019    |
| Flow_Rate*Screw_Speed         | 6.82859E-13 |
| Inj_Speed*Melt_Temp           | 3.38613     |
| Inj_Speed*Screw_Speed         | -39.7298    |
| Flow_Rate*Inj_Speed*Melt_Temp | -1.12676    |
| Flow_Rate*Inj_Press*Melt_Temp | 0.328638    |

## Effects Pareto for Bubbles

Alias Structure

```

I + Flow_Rate*Inj_Speed*Inj_Press*Viscosity +
    Flow_Rate*Melt_Temp*Viscosity*Screw_Speed +
    Inj_Speed*Inj_Press*Melt_Temp*Screw_Speed
Flow_Rate + Inj_Speed*Inj_Press*Viscosity + Melt_Temp*Viscosity*Screw_Speed +
    Flow_Rate*Inj_Speed*Inj_Press*Melt_Temp*Screw_Speed
Inj_Speed + Flow_Rate*Inj_Press*Viscosity + Inj_Press*Melt_Temp*Screw_Speed +
    Flow_Rate*Inj_Speed*Melt_Temp*Viscosity*Screw_Speed
Inj_Press + Flow_Rate*Inj_Speed*Viscosity + Inj_Speed*Melt_Temp*Screw_Speed +
    Flow_Rate*Inj_Press*Melt_Temp*Viscosity*Screw_Speed
Melt_Temp + Flow_Rate*Viscosity*Screw_Speed + Inj_Speed*Inj_Press*Screw_Speed +
    Flow_Rate*Inj_Speed*Inj_Press*Melt_Temp*Viscosity
Viscosity + Flow_Rate*Inj_Speed*Inj_Press + Flow_Rate*Melt_Temp*Screw_Speed +
    Inj_Speed*Inj_Press*Melt_Temp*Viscosity*Screw_Speed
Screw_Speed + Flow_Rate*Melt_Temp*Viscosity + Inj_Speed*Inj_Press*Melt_Temp +
    Flow_Rate*Inj_Speed*Inj_Press*Viscosity*Screw_Speed
Flow_Rate*Inj_Speed + Inj_Press*Viscosity +
    Flow_Rate*Inj_Press*Melt_Temp*Screw_Speed +
    Inj_Speed*Melt_Temp*Viscosity*Screw_Speed
Flow_Rate*Inj_Press + Inj_Speed*Viscosity +
    Flow_Rate*Inj_Speed*Melt_Temp*Screw_Speed +
    Inj_Press*Melt_Temp*Viscosity*Screw_Speed
Flow_Rate*Melt_Temp + Viscosity*Screw_Speed +
    Flow_Rate*Inj_Speed*Inj_Press*Screw_Speed +
    Inj_Speed*Inj_Press*Melt_Temp*Viscosity
Flow_Rate*Viscosity + Inj_Speed*Inj_Press + Melt_Temp*Screw_Speed +
    Flow_Rate*Inj_Speed*Inj_Press*Melt_Temp*Viscosity*Screw_Speed
Flow_Rate*Screw_Speed + Melt_Temp*Viscosity +
    Flow_Rate*Inj_Speed*Inj_Press*Melt_Temp +

```

```

    Inj_Speed*Inj_Press*Viscosity*Screw_Speed
Inj_Speed*Melt_Temp + Inj_Press*Screw_Speed +
    Flow_Rate*Inj_Speed*Viscosity*Screw_Speed +
    Flow_Rate*Inj_Press*Melt_Temp*Viscosity
Inj_Speed*Screw_Speed + Inj_Press*Melt_Temp +
    Flow_Rate*Inj_Speed*Melt_Temp*Viscosity +
    Flow_Rate*Inj_Press*Viscosity*Screw_Speed
Flow_Rate*Inj_Speed*Melt_Temp + Flow_Rate*Inj_Press*Screw_Speed +
    Inj_Speed*Viscosity*Screw_Speed + Inj_Press*Melt_Temp*Viscosity
Flow_Rate*Inj_Speed*Screw_Speed + Flow_Rate*Inj_Press*Melt_Temp +
    Inj_Speed*Melt_Temp*Viscosity + Inj_Press*Viscosity*Screw_Speed

```

Alias Information for Terms in the Model.  
Totally confounded terms were removed from the analysis.

```

I + Flow_Rate*Inj_Speed*Inj_Press*Viscosity +
    Flow_Rate*Melt_Temp*Viscosity*Screw_Speed +
    Inj_Speed*Inj_Press*Melt_Temp*Screw_Speed
Flow_Rate + Inj_Speed*Inj_Press*Viscosity + Melt_Temp*Viscosity*Screw_Speed +
    Flow_Rate*Inj_Speed*Inj_Press*Melt_Temp*Screw_Speed
Inj_Speed + Flow_Rate*Inj_Press*Viscosity + Inj_Press*Melt_Temp*Screw_Speed +
    Flow_Rate*Inj_Speed*Melt_Temp*Viscosity*Screw_Speed
Inj_Press + Flow_Rate*Inj_Speed*Viscosity + Inj_Speed*Melt_Temp*Screw_Speed +
    Flow_Rate*Inj_Press*Melt_Temp*Viscosity*Screw_Speed
Melt_Temp + Flow_Rate*Viscosity*Screw_Speed + Inj_Speed*Inj_Press*Screw_Speed +
    Flow_Rate*Inj_Speed*Inj_Press*Melt_Temp*Viscosity
Viscosity + Flow_Rate*Inj_Speed*Inj_Press + Flow_Rate*Melt_Temp*Screw_Speed +
    Inj_Speed*Inj_Press*Melt_Temp*Viscosity*Screw_Speed
Screw_Speed + Flow_Rate*Melt_Temp*Viscosity + Inj_Speed*Inj_Press*Melt_Temp +
    Flow_Rate*Inj_Speed*Inj_Press*Viscosity*Screw_Speed
Flow_Rate*Inj_Speed + Inj_Press*Viscosity +
    Flow_Rate*Inj_Press*Melt_Temp*Screw_Speed +
    Inj_Speed*Melt_Temp*Viscosity*Screw_Speed
Flow_Rate*Inj_Press + Inj_Speed*Viscosity +
    Flow_Rate*Inj_Speed*Melt_Temp*Screw_Speed +
    Inj_Press*Melt_Temp*Viscosity*Screw_Speed
Flow_Rate*Melt_Temp + Viscosity*Screw_Speed +
    Flow_Rate*Inj_Speed*Inj_Press*Screw_Speed +
    Inj_Speed*Inj_Press*Melt_Temp*Viscosity
Flow_Rate*Viscosity + Inj_Speed*Inj_Press + Melt_Temp*Screw_Speed +
    Flow_Rate*Inj_Speed*Inj_Press*Melt_Temp*Viscosity*Screw_Speed
Flow_Rate*Screw_Speed + Melt_Temp*Viscosity +
    Flow_Rate*Inj_Speed*Inj_Press*Melt_Temp +
    Inj_Speed*Inj_Press*Viscosity*Screw_Speed
Inj_Speed*Melt_Temp + Inj_Press*Screw_Speed +
    Flow_Rate*Inj_Press*Melt_Temp*Viscosity +
    Flow_Rate*Inj_Speed*Viscosity*Screw_Speed
Inj_Speed*Screw_Speed + Inj_Press*Melt_Temp +
    Flow_Rate*Inj_Speed*Melt_Temp*Viscosity +
    Flow_Rate*Inj_Press*Viscosity*Screw_Speed
Flow_Rate*Inj_Speed*Melt_Temp + Flow_Rate*Inj_Press*Screw_Speed +
    Inj_Speed*Viscosity*Screw_Speed + Inj_Press*Melt_Temp*Viscosity
Flow_Rate*Inj_Press*Melt_Temp + Flow_Rate*Inj_Speed*Screw_Speed +
    Inj_Speed*Melt_Temp*Viscosity + Inj_Press*Viscosity*Screw_Speed

```

## Factorial Fit: Bubbles versus Flow\_Rate, Inj\_Speed, ...

Estimated Effects and Coefficients for Bubbles (coded units)

| Term     | Effect | Coef   |
|----------|--------|--------|
| Constant |        | 13.875 |

|                               |        |        |
|-------------------------------|--------|--------|
| Flow_Rate                     | 0.500  | 0.250  |
| Inj_Speed                     | 0.250  | 0.125  |
| Inj_Press                     | -1.250 | -0.625 |
| Melt_Temp                     | -3.750 | -1.875 |
| Viscosity                     | -1.000 | -0.500 |
| Screw_Speed                   | -1.750 | -0.875 |
| Flow_Rate*Inj_Speed           | 2.000  | 1.000  |
| Flow_Rate*Inj_Press           | -3.000 | -1.500 |
| Flow_Rate*Melt_Temp           | -0.000 | -0.000 |
| Flow_Rate*Viscosity           | -5.250 | -2.625 |
| Flow_Rate*Screw_Speed         | -0.500 | -0.250 |
| Inj_Speed*Melt_Temp           | -0.250 | -0.125 |
| Inj_Speed*Screw_Speed         | 0.250  | 0.125  |
| Flow_Rate*Inj_Speed*Melt_Temp | -5.500 | -2.750 |
| Flow_Rate*Inj_Press*Melt_Temp | 7.500  | 3.750  |

S = \*      PRESS = \*

#### Analysis of Variance for Bubbles (coded units)

| Source                        | DF | Seq SS  | Adj SS  | Adj MS  | F | P |
|-------------------------------|----|---------|---------|---------|---|---|
| Main Effects                  | 6  | 80.000  | 80.000  | 13.333  | * | * |
| Flow_Rate                     | 1  | 1.000   | 1.000   | 1.000   | * | * |
| Inj_Speed                     | 1  | 0.250   | 0.250   | 0.250   | * | * |
| Inj_Press                     | 1  | 6.250   | 6.250   | 6.250   | * | * |
| Melt_Temp                     | 1  | 56.250  | 56.250  | 56.250  | * | * |
| Viscosity                     | 1  | 4.000   | 4.000   | 4.000   | * | * |
| Screw_Speed                   | 1  | 12.250  | 12.250  | 12.250  | * | * |
| 2-Way Interactions            | 7  | 163.750 | 163.750 | 23.393  | * | * |
| Flow_Rate*Inj_Speed           | 1  | 16.000  | 16.000  | 16.000  | * | * |
| Flow_Rate*Inj_Press           | 1  | 36.000  | 36.000  | 36.000  | * | * |
| Flow_Rate*Melt_Temp           | 1  | 0.000   | 0.000   | 0.000   | * | * |
| Flow_Rate*Viscosity           | 1  | 110.250 | 110.250 | 110.250 | * | * |
| Flow_Rate*Screw_Speed         | 1  | 1.000   | 1.000   | 1.000   | * | * |
| Inj_Speed*Melt_Temp           | 1  | 0.250   | 0.250   | 0.250   | * | * |
| Inj_Speed*Screw_Speed         | 1  | 0.250   | 0.250   | 0.250   | * | * |
| 3-Way Interactions            | 2  | 346.000 | 346.000 | 173.000 | * | * |
| Flow_Rate*Inj_Speed*Melt_Temp | 1  | 121.000 | 121.000 | 121.000 | * | * |
| Flow_Rate*Inj_Press*Melt_Temp | 1  | 225.000 | 225.000 | 225.000 | * | * |
| Residual Error                | 0  | *       | *       | *       |   |   |
| Total                         | 15 | 589.750 |         |         |   |   |

#### Estimated Coefficients for Bubbles using data in uncoded units

| Term                          | Coef     |
|-------------------------------|----------|
| Constant                      | -918.979 |
| Flow_Rate                     | 2230.28  |
| Inj_Speed                     | -5.31854 |
| Inj_Press                     | 4.18891  |
| Melt_Temp                     | -70.2232 |
| Viscosity                     | 295.599  |
| Screw_Speed                   | 961.653  |
| Flow_Rate*Inj_Speed           | 241.315  |
| Flow_Rate*Inj_Press           | -82.3944 |
| Flow_Rate*Melt_Temp           | -8.45070 |
| Flow_Rate*Viscosity           | -98.5915 |
| Flow_Rate*Screw_Speed         | -2.34742 |
| Inj_Speed*Melt_Temp           | 3.11270  |
| Inj_Speed*Screw_Speed         | -42.4641 |
| Flow_Rate*Inj_Speed*Melt_Temp | -1.03286 |

Flow\_Rate\*Inj\_Press\*Melt\_Temp 0.352113

## Effects Pareto for Bubbles

Alias Structure

```
I + Flow_Rate*Inj_Speed*Inj_Press*Viscosity +
    Flow_Rate*Melt_Temp*Viscosity*Screw_Speed +
    Inj_Speed*Inj_Press*Melt_Temp*Screw_Speed
Flow_Rate + Inj_Speed*Inj_Press*Viscosity + Melt_Temp*Viscosity*Screw_Speed +
    Flow_Rate*Inj_Speed*Inj_Press*Melt_Temp*Screw_Speed
Inj_Speed + Flow_Rate*Inj_Press*Viscosity + Inj_Press*Melt_Temp*Screw_Speed +
    Flow_Rate*Inj_Speed*Melt_Temp*Viscosity*Screw_Speed
Inj_Press + Flow_Rate*Inj_Speed*Viscosity + Inj_Speed*Melt_Temp*Screw_Speed +
    Flow_Rate*Inj_Press*Melt_Temp*Viscosity*Screw_Speed
Melt_Temp + Flow_Rate*Viscosity*Screw_Speed + Inj_Speed*Inj_Press*Screw_Speed +
    Flow_Rate*Inj_Speed*Inj_Press*Melt_Temp*Viscosity
Viscosity + Flow_Rate*Inj_Speed*Inj_Press + Flow_Rate*Melt_Temp*Screw_Speed +
    Inj_Speed*Inj_Press*Melt_Temp*Viscosity*Screw_Speed
Screw_Speed + Flow_Rate*Melt_Temp*Viscosity + Inj_Speed*Inj_Press*Melt_Temp +
    Flow_Rate*Inj_Speed*Inj_Press*Viscosity*Screw_Speed
Flow_Rate*Inj_Speed + Inj_Press*Viscosity +
    Flow_Rate*Inj_Press*Melt_Temp*Screw_Speed +
    Inj_Speed*Melt_Temp*Viscosity*Screw_Speed
Flow_Rate*Inj_Press + Inj_Speed*Viscosity +
    Flow_Rate*Inj_Speed*Melt_Temp*Screw_Speed +
    Inj_Press*Melt_Temp*Viscosity*Screw_Speed
Flow_Rate*Melt_Temp + Viscosity*Screw_Speed +
    Flow_Rate*Inj_Speed*Inj_Press*Screw_Speed +
    Inj_Speed*Inj_Press*Melt_Temp*Viscosity
Flow_Rate*Viscosity + Inj_Speed*Inj_Press + Melt_Temp*Screw_Speed +
    Flow_Rate*Inj_Speed*Inj_Press*Melt_Temp*Viscosity*Screw_Speed
Flow_Rate*Screw_Speed + Melt_Temp*Viscosity +
    Flow_Rate*Inj_Speed*Inj_Press*Melt_Temp +
    Inj_Speed*Inj_Press*Viscosity*Screw_Speed
Inj_Speed*Melt_Temp + Inj_Press*Screw_Speed +
    Flow_Rate*Inj_Speed*Viscosity*Screw_Speed +
    Flow_Rate*Inj_Press*Melt_Temp*Viscosity
Inj_Speed*Screw_Speed + Inj_Press*Melt_Temp +
    Flow_Rate*Inj_Speed*Melt_Temp*Viscosity +
    Flow_Rate*Inj_Press*Viscosity*Screw_Speed
Flow_Rate*Inj_Speed*Melt_Temp + Flow_Rate*Inj_Press*Screw_Speed +
    Inj_Speed*Viscosity*Screw_Speed + Inj_Press*Melt_Temp*Viscosity
Flow_Rate*Inj_Speed*Screw_Speed + Flow_Rate*Inj_Press*Melt_Temp +
    Inj_Speed*Melt_Temp*Viscosity + Inj_Press*Viscosity*Screw_Speed
```

## Response Optimization

Parameters

|         | Goal   | Lower | Target | Upper | Weight | Import |
|---------|--------|-------|--------|-------|--------|--------|
| Bubbles | Target | 0     | 1      | 2     | 1      | 1      |

Global Solution

|           |   |         |
|-----------|---|---------|
| Flow_Rate | = | 2.912   |
| Inj_Speed | = | 24.9574 |
| Inj_Press | = | 80.2292 |
| Melt_Temp | = | 220.331 |

Viscosity = 1.8  
Screw\_Speed = 18

Predicted Responses

Bubbles = 1 , desirability = 1.000000

Composite Desirability = 1.000000

## Optimization Plot

Alias Information for Terms in the Model.  
Totally confounded terms were removed from the analysis.

I + Flow\_Rate\*Inj\_Speed\*Inj\_Press\*Viscosity +  
Flow\_Rate\*Melt\_Temp\*Viscosity\*Screw\_Speed +  
Inj\_Speed\*Inj\_Press\*Melt\_Temp\*Screw\_Speed  
Flow\_Rate + Inj\_Speed\*Inj\_Press\*Viscosity + Melt\_Temp\*Viscosity\*Screw\_Speed +  
Flow\_Rate\*Inj\_Speed\*Inj\_Press\*Melt\_Temp\*Screw\_Speed  
Inj\_Speed + Flow\_Rate\*Inj\_Press\*Viscosity + Inj\_Press\*Melt\_Temp\*Screw\_Speed +  
Flow\_Rate\*Inj\_Speed\*Melt\_Temp\*Viscosity\*Screw\_Speed  
Inj\_Press + Flow\_Rate\*Inj\_Speed\*Viscosity + Inj\_Speed\*Melt\_Temp\*Screw\_Speed +  
Flow\_Rate\*Inj\_Press\*Melt\_Temp\*Viscosity\*Screw\_Speed  
Melt\_Temp + Flow\_Rate\*Viscosity\*Screw\_Speed + Inj\_Speed\*Inj\_Press\*Screw\_Speed +  
Flow\_Rate\*Inj\_Speed\*Inj\_Press\*Melt\_Temp\*Viscosity  
Viscosity + Flow\_Rate\*Inj\_Speed\*Inj\_Press + Flow\_Rate\*Melt\_Temp\*Screw\_Speed +  
Inj\_Speed\*Inj\_Press\*Melt\_Temp\*Viscosity\*Screw\_Speed  
Screw\_Speed + Flow\_Rate\*Melt\_Temp\*Viscosity + Inj\_Speed\*Inj\_Press\*Melt\_Temp +  
Flow\_Rate\*Inj\_Speed\*Inj\_Press\*Viscosity\*Screw\_Speed  
Flow\_Rate\*Inj\_Speed + Inj\_Press\*Viscosity +  
Flow\_Rate\*Inj\_Press\*Melt\_Temp\*Screw\_Speed +  
Inj\_Speed\*Melt\_Temp\*Viscosity\*Screw\_Speed  
Flow\_Rate\*Inj\_Press + Inj\_Speed\*Viscosity +  
Flow\_Rate\*Inj\_Speed\*Melt\_Temp\*Screw\_Speed +  
Inj\_Press\*Melt\_Temp\*Viscosity\*Screw\_Speed  
Flow\_Rate\*Melt\_Temp + Viscosity\*Screw\_Speed +  
Flow\_Rate\*Inj\_Speed\*Inj\_Press\*Screw\_Speed +  
Inj\_Speed\*Inj\_Press\*Melt\_Temp\*Viscosity  
Flow\_Rate\*Viscosity + Inj\_Speed\*Inj\_Press + Melt\_Temp\*Screw\_Speed +  
Flow\_Rate\*Inj\_Speed\*Inj\_Press\*Melt\_Temp\*Viscosity\*Screw\_Speed  
Flow\_Rate\*Screw\_Speed + Melt\_Temp\*Viscosity +  
Flow\_Rate\*Inj\_Speed\*Inj\_Press\*Melt\_Temp +  
Inj\_Speed\*Inj\_Press\*Viscosity\*Screw\_Speed  
Inj\_Speed\*Melt\_Temp + Inj\_Press\*Screw\_Speed +  
Flow\_Rate\*Inj\_Press\*Melt\_Temp\*Viscosity +  
Flow\_Rate\*Inj\_Speed\*Viscosity\*Screw\_Speed  
Inj\_Speed\*Screw\_Speed + Inj\_Press\*Melt\_Temp +  
Flow\_Rate\*Inj\_Speed\*Melt\_Temp\*Viscosity +  
Flow\_Rate\*Inj\_Press\*Viscosity\*Screw\_Speed  
Flow\_Rate\*Inj\_Speed\*Melt\_Temp + Flow\_Rate\*Inj\_Press\*Screw\_Speed +  
Inj\_Speed\*Viscosity\*Screw\_Speed + Inj\_Press\*Melt\_Temp\*Viscosity  
Flow\_Rate\*Inj\_Press\*Melt\_Temp + Flow\_Rate\*Inj\_Speed\*Screw\_Speed +  
Inj\_Speed\*Melt\_Temp\*Viscosity + Inj\_Press\*Viscosity\*Screw\_Speed

## Factorial Fit: Shrinkage versus Flow\_Rate, Inj\_Speed, ...

Estimated Effects and Coefficients for Shrinkage (coded units)

| Term                          | Effect | Coef   |
|-------------------------------|--------|--------|
| Constant                      |        | 13.875 |
| Flow_Rate                     | -2.500 | -1.250 |
| Inj_Speed                     | -2.750 | -1.375 |
| Inj_Press                     | -1.250 | -0.625 |
| Melt_Temp                     | -0.750 | -0.375 |
| Viscosity                     | -1.000 | -0.500 |
| Screw_Speed                   | -1.750 | -0.875 |
| Flow_Rate*Inj_Speed           | 2.000  | 1.000  |
| Flow_Rate*Inj_Press           | -0.000 | -0.000 |
| Flow_Rate*Melt_Temp           | -0.000 | -0.000 |
| Flow_Rate*Viscosity           | -2.250 | -1.125 |
| Flow_Rate*Screw_Speed         | -3.500 | -1.750 |
| Inj_Speed*Melt_Temp           | -0.250 | -0.125 |
| Inj_Speed*Screw_Speed         | -2.750 | -1.375 |
| Flow_Rate*Inj_Speed*Melt_Temp | -2.500 | -1.250 |
| Flow_Rate*Inj_Press*Melt_Temp | 7.500  | 3.750  |

S = \*      PRESS = \*

#### Analysis of Variance for Shrinkage (coded units)

| Source                        | DF | Seq SS  | Adj SS  | Adj MS  | F | P |
|-------------------------------|----|---------|---------|---------|---|---|
| Main Effects                  | 6  | 80.000  | 80.000  | 13.333  | * | * |
| Flow_Rate                     | 1  | 25.000  | 25.000  | 25.000  | * | * |
| Inj_Speed                     | 1  | 30.250  | 30.250  | 30.250  | * | * |
| Inj_Press                     | 1  | 6.250   | 6.250   | 6.250   | * | * |
| Melt_Temp                     | 1  | 2.250   | 2.250   | 2.250   | * | * |
| Viscosity                     | 1  | 4.000   | 4.000   | 4.000   | * | * |
| Screw_Speed                   | 1  | 12.250  | 12.250  | 12.250  | * | * |
| 2-Way Interactions            | 7  | 115.750 | 115.750 | 16.536  | * | * |
| Flow_Rate*Inj_Speed           | 1  | 16.000  | 16.000  | 16.000  | * | * |
| Flow_Rate*Inj_Press           | 1  | 0.000   | 0.000   | 0.000   | * | * |
| Flow_Rate*Melt_Temp           | 1  | 0.000   | 0.000   | 0.000   | * | * |
| Flow_Rate*Viscosity           | 1  | 20.250  | 20.250  | 20.250  | * | * |
| Flow_Rate*Screw_Speed         | 1  | 49.000  | 49.000  | 49.000  | * | * |
| Inj_Speed*Melt_Temp           | 1  | 0.250   | 0.250   | 0.250   | * | * |
| Inj_Speed*Screw_Speed         | 1  | 30.250  | 30.250  | 30.250  | * | * |
| 3-Way Interactions            | 2  | 250.000 | 250.000 | 125.000 | * | * |
| Flow_Rate*Inj_Speed*Melt_Temp | 1  | 25.000  | 25.000  | 25.000  | * | * |
| Flow_Rate*Inj_Press*Melt_Temp | 1  | 225.000 | 225.000 | 225.000 | * | * |
| Residual Error                | 0  | *       | *       | *       |   |   |
| Total                         | 15 | 445.750 |         |         |   |   |

#### Estimated Coefficients for Shrinkage using data in uncoded units

| Term                  | Coef       |
|-----------------------|------------|
| Constant              | -9918.88   |
| Flow_Rate             | 5128.87    |
| Inj_Speed             | 395.411    |
| Inj_Press             | -0.0625000 |
| Melt_Temp             | -31.8106   |
| Viscosity             | 125.542    |
| Screw_Speed           | 1017.67    |
| Flow_Rate*Inj_Speed   | 111.737    |
| Flow_Rate*Inj_Press   | -80.9859   |
| Flow_Rate*Melt_Temp   | -21.1268   |
| Flow_Rate*Viscosity   | -42.2535   |
| Flow_Rate*Screw_Speed | -16.4319   |

|                               |           |
|-------------------------------|-----------|
| Inj_Speed*Melt_Temp           | 1.41214   |
| Inj_Speed*Screw_Speed         | -43.0641  |
| Flow_Rate*Inj_Speed*Melt_Temp | -0.469484 |
| Flow_Rate*Inj_Press*Melt_Temp | 0.352113  |

## Effects Pareto for Shrinkage

Alias Structure

```

I + Flow_Rate*Inj_Speed*Inj_Press*Viscosity +
    Flow_Rate*Melt_Temp*Viscosity*Screw_Speed +
    Inj_Speed*Inj_Press*Melt_Temp*Screw_Speed
Flow_Rate + Inj_Speed*Inj_Press*Viscosity + Melt_Temp*Viscosity*Screw_Speed +
    Flow_Rate*Inj_Speed*Inj_Press*Melt_Temp*Screw_Speed
Inj_Speed + Flow_Rate*Inj_Press*Viscosity + Inj_Press*Melt_Temp*Screw_Speed +
    Flow_Rate*Inj_Speed*Melt_Temp*Viscosity*Screw_Speed
Inj_Press + Flow_Rate*Inj_Speed*Viscosity + Inj_Speed*Melt_Temp*Screw_Speed +
    Flow_Rate*Inj_Press*Melt_Temp*Viscosity*Screw_Speed
Melt_Temp + Flow_Rate*Viscosity*Screw_Speed + Inj_Speed*Inj_Press*Screw_Speed +
    Flow_Rate*Inj_Speed*Inj_Press*Melt_Temp*Viscosity
Viscosity + Flow_Rate*Inj_Speed*Inj_Press + Flow_Rate*Melt_Temp*Screw_Speed +
    Inj_Speed*Inj_Press*Melt_Temp*Viscosity*Screw_Speed
Screw_Speed + Flow_Rate*Melt_Temp*Viscosity + Inj_Speed*Inj_Press*Melt_Temp +
    Flow_Rate*Inj_Speed*Inj_Press*Viscosity*Screw_Speed
Flow_Rate*Inj_Speed + Inj_Press*Viscosity +
    Flow_Rate*Inj_Press*Melt_Temp*Screw_Speed +
    Inj_Speed*Melt_Temp*Viscosity*Screw_Speed
Flow_Rate*Inj_Press + Inj_Speed*Viscosity +
    Flow_Rate*Inj_Speed*Melt_Temp*Screw_Speed +
    Inj_Press*Melt_Temp*Viscosity*Screw_Speed
Flow_Rate*Melt_Temp + Viscosity*Screw_Speed +
    Flow_Rate*Inj_Speed*Inj_Press*Screw_Speed +
    Inj_Speed*Inj_Press*Melt_Temp*Viscosity
Flow_Rate*Viscosity + Inj_Speed*Inj_Press + Melt_Temp*Screw_Speed +
    Flow_Rate*Inj_Speed*Inj_Press*Melt_Temp*Viscosity*Screw_Speed
Flow_Rate*Screw_Speed + Melt_Temp*Viscosity +
    Flow_Rate*Inj_Speed*Inj_Press*Melt_Temp +
    Inj_Speed*Inj_Press*Viscosity*Screw_Speed
Inj_Speed*Melt_Temp + Inj_Press*Screw_Speed +
    Flow_Rate*Inj_Speed*Viscosity*Screw_Speed +
    Flow_Rate*Inj_Press*Melt_Temp*Viscosity
Inj_Speed*Screw_Speed + Inj_Press*Melt_Temp +
    Flow_Rate*Inj_Speed*Melt_Temp*Viscosity +
    Flow_Rate*Inj_Press*Viscosity*Screw_Speed
Flow_Rate*Inj_Speed*Melt_Temp + Flow_Rate*Inj_Press*Screw_Speed +
    Inj_Speed*Viscosity*Screw_Speed + Inj_Press*Melt_Temp*Viscosity
Flow_Rate*Inj_Speed*Screw_Speed + Flow_Rate*Inj_Press*Melt_Temp +
    Inj_Speed*Melt_Temp*Viscosity + Inj_Press*Viscosity*Screw_Speed

```

Alias Information for Terms in the Model.

Totally confounded terms were removed from the analysis.

```

I + Flow_Rate*Inj_Speed*Inj_Press*Viscosity +
    Flow_Rate*Melt_Temp*Viscosity*Screw_Speed +
    Inj_Speed*Inj_Press*Melt_Temp*Screw_Speed
Flow_Rate + Inj_Speed*Inj_Press*Viscosity + Melt_Temp*Viscosity*Screw_Speed +
    Flow_Rate*Inj_Speed*Inj_Press*Melt_Temp*Screw_Speed
Inj_Speed + Flow_Rate*Inj_Press*Viscosity + Inj_Press*Melt_Temp*Screw_Speed +
    Flow_Rate*Inj_Speed*Melt_Temp*Viscosity*Screw_Speed
Inj_Press + Flow_Rate*Inj_Speed*Viscosity + Inj_Speed*Melt_Temp*Screw_Speed +

```

```

Flow_Rate*Inj_Press*Melt_Temp*Viscosity*Screw_Speed
Melt_Temp + Flow_Rate*Viscosity*Screw_Speed + Inj_Speed*Inj_Press*Screw_Speed +
Flow_Rate*Inj_Speed*Inj_Press*Melt_Temp*Viscosity
Viscosity + Flow_Rate*Inj_Speed*Inj_Press + Flow_Rate*Melt_Temp*Screw_Speed +
Inj_Speed*Inj_Press*Melt_Temp*Viscosity*Screw_Speed
Screw_Speed + Flow_Rate*Melt_Temp*Viscosity + Inj_Speed*Inj_Press*Melt_Temp +
Flow_Rate*Inj_Speed*Inj_Press*Viscosity*Screw_Speed
Flow_Rate*Inj_Speed + Inj_Press*Viscosity +
Flow_Rate*Inj_Press*Melt_Temp*Screw_Speed +
Inj_Speed*Melt_Temp*Viscosity*Screw_Speed
Flow_Rate*Inj_Press + Inj_Speed*Viscosity +
Flow_Rate*Inj_Speed*Inj_Press*Melt_Temp*Screw_Speed +
Inj_Press*Melt_Temp*Viscosity*Screw_Speed
Flow_Rate*Melt_Temp + Viscosity*Screw_Speed +
Flow_Rate*Inj_Speed*Inj_Press*Screw_Speed +
Inj_Speed*Inj_Press*Melt_Temp*Viscosity
Flow_Rate*Viscosity + Inj_Speed*Inj_Press + Melt_Temp*Screw_Speed +
Flow_Rate*Inj_Speed*Inj_Press*Melt_Temp*Viscosity*Screw_Speed
Flow_Rate*Screw_Speed + Melt_Temp*Viscosity +
Flow_Rate*Inj_Speed*Inj_Press*Melt_Temp +
Inj_Speed*Inj_Press*Viscosity*Screw_Speed
Inj_Speed*Melt_Temp + Inj_Press*Screw_Speed +
Flow_Rate*Inj_Press*Melt_Temp*Viscosity +
Flow_Rate*Inj_Speed*Viscosity*Screw_Speed
Inj_Speed*Screw_Speed + Inj_Press*Melt_Temp +
Flow_Rate*Inj_Speed*Melt_Temp*Viscosity +
Flow_Rate*Inj_Press*Viscosity*Screw_Speed
Flow_Rate*Inj_Speed*Melt_Temp + Flow_Rate*Inj_Press*Screw_Speed +
Inj_Speed*Viscosity*Screw_Speed + Inj_Press*Melt_Temp*Viscosity
Flow_Rate*Inj_Press*Melt_Temp + Flow_Rate*Inj_Speed*Screw_Speed +
Inj_Speed*Melt_Temp*Viscosity + Inj_Press*Viscosity*Screw_Speed

```

## Factorial Fit: Shrinkage versus Flow\_Rate, Inj\_Speed, ...

Estimated Effects and Coefficients for Shrinkage (coded units)

| Term                          | Effect | Coef   |
|-------------------------------|--------|--------|
| Constant                      |        | 13.000 |
| Flow_Rate                     | -4.250 | -2.125 |
| Inj_Speed                     | -1.000 | -0.500 |
| Inj_Press                     | -3.000 | -1.500 |
| Melt_Temp                     | -2.500 | -1.250 |
| Viscosity                     | 0.750  | 0.375  |
| Screw_Speed                   | -0.000 | -0.000 |
| Flow_Rate*Inj_Speed           | 3.750  | 1.875  |
| Flow_Rate*Inj_Press           | -1.750 | -0.875 |
| Flow_Rate*Melt_Temp           | -1.750 | -0.875 |
| Flow_Rate*Viscosity           | -0.500 | -0.250 |
| Flow_Rate*Screw_Speed         | -1.750 | -0.875 |
| Inj_Speed*Melt_Temp           | 1.500  | 0.750  |
| Inj_Speed*Screw_Speed         | -4.500 | -2.250 |
| Flow_Rate*Inj_Speed*Melt_Temp | -0.750 | -0.375 |
| Flow_Rate*Inj_Press*Melt_Temp | 5.750  | 2.875  |

S = \* PRESS = \*

Analysis of Variance for Shrinkage (coded units)

| Source       | DF | Seq SS  | Adj SS  | Adj MS | F | P |
|--------------|----|---------|---------|--------|---|---|
| Main Effects | 6  | 139.500 | 139.500 | 23.250 | * | * |



|                               |    |         |         |         |   |   |
|-------------------------------|----|---------|---------|---------|---|---|
| Flow_Rate                     | 1  | 72.250  | 72.250  | 72.250  | * | * |
| Inj_Speed                     | 1  | 4.000   | 4.000   | 4.000   | * | * |
| Inj_Press                     | 1  | 36.000  | 36.000  | 36.000  | * | * |
| Melt_Temp                     | 1  | 25.000  | 25.000  | 25.000  | * | * |
| Viscosity                     | 1  | 2.250   | 2.250   | 2.250   | * | * |
| Screw_Speed                   | 1  | 0.000   | 0.000   | 0.000   | * | * |
| 2-Way Interactions            | 7  | 184.000 | 184.000 | 26.286  | * | * |
| Flow_Rate*Inj_Speed           | 1  | 56.250  | 56.250  | 56.250  | * | * |
| Flow_Rate*Inj_Press           | 1  | 12.250  | 12.250  | 12.250  | * | * |
| Flow_Rate*Melt_Temp           | 1  | 12.250  | 12.250  | 12.250  | * | * |
| Flow_Rate*Viscosity           | 1  | 1.000   | 1.000   | 1.000   | * | * |
| Flow_Rate*Screw_Speed         | 1  | 12.250  | 12.250  | 12.250  | * | * |
| Inj_Speed*Melt_Temp           | 1  | 9.000   | 9.000   | 9.000   | * | * |
| Inj_Speed*Screw_Speed         | 1  | 81.000  | 81.000  | 81.000  | * | * |
| 3-Way Interactions            | 2  | 134.500 | 134.500 | 67.250  | * | * |
| Flow_Rate*Inj_Speed*Melt_Temp | 1  | 2.250   | 2.250   | 2.250   | * | * |
| Flow_Rate*Inj_Press*Melt_Temp | 1  | 132.250 | 132.250 | 132.250 | * | * |
| Residual Error                | 0  | *       | *       | *       |   |   |
| Total                         | 15 | 458.000 |         |         |   |   |

Estimated Coefficients for Shrinkage using data in uncoded units

| Term                          | Coef      |
|-------------------------------|-----------|
| Constant                      | -11134.3  |
| Flow_Rate                     | 5102.58   |
| Inj_Speed                     | 443.261   |
| Inj_Press                     | 2.32999   |
| Melt_Temp                     | -7.88568  |
| Viscosity                     | 29.8427   |
| Screw_Speed                   | 778.418   |
| Flow_Rate*Inj_Speed           | 39.4366   |
| Flow_Rate*Inj_Press           | -62.9108  |
| Flow_Rate*Melt_Temp           | -21.9484  |
| Flow_Rate*Viscosity           | -9.38967  |
| Flow_Rate*Screw_Speed         | -8.21596  |
| Inj_Speed*Melt_Temp           | 0.455141  |
| Inj_Speed*Screw_Speed         | -33.4941  |
| Flow_Rate*Inj_Speed*Melt_Temp | -0.140845 |
| Flow_Rate*Inj_Press*Melt_Temp | 0.269953  |

## Effects Pareto for Shrinkage

Alias Structure

```

I + Flow_Rate*Inj_Speed*Inj_Press*Viscosity +
    Flow_Rate*Melt_Temp*Viscosity*Screw_Speed +
    Inj_Speed*Inj_Press*Melt_Temp*Screw_Speed
Flow_Rate + Inj_Speed*Inj_Press*Viscosity + Melt_Temp*Viscosity*Screw_Speed +
    Flow_Rate*Inj_Speed*Inj_Press*Melt_Temp*Screw_Speed
Inj_Speed + Flow_Rate*Inj_Press*Viscosity + Inj_Press*Melt_Temp*Screw_Speed +
    Flow_Rate*Inj_Speed*Melt_Temp*Viscosity*Screw_Speed
Inj_Press + Flow_Rate*Inj_Speed*Viscosity + Inj_Speed*Melt_Temp*Screw_Speed +
    Flow_Rate*Inj_Press*Melt_Temp*Viscosity*Screw_Speed
Melt_Temp + Flow_Rate*Viscosity*Screw_Speed + Inj_Speed*Inj_Press*Screw_Speed +
    Flow_Rate*Inj_Speed*Inj_Press*Melt_Temp*Viscosity
Viscosity + Flow_Rate*Inj_Speed*Inj_Press + Flow_Rate*Melt_Temp*Screw_Speed +
    Inj_Speed*Inj_Press*Melt_Temp*Viscosity*Screw_Speed
Screw_Speed + Flow_Rate*Melt_Temp*Viscosity + Inj_Speed*Inj_Press*Melt_Temp +
    Flow_Rate*Inj_Speed*Inj_Press*Viscosity*Screw_Speed
Flow_Rate*Inj_Speed + Inj_Press*Viscosity +

```

```

Flow_Rate*Inj_Press*Melt_Temp*Screw_Speed +
Inj_Speed*Melt_Temp*Viscosity*Screw_Speed
Flow_Rate*Inj_Press + Inj_Speed*Viscosity +
Flow_Rate*Inj_Speed*Melt_Temp*Screw_Speed +
Inj_Press*Melt_Temp*Viscosity*Screw_Speed
Flow_Rate*Melt_Temp + Viscosity*Screw_Speed +
Flow_Rate*Inj_Speed*Inj_Press*Screw_Speed +
Inj_Speed*Inj_Press*Melt_Temp*Viscosity
Flow_Rate*Viscosity + Inj_Speed*Inj_Press + Melt_Temp*Screw_Speed +
Flow_Rate*Inj_Speed*Inj_Press*Melt_Temp*Viscosity*Screw_Speed
Flow_Rate*Screw_Speed + Melt_Temp*Viscosity +
Flow_Rate*Inj_Speed*Inj_Press*Melt_Temp +
Inj_Speed*Inj_Press*Viscosity*Screw_Speed
Inj_Speed*Melt_Temp + Inj_Press*Screw_Speed +
Flow_Rate*Inj_Speed*Viscosity*Screw_Speed +
Flow_Rate*Inj_Press*Melt_Temp*Viscosity
Inj_Speed*Screw_Speed + Inj_Press*Melt_Temp +
Flow_Rate*Inj_Speed*Melt_Temp*Viscosity +
Flow_Rate*Inj_Press*Viscosity*Screw_Speed
Flow_Rate*Inj_Speed*Melt_Temp + Flow_Rate*Inj_Press*Screw_Speed +
Inj_Speed*Viscosity*Screw_Speed + Inj_Press*Melt_Temp*Viscosity
Flow_Rate*Inj_Speed*Screw_Speed + Flow_Rate*Inj_Press*Melt_Temp +
Inj_Speed*Melt_Temp*Viscosity + Inj_Press*Viscosity*Screw_Speed

```

Alias Information for Terms in the Model.  
Totally confounded terms were removed from the analysis.

```

I + Flow_Rate*Inj_Speed*Inj_Press*Viscosity +
Flow_Rate*Melt_Temp*Viscosity*Screw_Speed +
Inj_Speed*Inj_Press*Melt_Temp*Screw_Speed
Flow_Rate + Inj_Speed*Inj_Press*Viscosity + Melt_Temp*Viscosity*Screw_Speed +
Flow_Rate*Inj_Speed*Inj_Press*Melt_Temp*Screw_Speed
Inj_Speed + Flow_Rate*Inj_Press*Viscosity + Inj_Press*Melt_Temp*Screw_Speed +
Flow_Rate*Inj_Speed*Melt_Temp*Viscosity*Screw_Speed
Inj_Press + Flow_Rate*Inj_Speed*Viscosity + Inj_Speed*Melt_Temp*Screw_Speed +
Flow_Rate*Inj_Press*Melt_Temp*Viscosity*Screw_Speed
Melt_Temp + Flow_Rate*Viscosity*Screw_Speed + Inj_Speed*Inj_Press*Screw_Speed +
Flow_Rate*Inj_Speed*Inj_Press*Melt_Temp*Viscosity
Viscosity + Flow_Rate*Inj_Speed*Inj_Press + Flow_Rate*Melt_Temp*Screw_Speed +
Inj_Speed*Inj_Press*Melt_Temp*Viscosity*Screw_Speed
Screw_Speed + Flow_Rate*Melt_Temp*Viscosity + Inj_Speed*Inj_Press*Melt_Temp +
Flow_Rate*Inj_Speed*Inj_Press*Viscosity*Screw_Speed
Flow_Rate*Inj_Speed + Inj_Press*Viscosity +
Flow_Rate*Inj_Press*Melt_Temp*Screw_Speed +
Inj_Speed*Melt_Temp*Viscosity*Screw_Speed
Flow_Rate*Inj_Press + Inj_Speed*Viscosity +
Flow_Rate*Inj_Speed*Melt_Temp*Screw_Speed +
Inj_Press*Melt_Temp*Viscosity*Screw_Speed
Flow_Rate*Melt_Temp + Viscosity*Screw_Speed +
Flow_Rate*Inj_Speed*Inj_Press*Screw_Speed +
Inj_Speed*Inj_Press*Melt_Temp*Viscosity
Flow_Rate*Viscosity + Inj_Speed*Inj_Press + Melt_Temp*Screw_Speed +
Flow_Rate*Inj_Speed*Inj_Press*Melt_Temp*Viscosity*Screw_Speed
Flow_Rate*Screw_Speed + Melt_Temp*Viscosity +
Flow_Rate*Inj_Speed*Inj_Press*Melt_Temp +
Inj_Speed*Inj_Press*Viscosity*Screw_Speed
Inj_Speed*Melt_Temp + Inj_Press*Screw_Speed +
Flow_Rate*Inj_Press*Melt_Temp*Viscosity +
Flow_Rate*Inj_Speed*Viscosity*Screw_Speed
Inj_Speed*Screw_Speed + Inj_Press*Melt_Temp +
Flow_Rate*Inj_Speed*Melt_Temp*Viscosity +
Flow_Rate*Inj_Press*Viscosity*Screw_Speed

```

$\text{Flow\_Rate} \times \text{Inj\_Speed} \times \text{Melt\_Temp} + \text{Flow\_Rate} \times \text{Inj\_Press} \times \text{Screw\_Speed} +$   
 $\text{Inj\_Speed} \times \text{Viscosity} \times \text{Screw\_Speed} + \text{Inj\_Press} \times \text{Melt\_Temp} \times \text{Viscosity}$   
 $\text{Flow\_Rate} \times \text{Inj\_Press} \times \text{Melt\_Temp} + \text{Flow\_Rate} \times \text{Inj\_Speed} \times \text{Screw\_Speed} +$   
 $\text{Inj\_Speed} \times \text{Melt\_Temp} \times \text{Viscosity} + \text{Inj\_Press} \times \text{Viscosity} \times \text{Screw\_Speed}$

## Factorial Fit: Shrinkage versus Flow\_Rate, Inj\_Speed, ...

Estimated Effects and Coefficients for Shrinkage (coded units)

| Term                          | Effect | Coef   |
|-------------------------------|--------|--------|
| Constant                      |        | 13.750 |
| Flow_Rate                     | -2.750 | -1.375 |
| Inj_Speed                     | -2.500 | -1.250 |
| Inj_Press                     | -1.500 | -0.750 |
| Melt_Temp                     | -1.000 | -0.500 |
| Viscosity                     | -0.750 | -0.375 |
| Screw_Speed                   | -1.500 | -0.750 |
| Flow_Rate*Inj_Speed           | 2.250  | 1.125  |
| Flow_Rate*Inj_Press           | -0.250 | -0.125 |
| Flow_Rate*Melt_Temp           | -0.250 | -0.125 |
| Flow_Rate*Viscosity           | -2.000 | -1.000 |
| Flow_Rate*Screw_Speed         | -3.250 | -1.625 |
| Inj_Speed*Melt_Temp           | -0.000 | -0.000 |
| Inj_Speed*Screw_Speed         | -3.000 | -1.500 |
| Flow_Rate*Inj_Speed*Melt_Temp | -2.250 | -1.125 |
| Flow_Rate*Inj_Press*Melt_Temp | 7.250  | 3.625  |

S = \* PRESS = \*

Analysis of Variance for Shrinkage (coded units)

| Source                        | DF | Seq SS  | Adj SS  | Adj MS  | F | P |
|-------------------------------|----|---------|---------|---------|---|---|
| Main Effects                  | 6  | 79.500  | 79.500  | 13.250  | * | * |
| Flow_Rate                     | 1  | 30.250  | 30.250  | 30.250  | * | * |
| Inj_Speed                     | 1  | 25.000  | 25.000  | 25.000  | * | * |
| Inj_Press                     | 1  | 9.000   | 9.000   | 9.000   | * | * |
| Melt_Temp                     | 1  | 4.000   | 4.000   | 4.000   | * | * |
| Viscosity                     | 1  | 2.250   | 2.250   | 2.250   | * | * |
| Screw_Speed                   | 1  | 9.000   | 9.000   | 9.000   | * | * |
| 2-Way Interactions            | 7  | 115.000 | 115.000 | 16.429  | * | * |
| Flow_Rate*Inj_Speed           | 1  | 20.250  | 20.250  | 20.250  | * | * |
| Flow_Rate*Inj_Press           | 1  | 0.250   | 0.250   | 0.250   | * | * |
| Flow_Rate*Melt_Temp           | 1  | 0.250   | 0.250   | 0.250   | * | * |
| Flow_Rate*Viscosity           | 1  | 16.000  | 16.000  | 16.000  | * | * |
| Flow_Rate*Screw_Speed         | 1  | 42.250  | 42.250  | 42.250  | * | * |
| Inj_Speed*Melt_Temp           | 1  | 0.000   | 0.000   | 0.000   | * | * |
| Inj_Speed*Screw_Speed         | 1  | 36.000  | 36.000  | 36.000  | * | * |
| 3-Way Interactions            | 2  | 230.500 | 230.500 | 115.250 | * | * |
| Flow_Rate*Inj_Speed*Melt_Temp | 1  | 20.250  | 20.250  | 20.250  | * | * |
| Flow_Rate*Inj_Press*Melt_Temp | 1  | 210.250 | 210.250 | 210.250 | * | * |
| Residual Error                | 0  | *       | *       | *       |   |   |
| Total                         | 15 | 425.000 |         |         |   |   |

Estimated Coefficients for Shrinkage using data in uncoded units

| Term      | Coef     |
|-----------|----------|
| Constant  | -10092.5 |
| Flow_Rate | 5125.12  |
| Inj_Speed | 402.247  |

|                               |           |
|-------------------------------|-----------|
| Inj_Press                     | 0.279284  |
| Melt_Temp                     | -28.3927  |
| Viscosity                     | 111.871   |
| Screw_Speed                   | 983.488   |
| Flow_Rate*Inj_Speed           | 101.408   |
| Flow_Rate*Inj_Press           | -78.4038  |
| Flow_Rate*Melt_Temp           | -21.2441  |
| Flow_Rate*Viscosity           | -37.5587  |
| Flow_Rate*Screw_Speed         | -15.2582  |
| Inj_Speed*Melt_Temp           | 1.27542   |
| Inj_Speed*Screw_Speed         | -41.6969  |
| Flow_Rate*Inj_Speed*Melt_Temp | -0.422535 |
| Flow_Rate*Inj_Press*Melt_Temp | 0.340376  |

## Effects Pareto for Shrinkage

Alias Structure

```

I + Flow_Rate*Inj_Speed*Inj_Press*Viscosity +
    Flow_Rate*Melt_Temp*Viscosity*Screw_Speed +
    Inj_Speed*Inj_Press*Melt_Temp*Screw_Speed
Flow_Rate + Inj_Speed*Inj_Press*Viscosity + Melt_Temp*Viscosity*Screw_Speed +
    Flow_Rate*Inj_Speed*Inj_Press*Melt_Temp*Screw_Speed
Inj_Speed + Flow_Rate*Inj_Press*Viscosity + Inj_Press*Melt_Temp*Screw_Speed +
    Flow_Rate*Inj_Speed*Melt_Temp*Viscosity*Screw_Speed
Inj_Press + Flow_Rate*Inj_Speed*Viscosity + Inj_Speed*Melt_Temp*Screw_Speed +
    Flow_Rate*Inj_Press*Melt_Temp*Viscosity*Screw_Speed
Melt_Temp + Flow_Rate*Viscosity*Screw_Speed + Inj_Speed*Inj_Press*Screw_Speed +
    Flow_Rate*Inj_Speed*Inj_Press*Melt_Temp*Viscosity
Viscosity + Flow_Rate*Inj_Speed*Inj_Press + Flow_Rate*Melt_Temp*Screw_Speed +
    Inj_Speed*Inj_Press*Melt_Temp*Viscosity*Screw_Speed
Screw_Speed + Flow_Rate*Melt_Temp*Viscosity + Inj_Speed*Inj_Press*Melt_Temp +
    Flow_Rate*Inj_Speed*Inj_Press*Viscosity*Screw_Speed
Flow_Rate*Inj_Speed + Inj_Press*Viscosity +
    Flow_Rate*Inj_Press*Melt_Temp*Screw_Speed +
    Inj_Speed*Melt_Temp*Viscosity*Screw_Speed
Flow_Rate*Inj_Press + Inj_Speed*Viscosity +
    Flow_Rate*Inj_Speed*Melt_Temp*Screw_Speed +
    Inj_Press*Melt_Temp*Viscosity*Screw_Speed
Flow_Rate*Melt_Temp + Viscosity*Screw_Speed +
    Flow_Rate*Inj_Speed*Inj_Press*Screw_Speed +
    Inj_Speed*Inj_Press*Melt_Temp*Viscosity
Flow_Rate*Viscosity + Inj_Speed*Inj_Press + Melt_Temp*Screw_Speed +
    Flow_Rate*Inj_Speed*Inj_Press*Melt_Temp*Viscosity*Screw_Speed
Flow_Rate*Screw_Speed + Melt_Temp*Viscosity +
    Flow_Rate*Inj_Speed*Inj_Press*Melt_Temp +
    Inj_Speed*Inj_Press*Viscosity*Screw_Speed
Inj_Speed*Melt_Temp + Inj_Press*Screw_Speed +
    Flow_Rate*Inj_Speed*Viscosity*Screw_Speed +
    Flow_Rate*Inj_Press*Melt_Temp*Viscosity
Inj_Speed*Screw_Speed + Inj_Press*Melt_Temp +
    Flow_Rate*Inj_Speed*Melt_Temp*Viscosity +
    Flow_Rate*Inj_Press*Viscosity*Screw_Speed
Flow_Rate*Inj_Speed*Melt_Temp + Flow_Rate*Inj_Press*Screw_Speed +
    Inj_Speed*Viscosity*Screw_Speed + Inj_Press*Melt_Temp*Viscosity
Flow_Rate*Inj_Speed*Screw_Speed + Flow_Rate*Inj_Press*Melt_Temp +
    Inj_Speed*Melt_Temp*Viscosity + Inj_Press*Viscosity*Screw_Speed

```

Alias Information for Terms in the Model.

Totally confounded terms were removed from the analysis.

$$\begin{aligned}
& I + \text{Flow\_Rate} * \text{Inj\_Speed} * \text{Inj\_Press} * \text{Viscosity} + \\
& \quad \text{Flow\_Rate} * \text{Melt\_Temp} * \text{Viscosity} * \text{Screw\_Speed} + \\
& \quad \text{Inj\_Speed} * \text{Inj\_Press} * \text{Melt\_Temp} * \text{Screw\_Speed} \\
& \text{Flow\_Rate} + \text{Inj\_Speed} * \text{Inj\_Press} * \text{Viscosity} + \text{Melt\_Temp} * \text{Viscosity} * \text{Screw\_Speed} + \\
& \quad \text{Flow\_Rate} * \text{Inj\_Speed} * \text{Inj\_Press} * \text{Melt\_Temp} * \text{Screw\_Speed} \\
& \text{Inj\_Speed} + \text{Flow\_Rate} * \text{Inj\_Press} * \text{Viscosity} + \text{Inj\_Press} * \text{Melt\_Temp} * \text{Screw\_Speed} + \\
& \quad \text{Flow\_Rate} * \text{Inj\_Speed} * \text{Melt\_Temp} * \text{Viscosity} * \text{Screw\_Speed} \\
& \text{Inj\_Press} + \text{Flow\_Rate} * \text{Inj\_Speed} * \text{Viscosity} + \text{Inj\_Speed} * \text{Melt\_Temp} * \text{Screw\_Speed} + \\
& \quad \text{Flow\_Rate} * \text{Inj\_Press} * \text{Melt\_Temp} * \text{Viscosity} * \text{Screw\_Speed} \\
& \text{Melt\_Temp} + \text{Flow\_Rate} * \text{Viscosity} * \text{Screw\_Speed} + \text{Inj\_Speed} * \text{Inj\_Press} * \text{Screw\_Speed} + \\
& \quad \text{Flow\_Rate} * \text{Inj\_Speed} * \text{Inj\_Press} * \text{Melt\_Temp} * \text{Viscosity} \\
& \text{Viscosity} + \text{Flow\_Rate} * \text{Inj\_Speed} * \text{Inj\_Press} + \text{Flow\_Rate} * \text{Melt\_Temp} * \text{Screw\_Speed} + \\
& \quad \text{Inj\_Speed} * \text{Inj\_Press} * \text{Melt\_Temp} * \text{Viscosity} * \text{Screw\_Speed} \\
& \text{Screw\_Speed} + \text{Flow\_Rate} * \text{Melt\_Temp} * \text{Viscosity} + \text{Inj\_Speed} * \text{Inj\_Press} * \text{Melt\_Temp} + \\
& \quad \text{Flow\_Rate} * \text{Inj\_Speed} * \text{Inj\_Press} * \text{Viscosity} * \text{Screw\_Speed} \\
& \text{Flow\_Rate} * \text{Inj\_Speed} + \text{Inj\_Press} * \text{Viscosity} + \\
& \quad \text{Flow\_Rate} * \text{Inj\_Press} * \text{Melt\_Temp} * \text{Screw\_Speed} + \\
& \quad \text{Inj\_Speed} * \text{Melt\_Temp} * \text{Viscosity} * \text{Screw\_Speed} \\
& \text{Flow\_Rate} * \text{Inj\_Press} + \text{Inj\_Speed} * \text{Viscosity} + \\
& \quad \text{Flow\_Rate} * \text{Inj\_Speed} * \text{Melt\_Temp} * \text{Screw\_Speed} + \\
& \quad \text{Inj\_Press} * \text{Melt\_Temp} * \text{Viscosity} * \text{Screw\_Speed} \\
& \text{Flow\_Rate} * \text{Melt\_Temp} + \text{Viscosity} * \text{Screw\_Speed} + \\
& \quad \text{Flow\_Rate} * \text{Inj\_Speed} * \text{Inj\_Press} * \text{Screw\_Speed} + \\
& \quad \text{Inj\_Speed} * \text{Inj\_Press} * \text{Melt\_Temp} * \text{Viscosity} \\
& \text{Flow\_Rate} * \text{Viscosity} + \text{Inj\_Speed} * \text{Inj\_Press} + \text{Melt\_Temp} * \text{Screw\_Speed} + \\
& \quad \text{Flow\_Rate} * \text{Inj\_Speed} * \text{Inj\_Press} * \text{Melt\_Temp} * \text{Viscosity} * \text{Screw\_Speed} \\
& \text{Flow\_Rate} * \text{Screw\_Speed} + \text{Melt\_Temp} * \text{Viscosity} + \\
& \quad \text{Flow\_Rate} * \text{Inj\_Speed} * \text{Inj\_Press} * \text{Melt\_Temp} + \\
& \quad \text{Inj\_Speed} * \text{Inj\_Press} * \text{Viscosity} * \text{Screw\_Speed} \\
& \text{Inj\_Speed} * \text{Melt\_Temp} + \text{Inj\_Press} * \text{Screw\_Speed} + \\
& \quad \text{Flow\_Rate} * \text{Inj\_Press} * \text{Melt\_Temp} * \text{Viscosity} + \\
& \quad \text{Flow\_Rate} * \text{Inj\_Speed} * \text{Viscosity} * \text{Screw\_Speed} \\
& \text{Inj\_Speed} * \text{Screw\_Speed} + \text{Inj\_Press} * \text{Melt\_Temp} + \\
& \quad \text{Flow\_Rate} * \text{Inj\_Speed} * \text{Melt\_Temp} * \text{Viscosity} + \\
& \quad \text{Flow\_Rate} * \text{Inj\_Press} * \text{Viscosity} * \text{Screw\_Speed} \\
& \text{Flow\_Rate} * \text{Inj\_Speed} * \text{Melt\_Temp} + \text{Flow\_Rate} * \text{Inj\_Press} * \text{Screw\_Speed} + \\
& \quad \text{Inj\_Speed} * \text{Viscosity} * \text{Screw\_Speed} + \text{Inj\_Press} * \text{Melt\_Temp} * \text{Viscosity} \\
& \text{Flow\_Rate} * \text{Inj\_Press} * \text{Melt\_Temp} + \text{Flow\_Rate} * \text{Inj\_Speed} * \text{Screw\_Speed} + \\
& \quad \text{Inj\_Speed} * \text{Melt\_Temp} * \text{Viscosity} + \text{Inj\_Press} * \text{Viscosity} * \text{Screw\_Speed}
\end{aligned}$$

## Factorial Fit: Shrinkage versus Flow\_Rate, Inj\_Speed, ...

Estimated Effects and Coefficients for Shrinkage (coded units)

| Term                          | Effect | Coef   |
|-------------------------------|--------|--------|
| Constant                      |        | 13.250 |
| Flow_Rate                     | -1.250 | -0.625 |
| Inj_Speed                     | -4.000 | -2.000 |
| Inj_Press                     | -0.000 | -0.000 |
| Melt_Temp                     | -2.000 | -1.000 |
| Viscosity                     | -2.250 | -1.125 |
| Screw_Speed                   | -0.500 | -0.250 |
| Flow_Rate*Inj_Speed           | 3.250  | 1.625  |
| Flow_Rate*Inj_Press           | -1.250 | -0.625 |
| Flow_Rate*Melt_Temp           | 1.250  | 0.625  |
| Flow_Rate*Viscosity           | -1.000 | -0.500 |
| Flow_Rate*Screw_Speed         | -4.750 | -2.375 |
| Inj_Speed*Melt_Temp           | -1.500 | -0.750 |
| Inj_Speed*Screw_Speed         | -1.500 | -0.750 |
| Flow_Rate*Inj_Speed*Melt_Temp | -1.250 | -0.625 |
| Flow_Rate*Inj_Press*Melt_Temp | 6.250  | 3.125  |

S = \* PRESS = \*

#### Analysis of Variance for Shrinkage (coded units)

| Source                        | DF | Seq SS  | Adj SS  | Adj MS  | F | P |
|-------------------------------|----|---------|---------|---------|---|---|
| Main Effects                  | 6  | 107.500 | 107.500 | 17.917  | * | * |
| Flow_Rate                     | 1  | 6.250   | 6.250   | 6.250   | * | * |
| Inj_Speed                     | 1  | 64.000  | 64.000  | 64.000  | * | * |
| Inj_Press                     | 1  | 0.000   | 0.000   | 0.000   | * | * |
| Melt_Temp                     | 1  | 16.000  | 16.000  | 16.000  | * | * |
| Viscosity                     | 1  | 20.250  | 20.250  | 20.250  | * | * |
| Screw_Speed                   | 1  | 1.000   | 1.000   | 1.000   | * | * |
| 2-Way Interactions            | 7  | 167.000 | 167.000 | 23.857  | * | * |
| Flow_Rate*Inj_Speed           | 1  | 42.250  | 42.250  | 42.250  | * | * |
| Flow_Rate*Inj_Press           | 1  | 6.250   | 6.250   | 6.250   | * | * |
| Flow_Rate*Melt_Temp           | 1  | 6.250   | 6.250   | 6.250   | * | * |
| Flow_Rate*Viscosity           | 1  | 4.000   | 4.000   | 4.000   | * | * |
| Flow_Rate*Screw_Speed         | 1  | 90.250  | 90.250  | 90.250  | * | * |
| Inj_Speed*Melt_Temp           | 1  | 9.000   | 9.000   | 9.000   | * | * |
| Inj_Speed*Screw_Speed         | 1  | 9.000   | 9.000   | 9.000   | * | * |
| 3-Way Interactions            | 2  | 162.500 | 162.500 | 81.250  | * | * |
| Flow_Rate*Inj_Speed*Melt_Temp | 1  | 6.250   | 6.250   | 6.250   | * | * |
| Flow_Rate*Inj_Press*Melt_Temp | 1  | 156.250 | 156.250 | 156.250 | * | * |
| Residual Error                | 0  | *       | *       | *       |   |   |
| Total                         | 15 | 437.000 |         |         |   |   |

#### Estimated Coefficients for Shrinkage using data in uncoded units

| Term                          | Coef      |
|-------------------------------|-----------|
| Constant                      | -10667.1  |
| Flow_Rate                     | 5051.41   |
| Inj_Speed                     | 432.089   |
| Inj_Press                     | 1.77142   |
| Melt_Temp                     | -17.1392  |
| Viscosity                     | 52.1854   |
| Screw_Speed                   | 870.953   |
| Flow_Rate*Inj_Speed           | 60.0939   |
| Flow_Rate*Inj_Press           | -68.0751  |
| Flow_Rate*Melt_Temp           | -20.5399  |
| Flow_Rate*Viscosity           | -18.7793  |
| Flow_Rate*Screw_Speed         | -22.3005  |
| Inj_Speed*Melt_Temp           | 0.678568  |
| Inj_Speed*Screw_Speed         | -35.7284  |
| Flow_Rate*Inj_Speed*Melt_Temp | -0.234742 |
| Flow_Rate*Inj_Press*Melt_Temp | 0.293427  |

### Effects Pareto for Shrinkage

#### Alias Structure

```

I + Flow_Rate*Inj_Speed*Inj_Press*Viscosity +
    Flow_Rate*Melt_Temp*Viscosity*Screw_Speed +
    Inj_Speed*Inj_Press*Melt_Temp*Screw_Speed
Flow_Rate + Inj_Speed*Inj_Press*Viscosity + Melt_Temp*Viscosity*Screw_Speed +
    Flow_Rate*Inj_Speed*Inj_Press*Melt_Temp*Screw_Speed
Inj_Speed + Flow_Rate*Inj_Press*Viscosity + Inj_Press*Melt_Temp*Screw_Speed +
    Flow_Rate*Inj_Speed*Melt_Temp*Viscosity*Screw_Speed

```



$\text{Flow\_Rate} \times \text{Screw\_Speed} + \text{Melt\_Temp} \times \text{Viscosity} +$   
 $\text{Flow\_Rate} \times \text{Inj\_Speed} \times \text{Inj\_Press} \times \text{Melt\_Temp} +$   
 $\text{Inj\_Speed} \times \text{Inj\_Press} \times \text{Viscosity} \times \text{Screw\_Speed}$   
 $\text{Inj\_Speed} \times \text{Melt\_Temp} + \text{Inj\_Press} \times \text{Screw\_Speed} +$   
 $\text{Flow\_Rate} \times \text{Inj\_Press} \times \text{Melt\_Temp} \times \text{Viscosity} +$   
 $\text{Flow\_Rate} \times \text{Inj\_Speed} \times \text{Viscosity} \times \text{Screw\_Speed}$   
 $\text{Inj\_Speed} \times \text{Screw\_Speed} + \text{Inj\_Press} \times \text{Melt\_Temp} +$   
 $\text{Flow\_Rate} \times \text{Inj\_Speed} \times \text{Melt\_Temp} \times \text{Viscosity} +$   
 $\text{Flow\_Rate} \times \text{Inj\_Press} \times \text{Viscosity} \times \text{Screw\_Speed}$   
 $\text{Flow\_Rate} \times \text{Inj\_Speed} \times \text{Melt\_Temp} + \text{Flow\_Rate} \times \text{Inj\_Press} \times \text{Screw\_Speed} +$   
 $\text{Inj\_Speed} \times \text{Viscosity} \times \text{Screw\_Speed} + \text{Inj\_Press} \times \text{Melt\_Temp} \times \text{Viscosity}$   
 $\text{Flow\_Rate} \times \text{Inj\_Press} \times \text{Melt\_Temp} + \text{Flow\_Rate} \times \text{Inj\_Speed} \times \text{Screw\_Speed} +$   
 $\text{Inj\_Speed} \times \text{Melt\_Temp} \times \text{Viscosity} + \text{Inj\_Press} \times \text{Viscosity} \times \text{Screw\_Speed}$

## Factorial Fit: Shrinkage versus Flow\_Rate, Inj\_Speed, ...

Estimated Effects and Coefficients for Shrinkage (coded units)

| Term                          | Effect | Coef   |
|-------------------------------|--------|--------|
| Constant                      |        | 12.438 |
| Flow_Rate                     | 0.375  | 0.188  |
| Inj_Speed                     | -2.375 | -1.187 |
| Inj_Press                     | -1.625 | -0.813 |
| Melt_Temp                     | -0.375 | -0.188 |
| Viscosity                     | -3.875 | -1.938 |
| Screw_Speed                   | -2.125 | -1.062 |
| Flow_Rate*Inj_Speed           | 1.625  | 0.813  |
| Flow_Rate*Inj_Press           | 0.375  | 0.187  |
| Flow_Rate*Melt_Temp           | -0.375 | -0.188 |
| Flow_Rate*Viscosity           | 0.625  | 0.312  |
| Flow_Rate*Screw_Speed         | -3.125 | -1.563 |
| Inj_Speed*Melt_Temp           | -3.125 | -1.562 |
| Inj_Speed*Screw_Speed         | 0.125  | 0.063  |
| Flow_Rate*Inj_Speed*Melt_Temp | 0.375  | 0.188  |
| Flow_Rate*Inj_Press*Melt_Temp | 4.625  | 2.313  |

S = \* PRESS = \*

Analysis of Variance for Shrinkage (coded units)

| Source                        | DF | Seq SS  | Adj SS  | Adj MS  | F | P |
|-------------------------------|----|---------|---------|---------|---|---|
| Main Effects                  | 6  | 112.375 | 112.375 | 18.7292 | * | * |
| Flow_Rate                     | 1  | 0.563   | 0.563   | 0.5625  | * | * |
| Inj_Speed                     | 1  | 22.562  | 22.562  | 22.5625 | * | * |
| Inj_Press                     | 1  | 10.563  | 10.563  | 10.5625 | * | * |
| Melt_Temp                     | 1  | 0.563   | 0.563   | 0.5625  | * | * |
| Viscosity                     | 1  | 60.063  | 60.063  | 60.0625 | * | * |
| Screw_Speed                   | 1  | 18.062  | 18.062  | 18.0625 | * | * |
| 2-Way Interactions            | 7  | 91.437  | 91.437  | 13.0625 | * | * |
| Flow_Rate*Inj_Speed           | 1  | 10.562  | 10.563  | 10.5625 | * | * |
| Flow_Rate*Inj_Press           | 1  | 0.562   | 0.562   | 0.5625  | * | * |
| Flow_Rate*Melt_Temp           | 1  | 0.563   | 0.563   | 0.5625  | * | * |
| Flow_Rate*Viscosity           | 1  | 1.562   | 1.562   | 1.5625  | * | * |
| Flow_Rate*Screw_Speed         | 1  | 39.062  | 39.063  | 39.0625 | * | * |
| Inj_Speed*Melt_Temp           | 1  | 39.062  | 39.062  | 39.0625 | * | * |
| Inj_Speed*Screw_Speed         | 1  | 0.063   | 0.063   | 0.0625  | * | * |
| 3-Way Interactions            | 2  | 86.125  | 86.125  | 43.0625 | * | * |
| Flow_Rate*Inj_Speed*Melt_Temp | 1  | 0.563   | 0.563   | 0.5625  | * | * |
| Flow_Rate*Inj_Press*Melt_Temp | 1  | 85.563  | 85.563  | 85.5625 | * | * |
| Residual Error                | 0  | *       | *       | *       |   |   |



Total 15 289.937

Estimated Coefficients for Shrinkage using data in uncoded units

| Term                          | Coef      |
|-------------------------------|-----------|
| Constant                      | -11925.9  |
| Flow_Rate                     | 5042.25   |
| Inj_Speed                     | 498.844   |
| Inj_Press                     | -0.612676 |
| Melt_Temp                     | 6.70176   |
| Viscosity                     | -43.1784  |
| Screw_Speed                   | 632.543   |
| Flow_Rate*Inj_Speed           | -13.1455  |
| Flow_Rate*Inj_Press           | -49.7653  |
| Flow_Rate*Melt_Temp           | -21.3028  |
| Flow_Rate*Viscosity           | 11.7371   |
| Flow_Rate*Screw_Speed         | -14.6714  |
| Inj_Speed*Melt_Temp           | -0.275070 |
| Inj_Speed*Screw_Speed         | -26.1920  |
| Flow_Rate*Inj_Speed*Melt_Temp | 0.0704225 |
| Flow_Rate*Inj_Press*Melt_Temp | 0.217136  |

## Effects Pareto for Shrinkage

Alias Structure

I + Flow\_Rate\*Inj\_Speed\*Inj\_Press\*Viscosity +  
Flow\_Rate\*Melt\_Temp\*Viscosity\*Screw\_Speed +  
Inj\_Speed\*Inj\_Press\*Melt\_Temp\*Screw\_Speed  
Flow\_Rate + Inj\_Speed\*Inj\_Press\*Viscosity + Melt\_Temp\*Viscosity\*Screw\_Speed +  
Flow\_Rate\*Inj\_Speed\*Inj\_Press\*Melt\_Temp\*Screw\_Speed  
Inj\_Speed + Flow\_Rate\*Inj\_Press\*Viscosity + Inj\_Press\*Melt\_Temp\*Screw\_Speed +  
Flow\_Rate\*Inj\_Speed\*Melt\_Temp\*Viscosity\*Screw\_Speed  
Inj\_Press + Flow\_Rate\*Inj\_Speed\*Viscosity + Inj\_Speed\*Melt\_Temp\*Screw\_Speed +  
Flow\_Rate\*Inj\_Press\*Melt\_Temp\*Viscosity\*Screw\_Speed  
Melt\_Temp + Flow\_Rate\*Viscosity\*Screw\_Speed + Inj\_Speed\*Inj\_Press\*Screw\_Speed +  
Flow\_Rate\*Inj\_Speed\*Inj\_Press\*Melt\_Temp\*Viscosity  
Viscosity + Flow\_Rate\*Inj\_Speed\*Inj\_Press + Flow\_Rate\*Melt\_Temp\*Screw\_Speed +  
Inj\_Speed\*Inj\_Press\*Melt\_Temp\*Viscosity\*Screw\_Speed  
Screw\_Speed + Flow\_Rate\*Melt\_Temp\*Viscosity + Inj\_Speed\*Inj\_Press\*Melt\_Temp +  
Flow\_Rate\*Inj\_Speed\*Inj\_Press\*Viscosity\*Screw\_Speed  
Flow\_Rate\*Inj\_Speed + Inj\_Press\*Viscosity +  
Flow\_Rate\*Inj\_Press\*Melt\_Temp\*Screw\_Speed +  
Inj\_Speed\*Melt\_Temp\*Viscosity\*Screw\_Speed  
Flow\_Rate\*Inj\_Press + Inj\_Speed\*Viscosity +  
Flow\_Rate\*Inj\_Speed\*Melt\_Temp\*Screw\_Speed +  
Inj\_Press\*Melt\_Temp\*Viscosity\*Screw\_Speed  
Flow\_Rate\*Melt\_Temp + Viscosity\*Screw\_Speed +  
Flow\_Rate\*Inj\_Speed\*Inj\_Press\*Screw\_Speed +  
Inj\_Speed\*Inj\_Press\*Melt\_Temp\*Viscosity  
Flow\_Rate\*Viscosity + Inj\_Speed\*Inj\_Press + Melt\_Temp\*Screw\_Speed +  
Flow\_Rate\*Inj\_Speed\*Inj\_Press\*Melt\_Temp\*Viscosity\*Screw\_Speed  
Flow\_Rate\*Screw\_Speed + Melt\_Temp\*Viscosity +  
Flow\_Rate\*Inj\_Speed\*Inj\_Press\*Melt\_Temp +  
Inj\_Speed\*Inj\_Press\*Viscosity\*Screw\_Speed  
Inj\_Speed\*Melt\_Temp + Inj\_Press\*Screw\_Speed +  
Flow\_Rate\*Inj\_Speed\*Viscosity\*Screw\_Speed +  
Flow\_Rate\*Inj\_Press\*Melt\_Temp\*Viscosity  
Inj\_Speed\*Screw\_Speed + Inj\_Press\*Melt\_Temp +  
Flow\_Rate\*Inj\_Speed\*Melt\_Temp\*Viscosity +

```

Flow_Rate*Inj_Press*Viscosity*Screw_Speed
Flow_Rate*Inj_Speed*Melt_Temp + Flow_Rate*Inj_Press*Screw_Speed +
Inj_Speed*Viscosity*Screw_Speed + Inj_Press*Melt_Temp*Viscosity
Flow_Rate*Inj_Speed*Screw_Speed + Flow_Rate*Inj_Press*Melt_Temp +
Inj_Speed*Melt_Temp*Viscosity + Inj_Press*Viscosity*Screw_Speed

```

Alias Information for Terms in the Model.  
Totally confounded terms were removed from the analysis.

```

I + Flow_Rate*Inj_Speed*Inj_Press*Viscosity +
Flow_Rate*Melt_Temp*Viscosity*Screw_Speed +
Inj_Speed*Inj_Press*Melt_Temp*Screw_Speed
Flow_Rate + Inj_Speed*Inj_Press*Viscosity + Melt_Temp*Viscosity*Screw_Speed +
Flow_Rate*Inj_Speed*Inj_Press*Melt_Temp*Screw_Speed
Inj_Speed + Flow_Rate*Inj_Press*Viscosity + Inj_Press*Melt_Temp*Screw_Speed +
Flow_Rate*Inj_Speed*Melt_Temp*Viscosity*Screw_Speed
Inj_Press + Flow_Rate*Inj_Speed*Viscosity + Inj_Speed*Melt_Temp*Screw_Speed +
Flow_Rate*Inj_Press*Melt_Temp*Viscosity*Screw_Speed
Melt_Temp + Flow_Rate*Viscosity*Screw_Speed + Inj_Speed*Inj_Press*Screw_Speed +
Flow_Rate*Inj_Speed*Inj_Press*Melt_Temp*Viscosity
Viscosity + Flow_Rate*Inj_Speed*Inj_Press + Flow_Rate*Melt_Temp*Screw_Speed +
Inj_Speed*Inj_Press*Melt_Temp*Viscosity*Screw_Speed
Screw_Speed + Flow_Rate*Melt_Temp*Viscosity + Inj_Speed*Inj_Press*Melt_Temp +
Flow_Rate*Inj_Speed*Inj_Press*Viscosity*Screw_Speed
Flow_Rate*Inj_Speed + Inj_Press*Viscosity +
Flow_Rate*Inj_Press*Melt_Temp*Screw_Speed +
Inj_Speed*Melt_Temp*Viscosity*Screw_Speed
Flow_Rate*Inj_Press + Inj_Speed*Viscosity +
Flow_Rate*Inj_Speed*Melt_Temp*Screw_Speed +
Inj_Press*Melt_Temp*Viscosity*Screw_Speed
Flow_Rate*Melt_Temp + Viscosity*Screw_Speed +
Flow_Rate*Inj_Speed*Inj_Press*Screw_Speed +
Inj_Speed*Inj_Press*Melt_Temp*Viscosity
Flow_Rate*Viscosity + Inj_Speed*Inj_Press + Melt_Temp*Screw_Speed +
Flow_Rate*Inj_Speed*Inj_Press*Melt_Temp*Viscosity*Screw_Speed
Flow_Rate*Screw_Speed + Melt_Temp*Viscosity +
Flow_Rate*Inj_Speed*Inj_Press*Melt_Temp +
Inj_Speed*Inj_Press*Viscosity*Screw_Speed
Inj_Speed*Melt_Temp + Inj_Press*Screw_Speed +
Flow_Rate*Inj_Press*Melt_Temp*Viscosity +
Flow_Rate*Inj_Speed*Viscosity*Screw_Speed
Inj_Speed*Screw_Speed + Inj_Press*Melt_Temp +
Flow_Rate*Inj_Speed*Melt_Temp*Viscosity +
Flow_Rate*Inj_Press*Viscosity*Screw_Speed
Flow_Rate*Inj_Speed*Melt_Temp + Flow_Rate*Inj_Press*Screw_Speed +
Inj_Speed*Viscosity*Screw_Speed + Inj_Press*Melt_Temp*Viscosity
Flow_Rate*Inj_Press*Melt_Temp + Flow_Rate*Inj_Speed*Screw_Speed +
Inj_Speed*Melt_Temp*Viscosity + Inj_Press*Viscosity*Screw_Speed

```

## Factorial Fit: Shrinkage versus Flow\_Rate, Inj\_Speed, ...

Estimated Effects and Coefficients for Shrinkage (coded units)

| Term        | Effect | Coef   |
|-------------|--------|--------|
| Constant    |        | 13.563 |
| Flow_Rate   | -1.875 | -0.937 |
| Inj_Speed   | -4.625 | -2.312 |
| Inj_Press   | 0.625  | 0.313  |
| Melt_Temp   | -2.625 | -1.312 |
| Viscosity   | -1.625 | -0.813 |
| Screw_Speed | 0.125  | 0.063  |

|                               |        |        |
|-------------------------------|--------|--------|
| Flow_Rate*Inj_Speed           | 3.875  | 1.938  |
| Flow_Rate*Inj_Press           | -1.875 | -0.938 |
| Flow_Rate*Melt_Temp           | 1.875  | 0.938  |
| Flow_Rate*Viscosity           | -1.625 | -0.812 |
| Flow_Rate*Screw_Speed         | -5.375 | -2.688 |
| Inj_Speed*Melt_Temp           | -0.875 | -0.438 |
| Inj_Speed*Screw_Speed         | -2.125 | -1.063 |
| Flow_Rate*Inj_Speed*Melt_Temp | -1.875 | -0.938 |
| Flow_Rate*Inj_Press*Melt_Temp | 6.875  | 3.438  |

S = \*      PRESS = \*

#### Analysis of Variance for Shrinkage (coded units)

| Source                        | DF | Seq SS  | Adj SS  | Adj MS  | F | P |
|-------------------------------|----|---------|---------|---------|---|---|
| Main Effects                  | 6  | 139.375 | 139.375 | 23.229  | * | * |
| Flow_Rate                     | 1  | 14.062  | 14.062  | 14.062  | * | * |
| Inj_Speed                     | 1  | 85.563  | 85.563  | 85.563  | * | * |
| Inj_Press                     | 1  | 1.562   | 1.562   | 1.562   | * | * |
| Melt_Temp                     | 1  | 27.562  | 27.563  | 27.563  | * | * |
| Viscosity                     | 1  | 10.563  | 10.563  | 10.563  | * | * |
| Screw_Speed                   | 1  | 0.063   | 0.063   | 0.063   | * | * |
| 2-Way Interactions            | 7  | 235.438 | 235.438 | 33.634  | * | * |
| Flow_Rate*Inj_Speed           | 1  | 60.063  | 60.063  | 60.063  | * | * |
| Flow_Rate*Inj_Press           | 1  | 14.063  | 14.063  | 14.063  | * | * |
| Flow_Rate*Melt_Temp           | 1  | 14.062  | 14.063  | 14.063  | * | * |
| Flow_Rate*Viscosity           | 1  | 10.563  | 10.562  | 10.562  | * | * |
| Flow_Rate*Screw_Speed         | 1  | 115.563 | 115.563 | 115.563 | * | * |
| Inj_Speed*Melt_Temp           | 1  | 3.063   | 3.063   | 3.063   | * | * |
| Inj_Speed*Screw_Speed         | 1  | 18.063  | 18.063  | 18.063  | * | * |
| 3-Way Interactions            | 2  | 203.125 | 203.125 | 101.563 | * | * |
| Flow_Rate*Inj_Speed*Melt_Temp | 1  | 14.063  | 14.063  | 14.063  | * | * |
| Flow_Rate*Inj_Press*Melt_Temp | 1  | 189.063 | 189.063 | 189.063 | * | * |
| Residual Error                | 0  | *       | *       | *       |   |   |
| Total                         | 15 | 577.938 |         |         |   |   |

#### Estimated Coefficients for Shrinkage using data in uncoded units

| Term                          | Coef      |
|-------------------------------|-----------|
| Constant                      | -10183.0  |
| Flow_Rate                     | 5054.93   |
| Inj_Speed                     | 406.415   |
| Inj_Press                     | 2.68838   |
| Melt_Temp                     | -26.3088  |
| Viscosity                     | 88.8638   |
| Screw_Speed                   | 962.649   |
| Flow_Rate*Inj_Speed           | 88.2629   |
| Flow_Rate*Inj_Press           | -75.1174  |
| Flow_Rate*Melt_Temp           | -20.2465  |
| Flow_Rate*Viscosity           | -30.5164  |
| Flow_Rate*Screw_Speed         | -25.2347  |
| Inj_Speed*Melt_Temp           | 1.04535   |
| Inj_Speed*Screw_Speed         | -39.3962  |
| Flow_Rate*Inj_Speed*Melt_Temp | -0.352113 |
| Flow_Rate*Inj_Press*Melt_Temp | 0.322770  |

#### Effects Pareto for Shrinkage

Alias Structure

```
I + Flow_Rate*Inj_Speed*Inj_Press*Viscosity +
    Flow_Rate*Melt_Temp*Viscosity*Screw_Speed +
    Inj_Speed*Inj_Press*Melt_Temp*Screw_Speed
Flow_Rate + Inj_Speed*Inj_Press*Viscosity + Melt_Temp*Viscosity*Screw_Speed +
    Flow_Rate*Inj_Speed*Inj_Press*Melt_Temp*Screw_Speed
Inj_Speed + Flow_Rate*Inj_Press*Viscosity + Inj_Press*Melt_Temp*Screw_Speed +
    Flow_Rate*Inj_Speed*Melt_Temp*Viscosity*Screw_Speed
Inj_Press + Flow_Rate*Inj_Speed*Viscosity + Inj_Speed*Melt_Temp*Screw_Speed +
    Flow_Rate*Inj_Press*Melt_Temp*Viscosity*Screw_Speed
Melt_Temp + Flow_Rate*Viscosity*Screw_Speed + Inj_Speed*Inj_Press*Screw_Speed +
    Flow_Rate*Inj_Speed*Inj_Press*Melt_Temp*Viscosity
Viscosity + Flow_Rate*Inj_Speed*Inj_Press + Flow_Rate*Melt_Temp*Screw_Speed +
    Inj_Speed*Inj_Press*Melt_Temp*Viscosity*Screw_Speed
Screw_Speed + Flow_Rate*Melt_Temp*Viscosity + Inj_Speed*Inj_Press*Melt_Temp +
    Flow_Rate*Inj_Speed*Inj_Press*Viscosity*Screw_Speed
Flow_Rate*Inj_Speed + Inj_Press*Viscosity +
    Flow_Rate*Inj_Press*Melt_Temp*Screw_Speed +
    Inj_Speed*Melt_Temp*Viscosity*Screw_Speed
Flow_Rate*Inj_Press + Inj_Speed*Viscosity +
    Flow_Rate*Inj_Speed*Melt_Temp*Screw_Speed +
    Inj_Press*Melt_Temp*Viscosity*Screw_Speed
Flow_Rate*Melt_Temp + Viscosity*Screw_Speed +
    Flow_Rate*Inj_Speed*Inj_Press*Screw_Speed +
    Inj_Speed*Inj_Press*Melt_Temp*Viscosity
Flow_Rate*Viscosity + Inj_Speed*Inj_Press + Melt_Temp*Screw_Speed +
    Flow_Rate*Inj_Speed*Inj_Press*Melt_Temp*Viscosity*Screw_Speed
Flow_Rate*Screw_Speed + Melt_Temp*Viscosity +
    Flow_Rate*Inj_Speed*Inj_Press*Melt_Temp +
    Inj_Speed*Inj_Press*Viscosity*Screw_Speed
Inj_Speed*Melt_Temp + Inj_Press*Screw_Speed +
    Flow_Rate*Inj_Speed*Viscosity*Screw_Speed +
    Flow_Rate*Inj_Press*Melt_Temp*Viscosity
Inj_Speed*Screw_Speed + Inj_Press*Melt_Temp +
    Flow_Rate*Inj_Speed*Melt_Temp*Viscosity +
    Flow_Rate*Inj_Press*Viscosity*Screw_Speed
Flow_Rate*Inj_Speed*Melt_Temp + Flow_Rate*Inj_Press*Screw_Speed +
    Inj_Speed*Viscosity*Screw_Speed + Inj_Press*Melt_Temp*Viscosity
Flow_Rate*Inj_Speed*Screw_Speed + Flow_Rate*Inj_Press*Melt_Temp +
    Inj_Speed*Melt_Temp*Viscosity + Inj_Press*Viscosity*Screw_Speed
```

Alias Information for Terms in the Model.

Totally confounded terms were removed from the analysis.

```
I + Flow_Rate*Inj_Speed*Inj_Press*Viscosity +
    Flow_Rate*Melt_Temp*Viscosity*Screw_Speed +
    Inj_Speed*Inj_Press*Melt_Temp*Screw_Speed
Flow_Rate + Inj_Speed*Inj_Press*Viscosity + Melt_Temp*Viscosity*Screw_Speed +
    Flow_Rate*Inj_Speed*Inj_Press*Melt_Temp*Screw_Speed
Inj_Speed + Flow_Rate*Inj_Press*Viscosity + Inj_Press*Melt_Temp*Screw_Speed +
    Flow_Rate*Inj_Speed*Melt_Temp*Viscosity*Screw_Speed
Inj_Press + Flow_Rate*Inj_Speed*Viscosity + Inj_Speed*Melt_Temp*Screw_Speed +
    Flow_Rate*Inj_Press*Melt_Temp*Viscosity*Screw_Speed
Melt_Temp + Flow_Rate*Viscosity*Screw_Speed + Inj_Speed*Inj_Press*Screw_Speed +
    Flow_Rate*Inj_Speed*Inj_Press*Melt_Temp*Viscosity
Viscosity + Flow_Rate*Inj_Speed*Inj_Press + Flow_Rate*Melt_Temp*Screw_Speed +
    Inj_Speed*Inj_Press*Melt_Temp*Viscosity*Screw_Speed
Screw_Speed + Flow_Rate*Melt_Temp*Viscosity + Inj_Speed*Inj_Press*Melt_Temp +
    Flow_Rate*Inj_Speed*Inj_Press*Viscosity*Screw_Speed
Flow_Rate*Inj_Speed + Inj_Press*Viscosity +
    Flow_Rate*Inj_Press*Melt_Temp*Screw_Speed +
```

```

      Inj_Speed*Melt_Temp*Viscosity*Screw_Speed
Flow_Rate*Inj_Press + Inj_Speed*Viscosity +
      Flow_Rate*Inj_Speed*Melt_Temp*Screw_Speed +
      Inj_Press*Melt_Temp*Viscosity*Screw_Speed
Flow_Rate*Melt_Temp + Viscosity*Screw_Speed +
      Flow_Rate*Inj_Speed*Inj_Press*Screw_Speed +
      Inj_Speed*Inj_Press*Melt_Temp*Viscosity
Flow_Rate*Viscosity + Inj_Speed*Inj_Press + Melt_Temp*Screw_Speed +
      Flow_Rate*Inj_Speed*Inj_Press*Melt_Temp*Viscosity*Screw_Speed
Flow_Rate*Screw_Speed + Melt_Temp*Viscosity +
      Flow_Rate*Inj_Speed*Inj_Press*Melt_Temp +
      Inj_Speed*Inj_Press*Viscosity*Screw_Speed
Inj_Speed*Melt_Temp + Inj_Press*Screw_Speed +
      Flow_Rate*Inj_Press*Melt_Temp*Viscosity +
      Flow_Rate*Inj_Speed*Viscosity*Screw_Speed
Inj_Speed*Screw_Speed + Inj_Press*Melt_Temp +
      Flow_Rate*Inj_Speed*Melt_Temp*Viscosity +
      Flow_Rate*Inj_Press*Viscosity*Screw_Speed
Flow_Rate*Inj_Speed*Melt_Temp + Flow_Rate*Inj_Press*Screw_Speed +
      Inj_Speed*Viscosity*Screw_Speed + Inj_Press*Melt_Temp*Viscosity
Flow_Rate*Inj_Press*Melt_Temp + Flow_Rate*Inj_Speed*Screw_Speed +
      Inj_Speed*Melt_Temp*Viscosity + Inj_Press*Viscosity*Screw_Speed

```

## Factorial Fit: Shrinkage versus Flow\_Rate, Inj\_Speed, ...

Estimated Effects and Coefficients for Shrinkage (coded units)

| Term                          | Effect | Coef   |
|-------------------------------|--------|--------|
| Constant                      |        | 13.250 |
| Flow_Rate                     | -1.250 | -0.625 |
| Inj_Speed                     | -4.000 | -2.000 |
| Inj_Press                     | -0.000 | -0.000 |
| Melt_Temp                     | -2.000 | -1.000 |
| Viscosity                     | -2.250 | -1.125 |
| Screw_Speed                   | -0.500 | -0.250 |
| Flow_Rate*Inj_Speed           | 3.250  | 1.625  |
| Flow_Rate*Inj_Press           | -1.250 | -0.625 |
| Flow_Rate*Melt_Temp           | 1.250  | 0.625  |
| Flow_Rate*Viscosity           | -1.000 | -0.500 |
| Flow_Rate*Screw_Speed         | -4.750 | -2.375 |
| Inj_Speed*Melt_Temp           | -1.500 | -0.750 |
| Inj_Speed*Screw_Speed         | -1.500 | -0.750 |
| Flow_Rate*Inj_Speed*Melt_Temp | -1.250 | -0.625 |
| Flow_Rate*Inj_Press*Melt_Temp | 6.250  | 3.125  |

S = \* PRESS = \*

Analysis of Variance for Shrinkage (coded units)

| Source              | DF | Seq SS  | Adj SS  | Adj MS | F | P |
|---------------------|----|---------|---------|--------|---|---|
| Main Effects        | 6  | 107.500 | 107.500 | 17.917 | * | * |
| Flow_Rate           | 1  | 6.250   | 6.250   | 6.250  | * | * |
| Inj_Speed           | 1  | 64.000  | 64.000  | 64.000 | * | * |
| Inj_Press           | 1  | 0.000   | 0.000   | 0.000  | * | * |
| Melt_Temp           | 1  | 16.000  | 16.000  | 16.000 | * | * |
| Viscosity           | 1  | 20.250  | 20.250  | 20.250 | * | * |
| Screw_Speed         | 1  | 1.000   | 1.000   | 1.000  | * | * |
| 2-Way Interactions  | 7  | 167.000 | 167.000 | 23.857 | * | * |
| Flow_Rate*Inj_Speed | 1  | 42.250  | 42.250  | 42.250 | * | * |
| Flow_Rate*Inj_Press | 1  | 6.250   | 6.250   | 6.250  | * | * |

|                               |    |         |         |         |   |   |
|-------------------------------|----|---------|---------|---------|---|---|
| Flow_Rate*Melt_Temp           | 1  | 6.250   | 6.250   | 6.250   | * | * |
| Flow_Rate*Viscosity           | 1  | 4.000   | 4.000   | 4.000   | * | * |
| Flow_Rate*Screw_Speed         | 1  | 90.250  | 90.250  | 90.250  | * | * |
| Inj_Speed*Melt_Temp           | 1  | 9.000   | 9.000   | 9.000   | * | * |
| Inj_Speed*Screw_Speed         | 1  | 9.000   | 9.000   | 9.000   | * | * |
| 3-Way Interactions            | 2  | 162.500 | 162.500 | 81.250  | * | * |
| Flow_Rate*Inj_Speed*Melt_Temp | 1  | 6.250   | 6.250   | 6.250   | * | * |
| Flow_Rate*Inj_Press*Melt_Temp | 1  | 156.250 | 156.250 | 156.250 | * | * |
| Residual Error                | 0  | *       | *       | *       |   |   |
| Total                         | 15 | 437.000 |         |         |   |   |

Estimated Coefficients for Shrinkage using data in uncoded units

| Term                          | Coef      |
|-------------------------------|-----------|
| Constant                      | -10667.1  |
| Flow_Rate                     | 5051.41   |
| Inj_Speed                     | 432.089   |
| Inj_Press                     | 1.77142   |
| Melt_Temp                     | -17.1392  |
| Viscosity                     | 52.1854   |
| Screw_Speed                   | 870.953   |
| Flow_Rate*Inj_Speed           | 60.0939   |
| Flow_Rate*Inj_Press           | -68.0751  |
| Flow_Rate*Melt_Temp           | -20.5399  |
| Flow_Rate*Viscosity           | -18.7793  |
| Flow_Rate*Screw_Speed         | -22.3005  |
| Inj_Speed*Melt_Temp           | 0.678568  |
| Inj_Speed*Screw_Speed         | -35.7284  |
| Flow_Rate*Inj_Speed*Melt_Temp | -0.234742 |
| Flow_Rate*Inj_Press*Melt_Temp | 0.293427  |

## Effects Pareto for Shrinkage

Alias Structure

```

I + Flow_Rate*Inj_Speed*Inj_Press*Viscosity +
    Flow_Rate*Melt_Temp*Viscosity*Screw_Speed +
    Inj_Speed*Inj_Press*Melt_Temp*Screw_Speed
Flow_Rate + Inj_Speed*Inj_Press*Viscosity + Melt_Temp*Viscosity*Screw_Speed +
    Flow_Rate*Inj_Speed*Inj_Press*Melt_Temp*Screw_Speed
Inj_Speed + Flow_Rate*Inj_Press*Viscosity + Inj_Press*Melt_Temp*Screw_Speed +
    Flow_Rate*Inj_Speed*Melt_Temp*Viscosity*Screw_Speed
Inj_Press + Flow_Rate*Inj_Speed*Viscosity + Inj_Speed*Melt_Temp*Screw_Speed +
    Flow_Rate*Inj_Press*Melt_Temp*Viscosity*Screw_Speed
Melt_Temp + Flow_Rate*Viscosity*Screw_Speed + Inj_Speed*Inj_Press*Screw_Speed +
    Flow_Rate*Inj_Speed*Inj_Press*Melt_Temp*Viscosity
Viscosity + Flow_Rate*Inj_Speed*Inj_Press + Flow_Rate*Melt_Temp*Screw_Speed +
    Inj_Speed*Inj_Press*Melt_Temp*Viscosity*Screw_Speed
Screw_Speed + Flow_Rate*Melt_Temp*Viscosity + Inj_Speed*Inj_Press*Melt_Temp +
    Flow_Rate*Inj_Speed*Inj_Press*Viscosity*Screw_Speed
Flow_Rate*Inj_Speed + Inj_Press*Viscosity +
    Flow_Rate*Inj_Press*Melt_Temp*Screw_Speed +
    Inj_Speed*Melt_Temp*Viscosity*Screw_Speed
Flow_Rate*Inj_Press + Inj_Speed*Viscosity +
    Flow_Rate*Inj_Speed*Melt_Temp*Screw_Speed +
    Inj_Press*Melt_Temp*Viscosity*Screw_Speed
Flow_Rate*Melt_Temp + Viscosity*Screw_Speed +
    Flow_Rate*Inj_Speed*Inj_Press*Screw_Speed +
    Inj_Speed*Inj_Press*Melt_Temp*Viscosity
Flow_Rate*Viscosity + Inj_Speed*Inj_Press + Melt_Temp*Screw_Speed +

```

```

Flow_Rate*Inj_Speed*Inj_Press*Melt_Temp*Viscosity*Screw_Speed
Flow_Rate*Screw_Speed + Melt_Temp*Viscosity +
Flow_Rate*Inj_Speed*Inj_Press*Melt_Temp +
Inj_Speed*Inj_Press*Viscosity*Screw_Speed
Inj_Speed*Melt_Temp + Inj_Press*Screw_Speed +
Flow_Rate*Inj_Speed*Viscosity*Screw_Speed +
Flow_Rate*Inj_Press*Melt_Temp*Viscosity
Inj_Speed*Screw_Speed + Inj_Press*Melt_Temp +
Flow_Rate*Inj_Speed*Melt_Temp*Viscosity +
Flow_Rate*Inj_Press*Viscosity*Screw_Speed
Flow_Rate*Inj_Speed*Melt_Temp + Flow_Rate*Inj_Press*Screw_Speed +
Inj_Speed*Viscosity*Screw_Speed + Inj_Press*Melt_Temp*Viscosity
Flow_Rate*Inj_Speed*Screw_Speed + Flow_Rate*Inj_Press*Melt_Temp +
Inj_Speed*Melt_Temp*Viscosity + Inj_Press*Viscosity*Screw_Speed

```

Alias Information for Terms in the Model.  
Totally confounded terms were removed from the analysis.

```

I + Flow_Rate*Inj_Speed*Inj_Press*Viscosity +
Flow_Rate*Melt_Temp*Viscosity*Screw_Speed +
Inj_Speed*Inj_Press*Melt_Temp*Screw_Speed
Flow_Rate + Inj_Speed*Inj_Press*Viscosity + Melt_Temp*Viscosity*Screw_Speed +
Flow_Rate*Inj_Speed*Inj_Press*Melt_Temp*Screw_Speed
Inj_Speed + Flow_Rate*Inj_Press*Viscosity + Inj_Press*Melt_Temp*Screw_Speed +
Flow_Rate*Inj_Speed*Melt_Temp*Viscosity*Screw_Speed
Inj_Press + Flow_Rate*Inj_Speed*Viscosity + Inj_Speed*Melt_Temp*Screw_Speed +
Flow_Rate*Inj_Press*Melt_Temp*Viscosity*Screw_Speed
Melt_Temp + Flow_Rate*Viscosity*Screw_Speed + Inj_Speed*Inj_Press*Screw_Speed +
Flow_Rate*Inj_Speed*Inj_Press*Melt_Temp*Viscosity
Viscosity + Flow_Rate*Inj_Speed*Inj_Press + Flow_Rate*Melt_Temp*Screw_Speed +
Inj_Speed*Inj_Press*Melt_Temp*Viscosity*Screw_Speed
Screw_Speed + Flow_Rate*Melt_Temp*Viscosity + Inj_Speed*Inj_Press*Melt_Temp +
Flow_Rate*Inj_Speed*Inj_Press*Viscosity*Screw_Speed
Flow_Rate*Inj_Speed + Inj_Press*Viscosity +
Flow_Rate*Inj_Press*Melt_Temp*Screw_Speed +
Inj_Speed*Melt_Temp*Viscosity*Screw_Speed
Flow_Rate*Inj_Press + Inj_Speed*Viscosity +
Flow_Rate*Inj_Speed*Melt_Temp*Screw_Speed +
Inj_Press*Melt_Temp*Viscosity*Screw_Speed
Flow_Rate*Melt_Temp + Viscosity*Screw_Speed +
Flow_Rate*Inj_Speed*Inj_Press*Screw_Speed +
Inj_Speed*Inj_Press*Melt_Temp*Viscosity
Flow_Rate*Viscosity + Inj_Speed*Inj_Press + Melt_Temp*Screw_Speed +
Flow_Rate*Inj_Speed*Inj_Press*Melt_Temp*Viscosity*Screw_Speed
Flow_Rate*Screw_Speed + Melt_Temp*Viscosity +
Flow_Rate*Inj_Speed*Inj_Press*Melt_Temp +
Inj_Speed*Inj_Press*Viscosity*Screw_Speed
Inj_Speed*Melt_Temp + Inj_Press*Screw_Speed +
Flow_Rate*Inj_Press*Melt_Temp*Viscosity +
Flow_Rate*Inj_Speed*Viscosity*Screw_Speed
Inj_Speed*Screw_Speed + Inj_Press*Melt_Temp +
Flow_Rate*Inj_Speed*Melt_Temp*Viscosity +
Flow_Rate*Inj_Press*Viscosity*Screw_Speed
Flow_Rate*Inj_Speed*Melt_Temp + Flow_Rate*Inj_Press*Screw_Speed +
Inj_Speed*Viscosity*Screw_Speed + Inj_Press*Melt_Temp*Viscosity
Flow_Rate*Inj_Press*Melt_Temp + Flow_Rate*Inj_Speed*Screw_Speed +
Inj_Speed*Melt_Temp*Viscosity + Inj_Press*Viscosity*Screw_Speed

```

## Factorial Fit: Shrinkage versus Flow\_Rate, Inj\_Speed, ...

Estimated Effects and Coefficients for Shrinkage (coded units)

| Term                          | Effect | Coef   |
|-------------------------------|--------|--------|
| Constant                      |        | 13.063 |
| Flow_Rate                     | -0.875 | -0.437 |
| Inj_Speed                     | -4.375 | -2.187 |
| Inj_Press                     | 0.375  | 0.187  |
| Melt_Temp                     | -1.625 | -0.813 |
| Viscosity                     | -2.625 | -1.313 |
| Screw_Speed                   | -0.875 | -0.437 |
| Flow_Rate*Inj_Speed           | 3.625  | 1.813  |
| Flow_Rate*Inj_Press           | -1.625 | -0.813 |
| Flow_Rate*Melt_Temp           | 0.875  | 0.437  |
| Flow_Rate*Viscosity           | -0.625 | -0.312 |
| Flow_Rate*Screw_Speed         | -4.375 | -2.187 |
| Inj_Speed*Melt_Temp           | -1.125 | -0.563 |
| Inj_Speed*Screw_Speed         | -1.875 | -0.938 |
| Flow_Rate*Inj_Speed*Melt_Temp | -1.625 | -0.813 |
| Flow_Rate*Inj_Press*Melt_Temp | 6.625  | 3.312  |

S = \*      PRESS = \*

#### Analysis of Variance for Shrinkage (coded units)

| Source                        | DF | Seq SS  | Adj SS  | Adj MS  | F | P |
|-------------------------------|----|---------|---------|---------|---|---|
| Main Effects                  | 6  | 121.375 | 121.375 | 20.229  | * | * |
| Flow_Rate                     | 1  | 3.062   | 3.062   | 3.062   | * | * |
| Inj_Speed                     | 1  | 76.562  | 76.562  | 76.562  | * | * |
| Inj_Press                     | 1  | 0.562   | 0.562   | 0.562   | * | * |
| Melt_Temp                     | 1  | 10.563  | 10.563  | 10.563  | * | * |
| Viscosity                     | 1  | 27.563  | 27.563  | 27.563  | * | * |
| Screw_Speed                   | 1  | 3.062   | 3.062   | 3.062   | * | * |
| 2-Way Interactions            | 7  | 163.437 | 163.437 | 23.348  | * | * |
| Flow_Rate*Inj_Speed           | 1  | 52.563  | 52.563  | 52.563  | * | * |
| Flow_Rate*Inj_Press           | 1  | 10.563  | 10.563  | 10.563  | * | * |
| Flow_Rate*Melt_Temp           | 1  | 3.062   | 3.062   | 3.062   | * | * |
| Flow_Rate*Viscosity           | 1  | 1.563   | 1.562   | 1.562   | * | * |
| Flow_Rate*Screw_Speed         | 1  | 76.562  | 76.562  | 76.562  | * | * |
| Inj_Speed*Melt_Temp           | 1  | 5.063   | 5.063   | 5.063   | * | * |
| Inj_Speed*Screw_Speed         | 1  | 14.062  | 14.063  | 14.063  | * | * |
| 3-Way Interactions            | 2  | 186.125 | 186.125 | 93.062  | * | * |
| Flow_Rate*Inj_Speed*Melt_Temp | 1  | 10.563  | 10.563  | 10.563  | * | * |
| Flow_Rate*Inj_Press*Melt_Temp | 1  | 175.562 | 175.562 | 175.562 | * | * |
| Residual Error                | 0  | *       | *       | *       |   |   |
| Total                         | 15 | 470.937 |         |         |   |   |

#### Estimated Coefficients for Shrinkage using data in uncoded units

| Term                  | Coef     |
|-----------------------|----------|
| Constant              | -10363.4 |
| Flow_Rate             | 5049.30  |
| Inj_Speed             | 416.685  |
| Inj_Press             | 2.32160  |
| Melt_Temp             | -21.5406 |
| Viscosity             | 30.1784  |
| Screw_Speed           | 914.967  |
| Flow_Rate*Inj_Speed   | 76.9953  |
| Flow_Rate*Inj_Press   | -72.3005 |
| Flow_Rate*Melt_Temp   | -20.7160 |
| Flow_Rate*Viscosity   | -11.7371 |
| Flow_Rate*Screw_Speed | -20.5399 |



|                               |           |
|-------------------------------|-----------|
| Inj_Speed*Melt_Temp           | 0.898638  |
| Inj_Speed*Screw_Speed         | -37.9291  |
| Flow_Rate*Inj_Speed*Melt_Temp | -0.305164 |
| Flow_Rate*Inj_Press*Melt_Temp | 0.311033  |

## Effects Pareto for Shrinkage

Alias Structure

```

I + Flow_Rate*Inj_Speed*Inj_Press*Viscosity +
    Flow_Rate*Melt_Temp*Viscosity*Screw_Speed +
    Inj_Speed*Inj_Press*Melt_Temp*Screw_Speed
Flow_Rate + Inj_Speed*Inj_Press*Viscosity + Melt_Temp*Viscosity*Screw_Speed +
    Flow_Rate*Inj_Speed*Inj_Press*Melt_Temp*Screw_Speed
Inj_Speed + Flow_Rate*Inj_Press*Viscosity + Inj_Press*Melt_Temp*Screw_Speed +
    Flow_Rate*Inj_Speed*Melt_Temp*Viscosity*Screw_Speed
Inj_Press + Flow_Rate*Inj_Speed*Viscosity + Inj_Speed*Melt_Temp*Screw_Speed +
    Flow_Rate*Inj_Press*Melt_Temp*Viscosity*Screw_Speed
Melt_Temp + Flow_Rate*Viscosity*Screw_Speed + Inj_Speed*Inj_Press*Screw_Speed +
    Flow_Rate*Inj_Speed*Inj_Press*Melt_Temp*Viscosity
Viscosity + Flow_Rate*Inj_Speed*Inj_Press + Flow_Rate*Melt_Temp*Screw_Speed +
    Inj_Speed*Inj_Press*Melt_Temp*Viscosity*Screw_Speed
Screw_Speed + Flow_Rate*Melt_Temp*Viscosity + Inj_Speed*Inj_Press*Melt_Temp +
    Flow_Rate*Inj_Speed*Inj_Press*Viscosity*Screw_Speed
Flow_Rate*Inj_Speed + Inj_Press*Viscosity +
    Flow_Rate*Inj_Press*Melt_Temp*Screw_Speed +
    Inj_Speed*Melt_Temp*Viscosity*Screw_Speed
Flow_Rate*Inj_Press + Inj_Speed*Viscosity +
    Flow_Rate*Inj_Speed*Melt_Temp*Screw_Speed +
    Inj_Press*Melt_Temp*Viscosity*Screw_Speed
Flow_Rate*Melt_Temp + Viscosity*Screw_Speed +
    Flow_Rate*Inj_Speed*Inj_Press*Screw_Speed +
    Inj_Speed*Inj_Press*Melt_Temp*Viscosity
Flow_Rate*Viscosity + Inj_Speed*Inj_Press + Melt_Temp*Screw_Speed +
    Flow_Rate*Inj_Speed*Inj_Press*Melt_Temp*Viscosity*Screw_Speed
Flow_Rate*Screw_Speed + Melt_Temp*Viscosity +
    Flow_Rate*Inj_Speed*Inj_Press*Melt_Temp +
    Inj_Speed*Inj_Press*Viscosity*Screw_Speed
Inj_Speed*Melt_Temp + Inj_Press*Screw_Speed +
    Flow_Rate*Inj_Speed*Viscosity*Screw_Speed +
    Flow_Rate*Inj_Press*Melt_Temp*Viscosity
Inj_Speed*Screw_Speed + Inj_Press*Melt_Temp +
    Flow_Rate*Inj_Speed*Melt_Temp*Viscosity +
    Flow_Rate*Inj_Press*Viscosity*Screw_Speed
Flow_Rate*Inj_Speed*Melt_Temp + Flow_Rate*Inj_Press*Screw_Speed +
    Inj_Speed*Viscosity*Screw_Speed + Inj_Press*Melt_Temp*Viscosity
Flow_Rate*Inj_Speed*Screw_Speed + Flow_Rate*Inj_Press*Melt_Temp +
    Inj_Speed*Melt_Temp*Viscosity + Inj_Press*Viscosity*Screw_Speed

```

Alias Information for Terms in the Model.

Totally confounded terms were removed from the analysis.

```

I + Flow_Rate*Inj_Speed*Inj_Press*Viscosity +
    Flow_Rate*Melt_Temp*Viscosity*Screw_Speed +
    Inj_Speed*Inj_Press*Melt_Temp*Screw_Speed
Flow_Rate + Inj_Speed*Inj_Press*Viscosity + Melt_Temp*Viscosity*Screw_Speed +
    Flow_Rate*Inj_Speed*Inj_Press*Melt_Temp*Screw_Speed
Inj_Speed + Flow_Rate*Inj_Press*Viscosity + Inj_Press*Melt_Temp*Screw_Speed +
    Flow_Rate*Inj_Speed*Melt_Temp*Viscosity*Screw_Speed
Inj_Press + Flow_Rate*Inj_Speed*Viscosity + Inj_Speed*Melt_Temp*Screw_Speed +

```

```

Flow_Rate*Inj_Press*Melt_Temp*Viscosity*Screw_Speed
Melt_Temp + Flow_Rate*Viscosity*Screw_Speed + Inj_Speed*Inj_Press*Screw_Speed +
Flow_Rate*Inj_Speed*Inj_Press*Melt_Temp*Viscosity
Viscosity + Flow_Rate*Inj_Speed*Inj_Press + Flow_Rate*Melt_Temp*Screw_Speed +
Inj_Speed*Inj_Press*Melt_Temp*Viscosity*Screw_Speed
Screw_Speed + Flow_Rate*Melt_Temp*Viscosity + Inj_Speed*Inj_Press*Melt_Temp +
Flow_Rate*Inj_Speed*Inj_Press*Viscosity*Screw_Speed
Flow_Rate*Inj_Speed + Inj_Press*Viscosity +
Flow_Rate*Inj_Press*Melt_Temp*Screw_Speed +
Inj_Speed*Melt_Temp*Viscosity*Screw_Speed
Flow_Rate*Inj_Press + Inj_Speed*Viscosity +
Flow_Rate*Inj_Speed*Inj_Press*Melt_Temp*Screw_Speed +
Inj_Press*Melt_Temp*Viscosity*Screw_Speed
Flow_Rate*Melt_Temp + Viscosity*Screw_Speed +
Flow_Rate*Inj_Speed*Inj_Press*Screw_Speed +
Inj_Speed*Inj_Press*Melt_Temp*Viscosity
Flow_Rate*Viscosity + Inj_Speed*Inj_Press + Melt_Temp*Screw_Speed +
Flow_Rate*Inj_Speed*Inj_Press*Melt_Temp*Viscosity*Screw_Speed
Flow_Rate*Screw_Speed + Melt_Temp*Viscosity +
Flow_Rate*Inj_Speed*Inj_Press*Melt_Temp +
Inj_Speed*Inj_Press*Viscosity*Screw_Speed
Inj_Speed*Melt_Temp + Inj_Press*Screw_Speed +
Flow_Rate*Inj_Press*Melt_Temp*Viscosity +
Flow_Rate*Inj_Speed*Viscosity*Screw_Speed
Inj_Speed*Screw_Speed + Inj_Press*Melt_Temp +
Flow_Rate*Inj_Speed*Melt_Temp*Viscosity +
Flow_Rate*Inj_Press*Viscosity*Screw_Speed
Flow_Rate*Inj_Speed*Melt_Temp + Flow_Rate*Inj_Press*Screw_Speed +
Inj_Speed*Viscosity*Screw_Speed + Inj_Press*Melt_Temp*Viscosity
Flow_Rate*Inj_Press*Melt_Temp + Flow_Rate*Inj_Speed*Screw_Speed +
Inj_Speed*Melt_Temp*Viscosity + Inj_Press*Viscosity*Screw_Speed

```

## Factorial Fit: Shrinkage versus Flow\_Rate, Inj\_Speed, ...

Estimated Effects and Coefficients for Shrinkage (coded units)

| Term                          | Effect | Coef   |
|-------------------------------|--------|--------|
| Constant                      |        | 13.313 |
| Flow_Rate                     | -1.375 | -0.687 |
| Inj_Speed                     | -3.875 | -1.937 |
| Inj_Press                     | -0.125 | -0.063 |
| Melt_Temp                     | -2.125 | -1.063 |
| Viscosity                     | -2.125 | -1.063 |
| Screw_Speed                   | -0.375 | -0.187 |
| Flow_Rate*Inj_Speed           | 3.125  | 1.562  |
| Flow_Rate*Inj_Press           | -1.125 | -0.563 |
| Flow_Rate*Melt_Temp           | 1.375  | 0.687  |
| Flow_Rate*Viscosity           | -1.125 | -0.562 |
| Flow_Rate*Screw_Speed         | -4.875 | -2.438 |
| Inj_Speed*Melt_Temp           | -1.625 | -0.812 |
| Inj_Speed*Screw_Speed         | -1.375 | -0.687 |
| Flow_Rate*Inj_Speed*Melt_Temp | -1.125 | -0.563 |
| Flow_Rate*Inj_Press*Melt_Temp | 6.125  | 3.063  |

S = \* PRESS = \*

Analysis of Variance for Shrinkage (coded units)

| Source       | DF | Seq SS  | Adj SS  | Adj MS | F | P |
|--------------|----|---------|---------|--------|---|---|
| Main Effects | 6  | 104.375 | 104.375 | 17.396 | * | * |

|                               |    |         |         |         |   |   |
|-------------------------------|----|---------|---------|---------|---|---|
| Flow_Rate                     | 1  | 7.563   | 7.562   | 7.562   | * | * |
| Inj_Speed                     | 1  | 60.062  | 60.062  | 60.062  | * | * |
| Inj_Press                     | 1  | 0.063   | 0.063   | 0.063   | * | * |
| Melt_Temp                     | 1  | 18.063  | 18.063  | 18.063  | * | * |
| Viscosity                     | 1  | 18.063  | 18.063  | 18.063  | * | * |
| Screw_Speed                   | 1  | 0.562   | 0.562   | 0.562   | * | * |
| 2-Way Interactions            | 7  | 169.937 | 169.938 | 24.277  | * | * |
| Flow_Rate*Inj_Speed           | 1  | 39.062  | 39.062  | 39.062  | * | * |
| Flow_Rate*Inj_Press           | 1  | 5.063   | 5.063   | 5.063   | * | * |
| Flow_Rate*Melt_Temp           | 1  | 7.562   | 7.562   | 7.562   | * | * |
| Flow_Rate*Viscosity           | 1  | 5.063   | 5.062   | 5.062   | * | * |
| Flow_Rate*Screw_Speed         | 1  | 95.063  | 95.063  | 95.063  | * | * |
| Inj_Speed*Melt_Temp           | 1  | 10.562  | 10.562  | 10.562  | * | * |
| Inj_Speed*Screw_Speed         | 1  | 7.562   | 7.562   | 7.562   | * | * |
| 3-Way Interactions            | 2  | 155.125 | 155.125 | 77.563  | * | * |
| Flow_Rate*Inj_Speed*Melt_Temp | 1  | 5.063   | 5.063   | 5.063   | * | * |
| Flow_Rate*Inj_Press*Melt_Temp | 1  | 150.063 | 150.063 | 150.063 | * | * |
| Residual Error                | 0  | *       | *       | *       |   |   |
| Total                         | 15 | 429.437 |         |         |   |   |

Estimated Coefficients for Shrinkage using data in uncoded units

| Term                          | Coef      |
|-------------------------------|-----------|
| Constant                      | -10768.3  |
| Flow_Rate                     | 5052.11   |
| Inj_Speed                     | 437.224   |
| Inj_Press                     | 1.58803   |
| Melt_Temp                     | -15.6721  |
| Viscosity                     | 59.5211   |
| Screw_Speed                   | 856.282   |
| Flow_Rate*Inj_Speed           | 54.4601   |
| Flow_Rate*Inj_Press           | -66.6667  |
| Flow_Rate*Melt_Temp           | -20.4812  |
| Flow_Rate*Viscosity           | -21.1268  |
| Flow_Rate*Screw_Speed         | -22.8873  |
| Inj_Speed*Melt_Temp           | 0.605211  |
| Inj_Speed*Screw_Speed         | -34.9948  |
| Flow_Rate*Inj_Speed*Melt_Temp | -0.211268 |
| Flow_Rate*Inj_Press*Melt_Temp | 0.287559  |

## Effects Pareto for Shrinkage

Alias Structure

```

I + Flow_Rate*Inj_Speed*Inj_Press*Viscosity +
    Flow_Rate*Melt_Temp*Viscosity*Screw_Speed +
    Inj_Speed*Inj_Press*Melt_Temp*Screw_Speed
Flow_Rate + Inj_Speed*Inj_Press*Viscosity + Melt_Temp*Viscosity*Screw_Speed +
    Flow_Rate*Inj_Speed*Inj_Press*Melt_Temp*Screw_Speed
Inj_Speed + Flow_Rate*Inj_Press*Viscosity + Inj_Press*Melt_Temp*Screw_Speed +
    Flow_Rate*Inj_Speed*Melt_Temp*Viscosity*Screw_Speed
Inj_Press + Flow_Rate*Inj_Speed*Viscosity + Inj_Speed*Melt_Temp*Screw_Speed +
    Flow_Rate*Inj_Press*Melt_Temp*Viscosity*Screw_Speed
Melt_Temp + Flow_Rate*Viscosity*Screw_Speed + Inj_Speed*Inj_Press*Screw_Speed +
    Flow_Rate*Inj_Speed*Inj_Press*Melt_Temp*Viscosity
Viscosity + Flow_Rate*Inj_Speed*Inj_Press + Flow_Rate*Melt_Temp*Screw_Speed +
    Inj_Speed*Inj_Press*Melt_Temp*Viscosity*Screw_Speed
Screw_Speed + Flow_Rate*Melt_Temp*Viscosity + Inj_Speed*Inj_Press*Melt_Temp +
    Flow_Rate*Inj_Speed*Inj_Press*Viscosity*Screw_Speed
Flow_Rate*Inj_Speed + Inj_Press*Viscosity +

```



$\text{Flow\_Rate} \times \text{Inj\_Speed} \times \text{Melt\_Temp} + \text{Flow\_Rate} \times \text{Inj\_Press} \times \text{Screw\_Speed} +$   
 $\text{Inj\_Speed} \times \text{Viscosity} \times \text{Screw\_Speed} + \text{Inj\_Press} \times \text{Melt\_Temp} \times \text{Viscosity}$   
 $\text{Flow\_Rate} \times \text{Inj\_Press} \times \text{Melt\_Temp} + \text{Flow\_Rate} \times \text{Inj\_Speed} \times \text{Screw\_Speed} +$   
 $\text{Inj\_Speed} \times \text{Melt\_Temp} \times \text{Viscosity} + \text{Inj\_Press} \times \text{Viscosity} \times \text{Screw\_Speed}$

## Factorial Fit: Shrinkage versus Flow\_Rate, Inj\_Speed, ...

Estimated Effects and Coefficients for Shrinkage (coded units)

| Term                          | Effect | Coef   |
|-------------------------------|--------|--------|
| Constant                      |        | 13.000 |
| Flow_Rate                     | -0.750 | -0.375 |
| Inj_Speed                     | -4.500 | -2.250 |
| Inj_Press                     | -0.750 | -0.375 |
| Melt_Temp                     | -2.750 | -1.375 |
| Viscosity                     | -1.500 | -0.750 |
| Screw_Speed                   | -1.000 | -0.500 |
| Flow_Rate*Inj_Speed           | 3.750  | 1.875  |
| Flow_Rate*Inj_Press           | -0.500 | -0.250 |
| Flow_Rate*Melt_Temp           | 2.000  | 1.000  |
| Flow_Rate*Viscosity           | -1.750 | -0.875 |
| Flow_Rate*Screw_Speed         | -4.250 | -2.125 |
| Inj_Speed*Melt_Temp           | -2.250 | -1.125 |
| Inj_Speed*Screw_Speed         | -2.000 | -1.000 |
| Flow_Rate*Inj_Speed*Melt_Temp | -0.500 | -0.250 |
| Flow_Rate*Inj_Press*Melt_Temp | 6.750  | 3.375  |

S = \*      PRESS = \*

Analysis of Variance for Shrinkage (coded units)

| Source                        | DF | Seq SS  | Adj SS  | Adj MS  | F | P |
|-------------------------------|----|---------|---------|---------|---|---|
| Main Effects                  | 6  | 128.750 | 128.750 | 21.458  | * | * |
| Flow_Rate                     | 1  | 2.250   | 2.250   | 2.250   | * | * |
| Inj_Speed                     | 1  | 81.000  | 81.000  | 81.000  | * | * |
| Inj_Press                     | 1  | 2.250   | 2.250   | 2.250   | * | * |
| Melt_Temp                     | 1  | 30.250  | 30.250  | 30.250  | * | * |
| Viscosity                     | 1  | 9.000   | 9.000   | 9.000   | * | * |
| Screw_Speed                   | 1  | 4.000   | 4.000   | 4.000   | * | * |
| 2-Way Interactions            | 7  | 194.000 | 194.000 | 27.714  | * | * |
| Flow_Rate*Inj_Speed           | 1  | 56.250  | 56.250  | 56.250  | * | * |
| Flow_Rate*Inj_Press           | 1  | 1.000   | 1.000   | 1.000   | * | * |
| Flow_Rate*Melt_Temp           | 1  | 16.000  | 16.000  | 16.000  | * | * |
| Flow_Rate*Viscosity           | 1  | 12.250  | 12.250  | 12.250  | * | * |
| Flow_Rate*Screw_Speed         | 1  | 72.250  | 72.250  | 72.250  | * | * |
| Inj_Speed*Melt_Temp           | 1  | 20.250  | 20.250  | 20.250  | * | * |
| Inj_Speed*Screw_Speed         | 1  | 16.000  | 16.000  | 16.000  | * | * |
| 3-Way Interactions            | 2  | 183.250 | 183.250 | 91.625  | * | * |
| Flow_Rate*Inj_Speed*Melt_Temp | 1  | 1.000   | 1.000   | 1.000   | * | * |
| Flow_Rate*Inj_Press*Melt_Temp | 1  | 182.250 | 182.250 | 182.250 | * | * |
| Residual Error                | 0  | *       | *       | *       |   |   |
| Total                         | 15 | 506.000 |         |         |   |   |

Estimated Coefficients for Shrinkage using data in uncoded units

| Term      | Coef     |
|-----------|----------|
| Constant  | -13621.9 |
| Flow_Rate | 6123.71  |
| Inj_Speed | 580.270  |

|                               |            |
|-------------------------------|------------|
| Inj_Press                     | 0.671068   |
| Melt_Temp                     | -8.33638   |
| Viscosity                     | 96.1995    |
| Screw_Speed                   | 929.638    |
| Flow_Rate*Inj_Speed           | 28.6385    |
| Flow_Rate*Inj_Press           | -73.1221   |
| Flow_Rate*Melt_Temp           | -25.4695   |
| Flow_Rate*Viscosity           | -32.8638   |
| Flow_Rate*Screw_Speed         | -19.9531   |
| Inj_Speed*Melt_Temp           | 0.238427   |
| Inj_Speed*Screw_Speed         | -38.6627   |
| Flow_Rate*Inj_Speed*Melt_Temp | -0.0938967 |
| Flow_Rate*Inj_Press*Melt_Temp | 0.316901   |

## Effects Pareto for Shrinkage

Alias Structure

```

I + Flow_Rate*Inj_Speed*Inj_Press*Viscosity +
    Flow_Rate*Melt_Temp*Viscosity*Screw_Speed +
    Inj_Speed*Inj_Press*Melt_Temp*Screw_Speed
Flow_Rate + Inj_Speed*Inj_Press*Viscosity + Melt_Temp*Viscosity*Screw_Speed +
    Flow_Rate*Inj_Speed*Inj_Press*Melt_Temp*Screw_Speed
Inj_Speed + Flow_Rate*Inj_Press*Viscosity + Inj_Press*Melt_Temp*Screw_Speed +
    Flow_Rate*Inj_Speed*Melt_Temp*Viscosity*Screw_Speed
Inj_Press + Flow_Rate*Inj_Speed*Viscosity + Inj_Speed*Melt_Temp*Screw_Speed +
    Flow_Rate*Inj_Press*Melt_Temp*Viscosity*Screw_Speed
Melt_Temp + Flow_Rate*Viscosity*Screw_Speed + Inj_Speed*Inj_Press*Screw_Speed +
    Flow_Rate*Inj_Speed*Inj_Press*Melt_Temp*Viscosity
Viscosity + Flow_Rate*Inj_Speed*Inj_Press + Flow_Rate*Melt_Temp*Screw_Speed +
    Inj_Speed*Inj_Press*Melt_Temp*Viscosity*Screw_Speed
Screw_Speed + Flow_Rate*Melt_Temp*Viscosity + Inj_Speed*Inj_Press*Melt_Temp +
    Flow_Rate*Inj_Speed*Inj_Press*Viscosity*Screw_Speed
Flow_Rate*Inj_Speed + Inj_Press*Viscosity +
    Flow_Rate*Inj_Press*Melt_Temp*Screw_Speed +
    Inj_Speed*Melt_Temp*Viscosity*Screw_Speed
Flow_Rate*Inj_Press + Inj_Speed*Viscosity +
    Flow_Rate*Inj_Speed*Melt_Temp*Screw_Speed +
    Inj_Press*Melt_Temp*Viscosity*Screw_Speed
Flow_Rate*Melt_Temp + Viscosity*Screw_Speed +
    Flow_Rate*Inj_Speed*Inj_Press*Screw_Speed +
    Inj_Speed*Inj_Press*Melt_Temp*Viscosity
Flow_Rate*Viscosity + Inj_Speed*Inj_Press + Melt_Temp*Screw_Speed +
    Flow_Rate*Inj_Speed*Inj_Press*Melt_Temp*Viscosity*Screw_Speed
Flow_Rate*Screw_Speed + Melt_Temp*Viscosity +
    Flow_Rate*Inj_Speed*Inj_Press*Melt_Temp +
    Inj_Speed*Inj_Press*Viscosity*Screw_Speed
Inj_Speed*Melt_Temp + Inj_Press*Screw_Speed +
    Flow_Rate*Inj_Speed*Viscosity*Screw_Speed +
    Flow_Rate*Inj_Press*Melt_Temp*Viscosity
Inj_Speed*Screw_Speed + Inj_Press*Melt_Temp +
    Flow_Rate*Inj_Speed*Melt_Temp*Viscosity +
    Flow_Rate*Inj_Press*Viscosity*Screw_Speed
Flow_Rate*Inj_Speed*Melt_Temp + Flow_Rate*Inj_Press*Screw_Speed +
    Inj_Speed*Viscosity*Screw_Speed + Inj_Press*Melt_Temp*Viscosity
Flow_Rate*Inj_Speed*Screw_Speed + Flow_Rate*Inj_Press*Melt_Temp +
    Inj_Speed*Melt_Temp*Viscosity + Inj_Press*Viscosity*Screw_Speed

```

Alias Information for Terms in the Model.

Totally confounded terms were removed from the analysis.

$$\begin{aligned}
& I + \text{Flow\_Rate} * \text{Inj\_Speed} * \text{Inj\_Press} * \text{Viscosity} + \\
& \quad \text{Flow\_Rate} * \text{Melt\_Temp} * \text{Viscosity} * \text{Screw\_Speed} + \\
& \quad \text{Inj\_Speed} * \text{Inj\_Press} * \text{Melt\_Temp} * \text{Screw\_Speed} \\
& \text{Flow\_Rate} + \text{Inj\_Speed} * \text{Inj\_Press} * \text{Viscosity} + \text{Melt\_Temp} * \text{Viscosity} * \text{Screw\_Speed} + \\
& \quad \text{Flow\_Rate} * \text{Inj\_Speed} * \text{Inj\_Press} * \text{Melt\_Temp} * \text{Screw\_Speed} \\
& \text{Inj\_Speed} + \text{Flow\_Rate} * \text{Inj\_Press} * \text{Viscosity} + \text{Inj\_Press} * \text{Melt\_Temp} * \text{Screw\_Speed} + \\
& \quad \text{Flow\_Rate} * \text{Inj\_Speed} * \text{Melt\_Temp} * \text{Viscosity} * \text{Screw\_Speed} \\
& \text{Inj\_Press} + \text{Flow\_Rate} * \text{Inj\_Speed} * \text{Viscosity} + \text{Inj\_Speed} * \text{Melt\_Temp} * \text{Screw\_Speed} + \\
& \quad \text{Flow\_Rate} * \text{Inj\_Press} * \text{Melt\_Temp} * \text{Viscosity} * \text{Screw\_Speed} \\
& \text{Melt\_Temp} + \text{Flow\_Rate} * \text{Viscosity} * \text{Screw\_Speed} + \text{Inj\_Speed} * \text{Inj\_Press} * \text{Screw\_Speed} + \\
& \quad \text{Flow\_Rate} * \text{Inj\_Speed} * \text{Inj\_Press} * \text{Melt\_Temp} * \text{Viscosity} \\
& \text{Viscosity} + \text{Flow\_Rate} * \text{Inj\_Speed} * \text{Inj\_Press} + \text{Flow\_Rate} * \text{Melt\_Temp} * \text{Screw\_Speed} + \\
& \quad \text{Inj\_Speed} * \text{Inj\_Press} * \text{Melt\_Temp} * \text{Viscosity} * \text{Screw\_Speed} \\
& \text{Screw\_Speed} + \text{Flow\_Rate} * \text{Melt\_Temp} * \text{Viscosity} + \text{Inj\_Speed} * \text{Inj\_Press} * \text{Melt\_Temp} + \\
& \quad \text{Flow\_Rate} * \text{Inj\_Speed} * \text{Inj\_Press} * \text{Viscosity} * \text{Screw\_Speed} \\
& \text{Flow\_Rate} * \text{Inj\_Speed} + \text{Inj\_Press} * \text{Viscosity} + \\
& \quad \text{Flow\_Rate} * \text{Inj\_Press} * \text{Melt\_Temp} * \text{Screw\_Speed} + \\
& \quad \text{Inj\_Speed} * \text{Melt\_Temp} * \text{Viscosity} * \text{Screw\_Speed} \\
& \text{Flow\_Rate} * \text{Inj\_Press} + \text{Inj\_Speed} * \text{Viscosity} + \\
& \quad \text{Flow\_Rate} * \text{Inj\_Speed} * \text{Melt\_Temp} * \text{Screw\_Speed} + \\
& \quad \text{Inj\_Press} * \text{Melt\_Temp} * \text{Viscosity} * \text{Screw\_Speed} \\
& \text{Flow\_Rate} * \text{Melt\_Temp} + \text{Viscosity} * \text{Screw\_Speed} + \\
& \quad \text{Flow\_Rate} * \text{Inj\_Speed} * \text{Inj\_Press} * \text{Screw\_Speed} + \\
& \quad \text{Inj\_Speed} * \text{Inj\_Press} * \text{Melt\_Temp} * \text{Viscosity} \\
& \text{Flow\_Rate} * \text{Viscosity} + \text{Inj\_Speed} * \text{Inj\_Press} + \text{Melt\_Temp} * \text{Screw\_Speed} + \\
& \quad \text{Flow\_Rate} * \text{Inj\_Speed} * \text{Inj\_Press} * \text{Melt\_Temp} * \text{Viscosity} * \text{Screw\_Speed} \\
& \text{Flow\_Rate} * \text{Screw\_Speed} + \text{Melt\_Temp} * \text{Viscosity} + \\
& \quad \text{Flow\_Rate} * \text{Inj\_Speed} * \text{Inj\_Press} * \text{Melt\_Temp} + \\
& \quad \text{Inj\_Speed} * \text{Inj\_Press} * \text{Viscosity} * \text{Screw\_Speed} \\
& \text{Inj\_Speed} * \text{Melt\_Temp} + \text{Inj\_Press} * \text{Screw\_Speed} + \\
& \quad \text{Flow\_Rate} * \text{Inj\_Press} * \text{Melt\_Temp} * \text{Viscosity} + \\
& \quad \text{Flow\_Rate} * \text{Inj\_Speed} * \text{Viscosity} * \text{Screw\_Speed} \\
& \text{Inj\_Speed} * \text{Screw\_Speed} + \text{Inj\_Press} * \text{Melt\_Temp} + \\
& \quad \text{Flow\_Rate} * \text{Inj\_Speed} * \text{Melt\_Temp} * \text{Viscosity} + \\
& \quad \text{Flow\_Rate} * \text{Inj\_Press} * \text{Viscosity} * \text{Screw\_Speed} \\
& \text{Flow\_Rate} * \text{Inj\_Speed} * \text{Melt\_Temp} + \text{Flow\_Rate} * \text{Inj\_Press} * \text{Screw\_Speed} + \\
& \quad \text{Inj\_Speed} * \text{Viscosity} * \text{Screw\_Speed} + \text{Inj\_Press} * \text{Melt\_Temp} * \text{Viscosity} \\
& \text{Flow\_Rate} * \text{Inj\_Press} * \text{Melt\_Temp} + \text{Flow\_Rate} * \text{Inj\_Speed} * \text{Screw\_Speed} + \\
& \quad \text{Inj\_Speed} * \text{Melt\_Temp} * \text{Viscosity} + \text{Inj\_Press} * \text{Viscosity} * \text{Screw\_Speed}
\end{aligned}$$

## Factorial Fit: Shrinkage versus Flow\_Rate, Inj\_Speed, ...

Estimated Effects and Coefficients for Shrinkage (coded units)

| Term                          | Effect | Coef   |
|-------------------------------|--------|--------|
| Constant                      |        | 13.563 |
| Flow_Rate                     | -1.875 | -0.937 |
| Inj_Speed                     | -4.375 | -2.187 |
| Inj_Press                     | -0.625 | -0.313 |
| Melt_Temp                     | -2.625 | -1.313 |
| Viscosity                     | -2.625 | -1.313 |
| Screw_Speed                   | -0.875 | -0.438 |
| Flow_Rate*Inj_Speed           | 3.625  | 1.812  |
| Flow_Rate*Inj_Press           | -0.625 | -0.313 |
| Flow_Rate*Melt_Temp           | 1.875  | 0.938  |
| Flow_Rate*Viscosity           | -0.625 | -0.312 |
| Flow_Rate*Screw_Speed         | -4.375 | -2.188 |
| Inj_Speed*Melt_Temp           | -1.125 | -0.563 |
| Inj_Speed*Screw_Speed         | -0.875 | -0.438 |
| Flow_Rate*Inj_Speed*Melt_Temp | -1.625 | -0.813 |
| Flow_Rate*Inj_Press*Melt_Temp | 5.625  | 2.813  |

S = \* PRESS = \*

#### Analysis of Variance for Shrinkage (coded units)

| Source                        | DF | Seq SS  | Adj SS  | Adj MS  | F | P |
|-------------------------------|----|---------|---------|---------|---|---|
| Main Effects                  | 6  | 150.375 | 150.375 | 25.062  | * | * |
| Flow_Rate                     | 1  | 14.062  | 14.062  | 14.062  | * | * |
| Inj_Speed                     | 1  | 76.562  | 76.562  | 76.562  | * | * |
| Inj_Press                     | 1  | 1.563   | 1.563   | 1.563   | * | * |
| Melt_Temp                     | 1  | 27.563  | 27.563  | 27.563  | * | * |
| Viscosity                     | 1  | 27.562  | 27.562  | 27.562  | * | * |
| Screw_Speed                   | 1  | 3.063   | 3.063   | 3.063   | * | * |
| 2-Way Interactions            | 7  | 154.437 | 154.437 | 22.062  | * | * |
| Flow_Rate*Inj_Speed           | 1  | 52.562  | 52.562  | 52.562  | * | * |
| Flow_Rate*Inj_Press           | 1  | 1.563   | 1.563   | 1.563   | * | * |
| Flow_Rate*Melt_Temp           | 1  | 14.062  | 14.062  | 14.062  | * | * |
| Flow_Rate*Viscosity           | 1  | 1.563   | 1.562   | 1.562   | * | * |
| Flow_Rate*Screw_Speed         | 1  | 76.562  | 76.563  | 76.563  | * | * |
| Inj_Speed*Melt_Temp           | 1  | 5.063   | 5.063   | 5.063   | * | * |
| Inj_Speed*Screw_Speed         | 1  | 3.062   | 3.063   | 3.063   | * | * |
| 3-Way Interactions            | 2  | 137.125 | 137.125 | 68.563  | * | * |
| Flow_Rate*Inj_Speed*Melt_Temp | 1  | 10.563  | 10.563  | 10.563  | * | * |
| Flow_Rate*Inj_Press*Melt_Temp | 1  | 126.563 | 126.563 | 126.563 | * | * |
| Residual Error                | 0  | *       | *       | *       |   |   |
| Total                         | 15 | 441.937 |         |         |   |   |

#### Estimated Coefficients for Shrinkage using data in uncoded units

| Term                          | Coef      |
|-------------------------------|-----------|
| Constant                      | -7634.55  |
| Flow_Rate                     | 3922.54   |
| Inj_Speed                     | 316.919   |
| Inj_Press                     | 0.854460  |
| Melt_Temp                     | -23.0077  |
| Viscosity                     | 30.1784   |
| Screw_Speed                   | 782.925   |
| Flow_Rate*Inj_Speed           | 76.9953   |
| Flow_Rate*Inj_Press           | -61.0329  |
| Flow_Rate*Melt_Temp           | -16.0211  |
| Flow_Rate*Viscosity           | -11.7371  |
| Flow_Rate*Screw_Speed         | -20.5399  |
| Inj_Speed*Melt_Temp           | 0.898638  |
| Inj_Speed*Screw_Speed         | -32.0606  |
| Flow_Rate*Inj_Speed*Melt_Temp | -0.305164 |
| Flow_Rate*Inj_Press*Melt_Temp | 0.264085  |

### Effects Pareto for Shrinkage

#### Alias Structure

```

I + Flow_Rate*Inj_Speed*Inj_Press*Viscosity +
    Flow_Rate*Melt_Temp*Viscosity*Screw_Speed +
    Inj_Speed*Inj_Press*Melt_Temp*Screw_Speed
Flow_Rate + Inj_Speed*Inj_Press*Viscosity + Melt_Temp*Viscosity*Screw_Speed +
    Flow_Rate*Inj_Speed*Inj_Press*Melt_Temp*Screw_Speed
Inj_Speed + Flow_Rate*Inj_Press*Viscosity + Inj_Press*Melt_Temp*Screw_Speed +
    Flow_Rate*Inj_Speed*Melt_Temp*Viscosity*Screw_Speed

```





$\text{Flow\_Rate} \times \text{Screw\_Speed} + \text{Melt\_Temp} \times \text{Viscosity} +$   
 $\text{Flow\_Rate} \times \text{Inj\_Speed} \times \text{Inj\_Press} \times \text{Melt\_Temp} +$   
 $\text{Inj\_Speed} \times \text{Inj\_Press} \times \text{Viscosity} \times \text{Screw\_Speed}$   
 $\text{Inj\_Speed} \times \text{Melt\_Temp} + \text{Inj\_Press} \times \text{Screw\_Speed} +$   
 $\text{Flow\_Rate} \times \text{Inj\_Press} \times \text{Melt\_Temp} \times \text{Viscosity} +$   
 $\text{Flow\_Rate} \times \text{Inj\_Speed} \times \text{Viscosity} \times \text{Screw\_Speed}$   
 $\text{Inj\_Speed} \times \text{Screw\_Speed} + \text{Inj\_Press} \times \text{Melt\_Temp} +$   
 $\text{Flow\_Rate} \times \text{Inj\_Speed} \times \text{Melt\_Temp} \times \text{Viscosity} +$   
 $\text{Flow\_Rate} \times \text{Inj\_Press} \times \text{Viscosity} \times \text{Screw\_Speed}$   
 $\text{Flow\_Rate} \times \text{Inj\_Speed} \times \text{Melt\_Temp} + \text{Flow\_Rate} \times \text{Inj\_Press} \times \text{Screw\_Speed} +$   
 $\text{Inj\_Speed} \times \text{Viscosity} \times \text{Screw\_Speed} + \text{Inj\_Press} \times \text{Melt\_Temp} \times \text{Viscosity}$   
 $\text{Flow\_Rate} \times \text{Inj\_Press} \times \text{Melt\_Temp} + \text{Flow\_Rate} \times \text{Inj\_Speed} \times \text{Screw\_Speed} +$   
 $\text{Inj\_Speed} \times \text{Melt\_Temp} \times \text{Viscosity} + \text{Inj\_Press} \times \text{Viscosity} \times \text{Screw\_Speed}$

## Factorial Fit: Shrinkage versus Flow\_Rate, Inj\_Speed, ...

Estimated Effects and Coefficients for Shrinkage (coded units)

| Term                          | Effect | Coef   |
|-------------------------------|--------|--------|
| Constant                      |        | 13.188 |
| Flow_Rate                     | -1.125 | -0.562 |
| Inj_Speed                     | -3.625 | -1.812 |
| Inj_Press                     | 0.125  | 0.062  |
| Melt_Temp                     | -1.875 | -0.937 |
| Viscosity                     | -1.875 | -0.938 |
| Screw_Speed                   | -0.125 | -0.062 |
| Flow_Rate*Inj_Speed           | 2.875  | 1.438  |
| Flow_Rate*Inj_Press           | -1.375 | -0.688 |
| Flow_Rate*Melt_Temp           | 1.125  | 0.562  |
| Flow_Rate*Viscosity           | -1.375 | -0.688 |
| Flow_Rate*Screw_Speed         | -5.125 | -2.563 |
| Inj_Speed*Melt_Temp           | -1.875 | -0.937 |
| Inj_Speed*Screw_Speed         | -1.625 | -0.813 |
| Flow_Rate*Inj_Speed*Melt_Temp | -0.875 | -0.438 |
| Flow_Rate*Inj_Press*Melt_Temp | 6.375  | 3.188  |

S = \* PRESS = \*

Analysis of Variance for Shrinkage (coded units)

| Source                        | DF | Seq SS  | Adj SS  | Adj MS  | F | P |
|-------------------------------|----|---------|---------|---------|---|---|
| Main Effects                  | 6  | 85.875  | 85.875  | 14.312  | * | * |
| Flow_Rate                     | 1  | 5.062   | 5.062   | 5.062   | * | * |
| Inj_Speed                     | 1  | 52.562  | 52.562  | 52.562  | * | * |
| Inj_Press                     | 1  | 0.062   | 0.062   | 0.062   | * | * |
| Melt_Temp                     | 1  | 14.062  | 14.062  | 14.062  | * | * |
| Viscosity                     | 1  | 14.062  | 14.062  | 14.062  | * | * |
| Screw_Speed                   | 1  | 0.062   | 0.062   | 0.062   | * | * |
| 2-Way Interactions            | 7  | 182.937 | 182.938 | 26.134  | * | * |
| Flow_Rate*Inj_Speed           | 1  | 33.062  | 33.063  | 33.063  | * | * |
| Flow_Rate*Inj_Press           | 1  | 7.563   | 7.563   | 7.563   | * | * |
| Flow_Rate*Melt_Temp           | 1  | 5.062   | 5.062   | 5.062   | * | * |
| Flow_Rate*Viscosity           | 1  | 7.563   | 7.562   | 7.562   | * | * |
| Flow_Rate*Screw_Speed         | 1  | 105.062 | 105.063 | 105.063 | * | * |
| Inj_Speed*Melt_Temp           | 1  | 14.062  | 14.062  | 14.062  | * | * |
| Inj_Speed*Screw_Speed         | 1  | 10.563  | 10.563  | 10.563  | * | * |
| 3-Way Interactions            | 2  | 165.625 | 165.625 | 82.813  | * | * |
| Flow_Rate*Inj_Speed*Melt_Temp | 1  | 3.063   | 3.063   | 3.063   | * | * |
| Flow_Rate*Inj_Press*Melt_Temp | 1  | 162.563 | 162.563 | 162.563 | * | * |
| Residual Error                | 0  | *       | *       | *       |   |   |

Total 15 434.437

Estimated Coefficients for Shrinkage using data in uncoded units

| Term                          | Coef      |
|-------------------------------|-----------|
| Constant                      | -12335.3  |
| Flow_Rate                     | 5616.90   |
| Inj_Speed                     | 497.377   |
| Inj_Press                     | 1.95481   |
| Melt_Temp                     | -12.0042  |
| Viscosity                     | 74.1925   |
| Screw_Speed                   | 892.960   |
| Flow_Rate*Inj_Speed           | 43.1925   |
| Flow_Rate*Inj_Press           | -69.4836  |
| Flow_Rate*Melt_Temp           | -22.7113  |
| Flow_Rate*Viscosity           | -25.8216  |
| Flow_Rate*Screw_Speed         | -24.0610  |
| Inj_Speed*Melt_Temp           | 0.458498  |
| Inj_Speed*Screw_Speed         | -36.4620  |
| Flow_Rate*Inj_Speed*Melt_Temp | -0.164319 |
| Flow_Rate*Inj_Press*Melt_Temp | 0.299296  |

## Effects Pareto for Shrinkage

Alias Structure

```
I + Flow_Rate*Inj_Speed*Inj_Press*Viscosity +
    Flow_Rate*Melt_Temp*Viscosity*Screw_Speed +
    Inj_Speed*Inj_Press*Melt_Temp*Screw_Speed
Flow_Rate + Inj_Speed*Inj_Press*Viscosity + Melt_Temp*Viscosity*Screw_Speed +
    Flow_Rate*Inj_Speed*Inj_Press*Melt_Temp*Screw_Speed
Inj_Speed + Flow_Rate*Inj_Press*Viscosity + Inj_Press*Melt_Temp*Screw_Speed +
    Flow_Rate*Inj_Speed*Melt_Temp*Viscosity*Screw_Speed
Inj_Press + Flow_Rate*Inj_Speed*Viscosity + Inj_Speed*Melt_Temp*Screw_Speed +
    Flow_Rate*Inj_Press*Melt_Temp*Viscosity*Screw_Speed
Melt_Temp + Flow_Rate*Viscosity*Screw_Speed + Inj_Speed*Inj_Press*Screw_Speed +
    Flow_Rate*Inj_Speed*Inj_Press*Melt_Temp*Viscosity
Viscosity + Flow_Rate*Inj_Speed*Inj_Press + Flow_Rate*Melt_Temp*Screw_Speed +
    Inj_Speed*Inj_Press*Melt_Temp*Viscosity*Screw_Speed
Screw_Speed + Flow_Rate*Melt_Temp*Viscosity + Inj_Speed*Inj_Press*Melt_Temp +
    Flow_Rate*Inj_Speed*Inj_Press*Viscosity*Screw_Speed
Flow_Rate*Inj_Speed + Inj_Press*Viscosity +
    Flow_Rate*Inj_Press*Melt_Temp*Screw_Speed +
    Inj_Speed*Melt_Temp*Viscosity*Screw_Speed
Flow_Rate*Inj_Press + Inj_Speed*Viscosity +
    Flow_Rate*Inj_Speed*Melt_Temp*Screw_Speed +
    Inj_Press*Melt_Temp*Viscosity*Screw_Speed
Flow_Rate*Melt_Temp + Viscosity*Screw_Speed +
    Flow_Rate*Inj_Speed*Inj_Press*Screw_Speed +
    Inj_Speed*Inj_Press*Melt_Temp*Viscosity
Flow_Rate*Viscosity + Inj_Speed*Inj_Press + Melt_Temp*Screw_Speed +
    Flow_Rate*Inj_Speed*Inj_Press*Melt_Temp*Viscosity*Screw_Speed
Flow_Rate*Screw_Speed + Melt_Temp*Viscosity +
    Flow_Rate*Inj_Speed*Inj_Press*Melt_Temp +
    Inj_Speed*Inj_Press*Viscosity*Screw_Speed
Inj_Speed*Melt_Temp + Inj_Press*Screw_Speed +
    Flow_Rate*Inj_Speed*Viscosity*Screw_Speed +
    Flow_Rate*Inj_Press*Melt_Temp*Viscosity
Inj_Speed*Screw_Speed + Inj_Press*Melt_Temp +
    Flow_Rate*Inj_Speed*Melt_Temp*Viscosity +
```

```

Flow_Rate*Inj_Press*Viscosity*Screw_Speed
Flow_Rate*Inj_Speed*Melt_Temp + Flow_Rate*Inj_Press*Screw_Speed +
Inj_Speed*Viscosity*Screw_Speed + Inj_Press*Melt_Temp*Viscosity
Flow_Rate*Inj_Speed*Screw_Speed + Flow_Rate*Inj_Press*Melt_Temp +
Inj_Speed*Melt_Temp*Viscosity + Inj_Press*Viscosity*Screw_Speed

```

Alias Information for Terms in the Model.  
Totally confounded terms were removed from the analysis.

```

I + Flow_Rate*Inj_Speed*Inj_Press*Viscosity +
Flow_Rate*Melt_Temp*Viscosity*Screw_Speed +
Inj_Speed*Inj_Press*Melt_Temp*Screw_Speed
Flow_Rate + Inj_Speed*Inj_Press*Viscosity + Melt_Temp*Viscosity*Screw_Speed +
Flow_Rate*Inj_Speed*Inj_Press*Melt_Temp*Screw_Speed
Inj_Speed + Flow_Rate*Inj_Press*Viscosity + Inj_Press*Melt_Temp*Screw_Speed +
Flow_Rate*Inj_Speed*Melt_Temp*Viscosity*Screw_Speed
Inj_Press + Flow_Rate*Inj_Speed*Viscosity + Inj_Speed*Melt_Temp*Screw_Speed +
Flow_Rate*Inj_Press*Melt_Temp*Viscosity*Screw_Speed
Melt_Temp + Flow_Rate*Viscosity*Screw_Speed + Inj_Speed*Inj_Press*Screw_Speed +
Flow_Rate*Inj_Speed*Inj_Press*Melt_Temp*Viscosity
Viscosity + Flow_Rate*Inj_Speed*Inj_Press + Flow_Rate*Melt_Temp*Screw_Speed +
Inj_Speed*Inj_Press*Melt_Temp*Viscosity*Screw_Speed
Screw_Speed + Flow_Rate*Melt_Temp*Viscosity + Inj_Speed*Inj_Press*Melt_Temp +
Flow_Rate*Inj_Speed*Inj_Press*Viscosity*Screw_Speed
Flow_Rate*Inj_Speed + Inj_Press*Viscosity +
Flow_Rate*Inj_Press*Melt_Temp*Screw_Speed +
Inj_Speed*Melt_Temp*Viscosity*Screw_Speed
Flow_Rate*Inj_Press + Inj_Speed*Viscosity +
Flow_Rate*Inj_Speed*Melt_Temp*Screw_Speed +
Inj_Press*Melt_Temp*Viscosity*Screw_Speed
Flow_Rate*Melt_Temp + Viscosity*Screw_Speed +
Flow_Rate*Inj_Speed*Inj_Press*Screw_Speed +
Inj_Speed*Inj_Press*Melt_Temp*Viscosity
Flow_Rate*Viscosity + Inj_Speed*Inj_Press + Melt_Temp*Screw_Speed +
Flow_Rate*Inj_Speed*Inj_Press*Melt_Temp*Viscosity*Screw_Speed
Flow_Rate*Screw_Speed + Melt_Temp*Viscosity +
Flow_Rate*Inj_Speed*Inj_Press*Melt_Temp +
Inj_Speed*Inj_Press*Viscosity*Screw_Speed
Inj_Speed*Melt_Temp + Inj_Press*Screw_Speed +
Flow_Rate*Inj_Press*Melt_Temp*Viscosity +
Flow_Rate*Inj_Speed*Viscosity*Screw_Speed
Inj_Speed*Screw_Speed + Inj_Press*Melt_Temp +
Flow_Rate*Inj_Speed*Melt_Temp*Viscosity +
Flow_Rate*Inj_Press*Viscosity*Screw_Speed
Flow_Rate*Inj_Speed*Melt_Temp + Flow_Rate*Inj_Press*Screw_Speed +
Inj_Speed*Viscosity*Screw_Speed + Inj_Press*Melt_Temp*Viscosity
Flow_Rate*Inj_Press*Melt_Temp + Flow_Rate*Inj_Speed*Screw_Speed +
Inj_Speed*Melt_Temp*Viscosity + Inj_Press*Viscosity*Screw_Speed

```

## Factorial Fit: Shrinkage versus Flow\_Rate, Inj\_Speed, ...

Estimated Effects and Coefficients for Shrinkage (coded units)

| Term        | Effect | Coef   |
|-------------|--------|--------|
| Constant    |        | 13.313 |
| Flow_Rate   | -1.375 | -0.687 |
| Inj_Speed   | -3.875 | -1.937 |
| Inj_Press   | -0.125 | -0.063 |
| Melt_Temp   | -2.125 | -1.063 |
| Viscosity   | -2.125 | -1.063 |
| Screw_Speed | -0.375 | -0.187 |

|                               |        |        |
|-------------------------------|--------|--------|
| Flow_Rate*Inj_Speed           | 3.125  | 1.562  |
| Flow_Rate*Inj_Press           | -1.125 | -0.563 |
| Flow_Rate*Melt_Temp           | 1.375  | 0.687  |
| Flow_Rate*Viscosity           | -1.125 | -0.562 |
| Flow_Rate*Screw_Speed         | -4.875 | -2.438 |
| Inj_Speed*Melt_Temp           | -1.625 | -0.812 |
| Inj_Speed*Screw_Speed         | -1.375 | -0.687 |
| Flow_Rate*Inj_Speed*Melt_Temp | -1.125 | -0.563 |
| Flow_Rate*Inj_Press*Melt_Temp | 6.125  | 3.063  |

S = \*      PRESS = \*

#### Analysis of Variance for Shrinkage (coded units)

| Source                        | DF | Seq SS  | Adj SS  | Adj MS  | F | P |
|-------------------------------|----|---------|---------|---------|---|---|
| Main Effects                  | 6  | 104.375 | 104.375 | 17.396  | * | * |
| Flow_Rate                     | 1  | 7.563   | 7.562   | 7.562   | * | * |
| Inj_Speed                     | 1  | 60.062  | 60.062  | 60.062  | * | * |
| Inj_Press                     | 1  | 0.063   | 0.063   | 0.063   | * | * |
| Melt_Temp                     | 1  | 18.063  | 18.063  | 18.063  | * | * |
| Viscosity                     | 1  | 18.063  | 18.063  | 18.063  | * | * |
| Screw_Speed                   | 1  | 0.562   | 0.562   | 0.562   | * | * |
| 2-Way Interactions            | 7  | 169.937 | 169.938 | 24.277  | * | * |
| Flow_Rate*Inj_Speed           | 1  | 39.062  | 39.062  | 39.062  | * | * |
| Flow_Rate*Inj_Press           | 1  | 5.063   | 5.063   | 5.063   | * | * |
| Flow_Rate*Melt_Temp           | 1  | 7.562   | 7.562   | 7.562   | * | * |
| Flow_Rate*Viscosity           | 1  | 5.063   | 5.062   | 5.062   | * | * |
| Flow_Rate*Screw_Speed         | 1  | 95.063  | 95.063  | 95.063  | * | * |
| Inj_Speed*Melt_Temp           | 1  | 10.562  | 10.562  | 10.562  | * | * |
| Inj_Speed*Screw_Speed         | 1  | 7.562   | 7.562   | 7.562   | * | * |
| 3-Way Interactions            | 2  | 155.125 | 155.125 | 77.563  | * | * |
| Flow_Rate*Inj_Speed*Melt_Temp | 1  | 5.063   | 5.063   | 5.063   | * | * |
| Flow_Rate*Inj_Press*Melt_Temp | 1  | 150.063 | 150.063 | 150.063 | * | * |
| Residual Error                | 0  | *       | *       | *       |   |   |
| Total                         | 15 | 429.437 |         |         |   |   |

#### Estimated Coefficients for Shrinkage using data in uncoded units

| Term                          | Coef      |
|-------------------------------|-----------|
| Constant                      | -10768.3  |
| Flow_Rate                     | 5052.11   |
| Inj_Speed                     | 437.224   |
| Inj_Press                     | 1.58803   |
| Melt_Temp                     | -15.6721  |
| Viscosity                     | 59.5211   |
| Screw_Speed                   | 856.282   |
| Flow_Rate*Inj_Speed           | 54.4601   |
| Flow_Rate*Inj_Press           | -66.6667  |
| Flow_Rate*Melt_Temp           | -20.4812  |
| Flow_Rate*Viscosity           | -21.1268  |
| Flow_Rate*Screw_Speed         | -22.8873  |
| Inj_Speed*Melt_Temp           | 0.605211  |
| Inj_Speed*Screw_Speed         | -34.9948  |
| Flow_Rate*Inj_Speed*Melt_Temp | -0.211268 |
| Flow_Rate*Inj_Press*Melt_Temp | 0.287559  |

#### Effects Pareto for Shrinkage

Alias Structure

```
I + Flow_Rate*Inj_Speed*Inj_Press*Viscosity +
    Flow_Rate*Melt_Temp*Viscosity*Screw_Speed +
    Inj_Speed*Inj_Press*Melt_Temp*Screw_Speed
Flow_Rate + Inj_Speed*Inj_Press*Viscosity + Melt_Temp*Viscosity*Screw_Speed +
    Flow_Rate*Inj_Speed*Inj_Press*Melt_Temp*Screw_Speed
Inj_Speed + Flow_Rate*Inj_Press*Viscosity + Inj_Press*Melt_Temp*Screw_Speed +
    Flow_Rate*Inj_Speed*Melt_Temp*Viscosity*Screw_Speed
Inj_Press + Flow_Rate*Inj_Speed*Viscosity + Inj_Speed*Melt_Temp*Screw_Speed +
    Flow_Rate*Inj_Press*Melt_Temp*Viscosity*Screw_Speed
Melt_Temp + Flow_Rate*Viscosity*Screw_Speed + Inj_Speed*Inj_Press*Screw_Speed +
    Flow_Rate*Inj_Speed*Inj_Press*Melt_Temp*Viscosity
Viscosity + Flow_Rate*Inj_Speed*Inj_Press + Flow_Rate*Melt_Temp*Screw_Speed +
    Inj_Speed*Inj_Press*Melt_Temp*Viscosity*Screw_Speed
Screw_Speed + Flow_Rate*Melt_Temp*Viscosity + Inj_Speed*Inj_Press*Melt_Temp +
    Flow_Rate*Inj_Speed*Inj_Press*Viscosity*Screw_Speed
Flow_Rate*Inj_Speed + Inj_Press*Viscosity +
    Flow_Rate*Inj_Press*Melt_Temp*Screw_Speed +
    Inj_Speed*Melt_Temp*Viscosity*Screw_Speed
Flow_Rate*Inj_Press + Inj_Speed*Viscosity +
    Flow_Rate*Inj_Speed*Melt_Temp*Screw_Speed +
    Inj_Press*Melt_Temp*Viscosity*Screw_Speed
Flow_Rate*Melt_Temp + Viscosity*Screw_Speed +
    Flow_Rate*Inj_Speed*Inj_Press*Screw_Speed +
    Inj_Speed*Inj_Press*Melt_Temp*Viscosity
Flow_Rate*Viscosity + Inj_Speed*Inj_Press + Melt_Temp*Screw_Speed +
    Flow_Rate*Inj_Speed*Inj_Press*Melt_Temp*Viscosity*Screw_Speed
Flow_Rate*Screw_Speed + Melt_Temp*Viscosity +
    Flow_Rate*Inj_Speed*Inj_Press*Melt_Temp +
    Inj_Speed*Inj_Press*Viscosity*Screw_Speed
Inj_Speed*Melt_Temp + Inj_Press*Screw_Speed +
    Flow_Rate*Inj_Speed*Viscosity*Screw_Speed +
    Flow_Rate*Inj_Press*Melt_Temp*Viscosity
Inj_Speed*Screw_Speed + Inj_Press*Melt_Temp +
    Flow_Rate*Inj_Speed*Melt_Temp*Viscosity +
    Flow_Rate*Inj_Press*Viscosity*Screw_Speed
Flow_Rate*Inj_Speed*Melt_Temp + Flow_Rate*Inj_Press*Screw_Speed +
    Inj_Speed*Viscosity*Screw_Speed + Inj_Press*Melt_Temp*Viscosity
Flow_Rate*Inj_Speed*Screw_Speed + Flow_Rate*Inj_Press*Melt_Temp +
    Inj_Speed*Melt_Temp*Viscosity + Inj_Press*Viscosity*Screw_Speed
```

Alias Information for Terms in the Model.

Totally confounded terms were removed from the analysis.

```
I + Flow_Rate*Inj_Speed*Inj_Press*Viscosity +
    Flow_Rate*Melt_Temp*Viscosity*Screw_Speed +
    Inj_Speed*Inj_Press*Melt_Temp*Screw_Speed
Flow_Rate + Inj_Speed*Inj_Press*Viscosity + Melt_Temp*Viscosity*Screw_Speed +
    Flow_Rate*Inj_Speed*Inj_Press*Melt_Temp*Screw_Speed
Inj_Speed + Flow_Rate*Inj_Press*Viscosity + Inj_Press*Melt_Temp*Screw_Speed +
    Flow_Rate*Inj_Speed*Melt_Temp*Viscosity*Screw_Speed
Inj_Press + Flow_Rate*Inj_Speed*Viscosity + Inj_Speed*Melt_Temp*Screw_Speed +
    Flow_Rate*Inj_Press*Melt_Temp*Viscosity*Screw_Speed
Melt_Temp + Flow_Rate*Viscosity*Screw_Speed + Inj_Speed*Inj_Press*Screw_Speed +
    Flow_Rate*Inj_Speed*Inj_Press*Melt_Temp*Viscosity
Viscosity + Flow_Rate*Inj_Speed*Inj_Press + Flow_Rate*Melt_Temp*Screw_Speed +
    Inj_Speed*Inj_Press*Melt_Temp*Viscosity*Screw_Speed
Screw_Speed + Flow_Rate*Melt_Temp*Viscosity + Inj_Speed*Inj_Press*Melt_Temp +
    Flow_Rate*Inj_Speed*Inj_Press*Viscosity*Screw_Speed
Flow_Rate*Inj_Speed + Inj_Press*Viscosity +
    Flow_Rate*Inj_Press*Melt_Temp*Screw_Speed +
```

```

      Inj_Speed*Melt_Temp*Viscosity*Screw_Speed
Flow_Rate*Inj_Press + Inj_Speed*Viscosity +
      Flow_Rate*Inj_Speed*Melt_Temp*Screw_Speed +
      Inj_Press*Melt_Temp*Viscosity*Screw_Speed
Flow_Rate*Melt_Temp + Viscosity*Screw_Speed +
      Flow_Rate*Inj_Speed*Inj_Press*Screw_Speed +
      Inj_Speed*Inj_Press*Melt_Temp*Viscosity
Flow_Rate*Viscosity + Inj_Speed*Inj_Press + Melt_Temp*Screw_Speed +
      Flow_Rate*Inj_Speed*Inj_Press*Melt_Temp*Viscosity*Screw_Speed
Flow_Rate*Screw_Speed + Melt_Temp*Viscosity +
      Flow_Rate*Inj_Speed*Inj_Press*Melt_Temp +
      Inj_Speed*Inj_Press*Viscosity*Screw_Speed
Inj_Speed*Melt_Temp + Inj_Press*Screw_Speed +
      Flow_Rate*Inj_Press*Melt_Temp*Viscosity +
      Flow_Rate*Inj_Speed*Viscosity*Screw_Speed
Inj_Speed*Screw_Speed + Inj_Press*Melt_Temp +
      Flow_Rate*Inj_Speed*Melt_Temp*Viscosity +
      Flow_Rate*Inj_Press*Viscosity*Screw_Speed
Flow_Rate*Inj_Speed*Melt_Temp + Flow_Rate*Inj_Press*Screw_Speed +
      Inj_Speed*Viscosity*Screw_Speed + Inj_Press*Melt_Temp*Viscosity
Flow_Rate*Inj_Press*Melt_Temp + Flow_Rate*Inj_Speed*Screw_Speed +
      Inj_Speed*Melt_Temp*Viscosity + Inj_Press*Viscosity*Screw_Speed

```

## Factorial Fit: Shrinkage versus Flow\_Rate, Inj\_Speed, ...

Estimated Effects and Coefficients for Shrinkage (coded units)

| Term                          | Effect | Coef   |
|-------------------------------|--------|--------|
| Constant                      |        | 13.375 |
| Flow_Rate                     | -1.250 | -0.625 |
| Inj_Speed                     | -3.750 | -1.875 |
| Inj_Press                     | -0.000 | -0.000 |
| Melt_Temp                     | -2.250 | -1.125 |
| Viscosity                     | -2.000 | -1.000 |
| Screw_Speed                   | -0.500 | -0.250 |
| Flow_Rate*Inj_Speed           | 3.250  | 1.625  |
| Flow_Rate*Inj_Press           | -1.000 | -0.500 |
| Flow_Rate*Melt_Temp           | 1.250  | 0.625  |
| Flow_Rate*Viscosity           | -1.000 | -0.500 |
| Flow_Rate*Screw_Speed         | -5.000 | -2.500 |
| Inj_Speed*Melt_Temp           | -1.750 | -0.875 |
| Inj_Speed*Screw_Speed         | -1.500 | -0.750 |
| Flow_Rate*Inj_Speed*Melt_Temp | -1.250 | -0.625 |
| Flow_Rate*Inj_Press*Melt_Temp | 6.000  | 3.000  |

S = \* PRESS = \*

Analysis of Variance for Shrinkage (coded units)

| Source              | DF | Seq SS  | Adj SS  | Adj MS | F | P |
|---------------------|----|---------|---------|--------|---|---|
| Main Effects        | 6  | 99.750  | 99.750  | 16.625 | * | * |
| Flow_Rate           | 1  | 6.250   | 6.250   | 6.250  | * | * |
| Inj_Speed           | 1  | 56.250  | 56.250  | 56.250 | * | * |
| Inj_Press           | 1  | 0.000   | 0.000   | 0.000  | * | * |
| Melt_Temp           | 1  | 20.250  | 20.250  | 20.250 | * | * |
| Viscosity           | 1  | 16.000  | 16.000  | 16.000 | * | * |
| Screw_Speed         | 1  | 1.000   | 1.000   | 1.000  | * | * |
| 2-Way Interactions  | 7  | 177.750 | 177.750 | 25.393 | * | * |
| Flow_Rate*Inj_Speed | 1  | 42.250  | 42.250  | 42.250 | * | * |
| Flow_Rate*Inj_Press | 1  | 4.000   | 4.000   | 4.000  | * | * |

|                               |    |         |         |         |   |   |
|-------------------------------|----|---------|---------|---------|---|---|
| Flow_Rate*Melt_Temp           | 1  | 6.250   | 6.250   | 6.250   | * | * |
| Flow_Rate*Viscosity           | 1  | 4.000   | 4.000   | 4.000   | * | * |
| Flow_Rate*Screw_Speed         | 1  | 100.000 | 100.000 | 100.000 | * | * |
| Inj_Speed*Melt_Temp           | 1  | 12.250  | 12.250  | 12.250  | * | * |
| Inj_Speed*Screw_Speed         | 1  | 9.000   | 9.000   | 9.000   | * | * |
| 3-Way Interactions            | 2  | 150.250 | 150.250 | 75.125  | * | * |
| Flow_Rate*Inj_Speed*Melt_Temp | 1  | 6.250   | 6.250   | 6.250   | * | * |
| Flow_Rate*Inj_Press*Melt_Temp | 1  | 144.000 | 144.000 | 144.000 | * | * |
| Residual Error                | 0  | *       | *       | *       |   |   |
| Total                         | 15 | 427.750 |         |         |   |   |

Estimated Coefficients for Shrinkage using data in uncoded units

| Term                          | Coef      |
|-------------------------------|-----------|
| Constant                      | -10178.4  |
| Flow_Rate                     | 4817.84   |
| Inj_Speed                     | 409.198   |
| Inj_Press                     | 1.41714   |
| Melt_Temp                     | -17.0392  |
| Viscosity                     | 52.6854   |
| Screw_Speed                   | 842.610   |
| Flow_Rate*Inj_Speed           | 60.0939   |
| Flow_Rate*Inj_Press           | -65.2582  |
| Flow_Rate*Melt_Temp           | -19.4836  |
| Flow_Rate*Viscosity           | -18.7793  |
| Flow_Rate*Screw_Speed         | -23.4742  |
| Inj_Speed*Melt_Temp           | 0.673568  |
| Inj_Speed*Screw_Speed         | -34.3113  |
| Flow_Rate*Inj_Speed*Melt_Temp | -0.234742 |
| Flow_Rate*Inj_Press*Melt_Temp | 0.281690  |

## Effects Pareto for Shrinkage

Alias Structure

```

I + Flow_Rate*Inj_Speed*Inj_Press*Viscosity +
    Flow_Rate*Melt_Temp*Viscosity*Screw_Speed +
    Inj_Speed*Inj_Press*Melt_Temp*Screw_Speed
Flow_Rate + Inj_Speed*Inj_Press*Viscosity + Melt_Temp*Viscosity*Screw_Speed +
    Flow_Rate*Inj_Speed*Inj_Press*Melt_Temp*Screw_Speed
Inj_Speed + Flow_Rate*Inj_Press*Viscosity + Inj_Press*Melt_Temp*Screw_Speed +
    Flow_Rate*Inj_Speed*Melt_Temp*Viscosity*Screw_Speed
Inj_Press + Flow_Rate*Inj_Speed*Viscosity + Inj_Speed*Melt_Temp*Screw_Speed +
    Flow_Rate*Inj_Press*Melt_Temp*Viscosity*Screw_Speed
Melt_Temp + Flow_Rate*Viscosity*Screw_Speed + Inj_Speed*Inj_Press*Screw_Speed +
    Flow_Rate*Inj_Speed*Inj_Press*Melt_Temp*Viscosity
Viscosity + Flow_Rate*Inj_Speed*Inj_Press + Flow_Rate*Melt_Temp*Screw_Speed +
    Inj_Speed*Inj_Press*Melt_Temp*Viscosity*Screw_Speed
Screw_Speed + Flow_Rate*Melt_Temp*Viscosity + Inj_Speed*Inj_Press*Melt_Temp +
    Flow_Rate*Inj_Speed*Inj_Press*Viscosity*Screw_Speed
Flow_Rate*Inj_Speed + Inj_Press*Viscosity +
    Flow_Rate*Inj_Press*Melt_Temp*Screw_Speed +
    Inj_Speed*Melt_Temp*Viscosity*Screw_Speed
Flow_Rate*Inj_Press + Inj_Speed*Viscosity +
    Flow_Rate*Inj_Speed*Melt_Temp*Screw_Speed +
    Inj_Press*Melt_Temp*Viscosity*Screw_Speed
Flow_Rate*Melt_Temp + Viscosity*Screw_Speed +
    Flow_Rate*Inj_Speed*Inj_Press*Screw_Speed +
    Inj_Speed*Inj_Press*Melt_Temp*Viscosity
Flow_Rate*Viscosity + Inj_Speed*Inj_Press + Melt_Temp*Screw_Speed +

```



```

Flow_Rate*Inj_Speed*Inj_Press*Melt_Temp*Viscosity*Screw_Speed
Flow_Rate*Screw_Speed + Melt_Temp*Viscosity +
Flow_Rate*Inj_Speed*Inj_Press*Melt_Temp +
Inj_Speed*Inj_Press*Viscosity*Screw_Speed
Inj_Speed*Melt_Temp + Inj_Press*Screw_Speed +
Flow_Rate*Inj_Speed*Viscosity*Screw_Speed +
Flow_Rate*Inj_Press*Melt_Temp*Viscosity
Inj_Speed*Screw_Speed + Inj_Press*Melt_Temp +
Flow_Rate*Inj_Speed*Melt_Temp*Viscosity +
Flow_Rate*Inj_Press*Viscosity*Screw_Speed
Flow_Rate*Inj_Speed*Melt_Temp + Flow_Rate*Inj_Press*Screw_Speed +
Inj_Speed*Viscosity*Screw_Speed + Inj_Press*Melt_Temp*Viscosity
Flow_Rate*Inj_Speed*Screw_Speed + Flow_Rate*Inj_Press*Melt_Temp +
Inj_Speed*Melt_Temp*Viscosity + Inj_Press*Viscosity*Screw_Speed

```

Alias Information for Terms in the Model.  
 Totally confounded terms were removed from the analysis.

```

I + Flow_Rate*Inj_Speed*Inj_Press*Viscosity +
Flow_Rate*Melt_Temp*Viscosity*Screw_Speed +
Inj_Speed*Inj_Press*Melt_Temp*Screw_Speed
Flow_Rate + Inj_Speed*Inj_Press*Viscosity + Melt_Temp*Viscosity*Screw_Speed +
Flow_Rate*Inj_Speed*Inj_Press*Melt_Temp*Screw_Speed
Inj_Speed + Flow_Rate*Inj_Press*Viscosity + Inj_Press*Melt_Temp*Screw_Speed +
Flow_Rate*Inj_Speed*Melt_Temp*Viscosity*Screw_Speed
Inj_Press + Flow_Rate*Inj_Speed*Viscosity + Inj_Speed*Melt_Temp*Screw_Speed +
Flow_Rate*Inj_Press*Melt_Temp*Viscosity*Screw_Speed
Melt_Temp + Flow_Rate*Viscosity*Screw_Speed + Inj_Speed*Inj_Press*Screw_Speed +
Flow_Rate*Inj_Speed*Inj_Press*Melt_Temp*Viscosity
Viscosity + Flow_Rate*Inj_Speed*Inj_Press + Flow_Rate*Melt_Temp*Screw_Speed +
Inj_Speed*Inj_Press*Melt_Temp*Viscosity*Screw_Speed
Screw_Speed + Flow_Rate*Melt_Temp*Viscosity + Inj_Speed*Inj_Press*Melt_Temp +
Flow_Rate*Inj_Speed*Inj_Press*Viscosity*Screw_Speed
Flow_Rate*Inj_Speed + Inj_Press*Viscosity +
Flow_Rate*Inj_Press*Melt_Temp*Screw_Speed +
Inj_Speed*Melt_Temp*Viscosity*Screw_Speed
Flow_Rate*Inj_Press + Inj_Speed*Viscosity +
Flow_Rate*Inj_Speed*Melt_Temp*Screw_Speed +
Inj_Press*Melt_Temp*Viscosity*Screw_Speed
Flow_Rate*Melt_Temp + Viscosity*Screw_Speed +
Flow_Rate*Inj_Speed*Inj_Press*Screw_Speed +
Inj_Speed*Inj_Press*Melt_Temp*Viscosity
Flow_Rate*Viscosity + Inj_Speed*Inj_Press + Melt_Temp*Screw_Speed +
Flow_Rate*Inj_Speed*Inj_Press*Melt_Temp*Viscosity*Screw_Speed
Flow_Rate*Screw_Speed + Melt_Temp*Viscosity +
Flow_Rate*Inj_Speed*Inj_Press*Melt_Temp +
Inj_Speed*Inj_Press*Viscosity*Screw_Speed
Inj_Speed*Melt_Temp + Inj_Press*Screw_Speed +
Flow_Rate*Inj_Press*Melt_Temp*Viscosity +
Flow_Rate*Inj_Speed*Viscosity*Screw_Speed
Inj_Speed*Screw_Speed + Inj_Press*Melt_Temp +
Flow_Rate*Inj_Speed*Melt_Temp*Viscosity +
Flow_Rate*Inj_Press*Viscosity*Screw_Speed
Flow_Rate*Inj_Speed*Melt_Temp + Flow_Rate*Inj_Press*Screw_Speed +
Inj_Speed*Viscosity*Screw_Speed + Inj_Press*Melt_Temp*Viscosity
Flow_Rate*Inj_Press*Melt_Temp + Flow_Rate*Inj_Speed*Screw_Speed +
Inj_Speed*Melt_Temp*Viscosity + Inj_Press*Viscosity*Screw_Speed

```

## Factorial Fit: Shrinkage versus Flow\_Rate, Inj\_Speed, ...

Estimated Effects and Coefficients for Shrinkage (coded units)

| Term                          | Effect | Coef   |
|-------------------------------|--------|--------|
| Constant                      |        | 13.063 |
| Flow_Rate                     | -0.625 | -0.312 |
| Inj_Speed                     | -3.125 | -1.562 |
| Inj_Press                     | -0.625 | -0.313 |
| Melt_Temp                     | -2.875 | -1.437 |
| Viscosity                     | -2.625 | -1.313 |
| Screw_Speed                   | 0.125  | 0.063  |
| Flow_Rate*Inj_Speed           | 2.625  | 1.312  |
| Flow_Rate*Inj_Press           | -0.375 | -0.188 |
| Flow_Rate*Melt_Temp           | 1.875  | 0.938  |
| Flow_Rate*Viscosity           | -0.375 | -0.187 |
| Flow_Rate*Screw_Speed         | -5.625 | -2.813 |
| Inj_Speed*Melt_Temp           | -1.125 | -0.563 |
| Inj_Speed*Screw_Speed         | -2.125 | -1.063 |
| Flow_Rate*Inj_Speed*Melt_Temp | -1.875 | -0.938 |
| Flow_Rate*Inj_Press*Melt_Temp | 6.625  | 3.312  |

S = \*      PRESS = \*

#### Analysis of Variance for Shrinkage (coded units)

| Source                        | DF | Seq SS  | Adj SS  | Adj MS  | F | P |
|-------------------------------|----|---------|---------|---------|---|---|
| Main Effects                  | 6  | 102.875 | 102.875 | 17.146  | * | * |
| Flow_Rate                     | 1  | 1.563   | 1.562   | 1.562   | * | * |
| Inj_Speed                     | 1  | 39.062  | 39.062  | 39.062  | * | * |
| Inj_Press                     | 1  | 1.563   | 1.563   | 1.563   | * | * |
| Melt_Temp                     | 1  | 33.062  | 33.062  | 33.062  | * | * |
| Viscosity                     | 1  | 27.563  | 27.563  | 27.563  | * | * |
| Screw_Speed                   | 1  | 0.063   | 0.063   | 0.063   | * | * |
| 2-Way Interactions            | 7  | 192.437 | 192.437 | 27.491  | * | * |
| Flow_Rate*Inj_Speed           | 1  | 27.562  | 27.562  | 27.562  | * | * |
| Flow_Rate*Inj_Press           | 1  | 0.563   | 0.563   | 0.563   | * | * |
| Flow_Rate*Melt_Temp           | 1  | 14.062  | 14.063  | 14.063  | * | * |
| Flow_Rate*Viscosity           | 1  | 0.563   | 0.562   | 0.562   | * | * |
| Flow_Rate*Screw_Speed         | 1  | 126.562 | 126.563 | 126.563 | * | * |
| Inj_Speed*Melt_Temp           | 1  | 5.063   | 5.063   | 5.063   | * | * |
| Inj_Speed*Screw_Speed         | 1  | 18.062  | 18.063  | 18.063  | * | * |
| 3-Way Interactions            | 2  | 189.625 | 189.625 | 94.812  | * | * |
| Flow_Rate*Inj_Speed*Melt_Temp | 1  | 14.063  | 14.063  | 14.063  | * | * |
| Flow_Rate*Inj_Press*Melt_Temp | 1  | 175.562 | 175.562 | 175.562 | * | * |
| Residual Error                | 0  | *       | *       | *       |   |   |
| Total                         | 15 | 484.937 |         |         |   |   |

#### Estimated Coefficients for Shrinkage using data in uncoded units

| Term                  | Coef     |
|-----------------------|----------|
| Constant              | -9562.23 |
| Flow_Rate             | 4779.11  |
| Inj_Speed             | 390.859  |
| Inj_Press             | 0.500176 |
| Melt_Temp             | -26.2088 |
| Viscosity             | 16.0070  |
| Screw_Speed           | 934.306  |
| Flow_Rate*Inj_Speed   | 85.9155  |
| Flow_Rate*Inj_Press   | -71.7136 |
| Flow_Rate*Melt_Temp   | -19.1901 |
| Flow_Rate*Viscosity   | -7.04225 |
| Flow_Rate*Screw_Speed | -26.4085 |

|                               |           |
|-------------------------------|-----------|
| Inj_Speed*Melt_Temp           | 1.04035   |
| Inj_Speed*Screw_Speed         | -37.9791  |
| Flow_Rate*Inj_Speed*Melt_Temp | -0.352113 |
| Flow_Rate*Inj_Press*Melt_Temp | 0.311033  |

## Effects Pareto for Shrinkage

Alias Structure

```

I + Flow_Rate*Inj_Speed*Inj_Press*Viscosity +
    Flow_Rate*Melt_Temp*Viscosity*Screw_Speed +
    Inj_Speed*Inj_Press*Melt_Temp*Screw_Speed
Flow_Rate + Inj_Speed*Inj_Press*Viscosity + Melt_Temp*Viscosity*Screw_Speed +
    Flow_Rate*Inj_Speed*Inj_Press*Melt_Temp*Screw_Speed
Inj_Speed + Flow_Rate*Inj_Press*Viscosity + Inj_Press*Melt_Temp*Screw_Speed +
    Flow_Rate*Inj_Speed*Melt_Temp*Viscosity*Screw_Speed
Inj_Press + Flow_Rate*Inj_Speed*Viscosity + Inj_Speed*Melt_Temp*Screw_Speed +
    Flow_Rate*Inj_Press*Melt_Temp*Viscosity*Screw_Speed
Melt_Temp + Flow_Rate*Viscosity*Screw_Speed + Inj_Speed*Inj_Press*Screw_Speed +
    Flow_Rate*Inj_Speed*Inj_Press*Melt_Temp*Viscosity
Viscosity + Flow_Rate*Inj_Speed*Inj_Press + Flow_Rate*Melt_Temp*Screw_Speed +
    Inj_Speed*Inj_Press*Melt_Temp*Viscosity*Screw_Speed
Screw_Speed + Flow_Rate*Melt_Temp*Viscosity + Inj_Speed*Inj_Press*Melt_Temp +
    Flow_Rate*Inj_Speed*Inj_Press*Viscosity*Screw_Speed
Flow_Rate*Inj_Speed + Inj_Press*Viscosity +
    Flow_Rate*Inj_Press*Melt_Temp*Screw_Speed +
    Inj_Speed*Melt_Temp*Viscosity*Screw_Speed
Flow_Rate*Inj_Press + Inj_Speed*Viscosity +
    Flow_Rate*Inj_Speed*Melt_Temp*Screw_Speed +
    Inj_Press*Melt_Temp*Viscosity*Screw_Speed
Flow_Rate*Melt_Temp + Viscosity*Screw_Speed +
    Flow_Rate*Inj_Speed*Inj_Press*Screw_Speed +
    Inj_Speed*Inj_Press*Melt_Temp*Viscosity
Flow_Rate*Viscosity + Inj_Speed*Inj_Press + Melt_Temp*Screw_Speed +
    Flow_Rate*Inj_Speed*Inj_Press*Melt_Temp*Viscosity*Screw_Speed
Flow_Rate*Screw_Speed + Melt_Temp*Viscosity +
    Flow_Rate*Inj_Speed*Inj_Press*Melt_Temp +
    Inj_Speed*Inj_Press*Viscosity*Screw_Speed
Inj_Speed*Melt_Temp + Inj_Press*Screw_Speed +
    Flow_Rate*Inj_Speed*Viscosity*Screw_Speed +
    Flow_Rate*Inj_Press*Melt_Temp*Viscosity
Inj_Speed*Screw_Speed + Inj_Press*Melt_Temp +
    Flow_Rate*Inj_Speed*Melt_Temp*Viscosity +
    Flow_Rate*Inj_Press*Viscosity*Screw_Speed
Flow_Rate*Inj_Speed*Melt_Temp + Flow_Rate*Inj_Press*Screw_Speed +
    Inj_Speed*Viscosity*Screw_Speed + Inj_Press*Melt_Temp*Viscosity
Flow_Rate*Inj_Speed*Screw_Speed + Flow_Rate*Inj_Press*Melt_Temp +
    Inj_Speed*Melt_Temp*Viscosity + Inj_Press*Viscosity*Screw_Speed

```

Alias Information for Terms in the Model.

Totally confounded terms were removed from the analysis.

```

I + Flow_Rate*Inj_Speed*Inj_Press*Viscosity +
    Flow_Rate*Melt_Temp*Viscosity*Screw_Speed +
    Inj_Speed*Inj_Press*Melt_Temp*Screw_Speed
Flow_Rate + Inj_Speed*Inj_Press*Viscosity + Melt_Temp*Viscosity*Screw_Speed +
    Flow_Rate*Inj_Speed*Inj_Press*Melt_Temp*Screw_Speed
Inj_Speed + Flow_Rate*Inj_Press*Viscosity + Inj_Press*Melt_Temp*Screw_Speed +
    Flow_Rate*Inj_Speed*Melt_Temp*Viscosity*Screw_Speed
Inj_Press + Flow_Rate*Inj_Speed*Viscosity + Inj_Speed*Melt_Temp*Screw_Speed +

```

```

Flow_Rate*Inj_Press*Melt_Temp*Viscosity*Screw_Speed
Melt_Temp + Flow_Rate*Viscosity*Screw_Speed + Inj_Speed*Inj_Press*Screw_Speed +
Flow_Rate*Inj_Speed*Inj_Press*Melt_Temp*Viscosity
Viscosity + Flow_Rate*Inj_Speed*Inj_Press + Flow_Rate*Melt_Temp*Screw_Speed +
Inj_Speed*Inj_Press*Melt_Temp*Viscosity*Screw_Speed
Screw_Speed + Flow_Rate*Melt_Temp*Viscosity + Inj_Speed*Inj_Press*Melt_Temp +
Flow_Rate*Inj_Speed*Inj_Press*Viscosity*Screw_Speed
Flow_Rate*Inj_Speed + Inj_Press*Viscosity +
Flow_Rate*Inj_Press*Melt_Temp*Screw_Speed +
Inj_Speed*Melt_Temp*Viscosity*Screw_Speed
Flow_Rate*Inj_Press + Inj_Speed*Viscosity +
Flow_Rate*Inj_Speed*Inj_Press*Melt_Temp*Screw_Speed +
Inj_Press*Melt_Temp*Viscosity*Screw_Speed
Flow_Rate*Melt_Temp + Viscosity*Screw_Speed +
Flow_Rate*Inj_Speed*Inj_Press*Screw_Speed +
Inj_Speed*Inj_Press*Melt_Temp*Viscosity
Flow_Rate*Viscosity + Inj_Speed*Inj_Press + Melt_Temp*Screw_Speed +
Flow_Rate*Inj_Speed*Inj_Press*Melt_Temp*Viscosity*Screw_Speed
Flow_Rate*Screw_Speed + Melt_Temp*Viscosity +
Flow_Rate*Inj_Speed*Inj_Press*Melt_Temp +
Inj_Speed*Inj_Press*Viscosity*Screw_Speed
Inj_Speed*Melt_Temp + Inj_Press*Screw_Speed +
Flow_Rate*Inj_Press*Melt_Temp*Viscosity +
Flow_Rate*Inj_Speed*Viscosity*Screw_Speed
Inj_Speed*Screw_Speed + Inj_Press*Melt_Temp +
Flow_Rate*Inj_Speed*Melt_Temp*Viscosity +
Flow_Rate*Inj_Press*Viscosity*Screw_Speed
Flow_Rate*Inj_Speed*Melt_Temp + Flow_Rate*Inj_Press*Screw_Speed +
Inj_Speed*Viscosity*Screw_Speed + Inj_Press*Melt_Temp*Viscosity
Flow_Rate*Inj_Press*Melt_Temp + Flow_Rate*Inj_Speed*Screw_Speed +
Inj_Speed*Melt_Temp*Viscosity + Inj_Press*Viscosity*Screw_Speed

```

## Factorial Fit: Shrinkage versus Flow\_Rate, Inj\_Speed, ...

Estimated Effects and Coefficients for Shrinkage (coded units)

| Term                          | Effect | Coef   |
|-------------------------------|--------|--------|
| Constant                      |        | 13.313 |
| Flow_Rate                     | -1.125 | -0.562 |
| Inj_Speed                     | -3.625 | -1.812 |
| Inj_Press                     | -0.125 | -0.063 |
| Melt_Temp                     | -2.375 | -1.187 |
| Viscosity                     | -2.125 | -1.063 |
| Screw_Speed                   | -0.375 | -0.187 |
| Flow_Rate*Inj_Speed           | 3.125  | 1.562  |
| Flow_Rate*Inj_Press           | -0.875 | -0.438 |
| Flow_Rate*Melt_Temp           | 1.375  | 0.688  |
| Flow_Rate*Viscosity           | -0.875 | -0.437 |
| Flow_Rate*Screw_Speed         | -5.125 | -2.563 |
| Inj_Speed*Melt_Temp           | -1.625 | -0.813 |
| Inj_Speed*Screw_Speed         | -1.625 | -0.813 |
| Flow_Rate*Inj_Speed*Melt_Temp | -1.375 | -0.688 |
| Flow_Rate*Inj_Press*Melt_Temp | 6.125  | 3.063  |

S = \* PRESS = \*

Analysis of Variance for Shrinkage (coded units)

| Source       | DF | Seq SS | Adj SS | Adj MS | F | P |
|--------------|----|--------|--------|--------|---|---|
| Main Effects | 6  | 98.875 | 98.875 | 16.479 | * | * |

|                               |    |         |         |         |   |   |
|-------------------------------|----|---------|---------|---------|---|---|
| Flow_Rate                     | 1  | 5.062   | 5.062   | 5.062   | * | * |
| Inj_Speed                     | 1  | 52.562  | 52.562  | 52.562  | * | * |
| Inj_Press                     | 1  | 0.063   | 0.062   | 0.062   | * | * |
| Melt_Temp                     | 1  | 22.562  | 22.563  | 22.563  | * | * |
| Viscosity                     | 1  | 18.062  | 18.063  | 18.063  | * | * |
| Screw_Speed                   | 1  | 0.562   | 0.562   | 0.562   | * | * |
| 2-Way Interactions            | 7  | 178.937 | 178.937 | 25.562  | * | * |
| Flow_Rate*Inj_Speed           | 1  | 39.062  | 39.062  | 39.062  | * | * |
| Flow_Rate*Inj_Press           | 1  | 3.063   | 3.063   | 3.063   | * | * |
| Flow_Rate*Melt_Temp           | 1  | 7.562   | 7.562   | 7.562   | * | * |
| Flow_Rate*Viscosity           | 1  | 3.063   | 3.062   | 3.062   | * | * |
| Flow_Rate*Screw_Speed         | 1  | 105.062 | 105.063 | 105.063 | * | * |
| Inj_Speed*Melt_Temp           | 1  | 10.563  | 10.563  | 10.563  | * | * |
| Inj_Speed*Screw_Speed         | 1  | 10.562  | 10.562  | 10.562  | * | * |
| 3-Way Interactions            | 2  | 157.625 | 157.625 | 78.813  | * | * |
| Flow_Rate*Inj_Speed*Melt_Temp | 1  | 7.563   | 7.563   | 7.563   | * | * |
| Flow_Rate*Inj_Press*Melt_Temp | 1  | 150.063 | 150.063 | 150.063 | * | * |
| Residual Error                | 0  | *       | *       | *       |   |   |
| Total                         | 15 | 435.437 |         |         |   |   |

Estimated Coefficients for Shrinkage using data in uncoded units

| Term                          | Coef      |
|-------------------------------|-----------|
| Constant                      | -10055.2  |
| Flow_Rate                     | 4810.09   |
| Inj_Speed                     | 405.530   |
| Inj_Press                     | 1.23374   |
| Melt_Temp                     | -18.8731  |
| Viscosity                     | 45.3498   |
| Screw_Speed                   | 860.950   |
| Flow_Rate*Inj_Speed           | 65.2582   |
| Flow_Rate*Inj_Press           | -66.5493  |
| Flow_Rate*Melt_Temp           | -19.4249  |
| Flow_Rate*Viscosity           | -16.4319  |
| Flow_Rate*Screw_Speed         | -24.0610  |
| Inj_Speed*Melt_Temp           | 0.746925  |
| Inj_Speed*Screw_Speed         | -35.0448  |
| Flow_Rate*Inj_Speed*Melt_Temp | -0.258216 |
| Flow_Rate*Inj_Press*Melt_Temp | 0.287559  |

## Effects Pareto for Shrinkage

Alias Structure

```

I + Flow_Rate*Inj_Speed*Inj_Press*Viscosity +
    Flow_Rate*Melt_Temp*Viscosity*Screw_Speed +
    Inj_Speed*Inj_Press*Melt_Temp*Screw_Speed
Flow_Rate + Inj_Speed*Inj_Press*Viscosity + Melt_Temp*Viscosity*Screw_Speed +
    Flow_Rate*Inj_Speed*Inj_Press*Melt_Temp*Screw_Speed
Inj_Speed + Flow_Rate*Inj_Press*Viscosity + Inj_Press*Melt_Temp*Screw_Speed +
    Flow_Rate*Inj_Speed*Melt_Temp*Viscosity*Screw_Speed
Inj_Press + Flow_Rate*Inj_Speed*Viscosity + Inj_Speed*Melt_Temp*Screw_Speed +
    Flow_Rate*Inj_Press*Melt_Temp*Viscosity*Screw_Speed
Melt_Temp + Flow_Rate*Viscosity*Screw_Speed + Inj_Speed*Inj_Press*Screw_Speed +
    Flow_Rate*Inj_Speed*Inj_Press*Melt_Temp*Viscosity
Viscosity + Flow_Rate*Inj_Speed*Inj_Press + Flow_Rate*Melt_Temp*Screw_Speed +
    Inj_Speed*Inj_Press*Melt_Temp*Viscosity*Screw_Speed
Screw_Speed + Flow_Rate*Melt_Temp*Viscosity + Inj_Speed*Inj_Press*Melt_Temp +
    Flow_Rate*Inj_Speed*Inj_Press*Viscosity*Screw_Speed
Flow_Rate*Inj_Speed + Inj_Press*Viscosity +

```

Flow\_Rate\*Inj\_Press\*Melt\_Temp\*Screw\_Speed +  
 Inj\_Speed\*Melt\_Temp\*Viscosity\*Screw\_Speed  
 Flow\_Rate\*Inj\_Press + Inj\_Speed\*Viscosity +  
 Flow\_Rate\*Inj\_Speed\*Melt\_Temp\*Screw\_Speed +  
 Inj\_Press\*Melt\_Temp\*Viscosity\*Screw\_Speed  
 Flow\_Rate\*Melt\_Temp + Viscosity\*Screw\_Speed +  
 Flow\_Rate\*Inj\_Speed\*Inj\_Press\*Screw\_Speed +  
 Inj\_Speed\*Inj\_Press\*Melt\_Temp\*Viscosity  
 Flow\_Rate\*Viscosity + Inj\_Speed\*Inj\_Press + Melt\_Temp\*Screw\_Speed +  
 Flow\_Rate\*Inj\_Speed\*Inj\_Press\*Melt\_Temp\*Viscosity\*Screw\_Speed  
 Flow\_Rate\*Screw\_Speed + Melt\_Temp\*Viscosity +  
 Flow\_Rate\*Inj\_Speed\*Inj\_Press\*Melt\_Temp +  
 Inj\_Speed\*Inj\_Press\*Viscosity\*Screw\_Speed  
 Inj\_Speed\*Melt\_Temp + Inj\_Press\*Screw\_Speed +  
 Flow\_Rate\*Inj\_Speed\*Viscosity\*Screw\_Speed +  
 Flow\_Rate\*Inj\_Press\*Melt\_Temp\*Viscosity  
 Inj\_Speed\*Screw\_Speed + Inj\_Press\*Melt\_Temp +  
 Flow\_Rate\*Inj\_Speed\*Melt\_Temp\*Viscosity +  
 Flow\_Rate\*Inj\_Press\*Viscosity\*Screw\_Speed  
 Flow\_Rate\*Inj\_Speed\*Melt\_Temp + Flow\_Rate\*Inj\_Press\*Screw\_Speed +  
 Inj\_Speed\*Viscosity\*Screw\_Speed + Inj\_Press\*Melt\_Temp\*Viscosity  
 Flow\_Rate\*Inj\_Speed\*Screw\_Speed + Flow\_Rate\*Inj\_Press\*Melt\_Temp +  
 Inj\_Speed\*Melt\_Temp\*Viscosity + Inj\_Press\*Viscosity\*Screw\_Speed

Alias Information for Terms in the Model.  
 Totally confounded terms were removed from the analysis.

I + Flow\_Rate\*Inj\_Speed\*Inj\_Press\*Viscosity +  
 Flow\_Rate\*Melt\_Temp\*Viscosity\*Screw\_Speed +  
 Inj\_Speed\*Inj\_Press\*Melt\_Temp\*Screw\_Speed  
 Flow\_Rate + Inj\_Speed\*Inj\_Press\*Viscosity + Melt\_Temp\*Viscosity\*Screw\_Speed +  
 Flow\_Rate\*Inj\_Speed\*Inj\_Press\*Melt\_Temp\*Screw\_Speed  
 Inj\_Speed + Flow\_Rate\*Inj\_Press\*Viscosity + Inj\_Press\*Melt\_Temp\*Screw\_Speed +  
 Flow\_Rate\*Inj\_Speed\*Melt\_Temp\*Viscosity\*Screw\_Speed  
 Inj\_Press + Flow\_Rate\*Inj\_Speed\*Viscosity + Inj\_Speed\*Melt\_Temp\*Screw\_Speed +  
 Flow\_Rate\*Inj\_Press\*Melt\_Temp\*Viscosity\*Screw\_Speed  
 Melt\_Temp + Flow\_Rate\*Viscosity\*Screw\_Speed + Inj\_Speed\*Inj\_Press\*Screw\_Speed +  
 Flow\_Rate\*Inj\_Speed\*Inj\_Press\*Melt\_Temp\*Viscosity  
 Viscosity + Flow\_Rate\*Inj\_Speed\*Inj\_Press + Flow\_Rate\*Melt\_Temp\*Screw\_Speed +  
 Inj\_Speed\*Inj\_Press\*Melt\_Temp\*Viscosity\*Screw\_Speed  
 Screw\_Speed + Flow\_Rate\*Melt\_Temp\*Viscosity + Inj\_Speed\*Inj\_Press\*Melt\_Temp +  
 Flow\_Rate\*Inj\_Speed\*Inj\_Press\*Viscosity\*Screw\_Speed  
 Flow\_Rate\*Inj\_Speed + Inj\_Press\*Viscosity +  
 Flow\_Rate\*Inj\_Press\*Melt\_Temp\*Screw\_Speed +  
 Inj\_Speed\*Melt\_Temp\*Viscosity\*Screw\_Speed  
 Flow\_Rate\*Inj\_Press + Inj\_Speed\*Viscosity +  
 Flow\_Rate\*Inj\_Speed\*Melt\_Temp\*Screw\_Speed +  
 Inj\_Press\*Melt\_Temp\*Viscosity\*Screw\_Speed  
 Flow\_Rate\*Melt\_Temp + Viscosity\*Screw\_Speed +  
 Flow\_Rate\*Inj\_Speed\*Inj\_Press\*Screw\_Speed +  
 Inj\_Speed\*Inj\_Press\*Melt\_Temp\*Viscosity  
 Flow\_Rate\*Viscosity + Inj\_Speed\*Inj\_Press + Melt\_Temp\*Screw\_Speed +  
 Flow\_Rate\*Inj\_Speed\*Inj\_Press\*Melt\_Temp\*Viscosity\*Screw\_Speed  
 Flow\_Rate\*Screw\_Speed + Melt\_Temp\*Viscosity +  
 Flow\_Rate\*Inj\_Speed\*Inj\_Press\*Melt\_Temp +  
 Inj\_Speed\*Inj\_Press\*Viscosity\*Screw\_Speed  
 Inj\_Speed\*Melt\_Temp + Inj\_Press\*Screw\_Speed +  
 Flow\_Rate\*Inj\_Press\*Melt\_Temp\*Viscosity +  
 Flow\_Rate\*Inj\_Speed\*Viscosity\*Screw\_Speed  
 Inj\_Speed\*Screw\_Speed + Inj\_Press\*Melt\_Temp +  
 Flow\_Rate\*Inj\_Speed\*Melt\_Temp\*Viscosity +  
 Flow\_Rate\*Inj\_Press\*Viscosity\*Screw\_Speed

$\text{Flow\_Rate} \times \text{Inj\_Speed} \times \text{Melt\_Temp} + \text{Flow\_Rate} \times \text{Inj\_Press} \times \text{Screw\_Speed} +$   
 $\text{Inj\_Speed} \times \text{Viscosity} \times \text{Screw\_Speed} + \text{Inj\_Press} \times \text{Melt\_Temp} \times \text{Viscosity}$   
 $\text{Flow\_Rate} \times \text{Inj\_Press} \times \text{Melt\_Temp} + \text{Flow\_Rate} \times \text{Inj\_Speed} \times \text{Screw\_Speed} +$   
 $\text{Inj\_Speed} \times \text{Melt\_Temp} \times \text{Viscosity} + \text{Inj\_Press} \times \text{Viscosity} \times \text{Screw\_Speed}$

## Factorial Fit: Shrinkage versus Flow\_Rate, Inj\_Speed, ...

Estimated Effects and Coefficients for Shrinkage (coded units)

| Term                          | Effect | Coef   |
|-------------------------------|--------|--------|
| Constant                      |        | 13.688 |
| Flow_Rate                     | -1.875 | -0.937 |
| Inj_Speed                     | -4.375 | -2.187 |
| Inj_Press                     | 0.625  | 0.312  |
| Melt_Temp                     | -1.625 | -0.812 |
| Viscosity                     | -1.375 | -0.688 |
| Screw_Speed                   | -1.125 | -0.563 |
| Flow_Rate*Inj_Speed           | 3.875  | 1.937  |
| Flow_Rate*Inj_Press           | -1.625 | -0.813 |
| Flow_Rate*Melt_Temp           | 0.625  | 0.312  |
| Flow_Rate*Viscosity           | -1.625 | -0.812 |
| Flow_Rate*Screw_Speed         | -4.375 | -2.188 |
| Inj_Speed*Melt_Temp           | -2.375 | -1.188 |
| Inj_Speed*Screw_Speed         | -0.875 | -0.438 |
| Flow_Rate*Inj_Speed*Melt_Temp | -0.625 | -0.313 |
| Flow_Rate*Inj_Press*Melt_Temp | 5.375  | 2.687  |

S = \* PRESS = \*

Analysis of Variance for Shrinkage (coded units)

| Source                        | DF | Seq SS  | Adj SS  | Adj MS  | F | P |
|-------------------------------|----|---------|---------|---------|---|---|
| Main Effects                  | 6  | 115.375 | 115.375 | 19.229  | * | * |
| Flow_Rate                     | 1  | 14.062  | 14.062  | 14.062  | * | * |
| Inj_Speed                     | 1  | 76.562  | 76.562  | 76.562  | * | * |
| Inj_Press                     | 1  | 1.562   | 1.562   | 1.562   | * | * |
| Melt_Temp                     | 1  | 10.562  | 10.562  | 10.562  | * | * |
| Viscosity                     | 1  | 7.562   | 7.563   | 7.563   | * | * |
| Screw_Speed                   | 1  | 5.062   | 5.063   | 5.063   | * | * |
| 2-Way Interactions            | 7  | 184.937 | 184.937 | 26.420  | * | * |
| Flow_Rate*Inj_Speed           | 1  | 60.062  | 60.062  | 60.062  | * | * |
| Flow_Rate*Inj_Press           | 1  | 10.563  | 10.563  | 10.563  | * | * |
| Flow_Rate*Melt_Temp           | 1  | 1.562   | 1.562   | 1.562   | * | * |
| Flow_Rate*Viscosity           | 1  | 10.563  | 10.562  | 10.562  | * | * |
| Flow_Rate*Screw_Speed         | 1  | 76.562  | 76.562  | 76.562  | * | * |
| Inj_Speed*Melt_Temp           | 1  | 22.563  | 22.563  | 22.563  | * | * |
| Inj_Speed*Screw_Speed         | 1  | 3.062   | 3.063   | 3.063   | * | * |
| 3-Way Interactions            | 2  | 117.125 | 117.125 | 58.562  | * | * |
| Flow_Rate*Inj_Speed*Melt_Temp | 1  | 1.563   | 1.563   | 1.563   | * | * |
| Flow_Rate*Inj_Press*Melt_Temp | 1  | 115.562 | 115.562 | 115.562 | * | * |
| Residual Error                | 0  | *       | *       | *       |   |   |
| Total                         | 15 | 417.437 |         |         |   |   |

Estimated Coefficients for Shrinkage using data in uncoded units

| Term      | Coef     |
|-----------|----------|
| Constant  | -10794.6 |
| Flow_Rate | 4856.57  |
| Inj_Speed | 427.537  |

|                               |           |
|-------------------------------|-----------|
| Inj_Press                     | 2.33410   |
| Melt_Temp                     | -7.86960  |
| Viscosity                     | 89.3638   |
| Screw_Speed                   | 750.914   |
| Flow_Rate*Inj_Speed           | 34.2723   |
| Flow_Rate*Inj_Press           | -58.8028  |
| Flow_Rate*Melt_Temp           | -19.7770  |
| Flow_Rate*Viscosity           | -30.5164  |
| Flow_Rate*Screw_Speed         | -20.5399  |
| Inj_Speed*Melt_Temp           | 0.306784  |
| Inj_Speed*Screw_Speed         | -30.6434  |
| Flow_Rate*Inj_Speed*Melt_Temp | -0.117371 |
| Flow_Rate*Inj_Press*Melt_Temp | 0.252347  |

## Effects Pareto for Shrinkage

Alias Structure

```

I + Flow_Rate*Inj_Speed*Inj_Press*Viscosity +
    Flow_Rate*Melt_Temp*Viscosity*Screw_Speed +
    Inj_Speed*Inj_Press*Melt_Temp*Screw_Speed
Flow_Rate + Inj_Speed*Inj_Press*Viscosity + Melt_Temp*Viscosity*Screw_Speed +
    Flow_Rate*Inj_Speed*Inj_Press*Melt_Temp*Screw_Speed
Inj_Speed + Flow_Rate*Inj_Press*Viscosity + Inj_Press*Melt_Temp*Screw_Speed +
    Flow_Rate*Inj_Speed*Melt_Temp*Viscosity*Screw_Speed
Inj_Press + Flow_Rate*Inj_Speed*Viscosity + Inj_Speed*Melt_Temp*Screw_Speed +
    Flow_Rate*Inj_Press*Melt_Temp*Viscosity*Screw_Speed
Melt_Temp + Flow_Rate*Viscosity*Screw_Speed + Inj_Speed*Inj_Press*Screw_Speed +
    Flow_Rate*Inj_Speed*Inj_Press*Melt_Temp*Viscosity
Viscosity + Flow_Rate*Inj_Speed*Inj_Press + Flow_Rate*Melt_Temp*Screw_Speed +
    Inj_Speed*Inj_Press*Melt_Temp*Viscosity*Screw_Speed
Screw_Speed + Flow_Rate*Melt_Temp*Viscosity + Inj_Speed*Inj_Press*Melt_Temp +
    Flow_Rate*Inj_Speed*Inj_Press*Viscosity*Screw_Speed
Flow_Rate*Inj_Speed + Inj_Press*Viscosity +
    Flow_Rate*Inj_Press*Melt_Temp*Screw_Speed +
    Inj_Speed*Melt_Temp*Viscosity*Screw_Speed
Flow_Rate*Inj_Press + Inj_Speed*Viscosity +
    Flow_Rate*Inj_Speed*Melt_Temp*Screw_Speed +
    Inj_Press*Melt_Temp*Viscosity*Screw_Speed
Flow_Rate*Melt_Temp + Viscosity*Screw_Speed +
    Flow_Rate*Inj_Speed*Inj_Press*Screw_Speed +
    Inj_Speed*Inj_Press*Melt_Temp*Viscosity
Flow_Rate*Viscosity + Inj_Speed*Inj_Press + Melt_Temp*Screw_Speed +
    Flow_Rate*Inj_Speed*Inj_Press*Melt_Temp*Viscosity*Screw_Speed
Flow_Rate*Screw_Speed + Melt_Temp*Viscosity +
    Flow_Rate*Inj_Speed*Inj_Press*Melt_Temp +
    Inj_Speed*Inj_Press*Viscosity*Screw_Speed
Inj_Speed*Melt_Temp + Inj_Press*Screw_Speed +
    Flow_Rate*Inj_Speed*Viscosity*Screw_Speed +
    Flow_Rate*Inj_Press*Melt_Temp*Viscosity
Inj_Speed*Screw_Speed + Inj_Press*Melt_Temp +
    Flow_Rate*Inj_Speed*Melt_Temp*Viscosity +
    Flow_Rate*Inj_Press*Viscosity*Screw_Speed
Flow_Rate*Inj_Speed*Melt_Temp + Flow_Rate*Inj_Press*Screw_Speed +
    Inj_Speed*Viscosity*Screw_Speed + Inj_Press*Melt_Temp*Viscosity
Flow_Rate*Inj_Speed*Screw_Speed + Flow_Rate*Inj_Press*Melt_Temp +
    Inj_Speed*Melt_Temp*Viscosity + Inj_Press*Viscosity*Screw_Speed

```

Alias Information for Terms in the Model.

Totally confounded terms were removed from the analysis.



$$\begin{aligned}
& I + \text{Flow\_Rate} * \text{Inj\_Speed} * \text{Inj\_Press} * \text{Viscosity} + \\
& \quad \text{Flow\_Rate} * \text{Melt\_Temp} * \text{Viscosity} * \text{Screw\_Speed} + \\
& \quad \text{Inj\_Speed} * \text{Inj\_Press} * \text{Melt\_Temp} * \text{Screw\_Speed} \\
& \text{Flow\_Rate} + \text{Inj\_Speed} * \text{Inj\_Press} * \text{Viscosity} + \text{Melt\_Temp} * \text{Viscosity} * \text{Screw\_Speed} + \\
& \quad \text{Flow\_Rate} * \text{Inj\_Speed} * \text{Inj\_Press} * \text{Melt\_Temp} * \text{Screw\_Speed} \\
& \text{Inj\_Speed} + \text{Flow\_Rate} * \text{Inj\_Press} * \text{Viscosity} + \text{Inj\_Press} * \text{Melt\_Temp} * \text{Screw\_Speed} + \\
& \quad \text{Flow\_Rate} * \text{Inj\_Speed} * \text{Melt\_Temp} * \text{Viscosity} * \text{Screw\_Speed} \\
& \text{Inj\_Press} + \text{Flow\_Rate} * \text{Inj\_Speed} * \text{Viscosity} + \text{Inj\_Speed} * \text{Melt\_Temp} * \text{Screw\_Speed} + \\
& \quad \text{Flow\_Rate} * \text{Inj\_Press} * \text{Melt\_Temp} * \text{Viscosity} * \text{Screw\_Speed} \\
& \text{Melt\_Temp} + \text{Flow\_Rate} * \text{Viscosity} * \text{Screw\_Speed} + \text{Inj\_Speed} * \text{Inj\_Press} * \text{Screw\_Speed} + \\
& \quad \text{Flow\_Rate} * \text{Inj\_Speed} * \text{Inj\_Press} * \text{Melt\_Temp} * \text{Viscosity} \\
& \text{Viscosity} + \text{Flow\_Rate} * \text{Inj\_Speed} * \text{Inj\_Press} + \text{Flow\_Rate} * \text{Melt\_Temp} * \text{Screw\_Speed} + \\
& \quad \text{Inj\_Speed} * \text{Inj\_Press} * \text{Melt\_Temp} * \text{Viscosity} * \text{Screw\_Speed} \\
& \text{Screw\_Speed} + \text{Flow\_Rate} * \text{Melt\_Temp} * \text{Viscosity} + \text{Inj\_Speed} * \text{Inj\_Press} * \text{Melt\_Temp} + \\
& \quad \text{Flow\_Rate} * \text{Inj\_Speed} * \text{Inj\_Press} * \text{Viscosity} * \text{Screw\_Speed} \\
& \text{Flow\_Rate} * \text{Inj\_Speed} + \text{Inj\_Press} * \text{Viscosity} + \\
& \quad \text{Flow\_Rate} * \text{Inj\_Press} * \text{Melt\_Temp} * \text{Screw\_Speed} + \\
& \quad \text{Inj\_Speed} * \text{Melt\_Temp} * \text{Viscosity} * \text{Screw\_Speed} \\
& \text{Flow\_Rate} * \text{Inj\_Press} + \text{Inj\_Speed} * \text{Viscosity} + \\
& \quad \text{Flow\_Rate} * \text{Inj\_Speed} * \text{Melt\_Temp} * \text{Screw\_Speed} + \\
& \quad \text{Inj\_Press} * \text{Melt\_Temp} * \text{Viscosity} * \text{Screw\_Speed} \\
& \text{Flow\_Rate} * \text{Melt\_Temp} + \text{Viscosity} * \text{Screw\_Speed} + \\
& \quad \text{Flow\_Rate} * \text{Inj\_Speed} * \text{Inj\_Press} * \text{Screw\_Speed} + \\
& \quad \text{Inj\_Speed} * \text{Inj\_Press} * \text{Melt\_Temp} * \text{Viscosity} \\
& \text{Flow\_Rate} * \text{Viscosity} + \text{Inj\_Speed} * \text{Inj\_Press} + \text{Melt\_Temp} * \text{Screw\_Speed} + \\
& \quad \text{Flow\_Rate} * \text{Inj\_Speed} * \text{Inj\_Press} * \text{Melt\_Temp} * \text{Viscosity} * \text{Screw\_Speed} \\
& \text{Flow\_Rate} * \text{Screw\_Speed} + \text{Melt\_Temp} * \text{Viscosity} + \\
& \quad \text{Flow\_Rate} * \text{Inj\_Speed} * \text{Inj\_Press} * \text{Melt\_Temp} + \\
& \quad \text{Inj\_Speed} * \text{Inj\_Press} * \text{Viscosity} * \text{Screw\_Speed} \\
& \text{Inj\_Speed} * \text{Melt\_Temp} + \text{Inj\_Press} * \text{Screw\_Speed} + \\
& \quad \text{Flow\_Rate} * \text{Inj\_Press} * \text{Melt\_Temp} * \text{Viscosity} + \\
& \quad \text{Flow\_Rate} * \text{Inj\_Speed} * \text{Viscosity} * \text{Screw\_Speed} \\
& \text{Inj\_Speed} * \text{Screw\_Speed} + \text{Inj\_Press} * \text{Melt\_Temp} + \\
& \quad \text{Flow\_Rate} * \text{Inj\_Speed} * \text{Melt\_Temp} * \text{Viscosity} + \\
& \quad \text{Flow\_Rate} * \text{Inj\_Press} * \text{Viscosity} * \text{Screw\_Speed} \\
& \text{Flow\_Rate} * \text{Inj\_Speed} * \text{Melt\_Temp} + \text{Flow\_Rate} * \text{Inj\_Press} * \text{Screw\_Speed} + \\
& \quad \text{Inj\_Speed} * \text{Viscosity} * \text{Screw\_Speed} + \text{Inj\_Press} * \text{Melt\_Temp} * \text{Viscosity} \\
& \text{Flow\_Rate} * \text{Inj\_Press} * \text{Melt\_Temp} + \text{Flow\_Rate} * \text{Inj\_Speed} * \text{Screw\_Speed} + \\
& \quad \text{Inj\_Speed} * \text{Melt\_Temp} * \text{Viscosity} + \text{Inj\_Press} * \text{Viscosity} * \text{Screw\_Speed}
\end{aligned}$$

## Factorial Fit: Shrinkage versus Flow\_Rate, Inj\_Speed, ...

Estimated Effects and Coefficients for Shrinkage (coded units)

| Term                          | Effect | Coef   |
|-------------------------------|--------|--------|
| Constant                      |        | 13.563 |
| Flow_Rate                     | -0.875 | -0.437 |
| Inj_Speed                     | -4.125 | -2.062 |
| Inj_Press                     | -0.375 | -0.188 |
| Melt_Temp                     | -2.625 | -1.312 |
| Viscosity                     | -1.625 | -0.813 |
| Screw_Speed                   | -0.875 | -0.437 |
| Flow_Rate*Inj_Speed           | 2.875  | 1.437  |
| Flow_Rate*Inj_Press           | -1.375 | -0.688 |
| Flow_Rate*Melt_Temp           | 0.875  | 0.437  |
| Flow_Rate*Viscosity           | -0.625 | -0.312 |
| Flow_Rate*Screw_Speed         | -5.375 | -2.688 |
| Inj_Speed*Melt_Temp           | -1.375 | -0.688 |
| Inj_Speed*Screw_Speed         | -1.125 | -0.563 |
| Flow_Rate*Inj_Speed*Melt_Temp | -0.875 | -0.438 |
| Flow_Rate*Inj_Press*Melt_Temp | 6.375  | 3.187  |

S = \* PRESS = \*

#### Analysis of Variance for Shrinkage (coded units)

| Source                        | DF | Seq SS  | Adj SS  | Adj MS  | F | P |
|-------------------------------|----|---------|---------|---------|---|---|
| Main Effects                  | 6  | 112.875 | 112.875 | 18.812  | * | * |
| Flow_Rate                     | 1  | 3.062   | 3.062   | 3.062   | * | * |
| Inj_Speed                     | 1  | 68.062  | 68.062  | 68.062  | * | * |
| Inj_Press                     | 1  | 0.563   | 0.563   | 0.563   | * | * |
| Melt_Temp                     | 1  | 27.563  | 27.563  | 27.563  | * | * |
| Viscosity                     | 1  | 10.562  | 10.563  | 10.563  | * | * |
| Screw_Speed                   | 1  | 3.062   | 3.062   | 3.062   | * | * |
| 2-Way Interactions            | 7  | 173.437 | 173.437 | 24.777  | * | * |
| Flow_Rate*Inj_Speed           | 1  | 33.062  | 33.062  | 33.062  | * | * |
| Flow_Rate*Inj_Press           | 1  | 7.563   | 7.563   | 7.563   | * | * |
| Flow_Rate*Melt_Temp           | 1  | 3.062   | 3.062   | 3.062   | * | * |
| Flow_Rate*Viscosity           | 1  | 1.563   | 1.562   | 1.562   | * | * |
| Flow_Rate*Screw_Speed         | 1  | 115.562 | 115.563 | 115.563 | * | * |
| Inj_Speed*Melt_Temp           | 1  | 7.563   | 7.563   | 7.563   | * | * |
| Inj_Speed*Screw_Speed         | 1  | 5.062   | 5.063   | 5.063   | * | * |
| 3-Way Interactions            | 2  | 165.625 | 165.625 | 82.812  | * | * |
| Flow_Rate*Inj_Speed*Melt_Temp | 1  | 3.063   | 3.063   | 3.063   | * | * |
| Flow_Rate*Inj_Press*Melt_Temp | 1  | 162.562 | 162.562 | 162.562 | * | * |
| Residual Error                | 0  | *       | *       | *       |   |   |
| Total                         | 15 | 451.937 |         |         |   |   |

#### Estimated Coefficients for Shrinkage using data in uncoded units

| Term                          | Coef      |
|-------------------------------|-----------|
| Constant                      | -12284.5  |
| Flow_Rate                     | 5636.15   |
| Inj_Speed                     | 493.277   |
| Inj_Press                     | 1.92981   |
| Melt_Temp                     | -11.9124  |
| Viscosity                     | 32.1784   |
| Screw_Speed                   | 893.878   |
| Flow_Rate*Inj_Speed           | 43.1925   |
| Flow_Rate*Inj_Press           | -69.4836  |
| Flow_Rate*Melt_Temp           | -22.8286  |
| Flow_Rate*Viscosity           | -11.7371  |
| Flow_Rate*Screw_Speed         | -25.2347  |
| Inj_Speed*Melt_Temp           | 0.468498  |
| Inj_Speed*Screw_Speed         | -36.3620  |
| Flow_Rate*Inj_Speed*Melt_Temp | -0.164319 |
| Flow_Rate*Inj_Press*Melt_Temp | 0.299296  |

### Effects Pareto for Shrinkage

#### Alias Structure

```

I + Flow_Rate*Inj_Speed*Inj_Press*Viscosity +
    Flow_Rate*Melt_Temp*Viscosity*Screw_Speed +
    Inj_Speed*Inj_Press*Melt_Temp*Screw_Speed
Flow_Rate + Inj_Speed*Inj_Press*Viscosity + Melt_Temp*Viscosity*Screw_Speed +
    Flow_Rate*Inj_Speed*Inj_Press*Melt_Temp*Screw_Speed
Inj_Speed + Flow_Rate*Inj_Press*Viscosity + Inj_Press*Melt_Temp*Screw_Speed +
    Flow_Rate*Inj_Speed*Melt_Temp*Viscosity*Screw_Speed

```



$\text{Flow\_Rate} \times \text{Screw\_Speed} + \text{Melt\_Temp} \times \text{Viscosity} +$   
 $\text{Flow\_Rate} \times \text{Inj\_Speed} \times \text{Inj\_Press} \times \text{Melt\_Temp} +$   
 $\text{Inj\_Speed} \times \text{Inj\_Press} \times \text{Viscosity} \times \text{Screw\_Speed}$   
 $\text{Inj\_Speed} \times \text{Melt\_Temp} + \text{Inj\_Press} \times \text{Screw\_Speed} +$   
 $\text{Flow\_Rate} \times \text{Inj\_Press} \times \text{Melt\_Temp} \times \text{Viscosity} +$   
 $\text{Flow\_Rate} \times \text{Inj\_Speed} \times \text{Viscosity} \times \text{Screw\_Speed}$   
 $\text{Inj\_Speed} \times \text{Screw\_Speed} + \text{Inj\_Press} \times \text{Melt\_Temp} +$   
 $\text{Flow\_Rate} \times \text{Inj\_Speed} \times \text{Melt\_Temp} \times \text{Viscosity} +$   
 $\text{Flow\_Rate} \times \text{Inj\_Press} \times \text{Viscosity} \times \text{Screw\_Speed}$   
 $\text{Flow\_Rate} \times \text{Inj\_Speed} \times \text{Melt\_Temp} + \text{Flow\_Rate} \times \text{Inj\_Press} \times \text{Screw\_Speed} +$   
 $\text{Inj\_Speed} \times \text{Viscosity} \times \text{Screw\_Speed} + \text{Inj\_Press} \times \text{Melt\_Temp} \times \text{Viscosity}$   
 $\text{Flow\_Rate} \times \text{Inj\_Press} \times \text{Melt\_Temp} + \text{Flow\_Rate} \times \text{Inj\_Speed} \times \text{Screw\_Speed} +$   
 $\text{Inj\_Speed} \times \text{Melt\_Temp} \times \text{Viscosity} + \text{Inj\_Press} \times \text{Viscosity} \times \text{Screw\_Speed}$

## Factorial Fit: Shrinkage versus Flow\_Rate, Inj\_Speed, ...

Estimated Effects and Coefficients for Shrinkage (coded units)

| Term                          | Effect | Coef   |
|-------------------------------|--------|--------|
| Constant                      |        | 13.375 |
| Flow_Rate                     | -1.250 | -0.625 |
| Inj_Speed                     | -4.500 | -2.250 |
| Inj_Press                     | -0.000 | -0.000 |
| Melt_Temp                     | -3.000 | -1.500 |
| Viscosity                     | -1.250 | -0.625 |
| Screw_Speed                   | -0.500 | -0.250 |
| Flow_Rate*Inj_Speed           | 2.500  | 1.250  |
| Flow_Rate*Inj_Press           | -1.000 | -0.500 |
| Flow_Rate*Melt_Temp           | 0.500  | 0.250  |
| Flow_Rate*Viscosity           | -0.250 | -0.125 |
| Flow_Rate*Screw_Speed         | -5.000 | -2.500 |
| Inj_Speed*Melt_Temp           | -1.750 | -0.875 |
| Inj_Speed*Screw_Speed         | -0.750 | -0.375 |
| Flow_Rate*Inj_Speed*Melt_Temp | -1.250 | -0.625 |
| Flow_Rate*Inj_Press*Melt_Temp | 6.750  | 3.375  |

S = \* PRESS = \*

Analysis of Variance for Shrinkage (coded units)

| Source                        | DF | Seq SS  | Adj SS  | Adj MS  | F | P |
|-------------------------------|----|---------|---------|---------|---|---|
| Main Effects                  | 6  | 130.500 | 130.500 | 21.750  | * | * |
| Flow_Rate                     | 1  | 6.250   | 6.250   | 6.250   | * | * |
| Inj_Speed                     | 1  | 81.000  | 81.000  | 81.000  | * | * |
| Inj_Press                     | 1  | 0.000   | 0.000   | 0.000   | * | * |
| Melt_Temp                     | 1  | 36.000  | 36.000  | 36.000  | * | * |
| Viscosity                     | 1  | 6.250   | 6.250   | 6.250   | * | * |
| Screw_Speed                   | 1  | 1.000   | 1.000   | 1.000   | * | * |
| 2-Way Interactions            | 7  | 144.750 | 144.750 | 20.679  | * | * |
| Flow_Rate*Inj_Speed           | 1  | 25.000  | 25.000  | 25.000  | * | * |
| Flow_Rate*Inj_Press           | 1  | 4.000   | 4.000   | 4.000   | * | * |
| Flow_Rate*Melt_Temp           | 1  | 1.000   | 1.000   | 1.000   | * | * |
| Flow_Rate*Viscosity           | 1  | 0.250   | 0.250   | 0.250   | * | * |
| Flow_Rate*Screw_Speed         | 1  | 100.000 | 100.000 | 100.000 | * | * |
| Inj_Speed*Melt_Temp           | 1  | 12.250  | 12.250  | 12.250  | * | * |
| Inj_Speed*Screw_Speed         | 1  | 2.250   | 2.250   | 2.250   | * | * |
| 3-Way Interactions            | 2  | 188.500 | 188.500 | 94.250  | * | * |
| Flow_Rate*Inj_Speed*Melt_Temp | 1  | 6.250   | 6.250   | 6.250   | * | * |
| Flow_Rate*Inj_Press*Melt_Temp | 1  | 182.250 | 182.250 | 182.250 | * | * |
| Residual Error                | 0  | *       | *       | *       |   |   |

Total 15 463.750

Estimated Coefficients for Shrinkage using data in uncoded units

| Term                          | Coef      |
|-------------------------------|-----------|
| Constant                      | -11991.3  |
| Flow_Rate                     | 5630.52   |
| Inj_Speed                     | 483.023   |
| Inj_Press                     | 1.41714   |
| Melt_Temp                     | -16.0138  |
| Viscosity                     | 11.6714   |
| Screw_Speed                   | 934.892   |
| Flow_Rate*Inj_Speed           | 58.6854   |
| Flow_Rate*Inj_Press           | -73.3568  |
| Flow_Rate*Melt_Temp           | -23.0047  |
| Flow_Rate*Viscosity           | -4.69484  |
| Flow_Rate*Screw_Speed         | -23.4742  |
| Inj_Speed*Melt_Temp           | 0.673568  |
| Inj_Speed*Screw_Speed         | -38.4127  |
| Flow_Rate*Inj_Speed*Melt_Temp | -0.234742 |
| Flow_Rate*Inj_Press*Melt_Temp | 0.316901  |

## Effects Pareto for Shrinkage

Alias Structure

I + Flow\_Rate\*Inj\_Speed\*Inj\_Press\*Viscosity +  
Flow\_Rate\*Melt\_Temp\*Viscosity\*Screw\_Speed +  
Inj\_Speed\*Inj\_Press\*Melt\_Temp\*Screw\_Speed  
Flow\_Rate + Inj\_Speed\*Inj\_Press\*Viscosity + Melt\_Temp\*Viscosity\*Screw\_Speed +  
Flow\_Rate\*Inj\_Speed\*Inj\_Press\*Melt\_Temp\*Screw\_Speed  
Inj\_Speed + Flow\_Rate\*Inj\_Press\*Viscosity + Inj\_Press\*Melt\_Temp\*Screw\_Speed +  
Flow\_Rate\*Inj\_Speed\*Melt\_Temp\*Viscosity\*Screw\_Speed  
Inj\_Press + Flow\_Rate\*Inj\_Speed\*Viscosity + Inj\_Speed\*Melt\_Temp\*Screw\_Speed +  
Flow\_Rate\*Inj\_Press\*Melt\_Temp\*Viscosity\*Screw\_Speed  
Melt\_Temp + Flow\_Rate\*Viscosity\*Screw\_Speed + Inj\_Speed\*Inj\_Press\*Screw\_Speed +  
Flow\_Rate\*Inj\_Speed\*Inj\_Press\*Melt\_Temp\*Viscosity  
Viscosity + Flow\_Rate\*Inj\_Speed\*Inj\_Press + Flow\_Rate\*Melt\_Temp\*Screw\_Speed +  
Inj\_Speed\*Inj\_Press\*Melt\_Temp\*Viscosity\*Screw\_Speed  
Screw\_Speed + Flow\_Rate\*Melt\_Temp\*Viscosity + Inj\_Speed\*Inj\_Press\*Melt\_Temp +  
Flow\_Rate\*Inj\_Speed\*Inj\_Press\*Viscosity\*Screw\_Speed  
Flow\_Rate\*Inj\_Speed + Inj\_Press\*Viscosity +  
Flow\_Rate\*Inj\_Press\*Melt\_Temp\*Screw\_Speed +  
Inj\_Speed\*Melt\_Temp\*Viscosity\*Screw\_Speed  
Flow\_Rate\*Inj\_Press + Inj\_Speed\*Viscosity +  
Flow\_Rate\*Inj\_Speed\*Melt\_Temp\*Screw\_Speed +  
Inj\_Press\*Melt\_Temp\*Viscosity\*Screw\_Speed  
Flow\_Rate\*Melt\_Temp + Viscosity\*Screw\_Speed +  
Flow\_Rate\*Inj\_Speed\*Inj\_Press\*Screw\_Speed +  
Inj\_Speed\*Inj\_Press\*Melt\_Temp\*Viscosity  
Flow\_Rate\*Viscosity + Inj\_Speed\*Inj\_Press + Melt\_Temp\*Screw\_Speed +  
Flow\_Rate\*Inj\_Speed\*Inj\_Press\*Melt\_Temp\*Viscosity\*Screw\_Speed  
Flow\_Rate\*Screw\_Speed + Melt\_Temp\*Viscosity +  
Flow\_Rate\*Inj\_Speed\*Inj\_Press\*Melt\_Temp +  
Inj\_Speed\*Inj\_Press\*Viscosity\*Screw\_Speed  
Inj\_Speed\*Melt\_Temp + Inj\_Press\*Screw\_Speed +  
Flow\_Rate\*Inj\_Speed\*Viscosity\*Screw\_Speed +  
Flow\_Rate\*Inj\_Press\*Melt\_Temp\*Viscosity  
Inj\_Speed\*Screw\_Speed + Inj\_Press\*Melt\_Temp +  
Flow\_Rate\*Inj\_Speed\*Melt\_Temp\*Viscosity +

```

Flow_Rate*Inj_Press*Viscosity*Screw_Speed
Flow_Rate*Inj_Speed*Melt_Temp + Flow_Rate*Inj_Press*Screw_Speed +
Inj_Speed*Viscosity*Screw_Speed + Inj_Press*Melt_Temp*Viscosity
Flow_Rate*Inj_Speed*Screw_Speed + Flow_Rate*Inj_Press*Melt_Temp +
Inj_Speed*Melt_Temp*Viscosity + Inj_Press*Viscosity*Screw_Speed

```

Alias Information for Terms in the Model.  
Totally confounded terms were removed from the analysis.

```

I + Flow_Rate*Inj_Speed*Inj_Press*Viscosity +
Flow_Rate*Melt_Temp*Viscosity*Screw_Speed +
Inj_Speed*Inj_Press*Melt_Temp*Screw_Speed
Flow_Rate + Inj_Speed*Inj_Press*Viscosity + Melt_Temp*Viscosity*Screw_Speed +
Flow_Rate*Inj_Speed*Inj_Press*Melt_Temp*Screw_Speed
Inj_Speed + Flow_Rate*Inj_Press*Viscosity + Inj_Press*Melt_Temp*Screw_Speed +
Flow_Rate*Inj_Speed*Melt_Temp*Viscosity*Screw_Speed
Inj_Press + Flow_Rate*Inj_Speed*Viscosity + Inj_Speed*Melt_Temp*Screw_Speed +
Flow_Rate*Inj_Press*Melt_Temp*Viscosity*Screw_Speed
Melt_Temp + Flow_Rate*Viscosity*Screw_Speed + Inj_Speed*Inj_Press*Screw_Speed +
Flow_Rate*Inj_Speed*Inj_Press*Melt_Temp*Viscosity
Viscosity + Flow_Rate*Inj_Speed*Inj_Press + Flow_Rate*Melt_Temp*Screw_Speed +
Inj_Speed*Inj_Press*Melt_Temp*Viscosity*Screw_Speed
Screw_Speed + Flow_Rate*Melt_Temp*Viscosity + Inj_Speed*Inj_Press*Melt_Temp +
Flow_Rate*Inj_Speed*Inj_Press*Viscosity*Screw_Speed
Flow_Rate*Inj_Speed + Inj_Press*Viscosity +
Flow_Rate*Inj_Press*Melt_Temp*Screw_Speed +
Inj_Speed*Melt_Temp*Viscosity*Screw_Speed
Flow_Rate*Inj_Press + Inj_Speed*Viscosity +
Flow_Rate*Inj_Speed*Melt_Temp*Screw_Speed +
Inj_Press*Melt_Temp*Viscosity*Screw_Speed
Flow_Rate*Melt_Temp + Viscosity*Screw_Speed +
Flow_Rate*Inj_Speed*Inj_Press*Screw_Speed +
Inj_Speed*Inj_Press*Melt_Temp*Viscosity
Flow_Rate*Viscosity + Inj_Speed*Inj_Press + Melt_Temp*Screw_Speed +
Flow_Rate*Inj_Speed*Inj_Press*Melt_Temp*Viscosity*Screw_Speed
Flow_Rate*Screw_Speed + Melt_Temp*Viscosity +
Flow_Rate*Inj_Speed*Inj_Press*Melt_Temp +
Inj_Speed*Inj_Press*Viscosity*Screw_Speed
Inj_Speed*Melt_Temp + Inj_Press*Screw_Speed +
Flow_Rate*Inj_Press*Melt_Temp*Viscosity +
Flow_Rate*Inj_Speed*Viscosity*Screw_Speed
Inj_Speed*Screw_Speed + Inj_Press*Melt_Temp +
Flow_Rate*Inj_Speed*Melt_Temp*Viscosity +
Flow_Rate*Inj_Press*Viscosity*Screw_Speed
Flow_Rate*Inj_Speed*Melt_Temp + Flow_Rate*Inj_Press*Screw_Speed +
Inj_Speed*Viscosity*Screw_Speed + Inj_Press*Melt_Temp*Viscosity
Flow_Rate*Inj_Press*Melt_Temp + Flow_Rate*Inj_Speed*Screw_Speed +
Inj_Speed*Melt_Temp*Viscosity + Inj_Press*Viscosity*Screw_Speed

```

## Factorial Fit: Shrinkage versus Flow\_Rate, Inj\_Speed, ...

Estimated Effects and Coefficients for Shrinkage (coded units)

| Term        | Effect | Coef   |
|-------------|--------|--------|
| Constant    |        | 13.125 |
| Flow_Rate   | -1.750 | -0.875 |
| Inj_Speed   | -5.000 | -2.500 |
| Inj_Press   | -0.500 | -0.250 |
| Melt_Temp   | -3.500 | -1.750 |
| Viscosity   | -1.750 | -0.875 |
| Screw_Speed | -1.000 | -0.500 |

|                               |        |        |
|-------------------------------|--------|--------|
| Flow_Rate*Inj_Speed           | 2.000  | 1.000  |
| Flow_Rate*Inj_Press           | -1.500 | -0.750 |
| Flow_Rate*Melt_Temp           | -0.000 | -0.000 |
| Flow_Rate*Viscosity           | -0.750 | -0.375 |
| Flow_Rate*Screw_Speed         | -5.500 | -2.750 |
| Inj_Speed*Melt_Temp           | -2.250 | -1.125 |
| Inj_Speed*Screw_Speed         | -1.250 | -0.625 |
| Flow_Rate*Inj_Speed*Melt_Temp | -1.750 | -0.875 |
| Flow_Rate*Inj_Press*Melt_Temp | 6.250  | 3.125  |

S = \*      PRESS = \*

#### Analysis of Variance for Shrinkage (coded units)

| Source                        | DF | Seq SS  | Adj SS  | Adj MS  | F | P |
|-------------------------------|----|---------|---------|---------|---|---|
| Main Effects                  | 6  | 178.500 | 178.500 | 29.750  | * | * |
| Flow_Rate                     | 1  | 12.250  | 12.250  | 12.250  | * | * |
| Inj_Speed                     | 1  | 100.000 | 100.000 | 100.000 | * | * |
| Inj_Press                     | 1  | 1.000   | 1.000   | 1.000   | * | * |
| Melt_Temp                     | 1  | 49.000  | 49.000  | 49.000  | * | * |
| Viscosity                     | 1  | 12.250  | 12.250  | 12.250  | * | * |
| Screw_Speed                   | 1  | 4.000   | 4.000   | 4.000   | * | * |
| 2-Way Interactions            | 7  | 174.750 | 174.750 | 24.964  | * | * |
| Flow_Rate*Inj_Speed           | 1  | 16.000  | 16.000  | 16.000  | * | * |
| Flow_Rate*Inj_Press           | 1  | 9.000   | 9.000   | 9.000   | * | * |
| Flow_Rate*Melt_Temp           | 1  | 0.000   | 0.000   | 0.000   | * | * |
| Flow_Rate*Viscosity           | 1  | 2.250   | 2.250   | 2.250   | * | * |
| Flow_Rate*Screw_Speed         | 1  | 121.000 | 121.000 | 121.000 | * | * |
| Inj_Speed*Melt_Temp           | 1  | 20.250  | 20.250  | 20.250  | * | * |
| Inj_Speed*Screw_Speed         | 1  | 6.250   | 6.250   | 6.250   | * | * |
| 3-Way Interactions            | 2  | 168.500 | 168.500 | 84.250  | * | * |
| Flow_Rate*Inj_Speed*Melt_Temp | 1  | 12.250  | 12.250  | 12.250  | * | * |
| Flow_Rate*Inj_Press*Melt_Temp | 1  | 156.250 | 156.250 | 156.250 | * | * |
| Residual Error                | 0  | *       | *       | *       |   |   |
| Total                         | 15 | 521.750 |         |         |   |   |

#### Estimated Coefficients for Shrinkage using data in uncoded units

| Term                          | Coef      |
|-------------------------------|-----------|
| Constant                      | -9976.09  |
| Flow_Rate                     | 4811.74   |
| Inj_Speed                     | 376.387   |
| Inj_Press                     | 2.10070   |
| Melt_Temp                     | -21.4824  |
| Viscosity                     | 39.0141   |
| Screw_Speed                   | 880.207   |
| Flow_Rate*Inj_Speed           | 79.3427   |
| Flow_Rate*Inj_Press           | -68.1925  |
| Flow_Rate*Melt_Temp           | -19.0141  |
| Flow_Rate*Viscosity           | -14.0845  |
| Flow_Rate*Screw_Speed         | -25.8216  |
| Inj_Speed*Melt_Temp           | 0.946995  |
| Inj_Speed*Screw_Speed         | -35.6784  |
| Flow_Rate*Inj_Speed*Melt_Temp | -0.328638 |
| Flow_Rate*Inj_Press*Melt_Temp | 0.293427  |

#### Effects Pareto for Shrinkage

Alias Structure

```
I + Flow_Rate*Inj_Speed*Inj_Press*Viscosity +
    Flow_Rate*Melt_Temp*Viscosity*Screw_Speed +
    Inj_Speed*Inj_Press*Melt_Temp*Screw_Speed
Flow_Rate + Inj_Speed*Inj_Press*Viscosity + Melt_Temp*Viscosity*Screw_Speed +
    Flow_Rate*Inj_Speed*Inj_Press*Melt_Temp*Screw_Speed
Inj_Speed + Flow_Rate*Inj_Press*Viscosity + Inj_Press*Melt_Temp*Screw_Speed +
    Flow_Rate*Inj_Speed*Melt_Temp*Viscosity*Screw_Speed
Inj_Press + Flow_Rate*Inj_Speed*Viscosity + Inj_Speed*Melt_Temp*Screw_Speed +
    Flow_Rate*Inj_Press*Melt_Temp*Viscosity*Screw_Speed
Melt_Temp + Flow_Rate*Viscosity*Screw_Speed + Inj_Speed*Inj_Press*Screw_Speed +
    Flow_Rate*Inj_Speed*Inj_Press*Melt_Temp*Viscosity
Viscosity + Flow_Rate*Inj_Speed*Inj_Press + Flow_Rate*Melt_Temp*Screw_Speed +
    Inj_Speed*Inj_Press*Melt_Temp*Viscosity*Screw_Speed
Screw_Speed + Flow_Rate*Melt_Temp*Viscosity + Inj_Speed*Inj_Press*Melt_Temp +
    Flow_Rate*Inj_Speed*Inj_Press*Viscosity*Screw_Speed
Flow_Rate*Inj_Speed + Inj_Press*Viscosity +
    Flow_Rate*Inj_Press*Melt_Temp*Screw_Speed +
    Inj_Speed*Melt_Temp*Viscosity*Screw_Speed
Flow_Rate*Inj_Press + Inj_Speed*Viscosity +
    Flow_Rate*Inj_Speed*Melt_Temp*Screw_Speed +
    Inj_Press*Melt_Temp*Viscosity*Screw_Speed
Flow_Rate*Melt_Temp + Viscosity*Screw_Speed +
    Flow_Rate*Inj_Speed*Inj_Press*Screw_Speed +
    Inj_Speed*Inj_Press*Melt_Temp*Viscosity
Flow_Rate*Viscosity + Inj_Speed*Inj_Press + Melt_Temp*Screw_Speed +
    Flow_Rate*Inj_Speed*Inj_Press*Melt_Temp*Viscosity*Screw_Speed
Flow_Rate*Screw_Speed + Melt_Temp*Viscosity +
    Flow_Rate*Inj_Speed*Inj_Press*Melt_Temp +
    Inj_Speed*Inj_Press*Viscosity*Screw_Speed
Inj_Speed*Melt_Temp + Inj_Press*Screw_Speed +
    Flow_Rate*Inj_Speed*Viscosity*Screw_Speed +
    Flow_Rate*Inj_Press*Melt_Temp*Viscosity
Inj_Speed*Screw_Speed + Inj_Press*Melt_Temp +
    Flow_Rate*Inj_Speed*Melt_Temp*Viscosity +
    Flow_Rate*Inj_Press*Viscosity*Screw_Speed
Flow_Rate*Inj_Speed*Melt_Temp + Flow_Rate*Inj_Press*Screw_Speed +
    Inj_Speed*Viscosity*Screw_Speed + Inj_Press*Melt_Temp*Viscosity
Flow_Rate*Inj_Speed*Screw_Speed + Flow_Rate*Inj_Press*Melt_Temp +
    Inj_Speed*Melt_Temp*Viscosity + Inj_Press*Viscosity*Screw_Speed
```

Alias Information for Terms in the Model.

Totally confounded terms were removed from the analysis.

```
I + Flow_Rate*Inj_Speed*Inj_Press*Viscosity +
    Flow_Rate*Melt_Temp*Viscosity*Screw_Speed +
    Inj_Speed*Inj_Press*Melt_Temp*Screw_Speed
Flow_Rate + Inj_Speed*Inj_Press*Viscosity + Melt_Temp*Viscosity*Screw_Speed +
    Flow_Rate*Inj_Speed*Inj_Press*Melt_Temp*Screw_Speed
Inj_Speed + Flow_Rate*Inj_Press*Viscosity + Inj_Press*Melt_Temp*Screw_Speed +
    Flow_Rate*Inj_Speed*Melt_Temp*Viscosity*Screw_Speed
Inj_Press + Flow_Rate*Inj_Speed*Viscosity + Inj_Speed*Melt_Temp*Screw_Speed +
    Flow_Rate*Inj_Press*Melt_Temp*Viscosity*Screw_Speed
Melt_Temp + Flow_Rate*Viscosity*Screw_Speed + Inj_Speed*Inj_Press*Screw_Speed +
    Flow_Rate*Inj_Speed*Inj_Press*Melt_Temp*Viscosity
Viscosity + Flow_Rate*Inj_Speed*Inj_Press + Flow_Rate*Melt_Temp*Screw_Speed +
    Inj_Speed*Inj_Press*Melt_Temp*Viscosity*Screw_Speed
Screw_Speed + Flow_Rate*Melt_Temp*Viscosity + Inj_Speed*Inj_Press*Melt_Temp +
    Flow_Rate*Inj_Speed*Inj_Press*Viscosity*Screw_Speed
Flow_Rate*Inj_Speed + Inj_Press*Viscosity +
    Flow_Rate*Inj_Press*Melt_Temp*Screw_Speed +
```



```

      Inj_Speed*Melt_Temp*Viscosity*Screw_Speed
Flow_Rate*Inj_Press + Inj_Speed*Viscosity +
      Flow_Rate*Inj_Speed*Melt_Temp*Screw_Speed +
      Inj_Press*Melt_Temp*Viscosity*Screw_Speed
Flow_Rate*Melt_Temp + Viscosity*Screw_Speed +
      Flow_Rate*Inj_Speed*Inj_Press*Screw_Speed +
      Inj_Speed*Inj_Press*Melt_Temp*Viscosity
Flow_Rate*Viscosity + Inj_Speed*Inj_Press + Melt_Temp*Screw_Speed +
      Flow_Rate*Inj_Speed*Inj_Press*Melt_Temp*Viscosity*Screw_Speed
Flow_Rate*Screw_Speed + Melt_Temp*Viscosity +
      Flow_Rate*Inj_Speed*Inj_Press*Melt_Temp +
      Inj_Speed*Inj_Press*Viscosity*Screw_Speed
Inj_Speed*Melt_Temp + Inj_Press*Screw_Speed +
      Flow_Rate*Inj_Press*Melt_Temp*Viscosity +
      Flow_Rate*Inj_Speed*Viscosity*Screw_Speed
Inj_Speed*Screw_Speed + Inj_Press*Melt_Temp +
      Flow_Rate*Inj_Speed*Melt_Temp*Viscosity +
      Flow_Rate*Inj_Press*Viscosity*Screw_Speed
Flow_Rate*Inj_Speed*Melt_Temp + Flow_Rate*Inj_Press*Screw_Speed +
      Inj_Speed*Viscosity*Screw_Speed + Inj_Press*Melt_Temp*Viscosity
Flow_Rate*Inj_Press*Melt_Temp + Flow_Rate*Inj_Speed*Screw_Speed +
      Inj_Speed*Melt_Temp*Viscosity + Inj_Press*Viscosity*Screw_Speed

```

## Factorial Fit: Shrinkage versus Flow\_Rate, Inj\_Speed, ...

Estimated Effects and Coefficients for Shrinkage (coded units)

| Term                          | Effect | Coef   |
|-------------------------------|--------|--------|
| Constant                      |        | 13.500 |
| Flow_Rate                     | -1.000 | -0.500 |
| Inj_Speed                     | -4.250 | -2.125 |
| Inj_Press                     | 0.250  | 0.125  |
| Melt_Temp                     | -2.750 | -1.375 |
| Viscosity                     | -1.000 | -0.500 |
| Screw_Speed                   | -0.250 | -0.125 |
| Flow_Rate*Inj_Speed           | 2.750  | 1.375  |
| Flow_Rate*Inj_Press           | -0.750 | -0.375 |
| Flow_Rate*Melt_Temp           | 0.750  | 0.375  |
| Flow_Rate*Viscosity           | 0.000  | 0.000  |
| Flow_Rate*Screw_Speed         | -4.750 | -2.375 |
| Inj_Speed*Melt_Temp           | -1.500 | -0.750 |
| Inj_Speed*Screw_Speed         | -0.500 | -0.250 |
| Flow_Rate*Inj_Speed*Melt_Temp | -1.000 | -0.500 |
| Flow_Rate*Inj_Press*Melt_Temp | 7.000  | 3.500  |

S = \* PRESS = \*

Analysis of Variance for Shrinkage (coded units)

| Source              | DF | Seq SS  | Adj SS  | Adj MS | F | P |
|---------------------|----|---------|---------|--------|---|---|
| Main Effects        | 6  | 111.000 | 111.000 | 18.500 | * | * |
| Flow_Rate           | 1  | 4.000   | 4.000   | 4.000  | * | * |
| Inj_Speed           | 1  | 72.250  | 72.250  | 72.250 | * | * |
| Inj_Press           | 1  | 0.250   | 0.250   | 0.250  | * | * |
| Melt_Temp           | 1  | 30.250  | 30.250  | 30.250 | * | * |
| Viscosity           | 1  | 4.000   | 4.000   | 4.000  | * | * |
| Screw_Speed         | 1  | 0.250   | 0.250   | 0.250  | * | * |
| 2-Way Interactions  | 7  | 135.000 | 135.000 | 19.286 | * | * |
| Flow_Rate*Inj_Speed | 1  | 30.250  | 30.250  | 30.250 | * | * |
| Flow_Rate*Inj_Press | 1  | 2.250   | 2.250   | 2.250  | * | * |

|                               |    |         |         |         |   |   |
|-------------------------------|----|---------|---------|---------|---|---|
| Flow_Rate*Melt_Temp           | 1  | 2.250   | 2.250   | 2.250   | * | * |
| Flow_Rate*Viscosity           | 1  | 0.000   | 0.000   | 0.000   | * | * |
| Flow_Rate*Screw_Speed         | 1  | 90.250  | 90.250  | 90.250  | * | * |
| Inj_Speed*Melt_Temp           | 1  | 9.000   | 9.000   | 9.000   | * | * |
| Inj_Speed*Screw_Speed         | 1  | 1.000   | 1.000   | 1.000   | * | * |
| 3-Way Interactions            | 2  | 200.000 | 200.000 | 100.000 | * | * |
| Flow_Rate*Inj_Speed*Melt_Temp | 1  | 4.000   | 4.000   | 4.000   | * | * |
| Flow_Rate*Inj_Press*Melt_Temp | 1  | 196.000 | 196.000 | 196.000 | * | * |
| Residual Error                | 0  | *       | *       | *       |   |   |
| Total                         | 15 | 446.000 |         |         |   |   |

Estimated Coefficients for Shrinkage using data in uncoded units

| Term                          | Coef         |
|-------------------------------|--------------|
| Constant                      | -12998.8     |
| Flow_Rate                     | 6039.91      |
| Inj_Speed                     | 536.342      |
| Inj_Press                     | 1.07535      |
| Melt_Temp                     | -13.2796     |
| Viscosity                     | -2.00000     |
| Screw_Speed                   | 962.235      |
| Flow_Rate*Inj_Speed           | 48.3568      |
| Flow_Rate*Inj_Press           | -75.9390     |
| Flow_Rate*Melt_Temp           | -25.0000     |
| Flow_Rate*Viscosity           | -1.02879E-11 |
| Flow_Rate*Screw_Speed         | -22.3005     |
| Inj_Speed*Melt_Temp           | 0.536854     |
| Inj_Speed*Screw_Speed         | -39.7798     |
| Flow_Rate*Inj_Speed*Melt_Temp | -0.187793    |
| Flow_Rate*Inj_Press*Melt_Temp | 0.328638     |

## Effects Pareto for Shrinkage

Alias Structure

```

I + Flow_Rate*Inj_Speed*Inj_Press*Viscosity +
    Flow_Rate*Melt_Temp*Viscosity*Screw_Speed +
    Inj_Speed*Inj_Press*Melt_Temp*Screw_Speed
Flow_Rate + Inj_Speed*Inj_Press*Viscosity + Melt_Temp*Viscosity*Screw_Speed +
    Flow_Rate*Inj_Speed*Inj_Press*Melt_Temp*Screw_Speed
Inj_Speed + Flow_Rate*Inj_Press*Viscosity + Inj_Press*Melt_Temp*Screw_Speed +
    Flow_Rate*Inj_Speed*Melt_Temp*Viscosity*Screw_Speed
Inj_Press + Flow_Rate*Inj_Speed*Viscosity + Inj_Speed*Melt_Temp*Screw_Speed +
    Flow_Rate*Inj_Press*Melt_Temp*Viscosity*Screw_Speed
Melt_Temp + Flow_Rate*Viscosity*Screw_Speed + Inj_Speed*Inj_Press*Screw_Speed +
    Flow_Rate*Inj_Speed*Inj_Press*Melt_Temp*Viscosity
Viscosity + Flow_Rate*Inj_Speed*Inj_Press + Flow_Rate*Melt_Temp*Screw_Speed +
    Inj_Speed*Inj_Press*Melt_Temp*Viscosity*Screw_Speed
Screw_Speed + Flow_Rate*Melt_Temp*Viscosity + Inj_Speed*Inj_Press*Melt_Temp +
    Flow_Rate*Inj_Speed*Inj_Press*Viscosity*Screw_Speed
Flow_Rate*Inj_Speed + Inj_Press*Viscosity +
    Flow_Rate*Inj_Press*Melt_Temp*Screw_Speed +
    Inj_Speed*Melt_Temp*Viscosity*Screw_Speed
Flow_Rate*Inj_Press + Inj_Speed*Viscosity +
    Flow_Rate*Inj_Speed*Melt_Temp*Screw_Speed +
    Inj_Press*Melt_Temp*Viscosity*Screw_Speed
Flow_Rate*Melt_Temp + Viscosity*Screw_Speed +
    Flow_Rate*Inj_Speed*Inj_Press*Screw_Speed +
    Inj_Speed*Inj_Press*Melt_Temp*Viscosity
Flow_Rate*Viscosity + Inj_Speed*Inj_Press + Melt_Temp*Screw_Speed +

```

```

Flow_Rate*Inj_Speed*Inj_Press*Melt_Temp*Viscosity*Screw_Speed
Flow_Rate*Screw_Speed + Melt_Temp*Viscosity +
Flow_Rate*Inj_Speed*Inj_Press*Melt_Temp +
Inj_Speed*Inj_Press*Viscosity*Screw_Speed
Inj_Speed*Melt_Temp + Inj_Press*Screw_Speed +
Flow_Rate*Inj_Speed*Viscosity*Screw_Speed +
Flow_Rate*Inj_Press*Melt_Temp*Viscosity
Inj_Speed*Screw_Speed + Inj_Press*Melt_Temp +
Flow_Rate*Inj_Speed*Melt_Temp*Viscosity +
Flow_Rate*Inj_Press*Viscosity*Screw_Speed
Flow_Rate*Inj_Speed*Melt_Temp + Flow_Rate*Inj_Press*Screw_Speed +
Inj_Speed*Viscosity*Screw_Speed + Inj_Press*Melt_Temp*Viscosity
Flow_Rate*Inj_Speed*Screw_Speed + Flow_Rate*Inj_Press*Melt_Temp +
Inj_Speed*Melt_Temp*Viscosity + Inj_Press*Viscosity*Screw_Speed

```

Alias Information for Terms in the Model.  
 Totally confounded terms were removed from the analysis.

```

I + Flow_Rate*Inj_Speed*Inj_Press*Viscosity +
Flow_Rate*Melt_Temp*Viscosity*Screw_Speed +
Inj_Speed*Inj_Press*Melt_Temp*Screw_Speed
Flow_Rate + Inj_Speed*Inj_Press*Viscosity + Melt_Temp*Viscosity*Screw_Speed +
Flow_Rate*Inj_Speed*Inj_Press*Melt_Temp*Screw_Speed
Inj_Speed + Flow_Rate*Inj_Press*Viscosity + Inj_Press*Melt_Temp*Screw_Speed +
Flow_Rate*Inj_Speed*Melt_Temp*Viscosity*Screw_Speed
Inj_Press + Flow_Rate*Inj_Speed*Viscosity + Inj_Speed*Melt_Temp*Screw_Speed +
Flow_Rate*Inj_Press*Melt_Temp*Viscosity*Screw_Speed
Melt_Temp + Flow_Rate*Viscosity*Screw_Speed + Inj_Speed*Inj_Press*Screw_Speed +
Flow_Rate*Inj_Speed*Inj_Press*Melt_Temp*Viscosity
Viscosity + Flow_Rate*Inj_Speed*Inj_Press + Flow_Rate*Melt_Temp*Screw_Speed +
Inj_Speed*Inj_Press*Melt_Temp*Viscosity*Screw_Speed
Screw_Speed + Flow_Rate*Melt_Temp*Viscosity + Inj_Speed*Inj_Press*Melt_Temp +
Flow_Rate*Inj_Speed*Inj_Press*Viscosity*Screw_Speed
Flow_Rate*Inj_Speed + Inj_Press*Viscosity +
Flow_Rate*Inj_Press*Melt_Temp*Screw_Speed +
Inj_Speed*Melt_Temp*Viscosity*Screw_Speed
Flow_Rate*Inj_Press + Inj_Speed*Viscosity +
Flow_Rate*Inj_Speed*Melt_Temp*Screw_Speed +
Inj_Press*Melt_Temp*Viscosity*Screw_Speed
Flow_Rate*Melt_Temp + Viscosity*Screw_Speed +
Flow_Rate*Inj_Speed*Inj_Press*Screw_Speed +
Inj_Speed*Inj_Press*Melt_Temp*Viscosity
Flow_Rate*Viscosity + Inj_Speed*Inj_Press + Melt_Temp*Screw_Speed +
Flow_Rate*Inj_Speed*Inj_Press*Melt_Temp*Viscosity*Screw_Speed
Flow_Rate*Screw_Speed + Melt_Temp*Viscosity +
Flow_Rate*Inj_Speed*Inj_Press*Melt_Temp +
Inj_Speed*Inj_Press*Viscosity*Screw_Speed
Inj_Speed*Melt_Temp + Inj_Press*Screw_Speed +
Flow_Rate*Inj_Press*Melt_Temp*Viscosity +
Flow_Rate*Inj_Speed*Viscosity*Screw_Speed
Inj_Speed*Screw_Speed + Inj_Press*Melt_Temp +
Flow_Rate*Inj_Speed*Melt_Temp*Viscosity +
Flow_Rate*Inj_Press*Viscosity*Screw_Speed
Flow_Rate*Inj_Speed*Melt_Temp + Flow_Rate*Inj_Press*Screw_Speed +
Inj_Speed*Viscosity*Screw_Speed + Inj_Press*Melt_Temp*Viscosity
Flow_Rate*Inj_Press*Melt_Temp + Flow_Rate*Inj_Speed*Screw_Speed +
Inj_Speed*Melt_Temp*Viscosity + Inj_Press*Viscosity*Screw_Speed

```

## Factorial Fit: Black\_dots versus Flow\_Rate, Inj\_Speed, ...

Estimated Effects and Coefficients for Black\_dots (coded units)

| Term                          | Effect | Coef   |
|-------------------------------|--------|--------|
| Constant                      |        | 14.813 |
| Flow_Rate                     | 2.875  | 1.438  |
| Inj_Speed                     | 2.625  | 1.313  |
| Inj_Press                     | -3.125 | -1.562 |
| Melt_Temp                     | -6.125 | -3.062 |
| Viscosity                     | -2.875 | -1.438 |
| Screw_Speed                   | 0.125  | 0.062  |
| Flow_Rate*Inj_Speed           | 3.875  | 1.938  |
| Flow_Rate*Inj_Press           | -5.375 | -2.687 |
| Flow_Rate*Melt_Temp           | -1.875 | -0.938 |
| Flow_Rate*Viscosity           | -7.625 | -3.812 |
| Flow_Rate*Screw_Speed         | 1.875  | 0.937  |
| Inj_Speed*Melt_Temp           | -2.125 | -1.063 |
| Inj_Speed*Screw_Speed         | 2.625  | 1.312  |
| Flow_Rate*Inj_Speed*Melt_Temp | -7.875 | -3.938 |
| Flow_Rate*Inj_Press*Melt_Temp | 9.375  | 4.687  |

S = \*      PRESS = \*

#### Analysis of Variance for Black\_dots (coded units)

| Source                        | DF | Seq SS  | Adj SS  | Adj MS  | F | P |
|-------------------------------|----|---------|---------|---------|---|---|
| Main Effects                  | 6  | 282.87  | 282.875 | 47.146  | * | * |
| Flow_Rate                     | 1  | 33.06   | 33.063  | 33.063  | * | * |
| Inj_Speed                     | 1  | 27.56   | 27.563  | 27.563  | * | * |
| Inj_Press                     | 1  | 39.06   | 39.062  | 39.062  | * | * |
| Melt_Temp                     | 1  | 150.06  | 150.063 | 150.063 | * | * |
| Viscosity                     | 1  | 33.06   | 33.063  | 33.063  | * | * |
| Screw_Speed                   | 1  | 0.06    | 0.062   | 0.062   | * | * |
| 2-Way Interactions            | 7  | 481.94  | 481.937 | 68.848  | * | * |
| Flow_Rate*Inj_Speed           | 1  | 60.06   | 60.063  | 60.063  | * | * |
| Flow_Rate*Inj_Press           | 1  | 115.56  | 115.562 | 115.562 | * | * |
| Flow_Rate*Melt_Temp           | 1  | 14.06   | 14.063  | 14.063  | * | * |
| Flow_Rate*Viscosity           | 1  | 232.56  | 232.562 | 232.562 | * | * |
| Flow_Rate*Screw_Speed         | 1  | 14.06   | 14.062  | 14.062  | * | * |
| Inj_Speed*Melt_Temp           | 1  | 18.06   | 18.063  | 18.063  | * | * |
| Inj_Speed*Screw_Speed         | 1  | 27.56   | 27.562  | 27.562  | * | * |
| 3-Way Interactions            | 2  | 599.63  | 599.625 | 299.813 | * | * |
| Flow_Rate*Inj_Speed*Melt_Temp | 1  | 248.06  | 248.063 | 248.063 | * | * |
| Flow_Rate*Inj_Press*Melt_Temp | 1  | 351.56  | 351.562 | 351.562 | * | * |
| Residual Error                | 0  | *       | *       | *       |   |   |
| Total                         | 15 | 1364.44 |         |         |   |   |

#### Estimated Coefficients for Black\_dots using data in uncoded units

| Term                  | Coef     |
|-----------------------|----------|
| Constant              | 1575.60  |
| Flow_Rate             | 1880.99  |
| Inj_Speed             | -143.881 |
| Inj_Press             | 7.46086  |
| Melt_Temp             | -97.1324 |
| Viscosity             | 426.477  |
| Screw_Speed           | 1157.39  |
| Flow_Rate*Inj_Speed   | 347.418  |
| Flow_Rate*Inj_Press   | -103.756 |
| Flow_Rate*Melt_Temp   | -7.21831 |
| Flow_Rate*Viscosity   | -143.192 |
| Flow_Rate*Screw_Speed | 8.80282  |

|                               |          |
|-------------------------------|----------|
| Inj_Speed*Melt_Temp           | 4.42148  |
| Inj_Speed*Screw_Speed         | -52.6176 |
| Flow_Rate*Inj_Speed*Melt_Temp | -1.47887 |
| Flow_Rate*Inj_Press*Melt_Temp | 0.440141 |

## Effects Pareto for Black\_dots

Alias Structure

```

I + Flow_Rate*Inj_Speed*Inj_Press*Viscosity +
    Flow_Rate*Melt_Temp*Viscosity*Screw_Speed +
    Inj_Speed*Inj_Press*Melt_Temp*Screw_Speed
Flow_Rate + Inj_Speed*Inj_Press*Viscosity + Melt_Temp*Viscosity*Screw_Speed +
    Flow_Rate*Inj_Speed*Inj_Press*Melt_Temp*Screw_Speed
Inj_Speed + Flow_Rate*Inj_Press*Viscosity + Inj_Press*Melt_Temp*Screw_Speed +
    Flow_Rate*Inj_Speed*Melt_Temp*Viscosity*Screw_Speed
Inj_Press + Flow_Rate*Inj_Speed*Viscosity + Inj_Speed*Melt_Temp*Screw_Speed +
    Flow_Rate*Inj_Press*Melt_Temp*Viscosity*Screw_Speed
Melt_Temp + Flow_Rate*Viscosity*Screw_Speed + Inj_Speed*Inj_Press*Screw_Speed +
    Flow_Rate*Inj_Speed*Inj_Press*Melt_Temp*Viscosity
Viscosity + Flow_Rate*Inj_Speed*Inj_Press + Flow_Rate*Melt_Temp*Screw_Speed +
    Inj_Speed*Inj_Press*Melt_Temp*Viscosity*Screw_Speed
Screw_Speed + Flow_Rate*Melt_Temp*Viscosity + Inj_Speed*Inj_Press*Melt_Temp +
    Flow_Rate*Inj_Speed*Inj_Press*Viscosity*Screw_Speed
Flow_Rate*Inj_Speed + Inj_Press*Viscosity +
    Flow_Rate*Inj_Press*Melt_Temp*Screw_Speed +
    Inj_Speed*Melt_Temp*Viscosity*Screw_Speed
Flow_Rate*Inj_Press + Inj_Speed*Viscosity +
    Flow_Rate*Inj_Speed*Melt_Temp*Screw_Speed +
    Inj_Press*Melt_Temp*Viscosity*Screw_Speed
Flow_Rate*Melt_Temp + Viscosity*Screw_Speed +
    Flow_Rate*Inj_Speed*Inj_Press*Screw_Speed +
    Inj_Speed*Inj_Press*Melt_Temp*Viscosity
Flow_Rate*Viscosity + Inj_Speed*Inj_Press + Melt_Temp*Screw_Speed +
    Flow_Rate*Inj_Speed*Inj_Press*Melt_Temp*Viscosity*Screw_Speed
Flow_Rate*Screw_Speed + Melt_Temp*Viscosity +
    Flow_Rate*Inj_Speed*Inj_Press*Melt_Temp +
    Inj_Speed*Inj_Press*Viscosity*Screw_Speed
Inj_Speed*Melt_Temp + Inj_Press*Screw_Speed +
    Flow_Rate*Inj_Speed*Viscosity*Screw_Speed +
    Flow_Rate*Inj_Press*Melt_Temp*Viscosity
Inj_Speed*Screw_Speed + Inj_Press*Melt_Temp +
    Flow_Rate*Inj_Speed*Melt_Temp*Viscosity +
    Flow_Rate*Inj_Press*Viscosity*Screw_Speed
Flow_Rate*Inj_Speed*Melt_Temp + Flow_Rate*Inj_Press*Screw_Speed +
    Inj_Speed*Viscosity*Screw_Speed + Inj_Press*Melt_Temp*Viscosity
Flow_Rate*Inj_Speed*Screw_Speed + Flow_Rate*Inj_Press*Melt_Temp +
    Inj_Speed*Melt_Temp*Viscosity + Inj_Press*Viscosity*Screw_Speed

```

Alias Information for Terms in the Model.

Totally confounded terms were removed from the analysis.

```

I + Flow_Rate*Inj_Speed*Inj_Press*Viscosity +
    Flow_Rate*Melt_Temp*Viscosity*Screw_Speed +
    Inj_Speed*Inj_Press*Melt_Temp*Screw_Speed
Flow_Rate + Inj_Speed*Inj_Press*Viscosity + Melt_Temp*Viscosity*Screw_Speed +
    Flow_Rate*Inj_Speed*Inj_Press*Melt_Temp*Screw_Speed
Inj_Speed + Flow_Rate*Inj_Press*Viscosity + Inj_Press*Melt_Temp*Screw_Speed +
    Flow_Rate*Inj_Speed*Melt_Temp*Viscosity*Screw_Speed
Inj_Press + Flow_Rate*Inj_Speed*Viscosity + Inj_Speed*Melt_Temp*Screw_Speed +

```

```

Flow_Rate*Inj_Press*Melt_Temp*Viscosity*Screw_Speed
Melt_Temp + Flow_Rate*Viscosity*Screw_Speed + Inj_Speed*Inj_Press*Screw_Speed +
Flow_Rate*Inj_Speed*Inj_Press*Melt_Temp*Viscosity
Viscosity + Flow_Rate*Inj_Speed*Inj_Press + Flow_Rate*Melt_Temp*Screw_Speed +
Inj_Speed*Inj_Press*Melt_Temp*Viscosity*Screw_Speed
Screw_Speed + Flow_Rate*Melt_Temp*Viscosity + Inj_Speed*Inj_Press*Melt_Temp +
Flow_Rate*Inj_Speed*Inj_Press*Viscosity*Screw_Speed
Flow_Rate*Inj_Speed + Inj_Press*Viscosity +
Flow_Rate*Inj_Press*Melt_Temp*Screw_Speed +
Inj_Speed*Melt_Temp*Viscosity*Screw_Speed
Flow_Rate*Inj_Press + Inj_Speed*Viscosity +
Flow_Rate*Inj_Speed*Inj_Press*Melt_Temp*Screw_Speed +
Inj_Press*Melt_Temp*Viscosity*Screw_Speed
Flow_Rate*Melt_Temp + Viscosity*Screw_Speed +
Flow_Rate*Inj_Speed*Inj_Press*Screw_Speed +
Inj_Speed*Inj_Press*Melt_Temp*Viscosity
Flow_Rate*Viscosity + Inj_Speed*Inj_Press + Melt_Temp*Screw_Speed +
Flow_Rate*Inj_Speed*Inj_Press*Melt_Temp*Viscosity*Screw_Speed
Flow_Rate*Screw_Speed + Melt_Temp*Viscosity +
Flow_Rate*Inj_Speed*Inj_Press*Melt_Temp +
Inj_Speed*Inj_Press*Viscosity*Screw_Speed
Inj_Speed*Melt_Temp + Inj_Press*Screw_Speed +
Flow_Rate*Inj_Press*Melt_Temp*Viscosity +
Flow_Rate*Inj_Speed*Viscosity*Screw_Speed
Inj_Speed*Screw_Speed + Inj_Press*Melt_Temp +
Flow_Rate*Inj_Speed*Melt_Temp*Viscosity +
Flow_Rate*Inj_Press*Viscosity*Screw_Speed
Flow_Rate*Inj_Speed*Melt_Temp + Flow_Rate*Inj_Press*Screw_Speed +
Inj_Speed*Viscosity*Screw_Speed + Inj_Press*Melt_Temp*Viscosity
Flow_Rate*Inj_Press*Melt_Temp + Flow_Rate*Inj_Speed*Screw_Speed +
Inj_Speed*Melt_Temp*Viscosity + Inj_Press*Viscosity*Screw_Speed

```

## Factorial Fit: Black\_dots versus Flow\_Rate, Inj\_Speed, ...

Estimated Effects and Coefficients for Black\_dots (coded units)

| Term                          | Effect | Coef   |
|-------------------------------|--------|--------|
| Constant                      |        | 13.750 |
| Flow_Rate                     | 0.750  | 0.375  |
| Inj_Speed                     | 0.500  | 0.250  |
| Inj_Press                     | -1.000 | -0.500 |
| Melt_Temp                     | -4.000 | -2.000 |
| Viscosity                     | -0.750 | -0.375 |
| Screw_Speed                   | -2.000 | -1.000 |
| Flow_Rate*Inj_Speed           | 1.750  | 0.875  |
| Flow_Rate*Inj_Press           | -3.250 | -1.625 |
| Flow_Rate*Melt_Temp           | 0.250  | 0.125  |
| Flow_Rate*Viscosity           | -5.500 | -2.750 |
| Flow_Rate*Screw_Speed         | -0.250 | -0.125 |
| Inj_Speed*Melt_Temp           | -0.000 | -0.000 |
| Inj_Speed*Screw_Speed         | 0.500  | 0.250  |
| Flow_Rate*Inj_Speed*Melt_Temp | -5.750 | -2.875 |
| Flow_Rate*Inj_Press*Melt_Temp | 7.250  | 3.625  |

S = \* PRESS = \*

Analysis of Variance for Black\_dots (coded units)

| Source       | DF | Seq SS | Adj SS | Adj MS | F | P |
|--------------|----|--------|--------|--------|---|---|
| Main Effects | 6  | 89.500 | 89.500 | 14.917 | * | * |

|                               |    |         |         |         |   |   |
|-------------------------------|----|---------|---------|---------|---|---|
| Flow_Rate                     | 1  | 2.250   | 2.250   | 2.250   | * | * |
| Inj_Speed                     | 1  | 1.000   | 1.000   | 1.000   | * | * |
| Inj_Press                     | 1  | 4.000   | 4.000   | 4.000   | * | * |
| Melt_Temp                     | 1  | 64.000  | 64.000  | 64.000  | * | * |
| Viscosity                     | 1  | 2.250   | 2.250   | 2.250   | * | * |
| Screw_Speed                   | 1  | 16.000  | 16.000  | 16.000  | * | * |
| 2-Way Interactions            | 7  | 177.000 | 177.000 | 25.286  | * | * |
| Flow_Rate*Inj_Speed           | 1  | 12.250  | 12.250  | 12.250  | * | * |
| Flow_Rate*Inj_Press           | 1  | 42.250  | 42.250  | 42.250  | * | * |
| Flow_Rate*Melt_Temp           | 1  | 0.250   | 0.250   | 0.250   | * | * |
| Flow_Rate*Viscosity           | 1  | 121.000 | 121.000 | 121.000 | * | * |
| Flow_Rate*Screw_Speed         | 1  | 0.250   | 0.250   | 0.250   | * | * |
| Inj_Speed*Melt_Temp           | 1  | 0.000   | 0.000   | 0.000   | * | * |
| Inj_Speed*Screw_Speed         | 1  | 1.000   | 1.000   | 1.000   | * | * |
| 3-Way Interactions            | 2  | 342.500 | 342.500 | 171.250 | * | * |
| Flow_Rate*Inj_Speed*Melt_Temp | 1  | 132.250 | 132.250 | 132.250 | * | * |
| Flow_Rate*Inj_Press*Melt_Temp | 1  | 210.250 | 210.250 | 210.250 | * | * |
| Residual Error                | 0  | *       | *       | *       |   |   |
| Total                         | 15 | 609.000 |         |         |   |   |

Estimated Coefficients for Black\_dots using data in uncoded units

| Term                          | Coef     |
|-------------------------------|----------|
| Constant                      | 448.392  |
| Flow_Rate                     | 1729.34  |
| Inj_Speed                     | -62.5369 |
| Inj_Press                     | 4.55569  |
| Melt_Temp                     | -73.8911 |
| Viscosity                     | 310.270  |
| Screw_Speed                   | 924.974  |
| Flow_Rate*Inj_Speed           | 251.643  |
| Flow_Rate*Inj_Press           | -79.8122 |
| Flow_Rate*Melt_Temp           | -6.22066 |
| Flow_Rate*Viscosity           | -103.286 |
| Flow_Rate*Screw_Speed         | -1.17371 |
| Inj_Speed*Melt_Temp           | 3.25941  |
| Inj_Speed*Screw_Speed         | -40.9969 |
| Flow_Rate*Inj_Speed*Melt_Temp | -1.07981 |
| Flow_Rate*Inj_Press*Melt_Temp | 0.340376 |

## Effects Pareto for Black\_dots

Alias Structure

```

I + Flow_Rate*Inj_Speed*Inj_Press*Viscosity +
    Flow_Rate*Melt_Temp*Viscosity*Screw_Speed +
    Inj_Speed*Inj_Press*Melt_Temp*Screw_Speed
Flow_Rate + Inj_Speed*Inj_Press*Viscosity + Melt_Temp*Viscosity*Screw_Speed +
    Flow_Rate*Inj_Speed*Inj_Press*Melt_Temp*Screw_Speed
Inj_Speed + Flow_Rate*Inj_Press*Viscosity + Inj_Press*Melt_Temp*Screw_Speed +
    Flow_Rate*Inj_Speed*Melt_Temp*Viscosity*Screw_Speed
Inj_Press + Flow_Rate*Inj_Speed*Viscosity + Inj_Speed*Melt_Temp*Screw_Speed +
    Flow_Rate*Inj_Press*Melt_Temp*Viscosity*Screw_Speed
Melt_Temp + Flow_Rate*Viscosity*Screw_Speed + Inj_Speed*Inj_Press*Screw_Speed +
    Flow_Rate*Inj_Speed*Inj_Press*Melt_Temp*Viscosity
Viscosity + Flow_Rate*Inj_Speed*Inj_Press + Flow_Rate*Melt_Temp*Screw_Speed +
    Inj_Speed*Inj_Press*Melt_Temp*Viscosity*Screw_Speed
Screw_Speed + Flow_Rate*Melt_Temp*Viscosity + Inj_Speed*Inj_Press*Melt_Temp +
    Flow_Rate*Inj_Speed*Inj_Press*Viscosity*Screw_Speed
Flow_Rate*Inj_Speed + Inj_Press*Viscosity +

```

```

Flow_Rate*Inj_Press*Melt_Temp*Screw_Speed +
Inj_Speed*Melt_Temp*Viscosity*Screw_Speed
Flow_Rate*Inj_Press + Inj_Speed*Viscosity +
Flow_Rate*Inj_Speed*Melt_Temp*Screw_Speed +
Inj_Press*Melt_Temp*Viscosity*Screw_Speed
Flow_Rate*Melt_Temp + Viscosity*Screw_Speed +
Flow_Rate*Inj_Speed*Inj_Press*Screw_Speed +
Inj_Speed*Inj_Press*Melt_Temp*Viscosity
Flow_Rate*Viscosity + Inj_Speed*Inj_Press + Melt_Temp*Screw_Speed +
Flow_Rate*Inj_Speed*Inj_Press*Melt_Temp*Viscosity*Screw_Speed
Flow_Rate*Screw_Speed + Melt_Temp*Viscosity +
Flow_Rate*Inj_Speed*Inj_Press*Melt_Temp +
Inj_Speed*Inj_Press*Viscosity*Screw_Speed
Inj_Speed*Melt_Temp + Inj_Press*Screw_Speed +
Flow_Rate*Inj_Speed*Viscosity*Screw_Speed +
Flow_Rate*Inj_Press*Melt_Temp*Viscosity
Inj_Speed*Screw_Speed + Inj_Press*Melt_Temp +
Flow_Rate*Inj_Speed*Melt_Temp*Viscosity +
Flow_Rate*Inj_Press*Viscosity*Screw_Speed
Flow_Rate*Inj_Speed*Melt_Temp + Flow_Rate*Inj_Press*Screw_Speed +
Inj_Speed*Viscosity*Screw_Speed + Inj_Press*Melt_Temp*Viscosity
Flow_Rate*Inj_Speed*Screw_Speed + Flow_Rate*Inj_Press*Melt_Temp +
Inj_Speed*Melt_Temp*Viscosity + Inj_Press*Viscosity*Screw_Speed

```

Alias Information for Terms in the Model.  
Totally confounded terms were removed from the analysis.

```

I + Flow_Rate*Inj_Speed*Inj_Press*Viscosity +
Flow_Rate*Melt_Temp*Viscosity*Screw_Speed +
Inj_Speed*Inj_Press*Melt_Temp*Screw_Speed
Flow_Rate + Inj_Speed*Inj_Press*Viscosity + Melt_Temp*Viscosity*Screw_Speed +
Flow_Rate*Inj_Speed*Inj_Press*Melt_Temp*Screw_Speed
Inj_Speed + Flow_Rate*Inj_Press*Viscosity + Inj_Press*Melt_Temp*Screw_Speed +
Flow_Rate*Inj_Speed*Melt_Temp*Viscosity*Screw_Speed
Inj_Press + Flow_Rate*Inj_Speed*Viscosity + Inj_Speed*Melt_Temp*Screw_Speed +
Flow_Rate*Inj_Press*Melt_Temp*Viscosity*Screw_Speed
Melt_Temp + Flow_Rate*Viscosity*Screw_Speed + Inj_Speed*Inj_Press*Screw_Speed +
Flow_Rate*Inj_Speed*Inj_Press*Melt_Temp*Viscosity
Viscosity + Flow_Rate*Inj_Speed*Inj_Press + Flow_Rate*Melt_Temp*Screw_Speed +
Inj_Speed*Inj_Press*Melt_Temp*Viscosity*Screw_Speed
Screw_Speed + Flow_Rate*Melt_Temp*Viscosity + Inj_Speed*Inj_Press*Melt_Temp +
Flow_Rate*Inj_Speed*Inj_Press*Viscosity*Screw_Speed
Flow_Rate*Inj_Speed + Inj_Press*Viscosity +
Flow_Rate*Inj_Press*Melt_Temp*Screw_Speed +
Inj_Speed*Melt_Temp*Viscosity*Screw_Speed
Flow_Rate*Inj_Press + Inj_Speed*Viscosity +
Flow_Rate*Inj_Speed*Melt_Temp*Screw_Speed +
Inj_Press*Melt_Temp*Viscosity*Screw_Speed
Flow_Rate*Melt_Temp + Viscosity*Screw_Speed +
Flow_Rate*Inj_Speed*Inj_Press*Screw_Speed +
Inj_Speed*Inj_Press*Melt_Temp*Viscosity
Flow_Rate*Viscosity + Inj_Speed*Inj_Press + Melt_Temp*Screw_Speed +
Flow_Rate*Inj_Speed*Inj_Press*Melt_Temp*Viscosity*Screw_Speed
Flow_Rate*Screw_Speed + Melt_Temp*Viscosity +
Flow_Rate*Inj_Speed*Inj_Press*Melt_Temp +
Inj_Speed*Inj_Press*Viscosity*Screw_Speed
Inj_Speed*Melt_Temp + Inj_Press*Screw_Speed +
Flow_Rate*Inj_Press*Melt_Temp*Viscosity +
Flow_Rate*Inj_Speed*Viscosity*Screw_Speed
Inj_Speed*Screw_Speed + Inj_Press*Melt_Temp +
Flow_Rate*Inj_Speed*Melt_Temp*Viscosity +
Flow_Rate*Inj_Press*Viscosity*Screw_Speed

```



$\text{Flow\_Rate} \times \text{Inj\_Speed} \times \text{Melt\_Temp} + \text{Flow\_Rate} \times \text{Inj\_Press} \times \text{Screw\_Speed} +$   
 $\text{Inj\_Speed} \times \text{Viscosity} \times \text{Screw\_Speed} + \text{Inj\_Press} \times \text{Melt\_Temp} \times \text{Viscosity}$   
 $\text{Flow\_Rate} \times \text{Inj\_Press} \times \text{Melt\_Temp} + \text{Flow\_Rate} \times \text{Inj\_Speed} \times \text{Screw\_Speed} +$   
 $\text{Inj\_Speed} \times \text{Melt\_Temp} \times \text{Viscosity} + \text{Inj\_Press} \times \text{Viscosity} \times \text{Screw\_Speed}$

## Factorial Fit: Black\_dots versus Flow\_Rate, Inj\_Speed, ...

Estimated Effects and Coefficients for Black\_dots (coded units)

| Term                          | Effect | Coef   |
|-------------------------------|--------|--------|
| Constant                      |        | 13.000 |
| Flow_Rate                     | -0.750 | -0.375 |
| Inj_Speed                     | 2.000  | 1.000  |
| Inj_Press                     | -2.500 | -1.250 |
| Melt_Temp                     | -5.500 | -2.750 |
| Viscosity                     | 0.750  | 0.375  |
| Screw_Speed                   | -0.500 | -0.250 |
| Flow_Rate*Inj_Speed           | 3.250  | 1.625  |
| Flow_Rate*Inj_Press           | -4.750 | -2.375 |
| Flow_Rate*Melt_Temp           | -1.250 | -0.625 |
| Flow_Rate*Viscosity           | -4.000 | -2.000 |
| Flow_Rate*Screw_Speed         | 1.250  | 0.625  |
| Inj_Speed*Melt_Temp           | 1.500  | 0.750  |
| Inj_Speed*Screw_Speed         | -1.000 | -0.500 |
| Flow_Rate*Inj_Speed*Melt_Temp | -4.250 | -2.125 |
| Flow_Rate*Inj_Press*Melt_Temp | 5.750  | 2.875  |

S = \* PRESS = \*

Analysis of Variance for Black\_dots (coded units)

| Source                        | DF | Seq SS  | Adj SS  | Adj MS  | F | P |
|-------------------------------|----|---------|---------|---------|---|---|
| Main Effects                  | 6  | 167.500 | 167.500 | 27.917  | * | * |
| Flow_Rate                     | 1  | 2.250   | 2.250   | 2.250   | * | * |
| Inj_Speed                     | 1  | 16.000  | 16.000  | 16.000  | * | * |
| Inj_Press                     | 1  | 25.000  | 25.000  | 25.000  | * | * |
| Melt_Temp                     | 1  | 121.000 | 121.000 | 121.000 | * | * |
| Viscosity                     | 1  | 2.250   | 2.250   | 2.250   | * | * |
| Screw_Speed                   | 1  | 1.000   | 1.000   | 1.000   | * | * |
| 2-Way Interactions            | 7  | 222.000 | 222.000 | 31.714  | * | * |
| Flow_Rate*Inj_Speed           | 1  | 42.250  | 42.250  | 42.250  | * | * |
| Flow_Rate*Inj_Press           | 1  | 90.250  | 90.250  | 90.250  | * | * |
| Flow_Rate*Melt_Temp           | 1  | 6.250   | 6.250   | 6.250   | * | * |
| Flow_Rate*Viscosity           | 1  | 64.000  | 64.000  | 64.000  | * | * |
| Flow_Rate*Screw_Speed         | 1  | 6.250   | 6.250   | 6.250   | * | * |
| Inj_Speed*Melt_Temp           | 1  | 9.000   | 9.000   | 9.000   | * | * |
| Inj_Speed*Screw_Speed         | 1  | 4.000   | 4.000   | 4.000   | * | * |
| 3-Way Interactions            | 2  | 204.500 | 204.500 | 102.250 | * | * |
| Flow_Rate*Inj_Speed*Melt_Temp | 1  | 72.250  | 72.250  | 72.250  | * | * |
| Flow_Rate*Inj_Press*Melt_Temp | 1  | 132.250 | 132.250 | 132.250 | * | * |
| Residual Error                | 0  | *       | *       | *       |   |   |
| Total                         | 15 | 594.000 |         |         |   |   |

Estimated Coefficients for Black\_dots using data in uncoded units

| Term      | Coef     |
|-----------|----------|
| Constant  | -593.366 |
| Flow_Rate | 1706.81  |
| Inj_Speed | -21.5228 |

|                               |           |
|-------------------------------|-----------|
| Inj_Press                     | 6.60640   |
| Melt_Temp                     | -53.3840  |
| Viscosity                     | 228.242   |
| Screw_Speed                   | 719.904   |
| Flow_Rate*Inj_Speed           | 189.671   |
| Flow_Rate*Inj_Press           | -64.3192  |
| Flow_Rate*Melt_Temp           | -6.92488  |
| Flow_Rate*Viscosity           | -75.1174  |
| Flow_Rate*Screw_Speed         | 5.86854   |
| Inj_Speed*Melt_Temp           | 2.43913   |
| Inj_Speed*Screw_Speed         | -32.7941  |
| Flow_Rate*Inj_Speed*Melt_Temp | -0.798122 |
| Flow_Rate*Inj_Press*Melt_Temp | 0.269953  |

## Effects Pareto for Black\_dots

Alias Structure

```

I + Flow_Rate*Inj_Speed*Inj_Press*Viscosity +
    Flow_Rate*Melt_Temp*Viscosity*Screw_Speed +
    Inj_Speed*Inj_Press*Melt_Temp*Screw_Speed
Flow_Rate + Inj_Speed*Inj_Press*Viscosity + Melt_Temp*Viscosity*Screw_Speed +
    Flow_Rate*Inj_Speed*Inj_Press*Melt_Temp*Screw_Speed
Inj_Speed + Flow_Rate*Inj_Press*Viscosity + Inj_Press*Melt_Temp*Screw_Speed +
    Flow_Rate*Inj_Speed*Melt_Temp*Viscosity*Screw_Speed
Inj_Press + Flow_Rate*Inj_Speed*Viscosity + Inj_Speed*Melt_Temp*Screw_Speed +
    Flow_Rate*Inj_Press*Melt_Temp*Viscosity*Screw_Speed
Melt_Temp + Flow_Rate*Viscosity*Screw_Speed + Inj_Speed*Inj_Press*Screw_Speed +
    Flow_Rate*Inj_Speed*Inj_Press*Melt_Temp*Viscosity
Viscosity + Flow_Rate*Inj_Speed*Inj_Press + Flow_Rate*Melt_Temp*Screw_Speed +
    Inj_Speed*Inj_Press*Melt_Temp*Viscosity*Screw_Speed
Screw_Speed + Flow_Rate*Melt_Temp*Viscosity + Inj_Speed*Inj_Press*Melt_Temp +
    Flow_Rate*Inj_Speed*Inj_Press*Viscosity*Screw_Speed
Flow_Rate*Inj_Speed + Inj_Press*Viscosity +
    Flow_Rate*Inj_Press*Melt_Temp*Screw_Speed +
    Inj_Speed*Melt_Temp*Viscosity*Screw_Speed
Flow_Rate*Inj_Press + Inj_Speed*Viscosity +
    Flow_Rate*Inj_Speed*Melt_Temp*Screw_Speed +
    Inj_Press*Melt_Temp*Viscosity*Screw_Speed
Flow_Rate*Melt_Temp + Viscosity*Screw_Speed +
    Flow_Rate*Inj_Speed*Inj_Press*Screw_Speed +
    Inj_Speed*Inj_Press*Melt_Temp*Viscosity
Flow_Rate*Viscosity + Inj_Speed*Inj_Press + Melt_Temp*Screw_Speed +
    Flow_Rate*Inj_Speed*Inj_Press*Melt_Temp*Viscosity*Screw_Speed
Flow_Rate*Screw_Speed + Melt_Temp*Viscosity +
    Flow_Rate*Inj_Speed*Inj_Press*Melt_Temp +
    Inj_Speed*Inj_Press*Viscosity*Screw_Speed
Inj_Speed*Melt_Temp + Inj_Press*Screw_Speed +
    Flow_Rate*Inj_Speed*Viscosity*Screw_Speed +
    Flow_Rate*Inj_Press*Melt_Temp*Viscosity
Inj_Speed*Screw_Speed + Inj_Press*Melt_Temp +
    Flow_Rate*Inj_Speed*Melt_Temp*Viscosity +
    Flow_Rate*Inj_Press*Viscosity*Screw_Speed
Flow_Rate*Inj_Speed*Melt_Temp + Flow_Rate*Inj_Press*Screw_Speed +
    Inj_Speed*Viscosity*Screw_Speed + Inj_Press*Melt_Temp*Viscosity
Flow_Rate*Inj_Speed*Screw_Speed + Flow_Rate*Inj_Press*Melt_Temp +
    Inj_Speed*Melt_Temp*Viscosity + Inj_Press*Viscosity*Screw_Speed

```

Alias Information for Terms in the Model.

Totally confounded terms were removed from the analysis.

$$\begin{aligned}
& I + \text{Flow\_Rate} * \text{Inj\_Speed} * \text{Inj\_Press} * \text{Viscosity} + \\
& \quad \text{Flow\_Rate} * \text{Melt\_Temp} * \text{Viscosity} * \text{Screw\_Speed} + \\
& \quad \text{Inj\_Speed} * \text{Inj\_Press} * \text{Melt\_Temp} * \text{Screw\_Speed} \\
& \text{Flow\_Rate} + \text{Inj\_Speed} * \text{Inj\_Press} * \text{Viscosity} + \text{Melt\_Temp} * \text{Viscosity} * \text{Screw\_Speed} + \\
& \quad \text{Flow\_Rate} * \text{Inj\_Speed} * \text{Inj\_Press} * \text{Melt\_Temp} * \text{Screw\_Speed} \\
& \text{Inj\_Speed} + \text{Flow\_Rate} * \text{Inj\_Press} * \text{Viscosity} + \text{Inj\_Press} * \text{Melt\_Temp} * \text{Screw\_Speed} + \\
& \quad \text{Flow\_Rate} * \text{Inj\_Speed} * \text{Melt\_Temp} * \text{Viscosity} * \text{Screw\_Speed} \\
& \text{Inj\_Press} + \text{Flow\_Rate} * \text{Inj\_Speed} * \text{Viscosity} + \text{Inj\_Speed} * \text{Melt\_Temp} * \text{Screw\_Speed} + \\
& \quad \text{Flow\_Rate} * \text{Inj\_Press} * \text{Melt\_Temp} * \text{Viscosity} * \text{Screw\_Speed} \\
& \text{Melt\_Temp} + \text{Flow\_Rate} * \text{Viscosity} * \text{Screw\_Speed} + \text{Inj\_Speed} * \text{Inj\_Press} * \text{Screw\_Speed} + \\
& \quad \text{Flow\_Rate} * \text{Inj\_Speed} * \text{Inj\_Press} * \text{Melt\_Temp} * \text{Viscosity} \\
& \text{Viscosity} + \text{Flow\_Rate} * \text{Inj\_Speed} * \text{Inj\_Press} + \text{Flow\_Rate} * \text{Melt\_Temp} * \text{Screw\_Speed} + \\
& \quad \text{Inj\_Speed} * \text{Inj\_Press} * \text{Melt\_Temp} * \text{Viscosity} * \text{Screw\_Speed} \\
& \text{Screw\_Speed} + \text{Flow\_Rate} * \text{Melt\_Temp} * \text{Viscosity} + \text{Inj\_Speed} * \text{Inj\_Press} * \text{Melt\_Temp} + \\
& \quad \text{Flow\_Rate} * \text{Inj\_Speed} * \text{Inj\_Press} * \text{Viscosity} * \text{Screw\_Speed} \\
& \text{Flow\_Rate} * \text{Inj\_Speed} + \text{Inj\_Press} * \text{Viscosity} + \\
& \quad \text{Flow\_Rate} * \text{Inj\_Press} * \text{Melt\_Temp} * \text{Screw\_Speed} + \\
& \quad \text{Inj\_Speed} * \text{Melt\_Temp} * \text{Viscosity} * \text{Screw\_Speed} \\
& \text{Flow\_Rate} * \text{Inj\_Press} + \text{Inj\_Speed} * \text{Viscosity} + \\
& \quad \text{Flow\_Rate} * \text{Inj\_Speed} * \text{Melt\_Temp} * \text{Screw\_Speed} + \\
& \quad \text{Inj\_Press} * \text{Melt\_Temp} * \text{Viscosity} * \text{Screw\_Speed} \\
& \text{Flow\_Rate} * \text{Melt\_Temp} + \text{Viscosity} * \text{Screw\_Speed} + \\
& \quad \text{Flow\_Rate} * \text{Inj\_Speed} * \text{Inj\_Press} * \text{Screw\_Speed} + \\
& \quad \text{Inj\_Speed} * \text{Inj\_Press} * \text{Melt\_Temp} * \text{Viscosity} \\
& \text{Flow\_Rate} * \text{Viscosity} + \text{Inj\_Speed} * \text{Inj\_Press} + \text{Melt\_Temp} * \text{Screw\_Speed} + \\
& \quad \text{Flow\_Rate} * \text{Inj\_Speed} * \text{Inj\_Press} * \text{Melt\_Temp} * \text{Viscosity} * \text{Screw\_Speed} \\
& \text{Flow\_Rate} * \text{Screw\_Speed} + \text{Melt\_Temp} * \text{Viscosity} + \\
& \quad \text{Flow\_Rate} * \text{Inj\_Speed} * \text{Inj\_Press} * \text{Melt\_Temp} + \\
& \quad \text{Inj\_Speed} * \text{Inj\_Press} * \text{Viscosity} * \text{Screw\_Speed} \\
& \text{Inj\_Speed} * \text{Melt\_Temp} + \text{Inj\_Press} * \text{Screw\_Speed} + \\
& \quad \text{Flow\_Rate} * \text{Inj\_Press} * \text{Melt\_Temp} * \text{Viscosity} + \\
& \quad \text{Flow\_Rate} * \text{Inj\_Speed} * \text{Viscosity} * \text{Screw\_Speed} \\
& \text{Inj\_Speed} * \text{Screw\_Speed} + \text{Inj\_Press} * \text{Melt\_Temp} + \\
& \quad \text{Flow\_Rate} * \text{Inj\_Speed} * \text{Melt\_Temp} * \text{Viscosity} + \\
& \quad \text{Flow\_Rate} * \text{Inj\_Press} * \text{Viscosity} * \text{Screw\_Speed} \\
& \text{Flow\_Rate} * \text{Inj\_Speed} * \text{Melt\_Temp} + \text{Flow\_Rate} * \text{Inj\_Press} * \text{Screw\_Speed} + \\
& \quad \text{Inj\_Speed} * \text{Viscosity} * \text{Screw\_Speed} + \text{Inj\_Press} * \text{Melt\_Temp} * \text{Viscosity} \\
& \text{Flow\_Rate} * \text{Inj\_Press} * \text{Melt\_Temp} + \text{Flow\_Rate} * \text{Inj\_Speed} * \text{Screw\_Speed} + \\
& \quad \text{Inj\_Speed} * \text{Melt\_Temp} * \text{Viscosity} + \text{Inj\_Press} * \text{Viscosity} * \text{Screw\_Speed}
\end{aligned}$$

## Factorial Fit: Black\_dots versus Flow\_Rate, Inj\_Speed, ...

Estimated Effects and Coefficients for Black\_dots (coded units)

| Term                          | Effect | Coef   |
|-------------------------------|--------|--------|
| Constant                      |        | 13.250 |
| Flow_Rate                     | -0.250 | -0.125 |
| Inj_Speed                     | 1.500  | 0.750  |
| Inj_Press                     | -2.000 | -1.000 |
| Melt_Temp                     | -5.000 | -2.500 |
| Viscosity                     | 0.250  | 0.125  |
| Screw_Speed                   | -1.000 | -0.500 |
| Flow_Rate*Inj_Speed           | 2.750  | 1.375  |
| Flow_Rate*Inj_Press           | -4.250 | -2.125 |
| Flow_Rate*Melt_Temp           | -0.750 | -0.375 |
| Flow_Rate*Viscosity           | -4.500 | -2.250 |
| Flow_Rate*Screw_Speed         | 0.750  | 0.375  |
| Inj_Speed*Melt_Temp           | 1.000  | 0.500  |
| Inj_Speed*Screw_Speed         | -0.500 | -0.250 |
| Flow_Rate*Inj_Speed*Melt_Temp | -4.750 | -2.375 |
| Flow_Rate*Inj_Press*Melt_Temp | 6.250  | 3.125  |

S = \* PRESS = \*

#### Analysis of Variance for Black\_dots (coded units)

| Source                        | DF | Seq SS  | Adj SS  | Adj MS  | F | P |
|-------------------------------|----|---------|---------|---------|---|---|
| Main Effects                  | 6  | 129.500 | 129.500 | 21.583  | * | * |
| Flow_Rate                     | 1  | 0.250   | 0.250   | 0.250   | * | * |
| Inj_Speed                     | 1  | 9.000   | 9.000   | 9.000   | * | * |
| Inj_Press                     | 1  | 16.000  | 16.000  | 16.000  | * | * |
| Melt_Temp                     | 1  | 100.000 | 100.000 | 100.000 | * | * |
| Viscosity                     | 1  | 0.250   | 0.250   | 0.250   | * | * |
| Screw_Speed                   | 1  | 4.000   | 4.000   | 4.000   | * | * |
| 2-Way Interactions            | 7  | 193.000 | 193.000 | 27.571  | * | * |
| Flow_Rate*Inj_Speed           | 1  | 30.250  | 30.250  | 30.250  | * | * |
| Flow_Rate*Inj_Press           | 1  | 72.250  | 72.250  | 72.250  | * | * |
| Flow_Rate*Melt_Temp           | 1  | 2.250   | 2.250   | 2.250   | * | * |
| Flow_Rate*Viscosity           | 1  | 81.000  | 81.000  | 81.000  | * | * |
| Flow_Rate*Screw_Speed         | 1  | 2.250   | 2.250   | 2.250   | * | * |
| Inj_Speed*Melt_Temp           | 1  | 4.000   | 4.000   | 4.000   | * | * |
| Inj_Speed*Screw_Speed         | 1  | 1.000   | 1.000   | 1.000   | * | * |
| 3-Way Interactions            | 2  | 246.500 | 246.500 | 123.250 | * | * |
| Flow_Rate*Inj_Speed*Melt_Temp | 1  | 90.250  | 90.250  | 90.250  | * | * |
| Flow_Rate*Inj_Press*Melt_Temp | 1  | 156.250 | 156.250 | 156.250 | * | * |
| Residual Error                | 0  | *       | *       | *       |   |   |
| Total                         | 15 | 569.000 |         |         |   |   |

#### Estimated Coefficients for Black\_dots using data in uncoded units

| Term                          | Coef      |
|-------------------------------|-----------|
| Constant                      | -246.113  |
| Flow_Rate                     | 1714.32   |
| Inj_Speed                     | -35.1941  |
| Inj_Press                     | 5.92283   |
| Melt_Temp                     | -60.2197  |
| Viscosity                     | 255.585   |
| Screw_Speed                   | 788.261   |
| Flow_Rate*Inj_Speed           | 210.329   |
| Flow_Rate*Inj_Press           | -69.4836  |
| Flow_Rate*Melt_Temp           | -6.69014  |
| Flow_Rate*Viscosity           | -84.5070  |
| Flow_Rate*Screw_Speed         | 3.52113   |
| Inj_Speed*Melt_Temp           | 2.71256   |
| Inj_Speed*Screw_Speed         | -35.5284  |
| Flow_Rate*Inj_Speed*Melt_Temp | -0.892019 |
| Flow_Rate*Inj_Press*Melt_Temp | 0.293427  |

### Effects Pareto for Black\_dots

#### Alias Structure

```

I + Flow_Rate*Inj_Speed*Inj_Press*Viscosity +
    Flow_Rate*Melt_Temp*Viscosity*Screw_Speed +
    Inj_Speed*Inj_Press*Melt_Temp*Screw_Speed
Flow_Rate + Inj_Speed*Inj_Press*Viscosity + Melt_Temp*Viscosity*Screw_Speed +
    Flow_Rate*Inj_Speed*Inj_Press*Melt_Temp*Screw_Speed
Inj_Speed + Flow_Rate*Inj_Press*Viscosity + Inj_Press*Melt_Temp*Screw_Speed +
    Flow_Rate*Inj_Speed*Melt_Temp*Viscosity*Screw_Speed

```

$$\begin{aligned}
& \text{Inj\_Press} + \text{Flow\_Rate} * \text{Inj\_Speed} * \text{Viscosity} + \text{Inj\_Speed} * \text{Melt\_Temp} * \text{Screw\_Speed} + \\
& \quad \text{Flow\_Rate} * \text{Inj\_Press} * \text{Melt\_Temp} * \text{Viscosity} * \text{Screw\_Speed} \\
& \text{Melt\_Temp} + \text{Flow\_Rate} * \text{Viscosity} * \text{Screw\_Speed} + \text{Inj\_Speed} * \text{Inj\_Press} * \text{Screw\_Speed} + \\
& \quad \text{Flow\_Rate} * \text{Inj\_Speed} * \text{Inj\_Press} * \text{Melt\_Temp} * \text{Viscosity} \\
& \text{Viscosity} + \text{Flow\_Rate} * \text{Inj\_Speed} * \text{Inj\_Press} + \text{Flow\_Rate} * \text{Melt\_Temp} * \text{Screw\_Speed} + \\
& \quad \text{Inj\_Speed} * \text{Inj\_Press} * \text{Melt\_Temp} * \text{Viscosity} * \text{Screw\_Speed} \\
& \text{Screw\_Speed} + \text{Flow\_Rate} * \text{Melt\_Temp} * \text{Viscosity} + \text{Inj\_Speed} * \text{Inj\_Press} * \text{Melt\_Temp} + \\
& \quad \text{Flow\_Rate} * \text{Inj\_Speed} * \text{Inj\_Press} * \text{Viscosity} * \text{Screw\_Speed} \\
& \text{Flow\_Rate} * \text{Inj\_Speed} + \text{Inj\_Press} * \text{Viscosity} + \\
& \quad \text{Flow\_Rate} * \text{Inj\_Press} * \text{Melt\_Temp} * \text{Screw\_Speed} + \\
& \quad \text{Inj\_Speed} * \text{Melt\_Temp} * \text{Viscosity} * \text{Screw\_Speed} \\
& \text{Flow\_Rate} * \text{Inj\_Press} + \text{Inj\_Speed} * \text{Viscosity} + \\
& \quad \text{Flow\_Rate} * \text{Inj\_Speed} * \text{Melt\_Temp} * \text{Screw\_Speed} + \\
& \quad \text{Inj\_Press} * \text{Melt\_Temp} * \text{Viscosity} * \text{Screw\_Speed} \\
& \text{Flow\_Rate} * \text{Melt\_Temp} + \text{Viscosity} * \text{Screw\_Speed} + \\
& \quad \text{Flow\_Rate} * \text{Inj\_Speed} * \text{Inj\_Press} * \text{Screw\_Speed} + \\
& \quad \text{Inj\_Speed} * \text{Inj\_Press} * \text{Melt\_Temp} * \text{Viscosity} \\
& \text{Flow\_Rate} * \text{Viscosity} + \text{Inj\_Speed} * \text{Inj\_Press} + \text{Melt\_Temp} * \text{Screw\_Speed} + \\
& \quad \text{Flow\_Rate} * \text{Inj\_Speed} * \text{Inj\_Press} * \text{Melt\_Temp} * \text{Viscosity} * \text{Screw\_Speed} \\
& \text{Flow\_Rate} * \text{Screw\_Speed} + \text{Melt\_Temp} * \text{Viscosity} + \\
& \quad \text{Flow\_Rate} * \text{Inj\_Speed} * \text{Inj\_Press} * \text{Melt\_Temp} + \\
& \quad \text{Inj\_Speed} * \text{Inj\_Press} * \text{Viscosity} * \text{Screw\_Speed} \\
& \text{Inj\_Speed} * \text{Melt\_Temp} + \text{Inj\_Press} * \text{Screw\_Speed} + \\
& \quad \text{Flow\_Rate} * \text{Inj\_Speed} * \text{Viscosity} * \text{Screw\_Speed} + \\
& \quad \text{Flow\_Rate} * \text{Inj\_Press} * \text{Melt\_Temp} * \text{Viscosity} \\
& \text{Inj\_Speed} * \text{Screw\_Speed} + \text{Inj\_Press} * \text{Melt\_Temp} + \\
& \quad \text{Flow\_Rate} * \text{Inj\_Speed} * \text{Melt\_Temp} * \text{Viscosity} + \\
& \quad \text{Flow\_Rate} * \text{Inj\_Press} * \text{Viscosity} * \text{Screw\_Speed} \\
& \text{Flow\_Rate} * \text{Inj\_Speed} * \text{Melt\_Temp} + \text{Flow\_Rate} * \text{Inj\_Press} * \text{Screw\_Speed} + \\
& \quad \text{Inj\_Speed} * \text{Viscosity} * \text{Screw\_Speed} + \text{Inj\_Press} * \text{Melt\_Temp} * \text{Viscosity} \\
& \text{Flow\_Rate} * \text{Inj\_Speed} * \text{Screw\_Speed} + \text{Flow\_Rate} * \text{Inj\_Press} * \text{Melt\_Temp} + \\
& \quad \text{Inj\_Speed} * \text{Melt\_Temp} * \text{Viscosity} + \text{Inj\_Press} * \text{Viscosity} * \text{Screw\_Speed}
\end{aligned}$$

Alias Information for Terms in the Model.

Totally confounded terms were removed from the analysis.

$$\begin{aligned}
& \text{Flow\_Rate} + \text{Inj\_Speed} * \text{Inj\_Press} * \text{Viscosity} + \text{Melt\_Temp} * \text{Viscosity} * \text{Screw\_Speed} \\
& \text{Inj\_Speed} + \text{Flow\_Rate} * \text{Inj\_Press} * \text{Viscosity} + \text{Inj\_Press} * \text{Melt\_Temp} * \text{Screw\_Speed} \\
& \text{Inj\_Press} + \text{Flow\_Rate} * \text{Inj\_Speed} * \text{Viscosity} + \text{Inj\_Speed} * \text{Melt\_Temp} * \text{Screw\_Speed} \\
& \text{Melt\_Temp} + \text{Flow\_Rate} * \text{Viscosity} * \text{Screw\_Speed} + \text{Inj\_Speed} * \text{Inj\_Press} * \text{Screw\_Speed} \\
& \text{Viscosity} + \text{Flow\_Rate} * \text{Inj\_Speed} * \text{Inj\_Press} + \text{Flow\_Rate} * \text{Melt\_Temp} * \text{Screw\_Speed} \\
& \text{Screw\_Speed} + \text{Flow\_Rate} * \text{Melt\_Temp} * \text{Viscosity} + \text{Inj\_Speed} * \text{Inj\_Press} * \text{Melt\_Temp} \\
& \text{Flow\_Rate} * \text{Inj\_Speed} + \text{Inj\_Press} * \text{Viscosity} \\
& \text{Flow\_Rate} * \text{Inj\_Press} + \text{Inj\_Speed} * \text{Viscosity} \\
& \text{Flow\_Rate} * \text{Melt\_Temp} + \text{Viscosity} * \text{Screw\_Speed} \\
& \text{Flow\_Rate} * \text{Viscosity} + \text{Inj\_Speed} * \text{Inj\_Press} + \text{Melt\_Temp} * \text{Screw\_Speed} \\
& \text{Flow\_Rate} * \text{Screw\_Speed} + \text{Melt\_Temp} * \text{Viscosity} \\
& \text{Inj\_Speed} * \text{Melt\_Temp} + \text{Inj\_Press} * \text{Screw\_Speed} \\
& \text{Inj\_Speed} * \text{Screw\_Speed} + \text{Inj\_Press} * \text{Melt\_Temp} \\
& \text{Flow\_Rate} * \text{Inj\_Speed} * \text{Melt\_Temp} + \text{Flow\_Rate} * \text{Inj\_Press} * \text{Screw\_Speed} + \\
& \quad \text{Inj\_Speed} * \text{Viscosity} * \text{Screw\_Speed} + \text{Inj\_Press} * \text{Melt\_Temp} * \text{Viscosity} \\
& \text{Flow\_Rate} * \text{Inj\_Speed} * \text{Screw\_Speed} + \text{Flow\_Rate} * \text{Inj\_Press} * \text{Melt\_Temp} + \\
& \quad \text{Inj\_Speed} * \text{Melt\_Temp} * \text{Viscosity} + \text{Inj\_Press} * \text{Viscosity} * \text{Screw\_Speed}
\end{aligned}$$

## Factorial Fit: Black\_dots versus Flow\_Rate, Inj\_Speed, ...

Estimated Effects and Coefficients for Black\_dots (coded units)

| Term      | Effect | Coef   |
|-----------|--------|--------|
| Constant  |        | 13.250 |
| Flow_Rate | -0.250 | -0.125 |
| Inj_Speed | 1.500  | 0.750  |

|                                 |        |        |
|---------------------------------|--------|--------|
| Inj_Press                       | -2.000 | -1.000 |
| Melt_Temp                       | -5.000 | -2.500 |
| Viscosity                       | 0.250  | 0.125  |
| Screw_Speed                     | -1.000 | -0.500 |
| Flow_Rate*Inj_Speed             | 2.750  | 1.375  |
| Flow_Rate*Inj_Press             | -4.250 | -2.125 |
| Flow_Rate*Melt_Temp             | -0.750 | -0.375 |
| Flow_Rate*Viscosity             | -4.500 | -2.250 |
| Flow_Rate*Screw_Speed           | 0.750  | 0.375  |
| Inj_Speed*Melt_Temp             | 1.000  | 0.500  |
| Inj_Speed*Screw_Speed           | -0.500 | -0.250 |
| Flow_Rate*Inj_Speed*Melt_Temp   | -4.750 | -2.375 |
| Flow_Rate*Inj_Speed*Screw_Speed | 6.250  | 3.125  |

S = \* PRESS = \*

Analysis of Variance for Black\_dots (coded units)

| Source                          | DF | Seq SS  | Adj SS  | Adj MS  | F | P |
|---------------------------------|----|---------|---------|---------|---|---|
| Main Effects                    | 6  | 129.500 | 129.500 | 21.583  | * | * |
| Flow_Rate                       | 1  | 0.250   | 0.250   | 0.250   | * | * |
| Inj_Speed                       | 1  | 9.000   | 9.000   | 9.000   | * | * |
| Inj_Press                       | 1  | 16.000  | 16.000  | 16.000  | * | * |
| Melt_Temp                       | 1  | 100.000 | 100.000 | 100.000 | * | * |
| Viscosity                       | 1  | 0.250   | 0.250   | 0.250   | * | * |
| Screw_Speed                     | 1  | 4.000   | 4.000   | 4.000   | * | * |
| 2-Way Interactions              | 7  | 193.000 | 193.000 | 27.571  | * | * |
| Flow_Rate*Inj_Speed             | 1  | 30.250  | 30.250  | 30.250  | * | * |
| Flow_Rate*Inj_Press             | 1  | 72.250  | 72.250  | 72.250  | * | * |
| Flow_Rate*Melt_Temp             | 1  | 2.250   | 2.250   | 2.250   | * | * |
| Flow_Rate*Viscosity             | 1  | 81.000  | 81.000  | 81.000  | * | * |
| Flow_Rate*Screw_Speed           | 1  | 2.250   | 2.250   | 2.250   | * | * |
| Inj_Speed*Melt_Temp             | 1  | 4.000   | 4.000   | 4.000   | * | * |
| Inj_Speed*Screw_Speed           | 1  | 1.000   | 1.000   | 1.000   | * | * |
| 3-Way Interactions              | 2  | 246.500 | 246.500 | 123.250 | * | * |
| Flow_Rate*Inj_Speed*Melt_Temp   | 1  | 90.250  | 90.250  | 90.250  | * | * |
| Flow_Rate*Inj_Speed*Screw_Speed | 1  | 156.250 | 156.250 | 156.250 | * | * |
| Residual Error                  | 0  | *       | *       | *       |   |   |
| Total                           | 15 | 569.000 |         |         |   |   |

Estimated Coefficients for Black\_dots using data in uncoded units

| Term                            | Coef      |
|---------------------------------|-----------|
| Constant                        | -246.113  |
| Flow_Rate                       | 129.812   |
| Inj_Speed                       | -35.1941  |
| Inj_Press                       | 5.92283   |
| Melt_Temp                       | -60.2197  |
| Viscosity                       | 255.585   |
| Screw_Speed                     | 788.261   |
| Flow_Rate*Inj_Speed             | 10.7981   |
| Flow_Rate*Inj_Press             | -1.99531  |
| Flow_Rate*Melt_Temp             | 19.7183   |
| Flow_Rate*Viscosity             | -84.5070  |
| Flow_Rate*Screw_Speed           | -260.563  |
| Inj_Speed*Melt_Temp             | 2.71256   |
| Inj_Speed*Screw_Speed           | -35.5284  |
| Flow_Rate*Inj_Speed*Melt_Temp   | -0.892019 |
| Flow_Rate*Inj_Speed*Screw_Speed | 11.7371   |

## Effects Pareto for Black\_dots

Alias Structure

```
I + Flow_Rate*Inj_Speed*Inj_Press*Viscosity +
    Flow_Rate*Melt_Temp*Viscosity*Screw_Speed +
    Inj_Speed*Inj_Press*Melt_Temp*Screw_Speed
Flow_Rate + Inj_Speed*Inj_Press*Viscosity + Melt_Temp*Viscosity*Screw_Speed +
    Flow_Rate*Inj_Speed*Inj_Press*Melt_Temp*Screw_Speed
Inj_Speed + Flow_Rate*Inj_Press*Viscosity + Inj_Press*Melt_Temp*Screw_Speed +
    Flow_Rate*Inj_Speed*Melt_Temp*Viscosity*Screw_Speed
Inj_Press + Flow_Rate*Inj_Speed*Viscosity + Inj_Speed*Melt_Temp*Screw_Speed +
    Flow_Rate*Inj_Press*Melt_Temp*Viscosity*Screw_Speed
Melt_Temp + Flow_Rate*Viscosity*Screw_Speed + Inj_Speed*Inj_Press*Screw_Speed +
    Flow_Rate*Inj_Speed*Inj_Press*Melt_Temp*Viscosity
Viscosity + Flow_Rate*Inj_Speed*Inj_Press + Flow_Rate*Melt_Temp*Screw_Speed +
    Inj_Speed*Inj_Press*Melt_Temp*Viscosity*Screw_Speed
Screw_Speed + Flow_Rate*Melt_Temp*Viscosity + Inj_Speed*Inj_Press*Melt_Temp +
    Flow_Rate*Inj_Speed*Inj_Press*Viscosity*Screw_Speed
Flow_Rate*Inj_Speed + Inj_Press*Viscosity +
    Flow_Rate*Inj_Press*Melt_Temp*Screw_Speed +
    Inj_Speed*Melt_Temp*Viscosity*Screw_Speed
Flow_Rate*Inj_Press + Inj_Speed*Viscosity +
    Flow_Rate*Inj_Speed*Melt_Temp*Screw_Speed +
    Inj_Press*Melt_Temp*Viscosity*Screw_Speed
Flow_Rate*Melt_Temp + Viscosity*Screw_Speed +
    Flow_Rate*Inj_Speed*Inj_Press*Screw_Speed +
    Inj_Speed*Inj_Press*Melt_Temp*Viscosity
Flow_Rate*Viscosity + Inj_Speed*Inj_Press + Melt_Temp*Screw_Speed +
    Flow_Rate*Inj_Speed*Inj_Press*Melt_Temp*Viscosity*Screw_Speed
Flow_Rate*Screw_Speed + Melt_Temp*Viscosity +
    Flow_Rate*Inj_Speed*Inj_Press*Melt_Temp +
    Inj_Speed*Inj_Press*Viscosity*Screw_Speed
Inj_Speed*Melt_Temp + Inj_Press*Screw_Speed +
    Flow_Rate*Inj_Speed*Viscosity*Screw_Speed +
    Flow_Rate*Inj_Press*Melt_Temp*Viscosity
Inj_Speed*Screw_Speed + Inj_Press*Melt_Temp +
    Flow_Rate*Inj_Speed*Melt_Temp*Viscosity +
    Flow_Rate*Inj_Press*Viscosity*Screw_Speed
Flow_Rate*Inj_Speed*Melt_Temp + Flow_Rate*Inj_Press*Screw_Speed +
    Inj_Speed*Viscosity*Screw_Speed + Inj_Press*Melt_Temp*Viscosity
Flow_Rate*Inj_Speed*Screw_Speed + Flow_Rate*Inj_Press*Melt_Temp +
    Inj_Speed*Melt_Temp*Viscosity + Inj_Press*Viscosity*Screw_Speed
```

Alias Information for Terms in the Model.

Totally confounded terms were removed from the analysis.

```
Flow_Rate + Inj_Speed*Inj_Press*Viscosity + Melt_Temp*Viscosity*Screw_Speed
Inj_Speed + Flow_Rate*Inj_Press*Viscosity + Inj_Press*Melt_Temp*Screw_Speed
Inj_Press + Flow_Rate*Inj_Speed*Viscosity + Inj_Speed*Melt_Temp*Screw_Speed
Melt_Temp + Flow_Rate*Viscosity*Screw_Speed + Inj_Speed*Inj_Press*Screw_Speed
Viscosity + Flow_Rate*Inj_Speed*Inj_Press + Flow_Rate*Melt_Temp*Screw_Speed
Screw_Speed + Flow_Rate*Melt_Temp*Viscosity + Inj_Speed*Inj_Press*Melt_Temp
Flow_Rate*Inj_Speed + Inj_Press*Viscosity
Flow_Rate*Inj_Press + Inj_Speed*Viscosity
Flow_Rate*Melt_Temp + Viscosity*Screw_Speed
Flow_Rate*Viscosity + Inj_Speed*Inj_Press + Melt_Temp*Screw_Speed
Flow_Rate*Screw_Speed + Melt_Temp*Viscosity
Inj_Speed*Melt_Temp + Inj_Press*Screw_Speed
Inj_Speed*Screw_Speed + Inj_Press*Melt_Temp
Flow_Rate*Inj_Speed*Melt_Temp + Flow_Rate*Inj_Press*Screw_Speed +
```

$\text{Inj\_Speed} * \text{Viscosity} * \text{Screw\_Speed} + \text{Inj\_Press} * \text{Melt\_Temp} * \text{Viscosity}$   
 $\text{Flow\_Rate} * \text{Inj\_Speed} * \text{Screw\_Speed} + \text{Flow\_Rate} * \text{Inj\_Press} * \text{Melt\_Temp} +$   
 $\text{Inj\_Speed} * \text{Melt\_Temp} * \text{Viscosity} + \text{Inj\_Press} * \text{Viscosity} * \text{Screw\_Speed}$

## Factorial Fit: Black\_dots versus Flow\_Rate, Inj\_Speed, ...

Estimated Effects and Coefficients for Black\_dots (coded units)

| Term                            | Effect | Coef   |
|---------------------------------|--------|--------|
| Constant                        |        | 13.250 |
| Flow_Rate                       | -0.250 | -0.125 |
| Inj_Speed                       | 1.500  | 0.750  |
| Inj_Press                       | -2.000 | -1.000 |
| Melt_Temp                       | -5.000 | -2.500 |
| Viscosity                       | 0.250  | 0.125  |
| Screw_Speed                     | -1.000 | -0.500 |
| Flow_Rate*Inj_Speed             | 2.750  | 1.375  |
| Flow_Rate*Inj_Press             | -4.250 | -2.125 |
| Flow_Rate*Melt_Temp             | -0.750 | -0.375 |
| Flow_Rate*Viscosity             | -4.500 | -2.250 |
| Flow_Rate*Screw_Speed           | 0.750  | 0.375  |
| Inj_Speed*Melt_Temp             | 1.000  | 0.500  |
| Inj_Speed*Screw_Speed           | -0.500 | -0.250 |
| Flow_Rate*Inj_Speed*Melt_Temp   | -4.750 | -2.375 |
| Flow_Rate*Inj_Speed*Screw_Speed | 6.250  | 3.125  |

S = \* PRESS = \*

Analysis of Variance for Black\_dots (coded units)

| Source                          | DF | Seq SS  | Adj SS  | Adj MS  | F | P |
|---------------------------------|----|---------|---------|---------|---|---|
| Main Effects                    | 6  | 129.500 | 129.500 | 21.583  | * | * |
| Flow_Rate                       | 1  | 0.250   | 0.250   | 0.250   | * | * |
| Inj_Speed                       | 1  | 9.000   | 9.000   | 9.000   | * | * |
| Inj_Press                       | 1  | 16.000  | 16.000  | 16.000  | * | * |
| Melt_Temp                       | 1  | 100.000 | 100.000 | 100.000 | * | * |
| Viscosity                       | 1  | 0.250   | 0.250   | 0.250   | * | * |
| Screw_Speed                     | 1  | 4.000   | 4.000   | 4.000   | * | * |
| 2-Way Interactions              | 7  | 193.000 | 193.000 | 27.571  | * | * |
| Flow_Rate*Inj_Speed             | 1  | 30.250  | 30.250  | 30.250  | * | * |
| Flow_Rate*Inj_Press             | 1  | 72.250  | 72.250  | 72.250  | * | * |
| Flow_Rate*Melt_Temp             | 1  | 2.250   | 2.250   | 2.250   | * | * |
| Flow_Rate*Viscosity             | 1  | 81.000  | 81.000  | 81.000  | * | * |
| Flow_Rate*Screw_Speed           | 1  | 2.250   | 2.250   | 2.250   | * | * |
| Inj_Speed*Melt_Temp             | 1  | 4.000   | 4.000   | 4.000   | * | * |
| Inj_Speed*Screw_Speed           | 1  | 1.000   | 1.000   | 1.000   | * | * |
| 3-Way Interactions              | 2  | 246.500 | 246.500 | 123.250 | * | * |
| Flow_Rate*Inj_Speed*Melt_Temp   | 1  | 90.250  | 90.250  | 90.250  | * | * |
| Flow_Rate*Inj_Speed*Screw_Speed | 1  | 156.250 | 156.250 | 156.250 | * | * |
| Residual Error                  | 0  | *       | *       | *       |   |   |
| Total                           | 15 | 569.000 |         |         |   |   |

Estimated Coefficients for Black\_dots using data in uncoded units

| Term      | Coef     |
|-----------|----------|
| Constant  | -246.113 |
| Flow_Rate | 129.812  |
| Inj_Speed | -35.1941 |
| Inj_Press | 5.92283  |



|                                 |           |
|---------------------------------|-----------|
| Melt_Temp                       | -60.2197  |
| Viscosity                       | 255.585   |
| Screw_Speed                     | 788.261   |
| Flow_Rate*Inj_Speed             | 10.7981   |
| Flow_Rate*Inj_Press             | -1.99531  |
| Flow_Rate*Melt_Temp             | 19.7183   |
| Flow_Rate*Viscosity             | -84.5070  |
| Flow_Rate*Screw_Speed           | -260.563  |
| Inj_Speed*Melt_Temp             | 2.71256   |
| Inj_Speed*Screw_Speed           | -35.5284  |
| Flow_Rate*Inj_Speed*Melt_Temp   | -0.892019 |
| Flow_Rate*Inj_Speed*Screw_Speed | 11.7371   |

## Effects Pareto for Black\_dots

## Half Normal Effects Plot for Black\_dots

Alias Structure

```

I + Flow_Rate*Inj_Speed*Inj_Press*Viscosity +
    Flow_Rate*Melt_Temp*Viscosity*Screw_Speed +
    Inj_Speed*Inj_Press*Melt_Temp*Screw_Speed
Flow_Rate + Inj_Speed*Inj_Press*Viscosity + Melt_Temp*Viscosity*Screw_Speed +
    Flow_Rate*Inj_Speed*Inj_Press*Melt_Temp*Screw_Speed
Inj_Speed + Flow_Rate*Inj_Press*Viscosity + Inj_Press*Melt_Temp*Screw_Speed +
    Flow_Rate*Inj_Speed*Melt_Temp*Viscosity*Screw_Speed
Inj_Press + Flow_Rate*Inj_Speed*Viscosity + Inj_Speed*Melt_Temp*Screw_Speed +
    Flow_Rate*Inj_Press*Melt_Temp*Viscosity*Screw_Speed
Melt_Temp + Flow_Rate*Viscosity*Screw_Speed + Inj_Speed*Inj_Press*Screw_Speed +
    Flow_Rate*Inj_Speed*Inj_Press*Melt_Temp*Viscosity
Viscosity + Flow_Rate*Inj_Speed*Inj_Press + Flow_Rate*Melt_Temp*Screw_Speed +
    Inj_Speed*Inj_Press*Melt_Temp*Viscosity*Screw_Speed
Screw_Speed + Flow_Rate*Melt_Temp*Viscosity + Inj_Speed*Inj_Press*Melt_Temp +
    Flow_Rate*Inj_Speed*Inj_Press*Viscosity*Screw_Speed
Flow_Rate*Inj_Speed + Inj_Press*Viscosity +
    Flow_Rate*Inj_Press*Melt_Temp*Screw_Speed +
    Inj_Speed*Melt_Temp*Viscosity*Screw_Speed
Flow_Rate*Inj_Press + Inj_Speed*Viscosity +
    Flow_Rate*Inj_Speed*Melt_Temp*Screw_Speed +
    Inj_Press*Melt_Temp*Viscosity*Screw_Speed
Flow_Rate*Melt_Temp + Viscosity*Screw_Speed +
    Flow_Rate*Inj_Speed*Inj_Press*Screw_Speed +
    Inj_Speed*Inj_Press*Melt_Temp*Viscosity
Flow_Rate*Viscosity + Inj_Speed*Inj_Press + Melt_Temp*Screw_Speed +
    Flow_Rate*Inj_Speed*Inj_Press*Melt_Temp*Viscosity*Screw_Speed
Flow_Rate*Screw_Speed + Melt_Temp*Viscosity +
    Flow_Rate*Inj_Speed*Inj_Press*Melt_Temp +
    Inj_Speed*Inj_Press*Viscosity*Screw_Speed
Inj_Speed*Melt_Temp + Inj_Press*Screw_Speed +
    Flow_Rate*Inj_Speed*Viscosity*Screw_Speed +
    Flow_Rate*Inj_Press*Melt_Temp*Viscosity
Inj_Speed*Screw_Speed + Inj_Press*Melt_Temp +
    Flow_Rate*Inj_Speed*Melt_Temp*Viscosity +
    Flow_Rate*Inj_Press*Viscosity*Screw_Speed
Flow_Rate*Inj_Speed*Melt_Temp + Flow_Rate*Inj_Press*Screw_Speed +
    Inj_Speed*Viscosity*Screw_Speed + Inj_Press*Melt_Temp*Viscosity
Flow_Rate*Inj_Speed*Screw_Speed + Flow_Rate*Inj_Press*Melt_Temp +
    Inj_Speed*Melt_Temp*Viscosity + Inj_Press*Viscosity*Screw_Speed

```
